# Supplementary material
Source: PubMed Central journal article supplement (PMC3276365)

# Synthesis and Anticancer Activity of Sclerophytin-Inspired Isobenzofurans

*T. David Bateman, Aarti L. Joshi, Kwangyul Moon, Elena N. Galitovskaya, Meenakshi Upreti, Timothy C. Chambers, and Matthias C. McIntosh*

## Supporting Information

### Contents

|                                                          |                |
|----------------------------------------------------------|----------------|
| <b>Materials and Instrumentation</b>                     | <b>S1</b>      |
| <b>Experimental Procedures and Characterization Data</b> | <b>S2-S10</b>  |
| <b>Biological Assays</b>                                 | <b>S10-11</b>  |
| <b><sup>1</sup>H and <sup>13</sup>C NMR Spectra</b>      | <b>S12-S79</b> |
| <b>NCI 60-cell line data</b>                             | <b>S79-S86</b> |

**Materials and Instrumentation.** All commercially available compounds were purchased from Aldrich Chemical Co., Alfa Aesar Organics, or TCI and used as received unless otherwise noted. Ether, THF, CH<sub>3</sub>CN, and CH<sub>2</sub>Cl<sub>2</sub> were dried over alumina using the Solv-Tec<sup>®</sup> ST-002 solvent purification system. Microwave reactions were carried out using a CEM Discover<sup>®</sup> series reactor. Bruker 300 and 400 MHz spectrometers and a JEOL 270 MHz spectrometer were employed for NMR data collection.

## Experimental Procedures

**Anti-alcohol 3a.** To a solution of diisopropylamine (49.9 mmol, 1.5 eq) in dry THF (200 mL) was added n-BuLi (3.20 g, 49.9 mmol, 1.5 eq, 2.81 M in hexane) dropwise at -78 °C. After 15 min, (*S*)-(+)-carvone (5.00 g, 33.3 mmol, 1 eq) was added dropwise, followed after 30 min by slow addition of 2-bromobenzaldehyde (7.4 g, 39.9 mmol, 1.2 eq) over 45 min. The mixture was allowed to stir at -78 °C until no starting material was observed by TLC (~ 6 h). Glacial HOAc (3.00 g, 49.9 mmol, 1.5 eq) was then added to the reaction mixture at -78 °C. After ~5 min the reaction mixture was warmed to rt and diluted with ether (100 mL), washed with water (150 mL) and extracted with ether (3 x 100 mL). The combined organic extracts were then washed with brine, dried over MgSO<sub>4</sub>, and concentrated in vacuo. The crude product was purified via flash chromatography over silica gel (10:90 EtOAc/hexanes) to deliver the desired *anti*-alcohol **3a** as a colorless oil in 77 % yield (8.56 g, 28.6 mmol). <sup>1</sup>H-NMR (270 MHz, CDCl<sub>3</sub>) δ 7.74–7.62 (d, *J*=7.55 Hz, 1H), 7.60–7.47 (d, *J*=7.99 Hz, 1H), 7.36–7.34 (t, *J*=7.55 Hz, 1H), 7.14–7.11 (t, 1H), 6.70 (s, 1H), 5.22–5.18 (t, *J*=6.15 Hz, 1H), 4.85 (s, 1H), 4.80 (s, 1H), 3.20–3.18 (d, *J*=5.93 Hz, 1H), 3.00–2.98 (m, 1H), 2.64–2.68 (m, 2H), 1.77 (s, 3H), 1.67 (s, 3H). <sup>13</sup>C-NMR (67 MHz, CDCl<sub>3</sub>) δ 200.7, 145.1, 143.7, 141.3, 135.3, 132.7, 129.3, 129.1, 127.6, 113.1, 72.5, 55.1, 44.3, 29.4, 20.9, 15.8. IR (film) 3435, 1659 cm<sup>-1</sup>. HRMS calculated for C<sub>17</sub>H<sub>19</sub>BrO<sub>2</sub>Na 357.0466, found 357.0466.

**Anti-alcohol 3b.** Prepared as for **3a**. The desired alcohol **3b** was obtained as a colorless oil in 58% yield (3.89 g, 11.6 mmol) from 3.00 g (20.0 mmol) of (*S*)-(+)-carvone. <sup>1</sup>H-NMR (270 MHz, CDCl<sub>3</sub>) δ 7.51 (s, 1H), 7.35–7.31 (m, 1H), 7.23–7.20 (t, *J*=7.79 Hz, 1H), 6.71–6.68 (m, 1H), 4.91–4.89 (d, *J*=6.38 Hz, 2H), 4.81–4.76 (dd, *J*=8.60, 3.50 Hz, 1H), 3.22 (d, *J*=8.86 Hz, 1H), 2.94–2.85 (m, 2H), 2.40–2.43 (m, 2H), 1.74 (s, 3H), 1.53 (s, 3H). <sup>13</sup>C-NMR (67 MHz, CDCl<sub>3</sub>) δ 202.50, 145.91, 144.64, 143.92, 135.95, 130.90, 130.50, 129.83, 129.61, 126.20, 122.04, 114.66, 77.34, 77.02, 76.71, 73.94, 53.62, 44.35, 31.26, 19.05, 15.63. Anal. (C<sub>17</sub>H<sub>19</sub>BrO<sub>2</sub>) C 60.94, H 5.66.

**Anti-alcohol 3c.** Prepared as for **3a**. The desired alcohol **3c** was obtained as a colorless oil in 75% yield (8.17 g, 25.1 mmol) from 5.00 g (33.2 mmol) of (*S*)-(+)-carvone. <sup>1</sup>H-NMR (270 MHz, CDCl<sub>3</sub>) δ 7.66–7.63 (d, 1H), 7.38–7.36 (d, 1H), 7.28–7.25 (t, 1H), 6.71–6.69 (m, 1H), 5.24–5.21 (dd, *J*=7.32 Hz, 4.55 Hz, 1H), 4.89–4.87 (m, 2H), 3.28–3.25 (d, *J*=7.32 Hz, 1H), 3.05–3.00 (dd, *J*=9.20, 4.55 Hz, 2H), 2.87–2.79 (m, 1H), 2.53–2.52 (m, 1H), 1.74 (s, 1H), 1.39 (s, 3H). <sup>13</sup>C-NMR (67 MHz, CDCl<sub>3</sub>) δ 202.50, 145.91, 144.64, 143.92, 135.95, 130.90, 130.50, 129.83, 129.61, 126.20, 122.04, 114.66, 77.34, 77.02, 76.71, 73.94, 53.62, 44.35, 31.26, 19.05, 15.63. Anal. (C<sub>17</sub>H<sub>18</sub>Cl<sub>2</sub>O<sub>2</sub>) C 62.65, H 5.64.

**Anti-alcohol 3d.** Prepared as for **3a**. The desired alcohol **3d** was obtained as a white solid in 66% yield (7.13 g, 21.9 mmol) from 5.00 g (33.2 mmol) of (*S*)-(+)-carvone; mp 110–112 °C; <sup>1</sup>H-NMR (300 MHz, CDCl<sub>3</sub>) δ 7.65 (d, 1H), 7.31–7.24 (m, 2H), 6.74–6.65 (m, 1H), 5.15–5.08 (dd, *J*=7.32, 4.75 Hz, 1H), 4.88 (s, 1H), 3.26 (d, *J*=7.32 Hz, 1H), 3.01–2.95 (dd, *J*=4.75, 9.3 Hz, 1H), 2.89–2.79 (m, 1H), 2.49 (m, 2H), 1.74 (s, 6H). <sup>13</sup>C-NMR (75 MHz, CDCl<sub>3</sub>) δ 200.65, 145.04, 144.81, 138.07, 135.55, 133.51, 133.15, 130.29, 128.92, 126.66, 113.62, 77.46, 77.04, 76.61, 69.46, 52.83, 43.19, 30.52, 19.12, 16.07.

**Anti-alcohol 3e.** Prepared as above for **3a**. The desired alcohol **3e** was obtained in 65% yield as a solid (2.22 g, 7.25 mmol) from 1.96 g (13.1 mmol) of (*S*)-(+)-carvone; mp 123-124 °C; <sup>1</sup>H NMR (300 MHz, CDCl<sub>3</sub>) δ 8.27 (d, *J* = 7.6 Hz, 1H), 8.13 (d, *J* = 7.5 Hz, 0H), 7.94 – 7.78 (m, 3H), 7.62 (d, *J* = 7.2 Hz, 1H), 7.60 – 7.41 (m, 5H), 6.72 (s, 1H), 5.58 (t, *J* = 6.1 Hz, 1H), 5.16 (s, 1H), 4.82 (d, *J* = 18.7 Hz, 2H), 3.38 (d, *J* = 6.5 Hz, 1H), 3.30 – 3.20 (m, 1H), 2.72 – 2.61 (m, 1H), 2.61 – 2.32 (m, 2H), 1.84 (d, *J* = 1.4 Hz, 3H), 1.61 (s, 3H). <sup>13</sup>C-NMR (75 MHz, CDCl<sub>3</sub>) δ 201.86, 145.62, 143.77, 137.80, 135.55, 131.34, 128.85, 128.75, 126.52, 126.05, 125.59, 125.50, 123.84, 113.38, 71.11, 63.87, 44.66, 29.39, 21.09, 16.16. Anal. (C<sub>21</sub>H<sub>22</sub>O<sub>2</sub>) C 82.23, H, 7.36.

**Anti-alcohol 3f.** Prepared as above for **3a**. The desired alcohol **3f** was obtained in 28 % yield as an oil (1.92 g, 7.5 mmol) from 4.00 g (26.6 mmol) of (*S*)-(+)-carvone. <sup>1</sup>H NMR (300 MHz, CDCl<sub>3</sub>) δ 8.50 (d, *J* = 4.8 Hz, 1H), 7.68 (td, *J* = 1.7, 7.7 Hz, 1H), 7.51 (d, *J* = 7.6 Hz, 1H), 7.13 (dd, *J* = 4.9, 7.4 Hz, 1H), 6.74 – 6.65 (m, 1H), 4.94 (dd, *J* = 10.4, 11.8 Hz, 2H), 4.84 (d, *J* = 7.9 Hz, 1H), 3.90 (d, *J* = 9.1 Hz, 1H), 3.50 (dd, *J* = 2.1, 12.4 Hz, 1H), 3.13 (ddd, *J* = 5.1, 10.5, 12.4 Hz, 1H), 2.65 – 2.47 (m, 1H), 2.39 (dt, *J* = 5.2, 9.5 Hz, 1H), 1.85 (s, 3H), 1.68 (s, 3H). <sup>13</sup>C-NMR (75 MHz, CDCl<sub>3</sub>) δ 200.91, 163.01, 148.18, 145.60, 144.46, 136.58, 135.88, 121.65, 119.69, 114.48, 72.07, 54.52, 46.27, 31.26, 19.12, 15.84. Anal. (C<sub>16</sub>H<sub>19</sub>NO<sub>2</sub>) C 74.45, H, 7.50.

**Anti-alcohol 3g.** Prepared as for **3a**. The desired alcohol **3g** was obtained as an oil in 47% yield (1.15 g, 4.7 mmol) from 1.5 g (10.0 mmol) of (*S*)-(+)-carvone. <sup>1</sup>H-NMR (300 MHz, CDCl<sub>3</sub>) δ 7.30 (dd, *J* = 0.8, 1.8 Hz, 1H), 6.78 (ddd, *J* = 1.3, 2.4, 6.1 Hz, 1H), 6.29 (dd, *J* = 1.8, 3.2 Hz, 1H), 6.16 (d, *J* = 3.3 Hz, 1H), 5.20 (d, *J* = 10.9 Hz, 1H), 4.91 – 4.83 (m, 1H), 4.75 (dd, *J* = 4.5, 11.0 Hz, 2H), 2.95 (dd, *J* = 4.4, 12.8 Hz, 1H), 2.64 – 2.50 (m, 1H), 2.50 – 2.34 (m, 1H), 2.33 – 2.19 (m, 1H), 1.81 (dt, *J* = 1.3, 2.4 Hz, 3H), 1.74 (s, 4H). <sup>13</sup>C-NMR (75 MHz, CDCl<sub>3</sub>) δ 202.69, 154.94, 154.81, 144.03, 141.68, 135.78, 114.37, 110.23, 108.17, 68.24, 52.10, 45.29, 31.17, 18.74, 15.74. Anal. (C<sub>15</sub>H<sub>18</sub>O<sub>3</sub>) C 73.39, H, 7.43.

**Anti-alcohol 3h.** Prepared as for **3a**. The desired alcohol **3h** was obtained in 50% yield as an oil (1.79 g, 6.52 mmol) from 1.96 g (13.1 mmol) of (*S*)-(+)-carvone. <sup>1</sup>H-NMR (300 MHz, CDCl<sub>3</sub>) δ 7.35 (td, *J* = 1.7, 7.6 Hz, 1H), 7.30-7.14 (m, 1H), 7.07 (dt, *J* = 3.8, 7.5 Hz, 1H), 6.96 (ddd, *J* = 1.2, 8.2, 10.6 Hz, 1H), 6.72 (ddd, *J* = 1.4, 3.6, 4.9 Hz, 1H), 5.39 (dd, *J* = 5.1, 8.1 Hz, 1H), 4.71 (dd, *J* = 12.7, 14.1 Hz, 2H), 4.12 (d, *J* = 8.2 Hz, 1H), 3.03 (dd, *J* = 5.1, 9.8 Hz, 1H), 2.84 – 2.68 (m, 1H), 2.51 – 2.25 (m, 2H), 1.77 (s, 3H), 1.58 (s, 3H). <sup>13</sup>C-NMR (75 MHz, CDCl<sub>3</sub>) δ 202.01, 161.92, 158.66, 145.11, 135.90, 129.28, 129.16, 129.11, 128.99, 124.07, 115.49, 115.19, 113.26, 67.87, 53.89, 43.54, 30.52, 19.83, 16.04. Anal. (C<sub>17</sub>H<sub>19</sub>FO<sub>2</sub>) C 74.70, H 7.03.

**Glycolate 4a.** To a stirring solution of alcohol **3a** (8.65 g, 25.80 mmol) in anhydrous DMF (75 mL) was added Ag<sub>2</sub>O (9.00 g, 38.7 mmol, 1.5 eq), followed by dropwise addition of ethyl bromoacetate (6.46 g, 38.7 mmol, 1.5 eq) at rt. After stirring ~10 min, 2,6-lutidine (4.15 g, 38.7 mmol) was added via syringe pump (~2 mL/h) and stirring was continued for 24 h at rt. The crude mixture was then filtered through a short silica gel column eluted with diethyl ether (100 mL). The filtrate was washed with 3N HCl (100 mL) and extracted with hexane (3x60 mL). The combined extracts were washed sequentially with saturated aqueous NaHCO<sub>3</sub> and brine, then dried over MgSO<sub>4</sub>, and concentrated in vacuo. The crude product was purified via flash chromatography over silica gel (20:80 EtOAc/hexanes) to deliver glycolate **4a** as a yellow oil in 77 % yield (8.47 g, 20.1 mmol). <sup>1</sup>H NMR (300 MHz, CDCl<sub>3</sub>) δ 7.57 (dd, *J* = 1.7, 7.8 Hz, 1H),

7.48 (dd,  $J = 1.1, 8.0$  Hz, 1H), 7.36 (t,  $J = 7.5$  Hz, 1H), 7.23 – 7.10 (m, 1H), 6.69 (s, 1H), 5.45 (d,  $J = 7.0$  Hz, 1H), 4.71 (dd,  $J = 8.1, 9.3$  Hz, 3H), 4.33 – 4.14 (m, 3H), 4.02 (d,  $J = 16.4$  Hz, 1H), 3.84 (d,  $J = 16.4$  Hz, 1H), 3.33 (s, 1H), 3.08 – 2.89 (m, 2H), 2.45 (d,  $J = 19.3$  Hz, 1H), 1.75 (d,  $J = 1.4$  Hz, 3H), 1.57 (s, 3H), 1.37 – 1.21 (m, 3H).  $^{13}\text{C}$ -NMR (75 MHz,  $\text{CDCl}_3$ ) 198.3, 169.9, 141.7, 129.8, 129.0, 128.8, 128.1, 127.6, 112.2, 80.7, 77.6, 77.1, 76.6, 65.6, 64.9, 60.7, 55.4, 43.5, 28.4, 21.4, 16.3, 14.2. IR (film) 1750, 1671  $\text{cm}^{-1}$ . HRMS Calcd for  $\text{C}_{21}\text{H}_{25}\text{BrNaO}_4$ : 443.0834, found 443.0830.

**Glycolate 4b.** Prepared as for **4a**. Glycolate **4b** was obtained as a colorless oil in 77% yield (1.56 g, 3.70 mmol) from 1.61 g (4.80 mmol) of alcohol **3b**.  $^1\text{H}$ -NMR (400 MHz,  $\text{CDCl}_3$ )  $\delta$  7.44 – 7.34 (m, 2H), 7.20 (q,  $J = 7.7$  Hz, 2H), 6.69 (s, 1H), 4.89 (d,  $J = 7.0$  Hz, 1H), 4.74 (s, 1H), 4.67 (s, 1H), 4.26 – 4.13 (m, 2H), 4.08 (d,  $J = 16.6$  Hz, 1H), 3.84 (d,  $J = 16.6$  Hz, 1H), 3.25 (s, 1H), 3.04 – 2.90 (m, 1H), 2.80 (dd,  $J = 4.0, 7.0$  Hz, 1H), 2.44 (d,  $J = 19.6$  Hz, 1H), 1.71 (s, 4H), 1.58 (d,  $J = 14.2$  Hz, 6H), 1.27 (t,  $J = 7.1$  Hz, 6H).  $^{13}\text{C}$ -NMR (75 MHz,  $\text{CDCl}_3$ ) 197.8, 170.1, 146.1, 143.4, 138.0, 135.5, 132.6, 129.6, 129.4, 127.6, 112.3, 79.4, 72.6, 68.0, 66.2, 61.0, 55.7, 41.5, 28.2, 21.2, 16.3, 14.3.

**Glycolate 4c.** Prepared as for **4a**. Glycolate **4c** was obtained as a colorless oil in 83% yield (7.41 g, 18.0 mmol) from 7.06 g of alcohol **3c** (21.7 mmol).  $^1\text{H}$  NMR (400 MHz,  $\text{CDCl}_3$ )  $\delta$  7.55 (dd,  $J = 1.5, 7.9$  Hz, 1H), 7.45 (dd,  $J = 1.6, 7.9$  Hz, 1H), 7.30 (dd,  $J = 4.7, 12.7$  Hz, 2H), 6.67 (s, 1H), 5.22 (d,  $J = 5.7$  Hz, 1H), 4.83 (dd,  $J = 7.9, 9.2$  Hz, 2H), 4.28 – 4.10 (m, 2H), 4.03 (d,  $J = 16.3$  Hz, 1H), 3.73 (d,  $J = 16.3$  Hz, 1H), 2.99 (t,  $J = 5.6$  Hz, 1H), 2.89 – 2.69 (m, 2H), 2.43 (d,  $J = 18.5$  Hz, 1H), 1.82 (s, 3H), 1.73 (s, 3H), 1.27 (t,  $J = 7.1$  Hz, 3H).  $^{13}\text{C}$  NMR (101 MHz,  $\text{CDCl}_3$ )  $\delta$  197.71, 169.62, 145.56, 142.22, 139.41, 135.71, 132.88, 131.37, 129.87, 127.68, 127.47, 112.89, 79.45, 77.35, 77.03, 76.71, 66.40, 60.83, 54.26, 44.36, 28.82, 20.74, 16.19, 14.18.

**Glycolate 4d.** Prepared as for **4a**. Glycolate **4d** was obtained as a colorless oil in 80% yield (9.60 g, 23.3 mmol) from 9.48 g (29.2 mmol) of alcohol **3d**.  $^1\text{H}$ -NMR (270 MHz,  $\text{CDCl}_3$ )  $\delta$  7.53–7.49 (d, 1H), 7.44–7.40 (d, 1H), 7.30–7.26 (m, 1H), 6.64 (s, 1H), 5.20–5.18 (d, 1H), 4.81–4.76 (d, 2H), 4.20–4.11 (m, 2H), 4.03–3.97 (d,  $J = 16.03$  Hz, 1H), 3.72–3.66 (d,  $J = 16.03$  Hz, 1H), 3.31–3.25 (m, 1H), 2.94–2.90 (m, 2H), 2.44–2.34 (m, 1H), 1.72, (s, 3H), 1.48 (s, 3H), 1.31–1.26 (t,  $J = 7.07$  Hz, 3H).  $^{13}\text{C}$ -NMR (101 MHz,  $\text{CDCl}_3$ )  $\delta$  198.12, 170.14, 145.91, 143.38, 141.50, 135.24, 131.18, 130.27, 129.96, 125.78, 122.56, 112.21, 80.74, 77.33, 77.01, 76.70, 66.00, 60.85, 57.54, 41.25, 29.71, 28.11, 21.23, 16.14, 14.16.

**Glycolate 4e.** Prepared as for **4a**. Glycolate **4e** was obtained as an oil in 25% yield (8.17 g, 25.13 mmol) from *anti* alcohol **1g** (3.27 mmol).  $^1\text{H}$ -NMR (300 MHz,  $\text{CDCl}_3$ )  $\delta$  8.09 (d,  $J = 7.6$  Hz, 1H), 7.91 – 7.83 (m, 1H), 7.79 (d,  $J = 8.2$  Hz, 1H), 7.60 (d,  $J = 7.0$  Hz, 1H), 7.56 – 7.41 (m, 3H), 6.75 (s, 1H), 5.86 (d,  $J = 5.1$  Hz, 1H), 4.59 (s, 2H), 4.13 (d,  $J = 16.4$  Hz, 1H), 3.92 (d,  $J = 10.3$  Hz, 1H), 3.70 (s, 3H), 3.28 (dd,  $J = 4.4, 9.8$  Hz, 1H), 3.09 – 2.90 (m, 2H), 2.47 – 2.31 (m, 1H), 1.72 (s, 3H), 1.27 (s, 3H).  $^{13}\text{C}$ -NMR (75 MHz,  $\text{CDCl}_3$ )  $\delta$  198.92, 170.89, 146.63, 144.20, 135.41, 134.25, 133.96, 131.11, 129.22, 128.72, 126.54, 125.73, 125.26, 125.22, 122.98, 112.11, 79.47, 66.40, 55.66, 51.85, 41.25, 29.00, 20.97, 16.37. HRMS Calcd for  $\text{C}_{24}\text{H}_{26}\text{O}_4\text{Na}$ : 401.1729, found: 401.1719.

**Glycolate 4f.** Prepared as for **4a**. Glycolate **4f** was obtained as an oil in 86% yield (1.43 g, 4.34 mmol) from 1.3 g (5.05 mmol) of alcohol **3f**. <sup>1</sup>H-NMR (300 MHz, CDCl<sub>3</sub>) δ 8.50 (d, J = 4.8, 1H), 7.70 (dt, J = 7.0, 20.6 Hz, 2H), 7.23 – 7.10 (m, 1H), 6.63 (s, 1H), 4.83 (s, 1H), 4.75 (d, J = 5.2 Hz, 1H), 4.20 (d, J = 16.2 Hz, 1H), 3.93 (d, J = 16.2 Hz, 1H), 3.69 (s, 3H), 3.17 (dd, J = 5.2, 8.0 Hz, 1H), 2.89 – 2.70 (m, 1H), 2.50 (m, 2H), 1.80 – 1.71 (m, 6H). <sup>13</sup>C-NMR (75 MHz, CDCl<sub>3</sub>) δ 197.99, 170.30, 160.59, 148.74, 145.81, 142.32, 136.52, 135.60, 122.39, 121.32, 113.28, 83.42, 67.59, 55.15, 51.80, 44.20, 29.28, 20.03, 16.15. Anal. (C<sub>19</sub>H<sub>23</sub>NO<sub>4</sub>) C 68.99, H 7.09.

**Glycolate 4g.** Prepared as for **4a**. Glycolate **4g** was obtained as an oil in 48% yield (679 mg, 2.13 mmol) from 1.1 g (4.46 mmol) of alcohol **3g**. <sup>1</sup>H-NMR (300 MHz, CDCl<sub>3</sub>) δ 7.40 (dd, J = 0.7 Hz, 1.7, 1H), 6.68 – 6.59 (m, 1H), 6.33 – 6.20 (m, 2H), 4.88 (d, J = 7.6 Hz, 1H), 4.74 (d, J = 1.2 Hz, 1H), 4.66 (s, 1H), 4.12 (d, J = 16.8 Hz, 1H), 3.96 – 3.87 (m, 1H), 3.73 – 3.66 (m, 3H), 3.21 (dd, J = 4.4, 9.4 Hz, 1H), 3.09 (dd, J = 4.4, 7.5 Hz, 1H), 2.98 – 2.81 (m, 1H), 2.42 (ddd, J = 2.5, 5.6, 19.6 Hz, 1H), 1.68 (s, 7H). <sup>13</sup>C-NMR (75 MHz, CDCl<sub>3</sub>) δ 198.03, 171.00, 151.32, 145.97, 143.28, 143.06, 112.17, 110.34, 110.18, 74.74, 65.50, 54.79, 51.92, 41.73, 28.02, 21.52, 16.28. Anal. (C<sub>18</sub>H<sub>22</sub>O<sub>5</sub>) C 67.71, H 6.96.

**Glycolate 4h.** Prepared as for **4a**. Glycolate **4h** was obtained as an oil in 19 % yield (0.25 g, 0.71 mmol) from 1.05 g of alcohol **3h** (3.8 mmol). <sup>1</sup>H NMR (300 MHz, CDCl<sub>3</sub>) δ 7.44 (td, J = 1.8, 7.5 Hz, 1H), 7.31 – 7.21 (m, 2H), 7.15 (t, J = 7.0 Hz, 1H), 6.97 (dd, J = 8.4, 10.1 Hz, 1H), 6.66 (s, 1H), 5.26 (d, J = 7.6 Hz, 1H), 4.68 (d, J = 11.6 Hz, 2H), 4.08 (d, J = 16.5 Hz, 1H), 3.87 (d, J = 16.5 Hz, 1H), 3.73 (s, 3H), 3.31 (s, 1H), 3.06 – 2.80 (m, 2H), 2.43 (d, J = 19.6 Hz, 1H), 1.72 (s, 3H), 1.59 (s, 3H). <sup>13</sup>C-NMR (75 MHz, CDCl<sub>3</sub>) δ 198.18, 170.72, 162.47, 159.21, 146.07, 143.16, 135.39, 129.84, 128.75, 126.14, 125.97, 124.48, 124.43, 115.46, 115.18, 112.25, 74.74, 66.05, 56.64, 51.90, 41.50, 27.91, 21.48, 16.24. Anal. (C<sub>20</sub>H<sub>23</sub>FO<sub>4</sub>) C 68.98, H 6.61.

**Isobenzofuran 5a.** To a solution of glycolate **4a** (4.13 g, 9.80 mmol) in dry THF (100 mL) was added KHMDS (2.35 g, 11.8 mmol, 1.1 eq, 0.5 M soln. in toluene) quickly at -78 °C, followed immediately by rapid addition of 1.2 eq HOAc (0.71 g, 11.8 mmol). The reaction mixture was allowed to warm to rt, then water (100 mL) was added. The organic layer was extracted with ether (3 x 60 mL). The combined organic extracts were washed with brine and dried over MgSO<sub>4</sub>, filtered and concentrated in vacuo. The crude product was purified via flash chromatography over silica gel (10:90 EtOAc/hexanes) to yield cycloaldol product **5a** as a colorless oil in 80% yield (3.30 g, 7.84 mmol). <sup>1</sup>H NMR (400 MHz, CDCl<sub>3</sub>) δ 8.28 (dd, J = 1.6, 7.9 Hz, 1H), 7.52 (d, J = 8.0, 1H), 7.43 (t, J = 7.6, 1H), 7.22 – 7.14 (m, 1H), 5.78 (s, 1H), 5.24 (d, J = 8.8 Hz, 1H), 4.84 (d, J = 3.3 Hz, 2H), 4.46 (s, 1H), 4.37 – 4.22 (m, 2H), 3.08 (s, 1H), 2.76 (dd, J = 5.3, 8.8 Hz, 1H), 2.54 (d, J = 15.8 Hz, 1H), 2.31 (d, J = 4.6 Hz, 2H), 1.86 (s, 3H), 1.58 (s, 3H), 1.35 (t, J = 7.1 Hz, 3H). <sup>13</sup>C-NMR (100 MHz, CDCl<sub>3</sub>) 171.0, 147.0, 139.4, 132.9, 132.4, 130.4, 129.7, 128.3, 125.6, 123.9, 112.2, 82.6, 81.9, 80.7, 61.3, 55.5, 39.1, 27.7, 21.4, 17.7, 14.2. IR (film) 3536, 1743 cm<sup>-1</sup>. HRMS Calcd for C<sub>21</sub>H<sub>25</sub>BrO<sub>4</sub>Na<sup>+</sup>: 443.0834, found 443.0834.

**Isobenzofuran 5b.** Prepared as for **5a**. Isobenzofuran **5b** was obtained as a white solid in 73% yield (0.56 g, 1.34 mmol) from 0.77 g (1.83 mmol) of glycolate **4b**. mp 131-136 °C; <sup>1</sup>H-NMR (400 MHz, CDCl<sub>3</sub>) δ 7.51 (s, 1H), 7.34 (d, J = 7.2 Hz, 1H), 7.20 (d, J = 7.1 Hz, 1H), 7.08

(d,  $J = 7.7$  Hz, 1H), 5.70 (s, 1H), 5.60 (s, 1H), 4.64 (s, 1H), 4.30 (d,  $J = 4.0$  Hz, 2H), 4.20 (d,  $J = 15.9$  Hz, 2H), 3.12 (s, 1H), 2.74 – 2.58 (m, 1H), 2.46 – 2.29 (m, 1H), 2.00–1.77 (m, 6H), 1.61 (s, 1H), 1.42 – 1.26 (m, 7H).  $^{13}\text{C}$ -NMR (100 MHz,  $\text{CDCl}_3$ )  $\delta$  171.41, 145.68, 141.05, 133.43, 130.42, 130.26, 128.94, 125.89, 125.72, 121.90, 111.83, 83.50, 83.46, 82.88, 77.35, 77.03, 76.71, 61.53, 53.84, 40.35, 31.67, 19.40, 18.00, 14.15. Anal. ( $\text{C}_{21}\text{H}_{25}\text{BrO}_4$ ) C 60.13, H 6.04.

**Isobenzofuran 5c.** Prepared as for **5a**. Isobenzofuran **5c** was obtained as a pale yellow oil in 77% yield (2.61 g, 6.34 mmol) from 3.39 g (8.24 mmol) of glycolate **4c**.  $^1\text{H}$  NMR (270 MHz,  $\text{CDCl}_3$ )  $\delta$  8.22 (dd,  $J = 1.7, 7.8$  Hz, 1H), 7.38 (dd,  $J = 1.7, 7.9$  Hz, 1H), 7.27 (t,  $J = 7.8$  Hz, 1H), 5.70 (s, 1H), 5.30 (d,  $J = 8.2$  Hz, 1H), 4.80 (s, 3H), 4.42 (s, 1H), 4.25 (qd,  $J = 2.7, 7.1$  Hz, 2H), 3.06 (s, 1H), 2.74 – 2.59 (m, 1H), 2.27 (s, 3H), 1.79 (s, 3H), 1.53 (s, 3H), 1.29 (t,  $J = 7.1$  Hz, 3H).  $^{13}\text{C}$ -NMR (67 MHz,  $\text{CDCl}_3$ ) 171.1, 146.7, 140.8, 132.9, 132.6, 131.5, 130.1, 128.4, 128.1, 125.7, 112.5, 81.9, 80.9, 80.7, 61.4, 55.4, 39.7, 27.7, 21.3, 17.7, 14.2.

**Isobenzofuran 5d.** Prepared as for **5a**. Isobenzofuran **5d** was obtained as a pale yellow oil in 74% yield (3.50 g, 8.51 mmol) from 4.73 g (11.5 mmol) of glycolate **4d**.  $^1\text{H}$  NMR (300 MHz,  $\text{CDCl}_3$ )  $\delta$  8.27 (d,  $J = 9.1$ , 1H), 7.41 – 7.34 (m, 2H), 5.77 (s, 1H), 5.26 (d,  $J = 8.3$  Hz, 1H), 4.85 (s, 2H), 4.46 (s, 1H), 4.31 (ddd,  $J = 5.6, 8.3, 16.5$  Hz, 3H), 3.16 (s, 1H), 2.69 (dd,  $J = 5.9, 8.3$  Hz, 1H), 2.36 (m, 4H), 1.85 (d,  $J = 1.5$  Hz, 4H), 1.58 (d,  $J = 6.7$  Hz, 9H), 1.42 – 1.21 (m, 9H).  $^{13}\text{C}$  NMR (101 MHz,  $\text{CDCl}_3$ )  $\delta$  171.10, 146.70, 136.85, 134.34, 132.78, 131.21, 128.77, 128.06, 126.96, 125.72, 112.41, 81.72, 80.77, 79.71, 77.33, 77.21, 77.01, 76.70, 61.46, 59.84, 55.17, 39.68, 27.73, 21.23, 17.68, 14.13.

**Isobenzofuran 5e.** Prepared as for **5a**. Isobenzofuran **5e** was obtained in 59 % yield (0.22 g, 0.59 mmol) as an oil from 0.41 g (1.08 mmol) of glycolate **4e**.  $^1\text{H}$ -NMR (300 MHz,  $\text{CDCl}_3$ )  $\delta$  8.34 (d,  $J = 8.0$  Hz, 1H), 8.16 (d,  $J = 7.2$  Hz, 1H), 7.86 (t,  $J = 9.1$  Hz, 2H), 7.52 (dt,  $J = 6.9, 14.5$  Hz, 3H), 5.76 (s, 1H), 5.62 (d,  $J = 7.2$  Hz, 1H), 4.91 (s, 1H), 4.83 (s, 1H), 4.59 (s, 1H), 3.85 (s, 3H), 3.26 (s, 1H), 3.03 (t,  $J = 7.2$  Hz, 1H), 2.39 (dd,  $J = 6.5, 12.7$  Hz, 1H), 2.29 (s, 2H), 1.87 (s, 3H), 1.55 (s, 3H).  $^{13}\text{C}$ -NMR (75 MHz,  $\text{CDCl}_3$ )  $\delta$  172.29, 146.85, 135.72, 133.92, 133.46, 131.85, 128.99, 128.86, 126.11, 125.74, 125.63, 125.60, 125.52, 123.60, 113.03, 82.77, 81.51, 80.99, 53.68, 52.36, 42.04, 28.22, 20.68, 17.79. Anal. ( $\text{C}_{24}\text{H}_{26}\text{O}_4$ ) C 76.09, H 6.95.

**Isobenzofuran 5f.** Prepared as for **5a**. Isobenzofuran **5f** was obtained in 81 % yield (0.30 g, 0.90 mmol) as a solid from 0.36 g (1.10 mmol) of glycolate **4f**; mp 67–69 °C;  $^1\text{H}$ -NMR (300 MHz,  $\text{CDCl}_3$ )  $\delta$  8.53 (d,  $J = 4.0$  Hz, 1H), 7.64 (td,  $J = 1.8, 7.7$  Hz, 1H), 7.19 (ddd,  $J = 3.6, 6.0, 7.8$  Hz, 2H), 5.58 (d,  $J = 1.5$  Hz, 1H), 4.88 (s, 1H), 4.82 (s, 1H), 4.55 (s, 1H), 3.69 (s, 3H), 2.55 – 2.32 (m, 2H), 2.07 (d,  $J = 3.1, 2\text{H}$ ), 1.89 – 1.73 (m, 3H), 1.50 (s, 3H).  $^{13}\text{C}$ -NMR (75 MHz,  $\text{CDCl}_3$ )  $\delta$  170.36, 159.63, 149.19, 146.18, 137.80, 133.65, 125.22, 123.42, 123.23, 113.50, 87.12, 84.83, 82.53, 54.58, 52.07, 46.56, 30.98, 19.36, 17.95. Anal. ( $\text{C}_{19}\text{H}_{23}\text{NO}_4$ ) C 68.98, H 6.86.

**Methyl ester 5a.i.** To a solution of ethyl ester **5a** (0.10 g, 0.24 mmol) in 15 mL of methanol was added 0.04 g (0.28 mmol, 1.2 eq) of  $\text{K}_2\text{CO}_3$  at room temperature. The reaction mixture was stirred at rt until no starting material was observed by TLC (ca. 20 min). The mixture was then diluted with  $\text{H}_2\text{O}$  (10 mL) and extracted with  $\text{CH}_2\text{Cl}_2$  (3 x 20 mL). The combined organic extracts were then washed with brine (50 mL), extracted with  $\text{CH}_2\text{Cl}_2$  (40 mL), dried over

MgSO<sub>4</sub>, and concentrated in vacuo. The crude product was filtered through a short silica gel column (EtOAc/Hexanes 1:1) to deliver methyl ester **5a.i** as a colorless oil in 97 % yield (94.8 mg, 23.3 mmol). <sup>1</sup>H-NMR (300 MHz, CDCl<sub>3</sub>) δ 8.30 (dd, J = 1.7, 7.9 Hz, 1H), 7.54 (dd, J = 1.2, 8.0 Hz, 1H), 7.45 (t, J = 7.6 Hz, 1H), 7.24 – 7.15 (m, 1H), 5.79 (s, 1H), 5.25 (d, J = 9.2 Hz, 1H), 4.90 – 4.81 (m, 2H), 4.51 (s, 1H), 3.85 (s, 3H), 2.93 (s, 1H), 2.77 (dd, J = 4.9, 9.2 Hz, 1H), 2.66 – 2.51 (m, 1H), 2.32 (d, J = 15.0 Hz, 2H), 1.88 (d, J = 1.6 Hz, 3H), 1.58 (d, J = 5.8 Hz, 5H). <sup>13</sup>C-NMR (75 MHz, CDCl<sub>3</sub>) δ 171.54, 147.20, 139.28, 132.82, 132.46, 130.27, 129.79, 128.39, 125.67, 123.84, 112.00, 82.51, 81.76, 80.50, 77.47, 77.05, 76.62, 73.47, 55.22, 52.22, 38.31, 27.49, 21.61, 17.67. Anal. (C<sub>20</sub>H<sub>23</sub>BrO<sub>4</sub>) C 59.16, H 5.80.

**Cyclopropylmethyl ester 5a.ii.** A mixture of ethyl ester **5a** (0.14 g, 0.33 mmol), cyclopropyl methanol (2.66 mL, 33.22 mmol, 100 eq), and Bu<sub>2</sub>SnO (0.06 g, 0.24 mmol, 0.75eq) was sealed in an 8 mL microwave reaction vessel. The mixture was irradiated for 30 min. at 150 °C and 300 W with continuous stirring. The mixture was then cooled to rt, diluted with ethyl acetate (10 mL), washed with sat. NaHCO<sub>3</sub> (30 mL) and extracted with EtOAc (3x20 mL). The combined organic extracts were then washed with brine, dried over MgSO<sub>4</sub>, and concentrated in vacuo. The crude product was purified via flash chromatography over silica gel (10:90 EtOAc/hexanes) to deliver ester **5a.ii** as a colorless oil in 84% yield (0.125 g, 0.28 mmol). <sup>1</sup>H NMR (300 MHz, CDCl<sub>3</sub>) δ 8.29 (dd, J = 1.7, 7.9 Hz, 1H), 7.53 (dd, J = 1.2, 8.0 Hz, 1H), 7.43 (t, J = 7.6 Hz, 1H), 7.24 – 7.11 (m, 1H), 5.78 (s, 1H), 5.26 (d, J = 8.6 Hz, 1H), 4.85 (s, 2H), 4.49 (s, 1H), 4.16 – 3.99 (m, 2H), 3.16 (s, 1H), 2.77 (dd, J = 5.7, 8.6 Hz, 1H), 2.53 (d, J = 15.6 Hz, 1H), 2.30 (d, J = 10.1 Hz, 2H), 2.19 (s, 1H), 1.88 (d, J = 1.4 Hz, 3H), 1.59 (d, J = 6.8 Hz, 3H), 1.30 – 1.13 (m, 2H), 0.62 (dt, J = 5.4, 5.9 Hz, 2H), 0.35 (q, J = 4.7 Hz, 2H). <sup>13</sup>C-NMR (75 MHz, CDCl<sub>3</sub>) 171.0, 146.8, 139.4, 132.9, 132.4, 130.4, 129.7, 128.3, 125.7, 112.2, 82.7, 81.9, 80.7, 70.2, 55.5, 39.5, 27.8, 21.27, 17.7, 9.6, 3.4.

**Cyclopentylmethyl ester 5a.iii.** Prepared as for **5a.ii**. Ester **5a.iii** was obtained in 91% yield as an oil (0.11 g, 0.24 mmol) from 0.11 g (0.26 mmol) of ester **5a**. <sup>1</sup>H-NMR (270 MHz, CDCl<sub>3</sub>) 8.29 (d, J = 6.2 Hz, 1H), 7.53 (d, J = 8.0 Hz, 1H), 7.44 (t, J = 7.5 Hz, 1H), 7.19 (dd, J = 4.5, 10.8 Hz, 1H) 5.79 (s, 1H), 5.25 (d, J = 9.0 Hz, 1H), 4.85 (s, 2H), 4.49 (s, 1H), 4.17 – 4.04 (m, 2H), 2.99 (s, 1H), 2.76 (dd, J = 5.0, 9.1 Hz, 1H), 2.64-2.52 (m, 1H), 2.32 (d, J = 7.3 Hz, 3H), 1.89-1.74 (m, 6H), 1.68-1.54 (m, 8H), 1.39-1.26 (m, 3H). <sup>13</sup>C-NMR (67 MHz, CDCl<sub>3</sub>) 171.1, 147.1, 139.5, 132.9, 132.4, 130.3, 129.7, 128.3, 125.5, 123.8, 112.0, 82.5, 81.9, 80.6, 69.3, 55.5, 38.5, 38.3, 29.3, 27.5, 25.4, 21.5, 17.6.

**Acid 5a.iv.** To a solution of 3:2:1 THF/H<sub>2</sub>O/MeOH and ester **5a** (0.18 g, 0.43 mmol) was added 0.02 g (0.85 mmol, 2 eq) of LiOH at rt. The reaction mixture was allowed to stir at rt until no starting material was observed by TLC (~1.5 h), then acidified to pH 2 with 3N HCl. The mixture was diluted with CH<sub>2</sub>Cl<sub>2</sub> (30 mL), extracted with CH<sub>2</sub>Cl<sub>2</sub> (3 x 30 mL), washed with brine (40 mL), dried over MgSO<sub>4</sub> and concentrated in vacuo to yield a yellow foam. The crude material was eluted through a plug of silica gel (1:1 EtOAc/hexanes) to deliver acid **5a.iv** as a white solid in 95% yield (0.16 g, 0.41 mmol); mp 52-56 °C. <sup>1</sup>H-NMR (270 MHz, CDCl<sub>3</sub>) δ 8.14- 8.09 (d, J=7.86 Hz, 1H), 7.59-7.54 (d, J=8.03 Hz, 1H), 7.47-7.40 (t, J=7.55 Hz, 1H), 7.25-7.18 (dd, J=4.47, 10.85 Hz, 1H), 5.81 (s, 1H), 5.28 (s, 1H), 5.25 (d, J=8.87 Hz, 1H), 4.85 (s, 2H), 4.51 (s, 1H), 2.79-2.72 (dd, J=5.18, 8.84 Hz, 1H), 2.60-2.47 (m, 1H), 2.35-2.24 (m, 2H), 1.94 (s,

3H), 1.59 (s, 3H).  $^{13}\text{C}$ -NMR (67 MHz,  $\text{CDCl}_3$ ) 146.6, 138.6, 132.9, 132.7, 130.0, 129., 128.4, 125.9, 124.1, 112.4, 82.7, 55.6, 27.6, 21.4, 17.7. IR (film) 3450, 1638  $\text{cm}^{-1}$ .

**Diene 6a.** Preparation was carried out as above for **5a** from glycolate **4a** (3.5 g, 8.31 mmol), but the reaction mixture was allowed to stir for 5 minutes before quenching with HOAc. Purification of the crude product via flash chromatography over silica gel (10:90 EtOAc/hexanes) delivered diene **6a** as a yellow oil in 15 % yield (0.42 g, 1.27 mmol) as well as isobenzofuran **5a** in 41% yield (1.43 g, 3.41 mmol).  $^1\text{H}$ -NMR (400 MHz,  $\text{CDCl}_3$ )  $\delta$  7.64 (d,  $J$  = 6.5, 1H), 7.34 – 7.08 (m, 3H), 6.62 (s, 1H), 4.95 (s, 1H), 4.73 (s, 1H), 3.62 (s, 1H), 2.74 – 2.48 (m, 1H), 2.19 (s, 1H), 1.95 – 1.82 (m, 2H), 1.77 (s, 2H), 1.59 (s, 1H).  $^{13}\text{C}$ -NMR (101 MHz,  $\text{CDCl}_3$ )  $\delta$  189.40, 145.37, 141.23, 139.35, 136.66, 136.31, 134.83, 132.82, 129.65, 129.62, 127.04, 125.00, 114.21, 77.35, 77.03, 76.71, 43.88, 29.72, 29.18, 21.78, 16.34.

**Diene 6e.** Prepared as for **6a**. Diene **6e** was obtained in 33% yield (0.10 g, 0.33 mmol) as a solid from 0.41 g (1.08 mmol) of glycolate **4e**; mp 113-115  $^\circ\text{C}$ ;  $^1\text{H}$ -NMR (300 MHz,  $\text{CDCl}_3$ )  $\delta$  8.34 (d,  $J$  = 8.0 Hz, 1H), 8.16 (d,  $J$  = 7.2 Hz, 1H), 7.86 (dd,  $J$  = 8.2, 10.1 Hz, 2H), 7.61 – 7.42 (m, 3H), 5.76 (s, 1H), 5.62 (d,  $J$  = 7.2 Hz, 1H), 4.87 (d,  $J$  = 26.1 Hz, 2H), 4.59 (s, 1H), 3.83 (s, 3H), 3.26 (s, 1H), 3.03 (t,  $J$  = 7.2 Hz, 1H), 2.39 (dd,  $J$  = 6.5, 12.7 Hz, 1H), 2.34 – 2.21 (m, 2H), 1.87 (s, 3H), 1.55 (s, 3H).  $^{13}\text{C}$ -NMR (75 MHz,  $\text{CDCl}_3$ )  $\delta$  189.94, 146.02, 141.49, 140.18, 136.87, 133.88, 133.65, 133.24, 132.32, 128.97, 128.70, 126.58, 126.32, 126.02, 125.37, 124.92, 114.15, 44.28, 29.57, 22.06, 16.59. Anal: ( $\text{C}_{22}\text{H}_{22}\text{O}$ ) C 87.78, H 7.26.

**Diene 6g.** Prepared as for **6a**. Diene **6g** was obtained in 41% yield (0.05 g, 0.19 mmol) as a solid from 0.15 g (0.46 mmol) of glycolate **4g**; mp 71-73  $^\circ\text{C}$ ;  $^1\text{H}$ -NMR (300 MHz,  $\text{CDCl}_3$ )  $\delta$  7.50 (d,  $J$  = 1.6 Hz, 1H), 7.42 (s, 1H), 6.70 – 6.61 (m, 1H), 6.58 (d,  $J$  = 3.4 Hz, 1H), 6.47 (dd,  $J$  = 1.8, 3.4 Hz, 1H), 4.87 – 4.74 (m, 1H), 4.65 (s, 1H), 4.37 (d,  $J$  = 6.1 Hz, 1H), 2.77 – 2.45 (m, 2H), 1.86 (s, 3H), 1.81 (s, 3H).  $^{13}\text{C}$ -NMR (75 MHz,  $\text{CDCl}_3$ )  $\delta$  188.77, 152.31, 145.57, 144.27, 141.82, 136.68, 134.43, 122.87, 116.05, 112.65, 112.24, 43.29, 28.94, 22.11, 16.77. Anal. ( $\text{C}_{16}\text{H}_{18}\text{O}_2$ ) C 79.23, H 7.24.

**Diene 6h.** Prepared as for **10a**. Diene **6h** was obtained in 45% yield (0.07 g, 0.26 mmol) as an oil from 0.20 g (0.58 mmol) of glycolate **4h**.  $^1\text{H}$  NMR (300 MHz,  $\text{CDCl}_3$ )  $\delta$  7.68 (s, 1H), 7.33 (dt,  $J$  = 4.5, 14.2 Hz, 2H), 7.12 (dd,  $J$  = 8.3, 16.2 Hz, 2H), 6.67 – 6.59 (m, 1H), 4.96 (s, 1H), 4.74 (s, 1H), 3.75 (s, 1H), 2.72 – 2.50 (m, 2H), 1.90 (s, 3H), 1.81 (s, 3H).  $^{13}\text{C}$ -NMR (75 MHz,  $\text{CDCl}_3$ )  $\delta$  189.45, 162.81, 159.50, 145.36, 141.33, 140.24, 136.68, 130.42, 130.31, 129.93, 129.90, 128.54, 128.49, 124.03, 123.98, 123.86, 115.88, 115.59, 114.30, 44.28, 29.24, 21.92, 16.50. Anal. ( $\text{C}_{18}\text{H}_{19}\text{FO}$ ) C 79.58, H 6.72.

**Enone 8a.** Isobenzofuran **5a** (0.37 g, 0.87 mmol) in anhydrous  $\text{CH}_2\text{Cl}_2$  (9.0 mL) was added to a mixture of finely ground pyridinium chlorochromate (2.00 g, 8.70 mmol) and silica gel (2.00 g) in dry  $\text{CH}_2\text{Cl}_2$  (20.0 mL) at rt. The reaction mixture was stirred at rt for 24 h. The crude solution was then filtered through a short silica gel column with ether (100 mL) and concentrated in vacuo. The dark brown residue was purified via flash chromatography over silica gel (15/85, EtOAc/hexanes) to deliver enone **6a** as a white solid in 55 % yield (0.20 g, 0.48 mmol) mp 126-127  $^\circ\text{C}$ ;  $^1\text{H}$  NMR (300 MHz,  $\text{CDCl}_3$ )  $\delta$  8.08 – 7.98 (m, 1H), 7.49 (dd,  $J$  = 1.0, 8.1 Hz, 1H), 7.41

(t,  $J$  = 7.6 Hz, 1H), 7.18 (td,  $J$  = 1.7, 8.0 Hz, 1H), 5.28 (s, 1H), 5.21 (d,  $J$  = 10.0 Hz, 1H), 4.74 (s, 1H), 4.47 (s, 1H), 4.40 – 4.25 (m, 2H), 3.26 (t,  $J$  = 10.3 Hz, 1H), 2.93 – 2.70 (m, 1H), 2.54 – 2.30 (m, 2H), 2.01 – 1.87 (m, 3H), 1.58 (d,  $J$  = 8.2 Hz, 1H), 1.36 (q,  $J$  = 7.1 Hz, 3H), 1.27 (s, 3H).  $^{13}\text{C}$ -NMR (75 MHz,  $\text{CDCl}_3$ ) 198.0, 171.0, 146.0, 142.0, 138.0, 132.9, 130.4, 130.0, 129.7, 128.3, 125.6, 114.2, 85.2, 78.5, 62.3, 51.5, 47.5, 42.0, 18.5, 14.7, 12.2. IR (film) 1743, 1674  $\text{cm}^{-1}$ . HRMS Calcd for  $\text{C}_{21}\text{H}_{24}\text{BrO}_4^+$ : 419.0858, found 419.0836. Anal. ( $\text{C}_{21}\text{H}_{23}\text{BrO}_4$ ) C 60.31, H 5.47.

**Enone 8b.** Prepared as for **8a**. Enone **8b** was obtained as a white foam in 54 % yield (0.07 g, 0.16 mmol) from 0.12g (0.29 mmol) of isobenzofuran **5b**.  $^1\text{H}$  NMR (300 MHz,  $\text{CDCl}_3$ )  $\delta$  7.42 (d,  $J$  = 8.8 Hz, 1H), 7.18 (dd,  $J$  = 5.0, 10.5 Hz, 2H), 6.98 (d,  $J$  = 7.8 Hz, 1H), 5.61 (d,  $J$  = 8.9 Hz, 1H), 5.56 (s, 1H), 4.92 (s, 1H), 4.77 (s, 1H), 4.30 (q,  $J$  = 7.1 Hz, 2H), 3.70 (s, 1H), 2.50 (dd,  $J$  = 3.9, 16.3 Hz, 1H), 2.23 (dd,  $J$  = 13.9, 16.3 Hz, 1H), 1.98 (d,  $J$  = 2.0 Hz, 3H), 1.93 – 1.80 (m, 1H), 1.61 (s, 1H), 1.53 (s, 3H), 1.35 (t,  $J$  = 7.1 Hz, 3H).  $^{13}\text{C}$ -NMR (75 MHz,  $\text{CDCl}_3$ ) 183.6, 156.0, 142.3, 132.6, 129.9, 127.9, 113.9, 85.0, 78.1, 66.6, 62.0, 58.0, 46.7, 42.4, 22.7, 18.02, 14.2, 11.4.

**Enone 8c.** Prepared as for **8a**. Enone **8c** was obtained as a white solid in 56% yield (0.22 g, 0.54 mmol) from 0.40 g (0.97 mmol) of isobenzofuran **5c**; mp 41-45  $^\circ\text{C}$ ;  $^1\text{H}$  NMR (270 MHz,  $\text{CDCl}_3$ )  $\delta$  7.93 (dd,  $J$  = 1.6, 7.8 Hz, 1H), 7.38 (dd,  $J$  = 1.7, 7.9 Hz, 1H), 7.25 (t,  $J$  = 7.9 Hz, 1H), 5.31 – 5.10 (m, 2H), 4.61 (s, 1H), 4.47 – 4.36 (m, 1H), 4.25 (qd,  $J$  = 1.3, 7.1 Hz, 2H), 3.14 (d,  $J$  = 10.4 Hz, 1H), 2.84 – 2.63 (m, 1H), 2.48 – 2.21 (m, 2H), 1.86 (dd,  $J$  = 0.9, 2.5 Hz, 3H), 1.30 (t,  $J$  = 7.1 Hz, 3H), 1.21 (s, 4H).  $^{13}\text{C}$ -NMR (67 MHz,  $\text{CDCl}_3$ ) 197.5, 169.8, 154.7, 142.1, 139.0, 132.5, 129.9, 127.4, 113.4, 82.6, 62.0, 50.4, 46.9, 42.3, 18.2, 14.1, 11.1.

**Enone 8d.** Prepared as for **8a**. Enone **8d** was obtained as a white solid in 67% yield (0.11 g, 0.27 mmol) from 0.17 g (0.41 mmol) of isobenzofuran **5d**; mp 96-100  $^\circ\text{C}$ ;  $^1\text{H}$  NMR (270 MHz,  $\text{CDCl}_3$ )  $\delta$  7.93 (dd,  $J$  = 1.6, 7.8 Hz, 1H), 7.38 (dd,  $J$  = 1.7, 7.9 Hz, 1H), 7.25 (t,  $J$  = 7.9 Hz, 1H), 5.31 – 5.10 (m, 2H), 4.61 (s, 1H), 4.47 – 4.36 (m, 1H), 4.25 (qd,  $J$  = 1.3, 7.1 Hz, 2H), 3.14 (d,  $J$  = 10.4 Hz, 1H), 2.84 – 2.63 (m, 1H), 2.48 – 2.21 (m, 2H), 1.86 (dd,  $J$  = 0.9, 2.5 Hz, 3H), 1.30 (t,  $J$  = 7.1 Hz, 3H), 1.21 (s, 3H).  $^{13}\text{C}$ -NMR (67 MHz,  $\text{CDCl}_3$ ) 198.1, 169.8, 155.5, 142.4, 135.6, 134.7, 130.5, 130.4, 129.0, 127.8, 114.0, 82.0, 62.2, 50.2, 46.7, 42.3, 18.2, 14.3, 11.5.

**Tosylhydrazone 9a.** HOAc (0.01 g, 0.16 mmol) was added to a solution of enone **8a** (0.10 g, 0.24 mmol) and tosylhydrazide (0.06 g, 0.31 mmol) in  $\text{CH}_2\text{Cl}_2$  (2.20 mL). The reaction mixture stirred at rt for 24 h, then was washed with water (5.00 mL), dried over  $\text{MgSO}_4$ , filtered and concentrated in vacuo. The residue was purified via flash chromatography on silica gel (80:20, hexanes/EtOAc) to afford tosylhydrazone **9a** as white solid in 92 % yield (0.13 g, 0.22 mmol); mp 162-165  $^\circ\text{C}$ .  $^1\text{H}$ -NMR (400 MHz,  $\text{CDCl}_3$ )  $\delta$  8.02 – 7.79 (m, 3H), 7.46 (d,  $J$  = 9.5 Hz, 2H), 7.36 (t,  $J$  = 8.7 Hz, 3H), 7.14 (t,  $J$  = 7.7 Hz, 1H), 5.28 (s, 1H), 5.07 (d,  $J$  = 9.8 Hz, 1H), 4.70 (s, 1H), 4.48 (s, 1H), 4.25 (q,  $J$  = 7.1 Hz, 2H), 2.99 (s, 1H), 2.58 – 2.34 (m, 6H), 2.10 – 1.85 (m, 4H), 1.34 (t,  $J$  = 7.1 Hz, 3H), 1.22 (s, 3H).  $^{13}\text{C}$ -NMR (101 MHz,  $\text{CDCl}_3$ )  $\delta$  170.44, 153.31, 144.28, 143.92, 142.66, 138.39, 135.01, 132.51, 129.73, 129.69, 129.49, 128.25, 127.80, 127.78, 124.74, 114.17, 85.49, 78.23, 77.35, 77.04, 76.72, 61.70, 49.10, 44.80, 29.37, 21.66, 18.00, 14.18, 13.07. IR (film) 3210, 3070, 2980, 2919, 2256, 1739  $\text{cm}^{-1}$ . HRMS Calcd for  $\text{C}_{28}\text{H}_{31}\text{BrN}_2\text{O}_5\text{S}^+$ : 587.1215, found: 587.1201.

**Ester 10a.** Catecholborane (0.10 mL, 0.80 mmol) was added to a solution of tosylhydrazone **9a** (0.40 g, 0.70 mmol) in CHCl<sub>3</sub> (3.00 mL) at 0 °C. The reaction mixture stirred at 0 °C for 1 h, then NaOAc.3H<sub>2</sub>O (0.19 g, 1.30 mmol) was added in one portion. The reaction mixture was maintained for 1 h at 0 °C, diluted with CHCl<sub>3</sub> (1.80 mL), and heated under reflux for 12 h. The mixture was then cooled to rt and filtered through a pad of Celite. The filtrate was concentrated in vacuo and the residue was purified via flash chromatography over silica gel (90:10, hexanes/EtOAc) to afford ester **10a** as white solid in 68 % yield (0.17 g, 0.48 mmol); mp 37-40 °C; <sup>1</sup>H-NMR (270 MHz, CDCl<sub>3</sub>) δ 7.97 (d, J = 6.2 Hz, 1H), 7.49 (d, J = 8.0 Hz, 1H), 7.36 (t, J = 7.0 Hz, 1H), 7.12 (t, J = 7.6 Hz, 1H), 5.59 (s, 1H), 5.34 (d, J = 6.4 Hz, 1H), 4.79 (s, 2H), 4.38 (d, J = 6.4 Hz, 1H), 4.25 (dd, J = 4.9, 7.1 Hz, 2H), 3.01 (s, 1H), 2.37 (m, 3H), 2.21 – 2.04 (m, 1H), 1.73 (s, 3H), 1.60 (s, 4H), 1.31 (t, J = 7.1 Hz, 3H). <sup>13</sup>C-NMR (67 MHz, CDCl<sub>3</sub>) δ 173.01, 146.94, 140.85, 132.70, 130.21, 129.58, 129.37, 128.04, 123.25, 123.10, 112.16, 83.50, 81.30, 77.56, 77.09, 76.62, 61.33, 49.14, 47.31, 39.39, 28.04, 22.08, 21.00, 14.22.

## Biological Assays

**KB3 Assays.** All stock solutions of compounds were made at 10 mM in dimethyl sulfoxide (DMSO). DMSO and 3-(4,5-dimethylthiazol-2-yl)-2,5-diphenyltetrazolium bromide (MTT) were from Sigma Chemical Co. (St. Louis, MO). Cell culture reagents were obtained from Life Technologies (Carlsbad, CA).

**Cell Culture.** The KB-3 human carcinoma cell line was maintained in monolayer culture at 37°C and 5% CO<sub>2</sub> in Dulbecco's Modified Eagle's Medium, supplemented with 10% fetal bovine serum, 2 mM L-glutamine, 50 units/mL penicillin, and 50 µg/mL streptomycin.

**MTT colorimetric assay.** Inhibition of cell proliferation was assessed by the MTT colorimetric assay. First described by Mosmann,<sup>1</sup> this assay is based on the ability of a mitochondrial dehydrogenase enzyme from viable cells to cleave the tetrazolium rings of the pale yellow MTT and form a dark blue formazan crystal product which is largely impermeable to cell membranes, thus resulting in its accumulation within healthy cells. Solubilization of the cells by the addition of solvent results in the liberation of the crystals which are solubilized. The level of the formazan product created is directly proportional to the number of living cells.

KB-3 cells (2000/well) were plated in 96-well dishes, and were treated after 24 h with different concentrations (0.1 nM -100 µM) of the compound being assayed. The final concentration of DMSO did not exceed 1%, and controls received vehicle alone. MTT assay was performed after 96 h as described.<sup>2,3</sup> Cells were incubated with 50 µg/well/0.2 mL MTT for 4 h at 37°C, the media was removed and the formazan crystals were dissolved in 150 µL of DMSO. The resulting color change was measured via spectrophotometry at a wavelength of 570 nm using an ELx800™ Absorbance Microplate Reader (Bio Tek Instruments, Inc., Winooski, VT). Values are the means of triplicate assays and are expressed as mean relative to untreated controls. IC<sub>50</sub>

<sup>1</sup> Mosmann T. *J. Immunol. Methods* **1983**, 65, 55-63.

<sup>2</sup> Fan, M.; Du, L.; Stone, A. A.; Gilbert K. M.; Chambers, T. C. *Cancer Res.* **2000**, 60, 6403-6407.

<sup>3</sup> Alley, M. C.; Scudiero, D. A.; Monks A.; Hursey, M. L.; Czerwinski, M. J.; Fine, D. L.; Abbott, B. J.; Mayo, J. G.; Shoemaker, R. H.; Boyd M. R. *Cancer Res.* **1988**, 48, 589-601

is the concentration that reduced survival to 50% of the control (no drug). Representative concentrations curves are shown below (Figure).

Figure. Concentration curves of Sclerologs **5a**, **5c**, **8a** and **10a**.

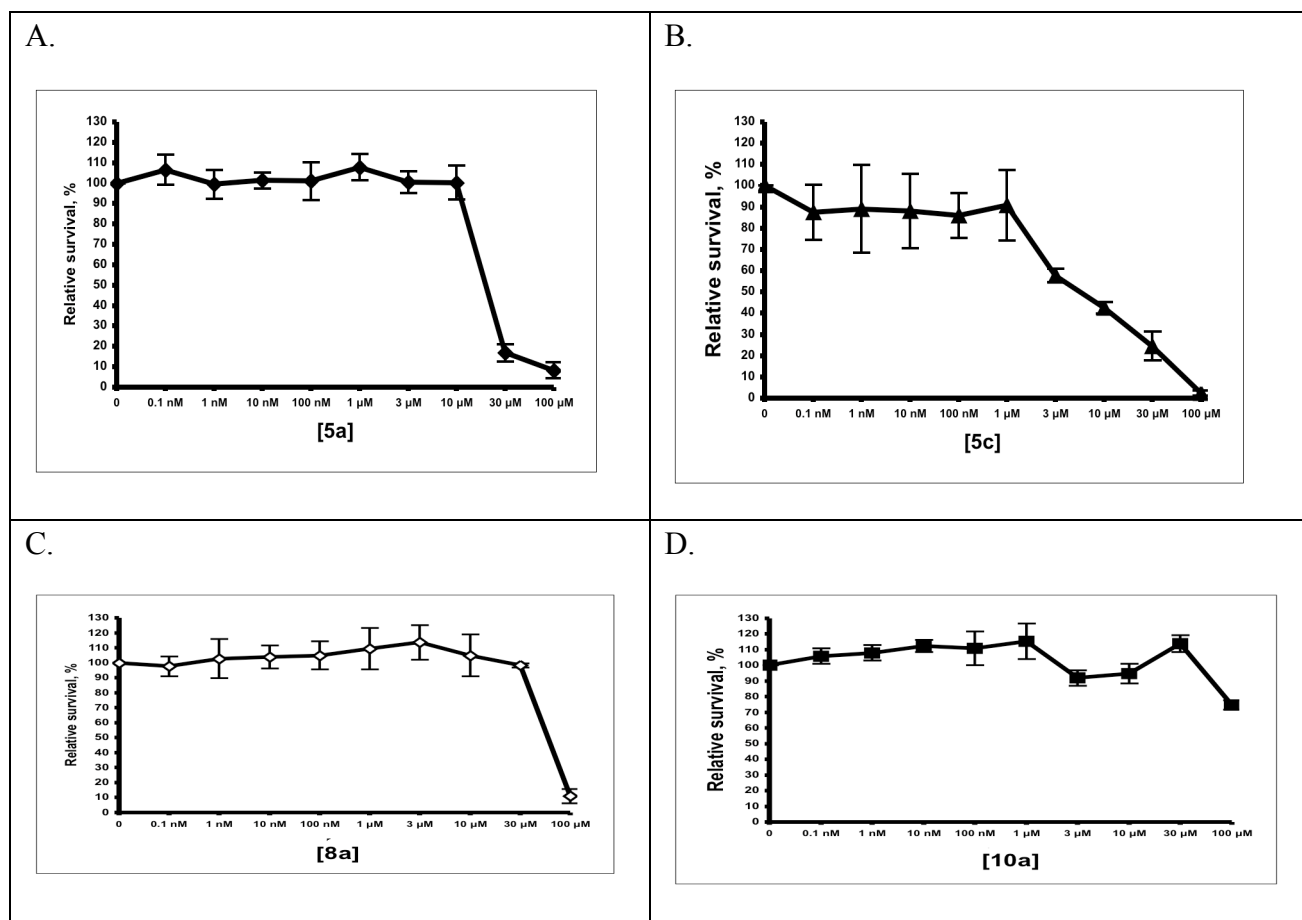

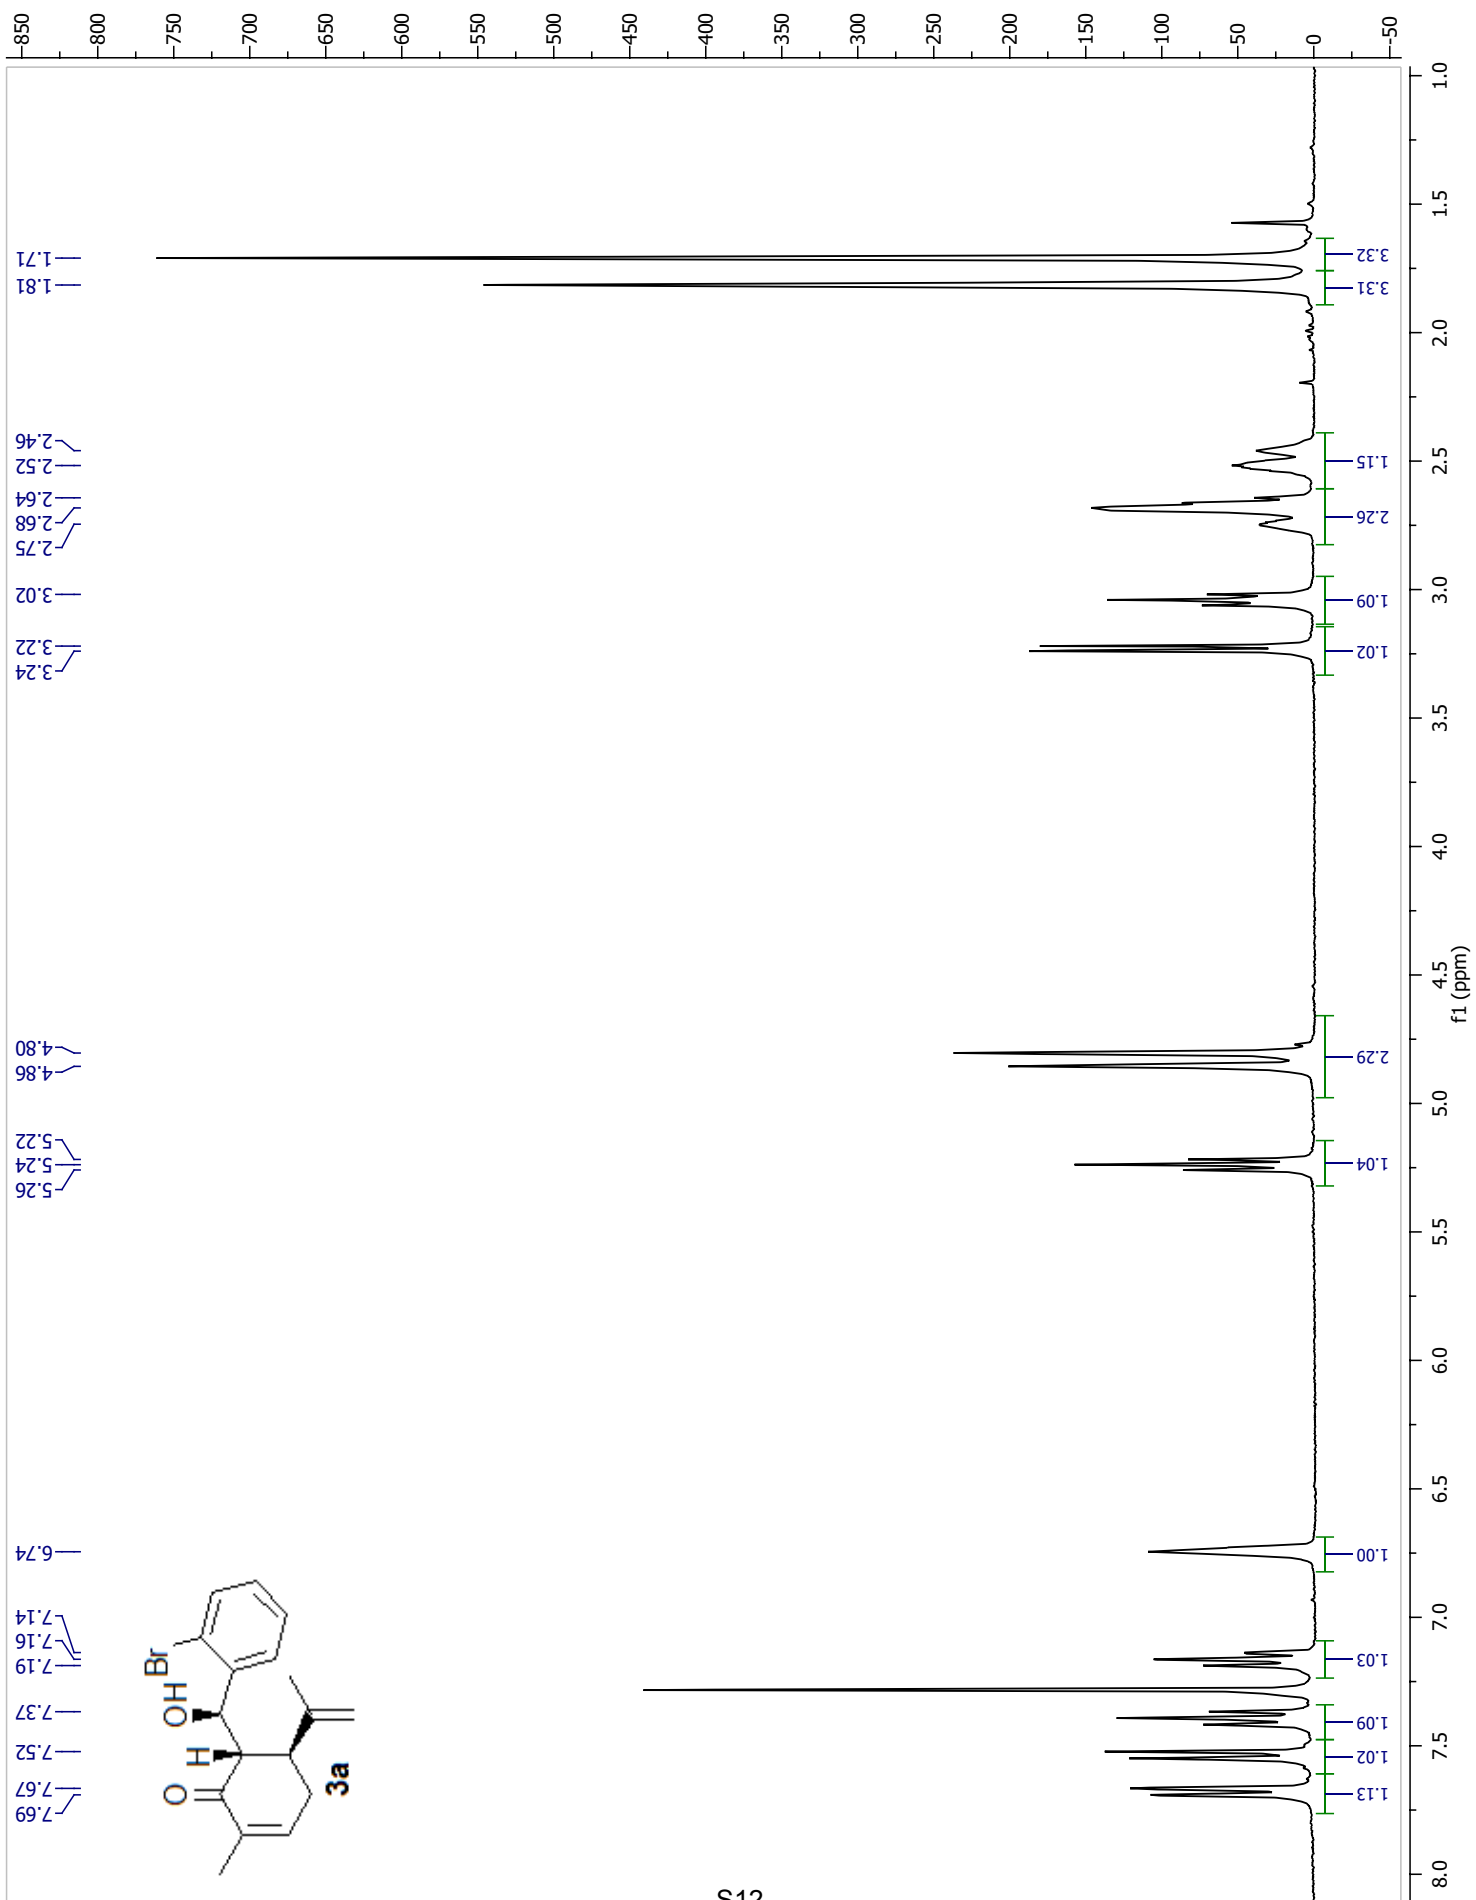

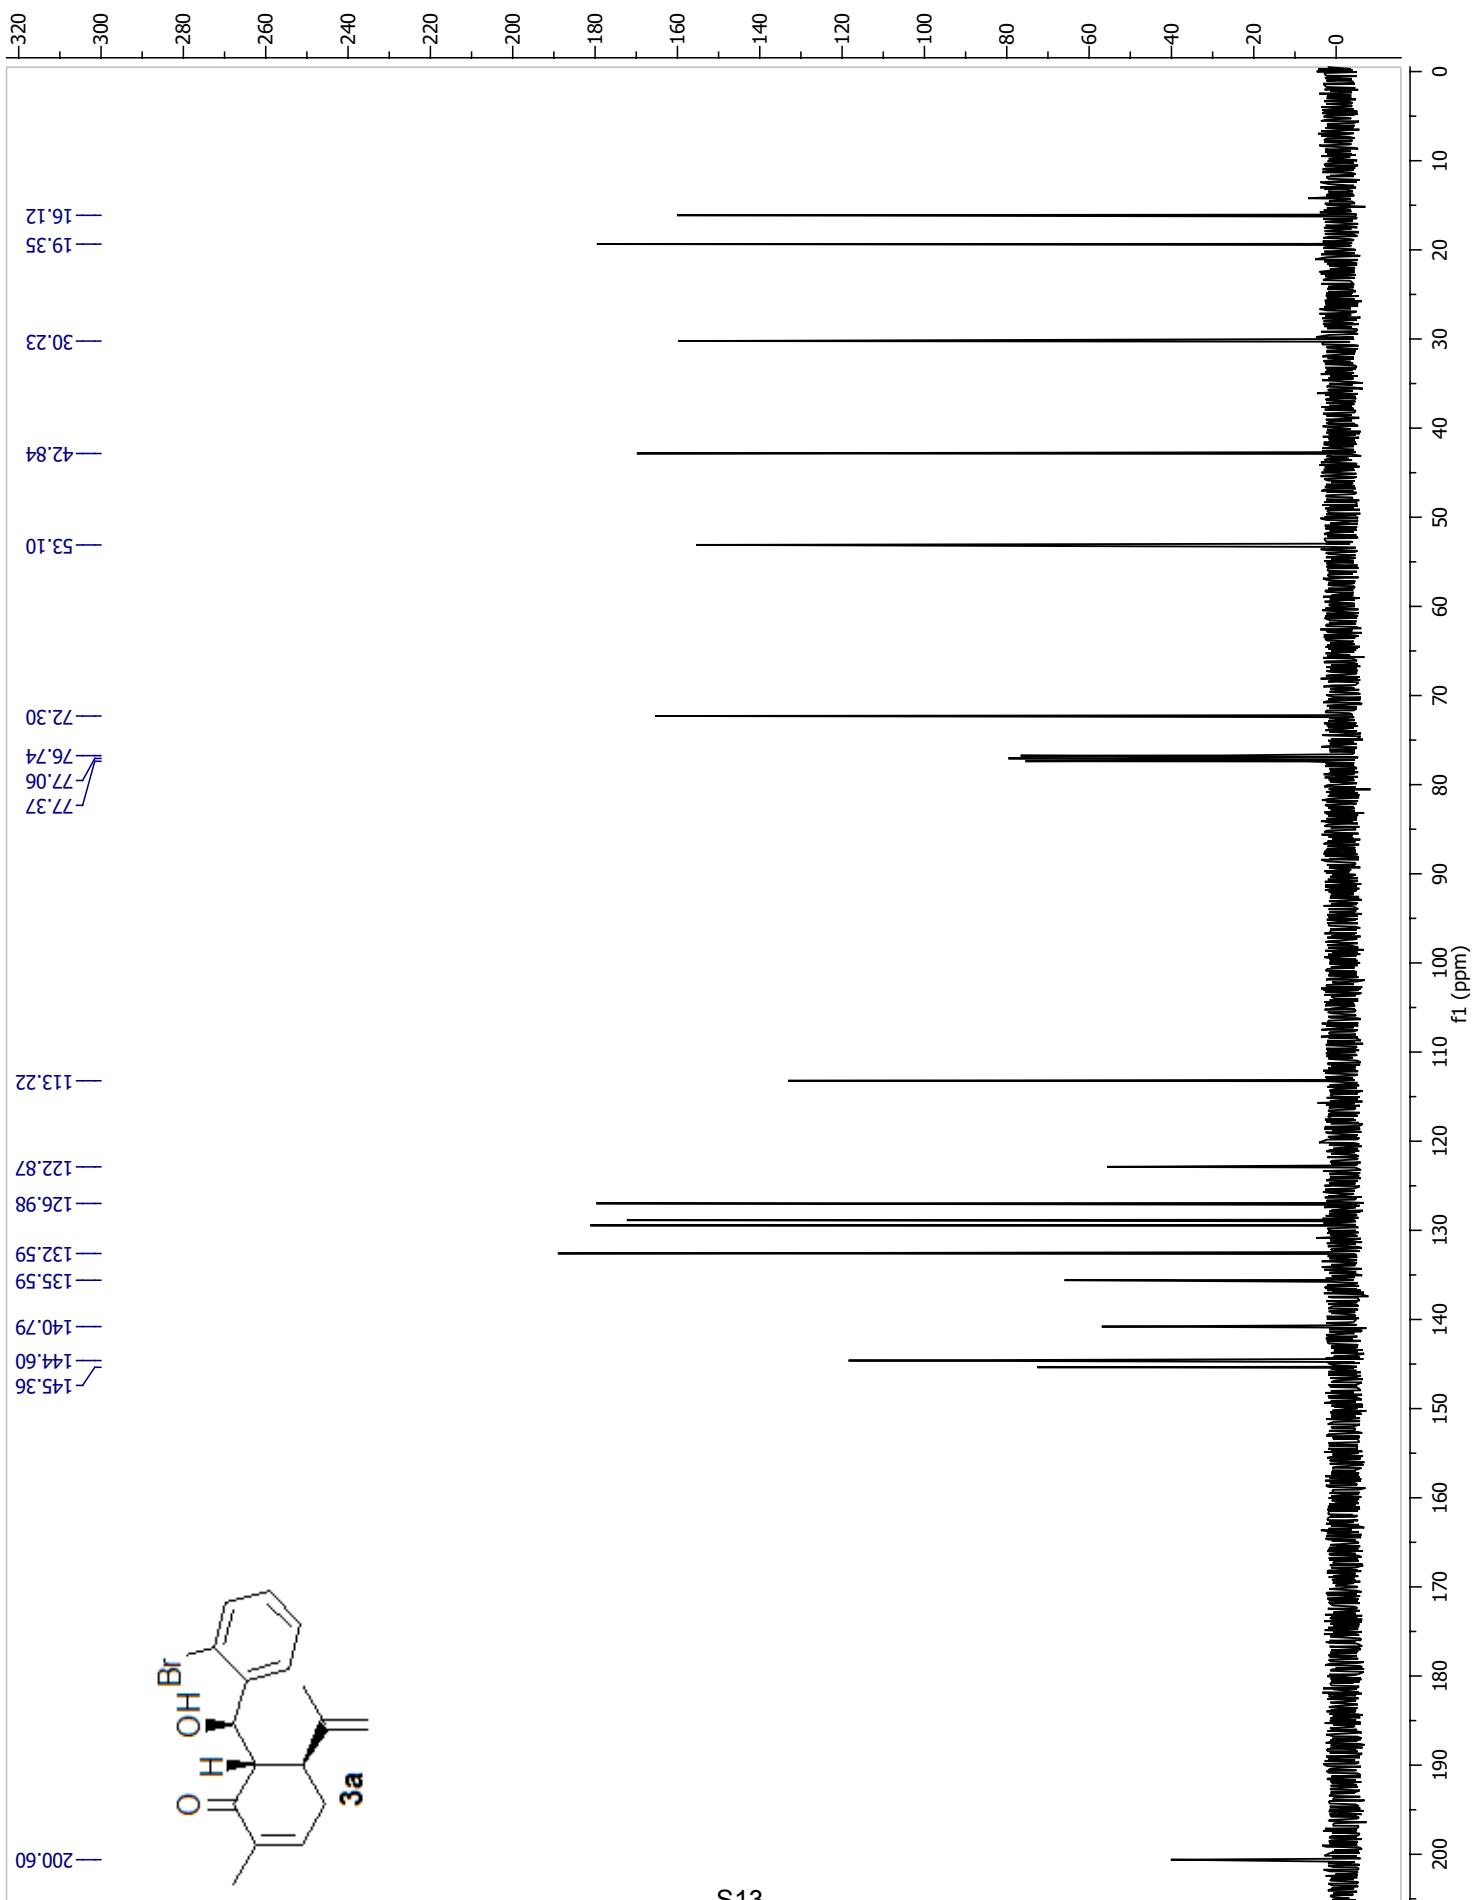

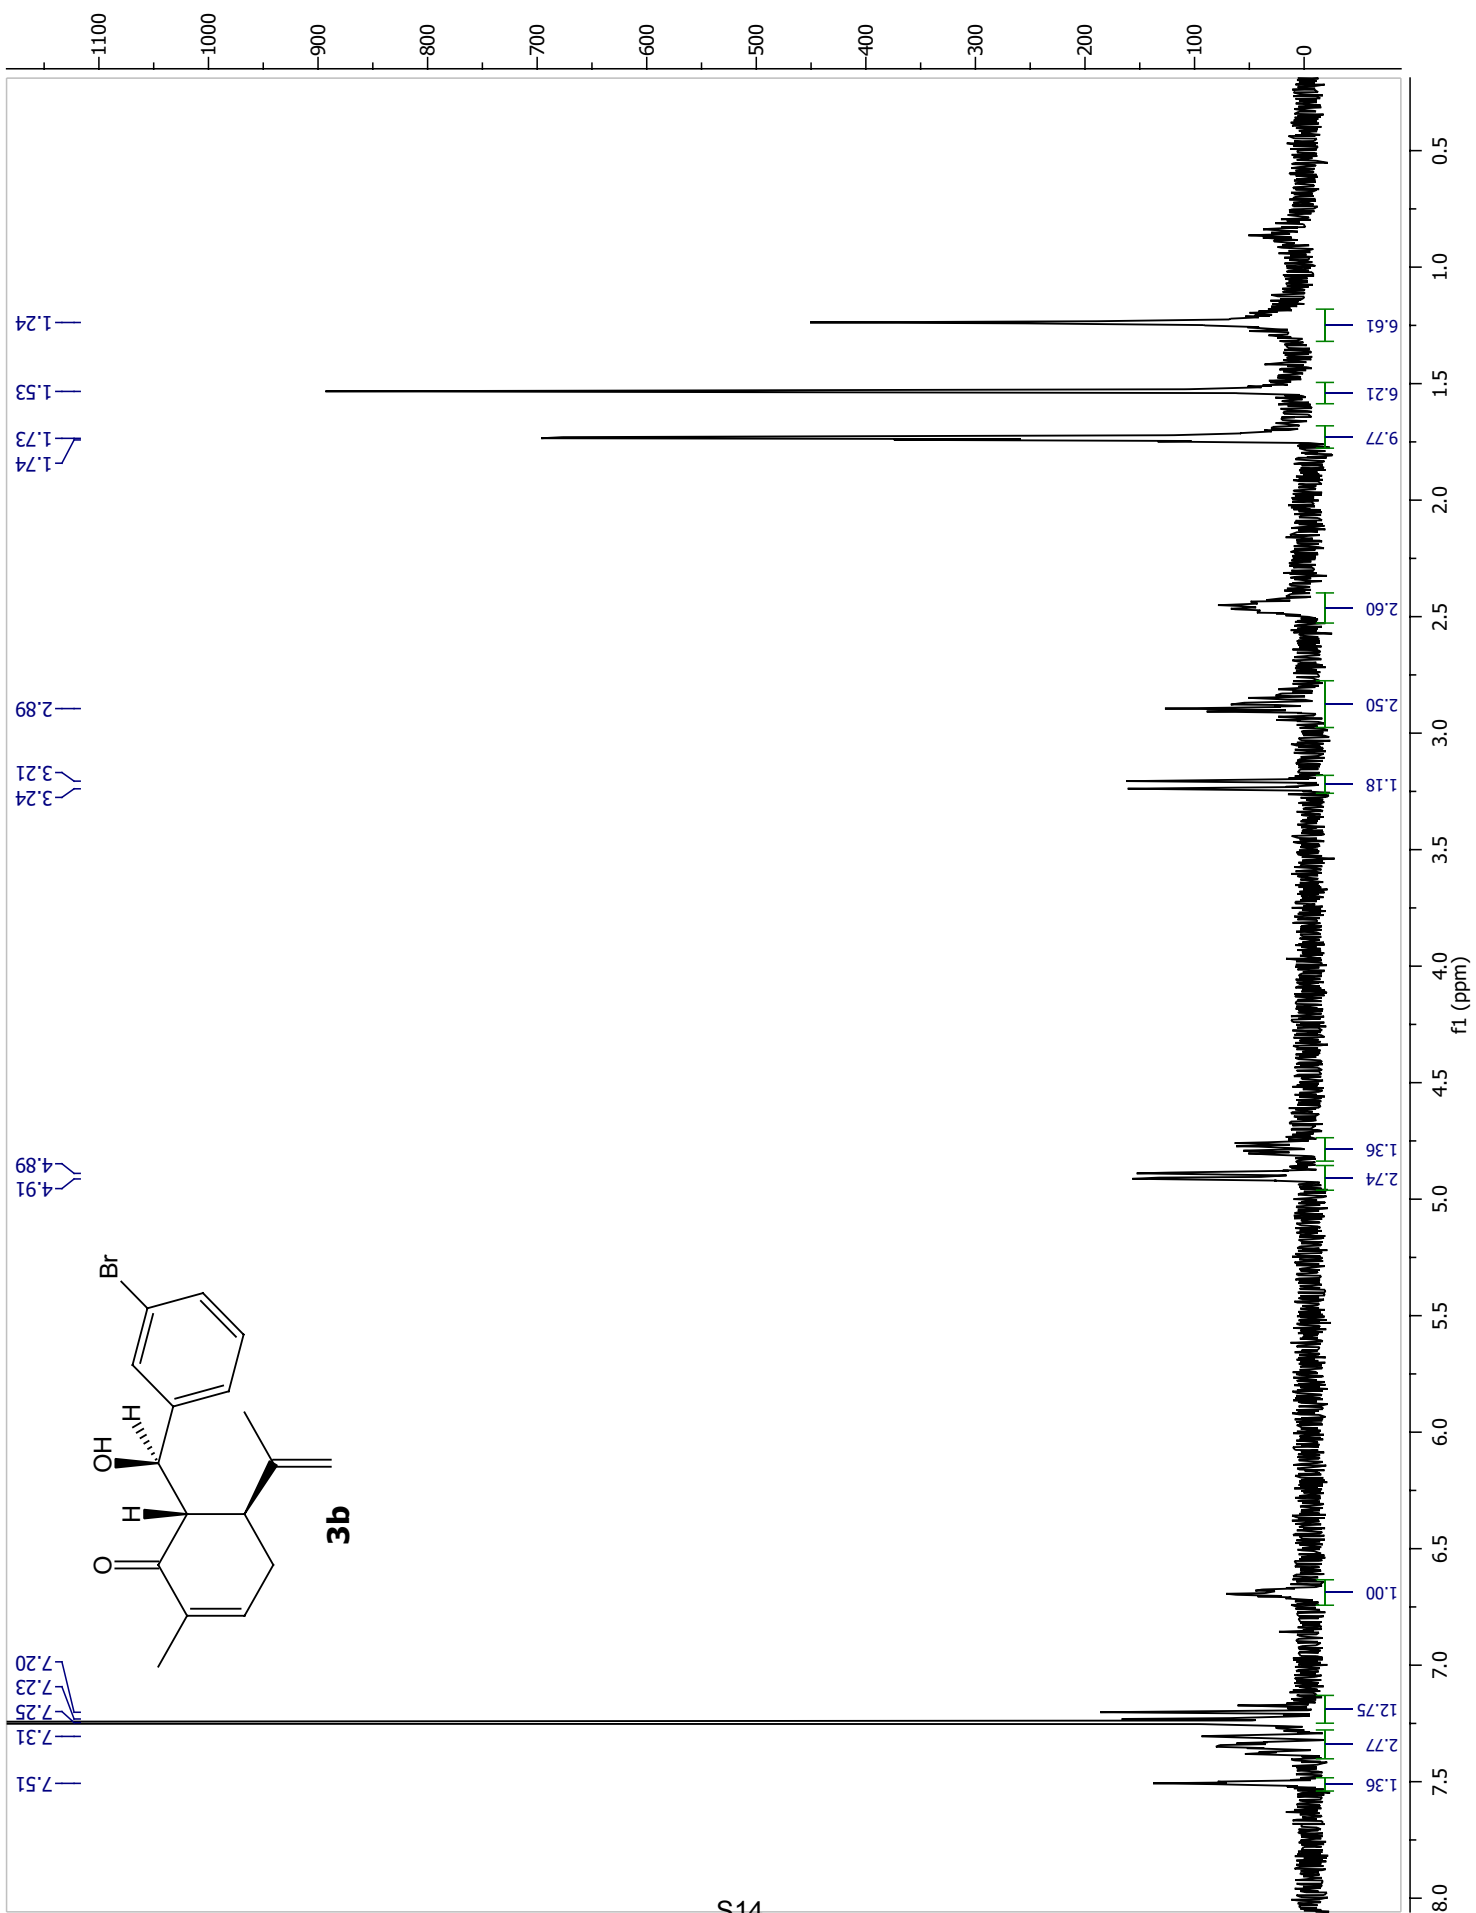

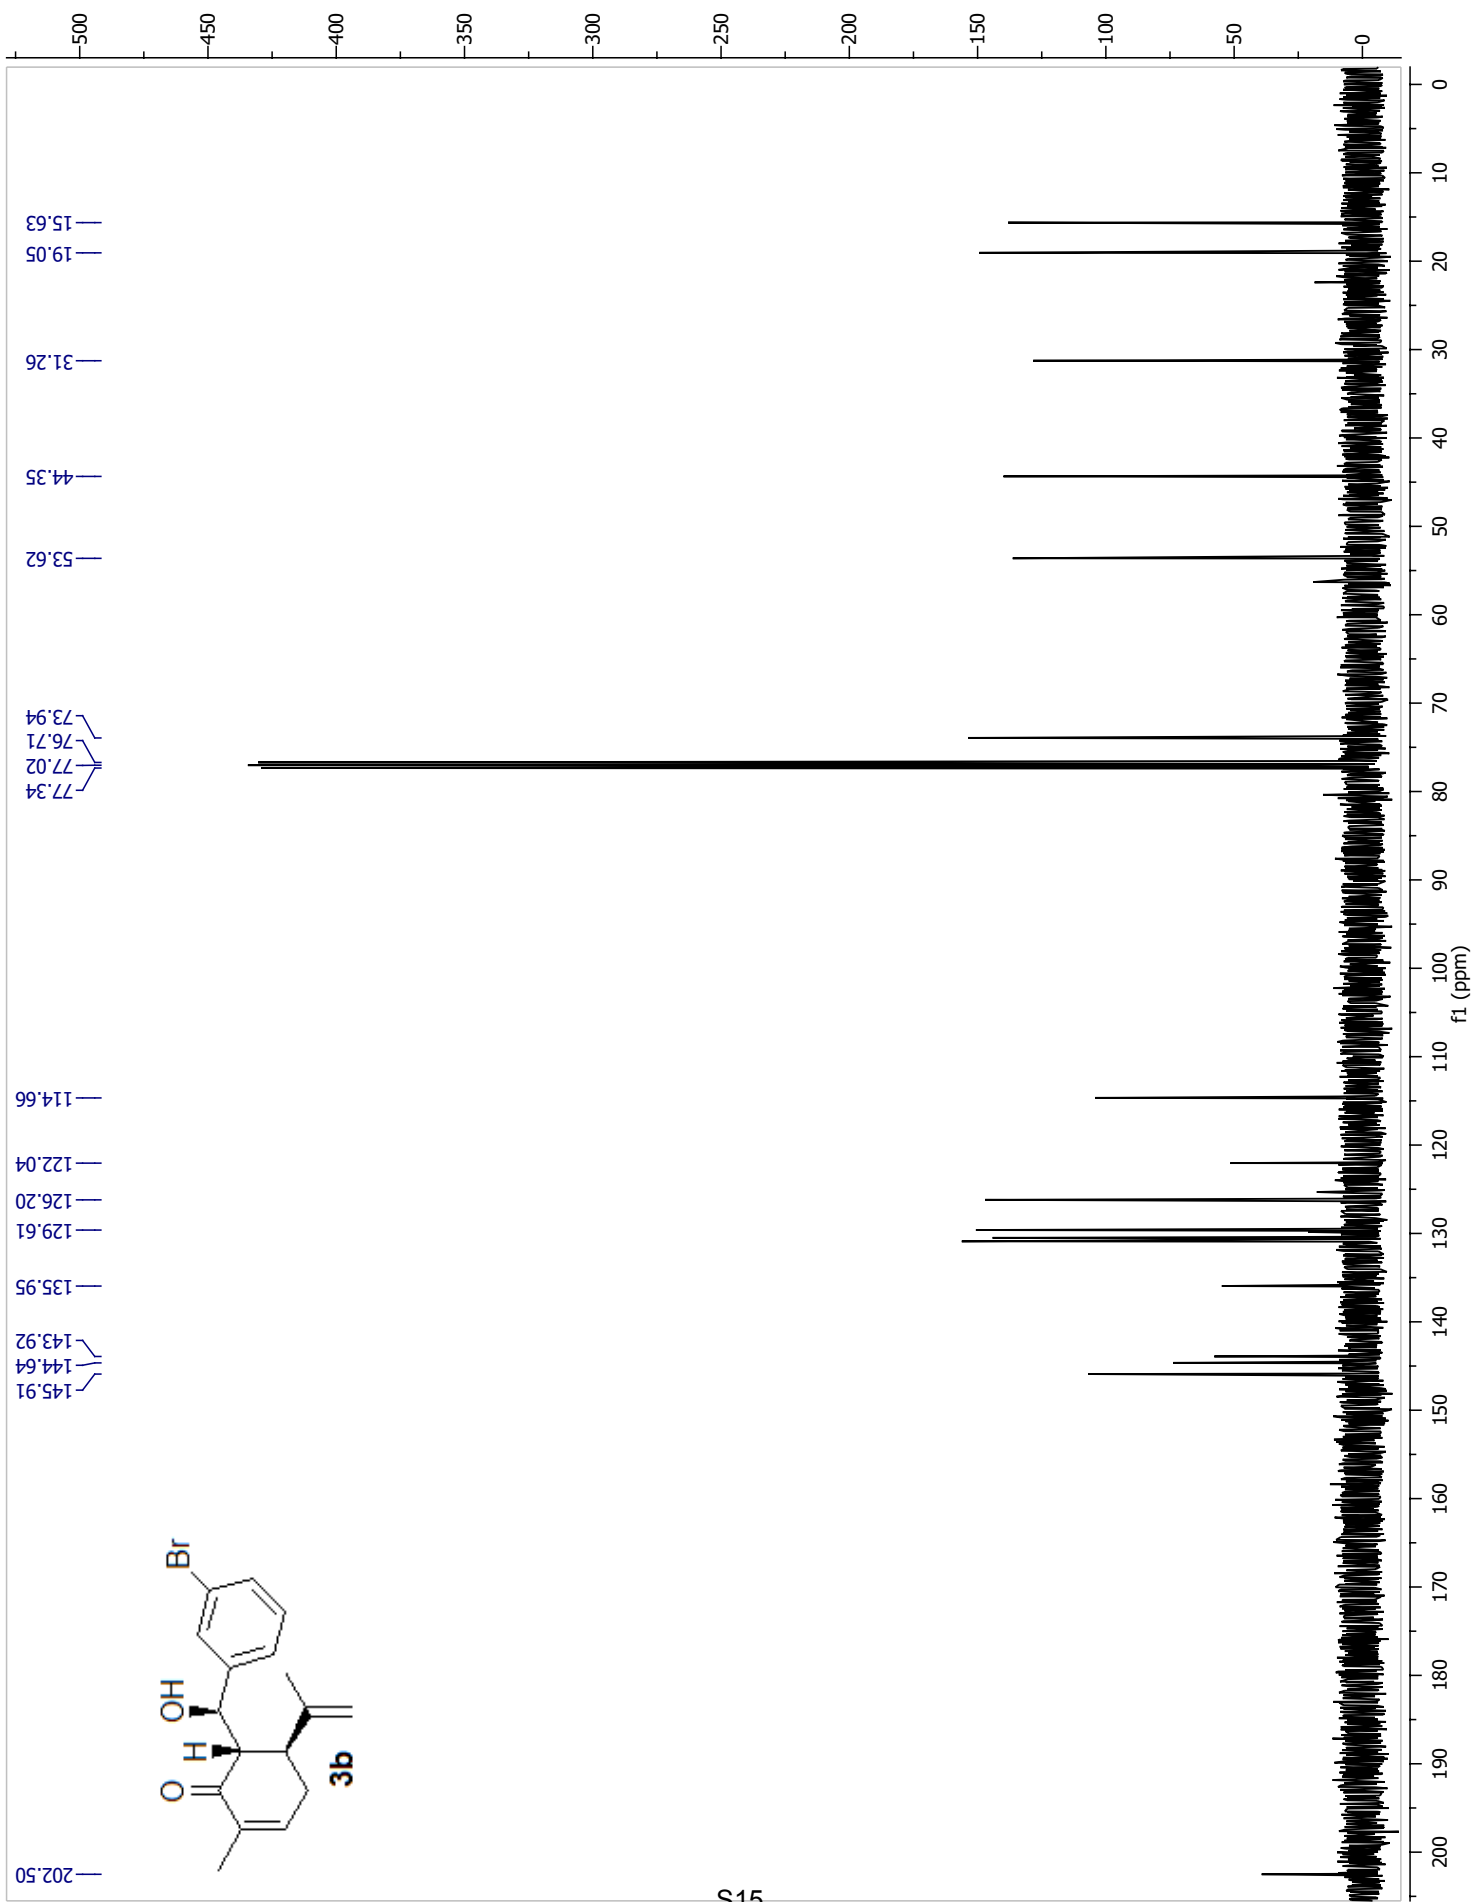

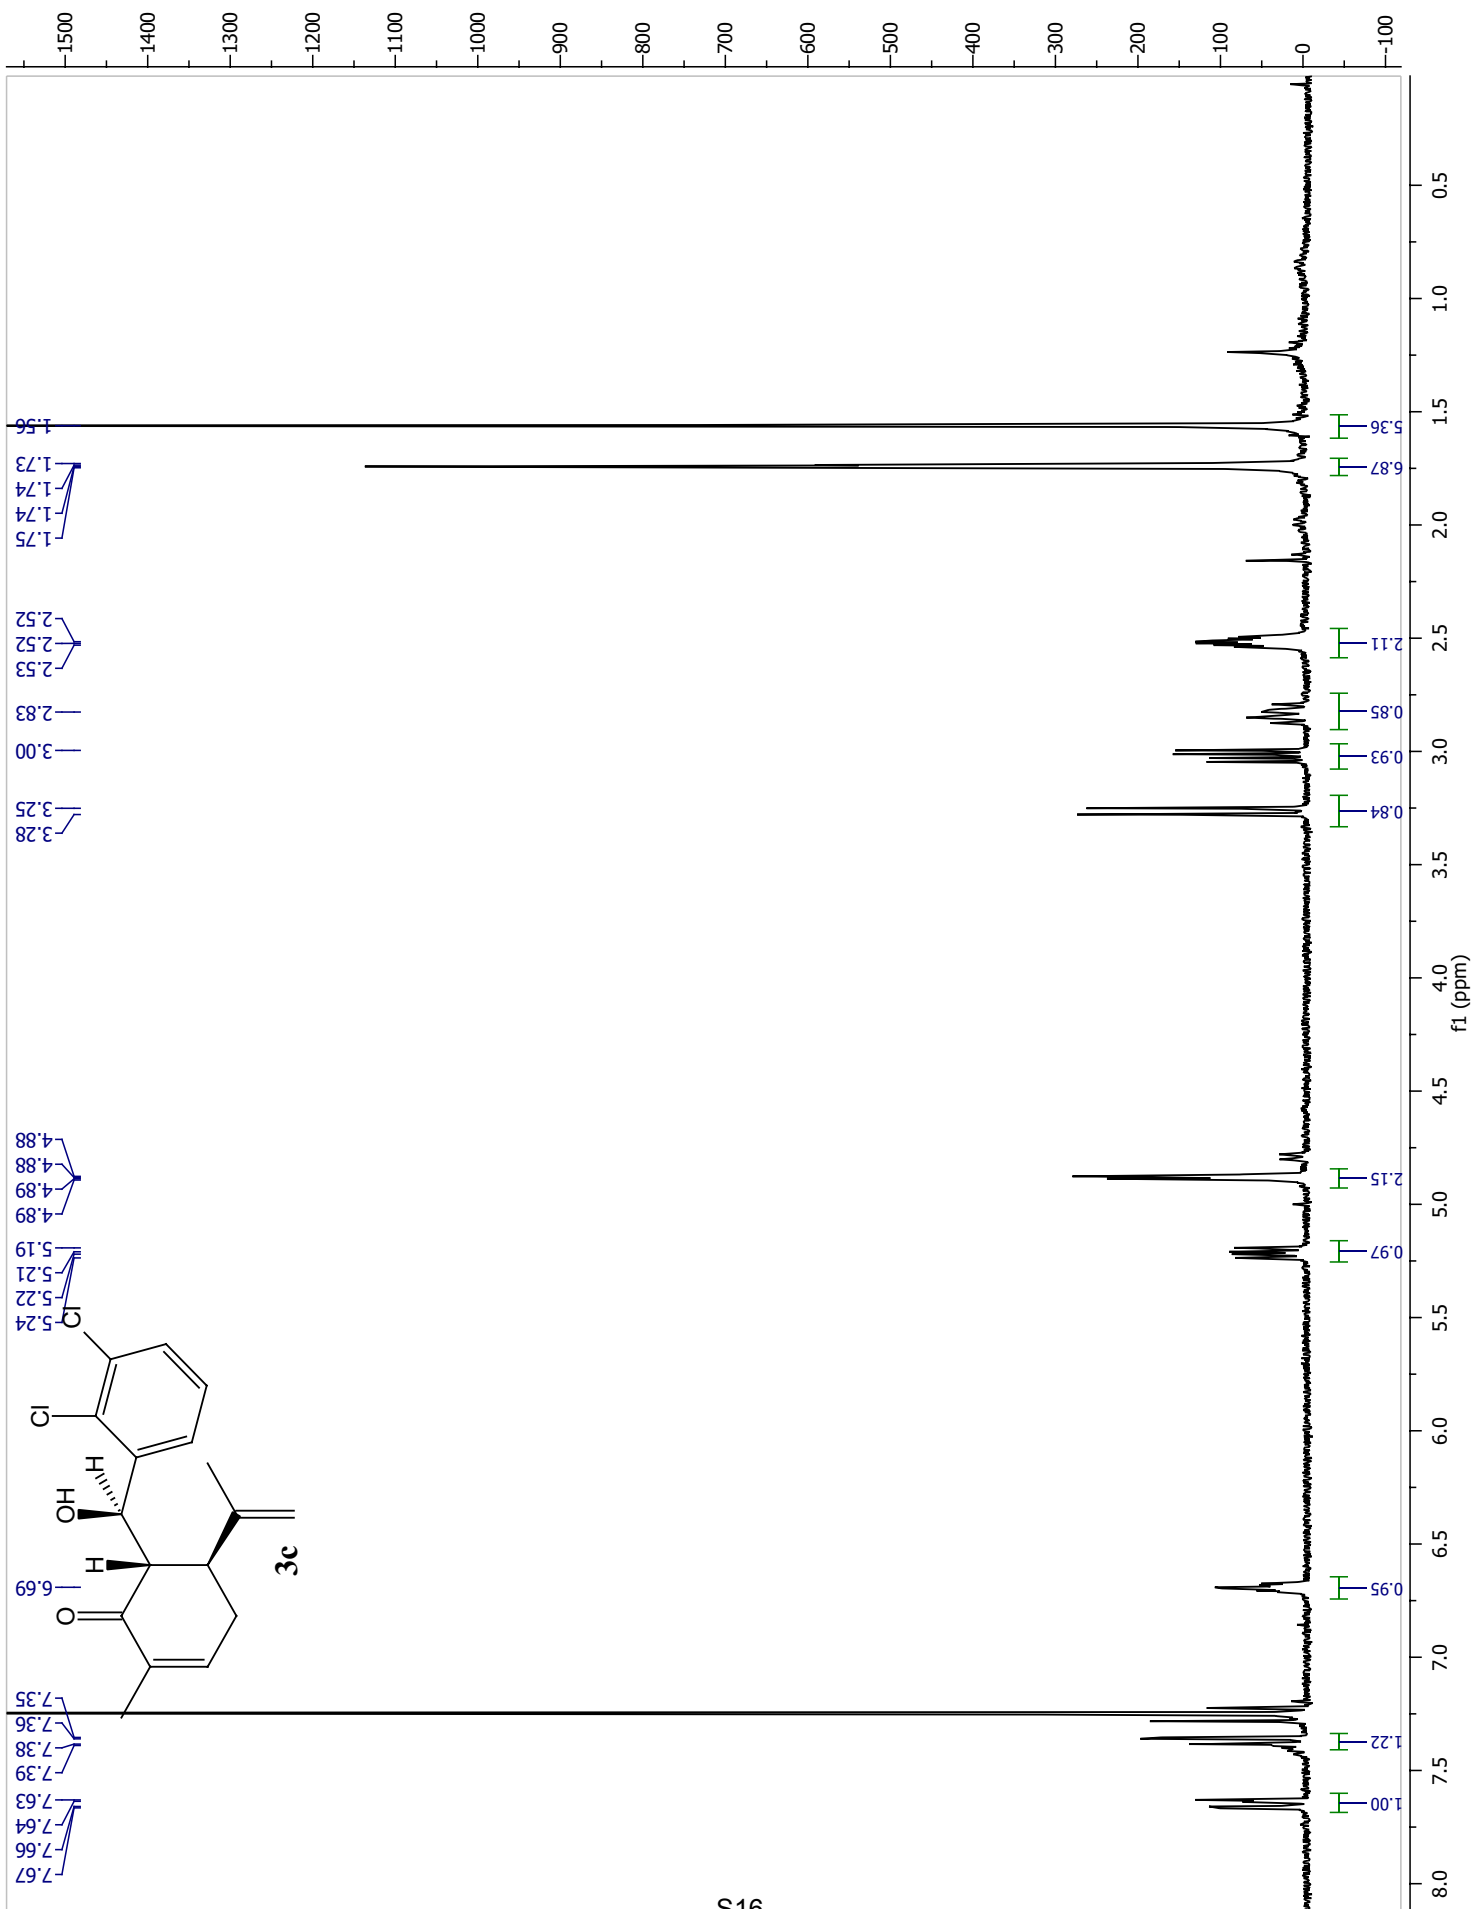

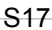

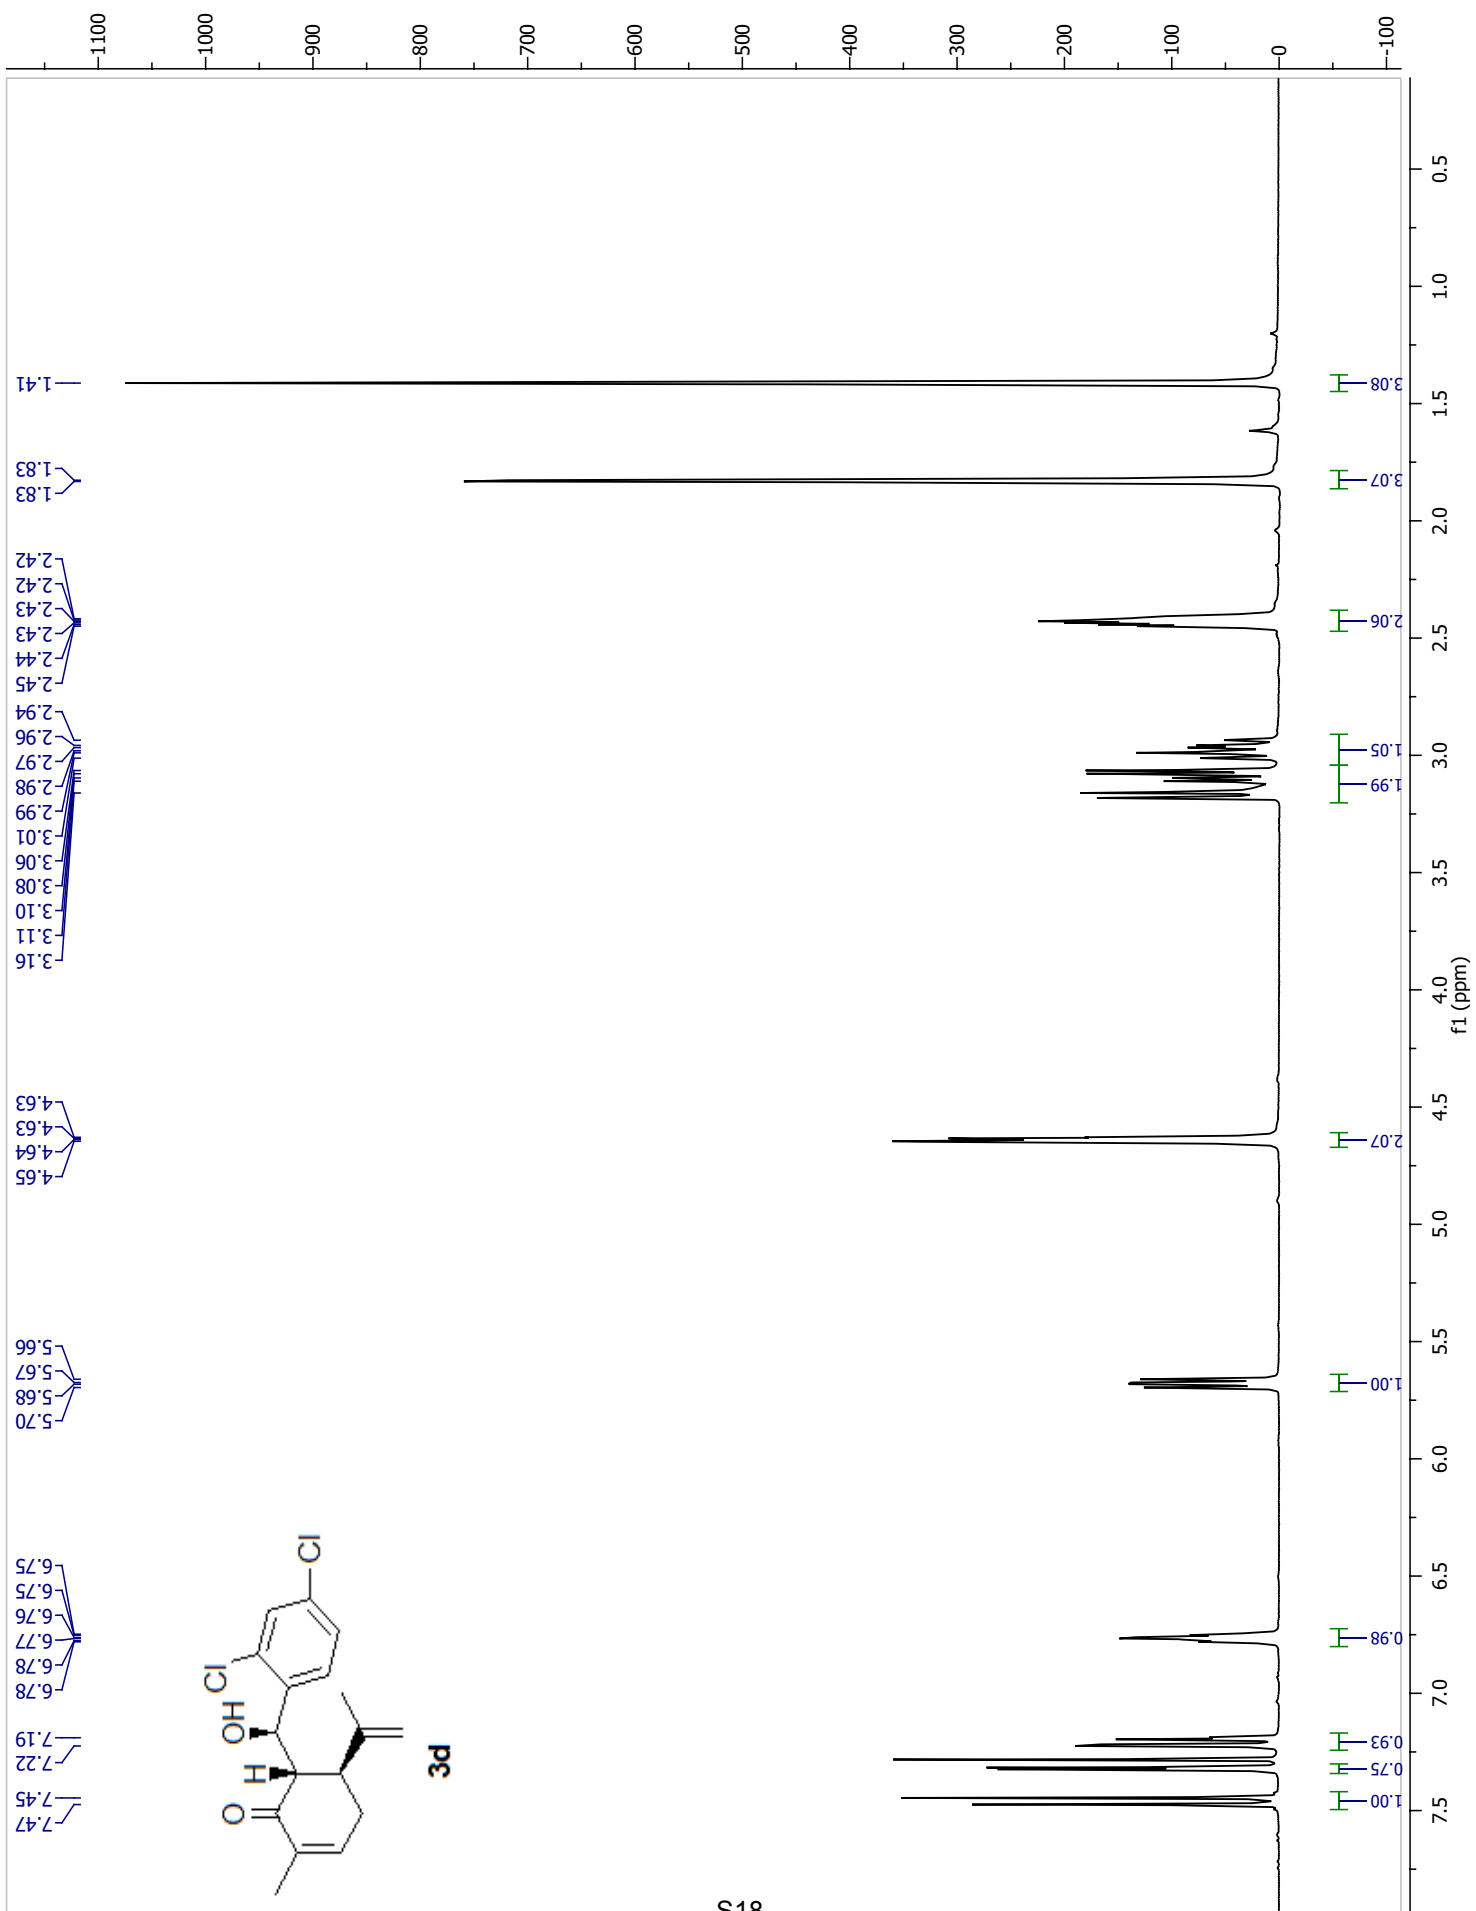

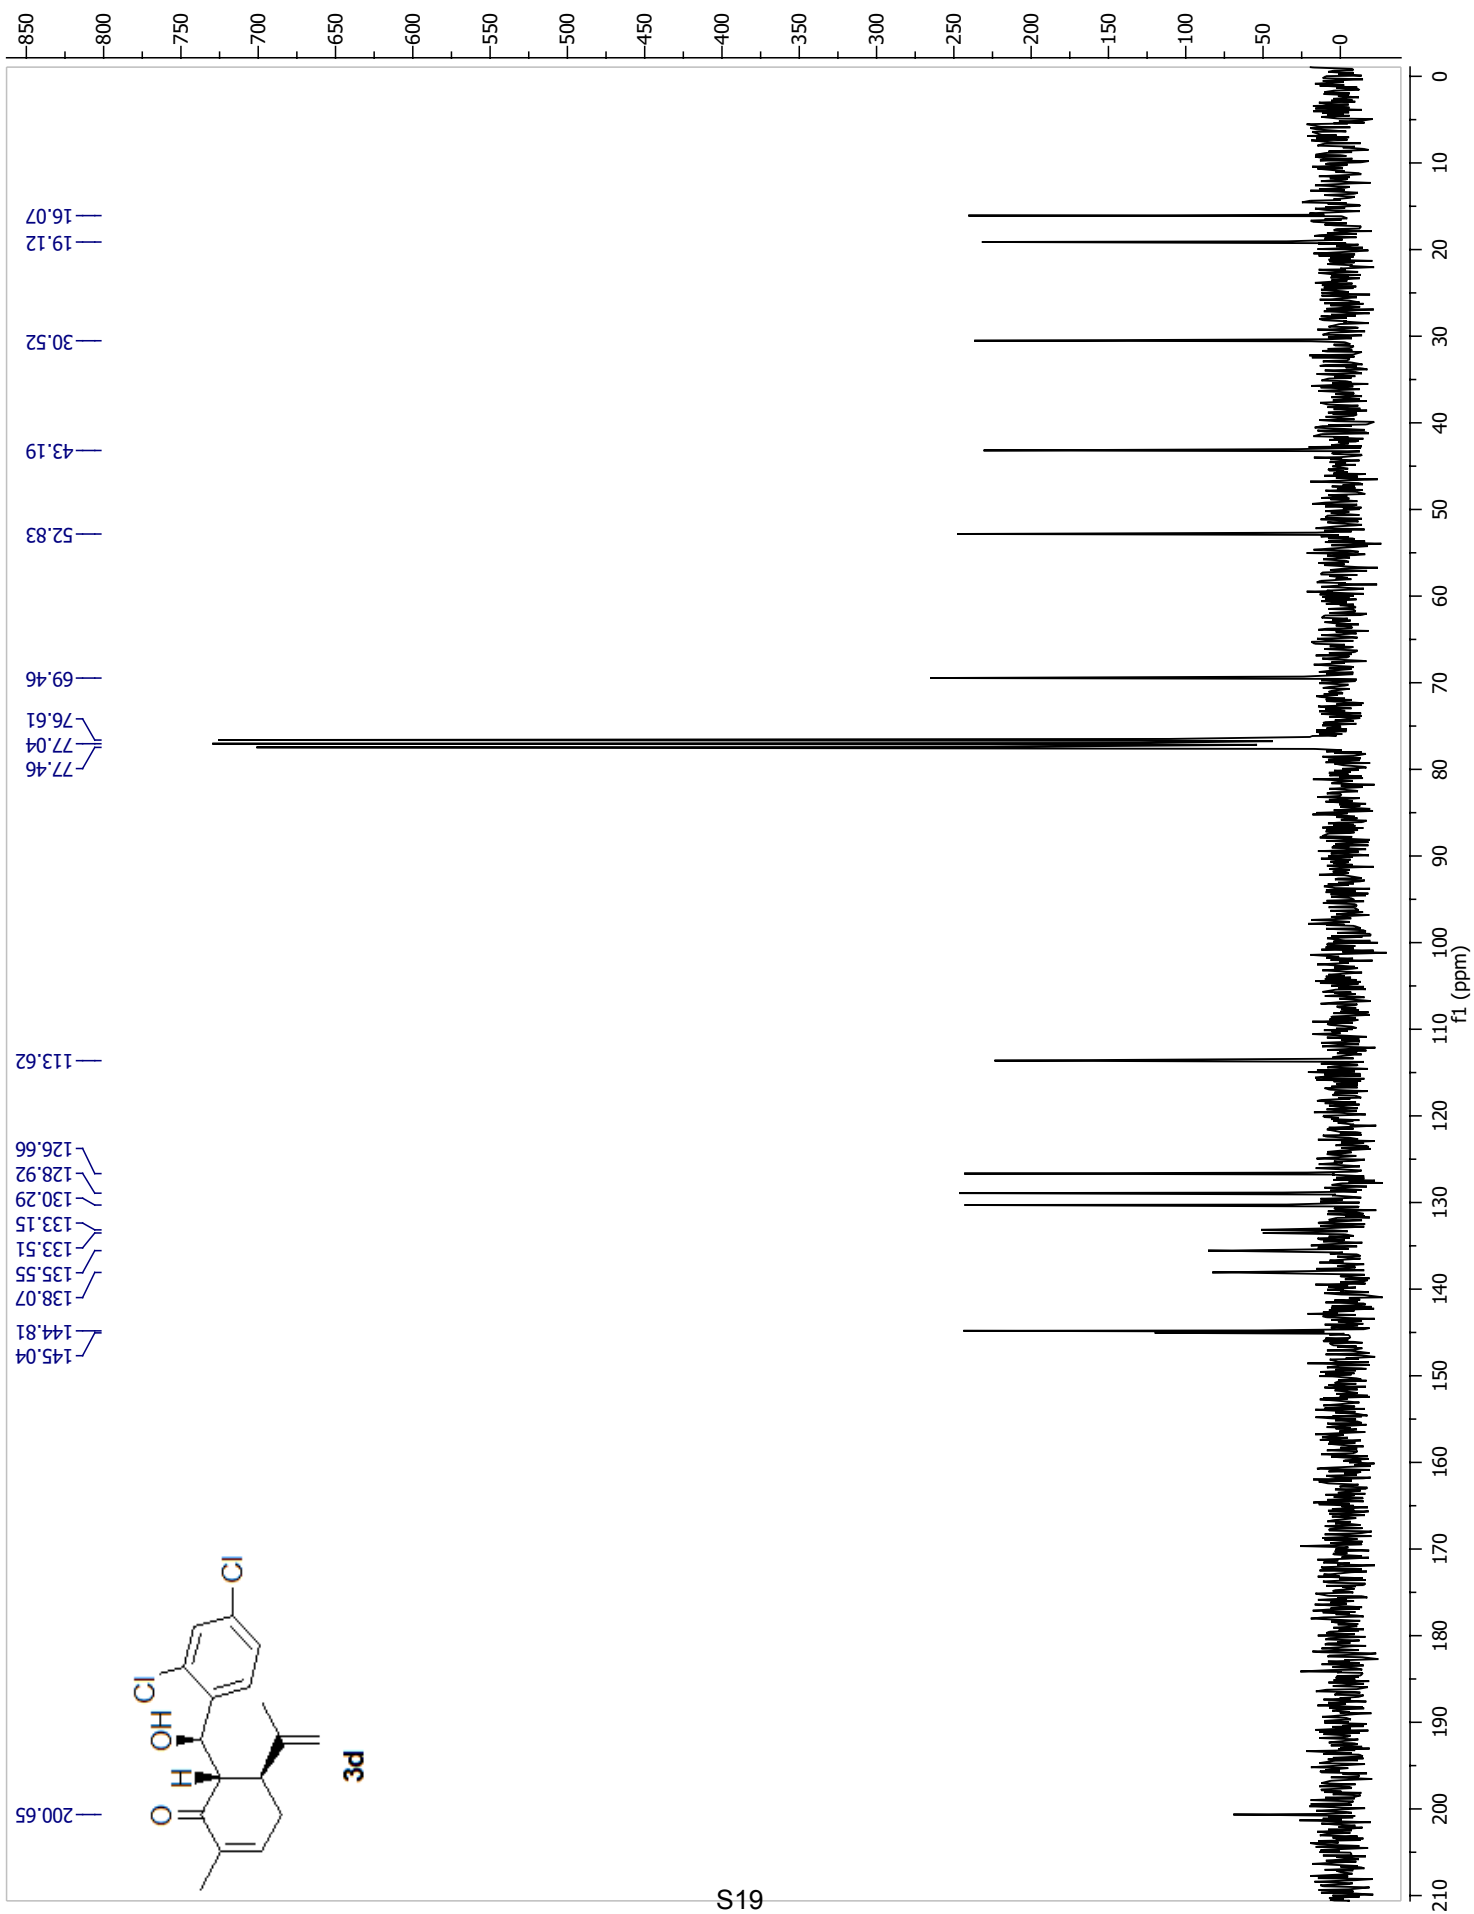

Current Data Parameters  
NAME km-1206  
EXPNO 2  
PROCNO 1

F2 - Acquisition Parameters  
Date\_ 20070916  
Time 0.01  
INSTRUM spect  
PROBHD 5 mm PABBO BB-  
PULPROG zgpg30  
TD 35968  
SOLVENT COC13  
NS 9000  
DS 4  
SWH 17361.111 Hz  
FIDRES 0.482682 Hz  
AQ 1.0359284 sec  
RG 14596.5  
DM 28.800 usec  
DE 6.00 usec  
TE 297.0 K  
D1 2.00000000 sec  
d11 0.03000000 sec  
DELTA 1.89999998 sec  
MCREST 0.00000000 sec  
MCWRR 0.01500000 sec

===== CHANNEL f1 =====  
NUC1 13C  
P1 8.38 usec  
PL1 -2.80 dB  
SF01 75.4752953 MHz

===== CHANNEL f2 =====  
CPOPRG2 waltz16  
NUC2 1H  
PCPD2 80.00 usec  
PL2 -0.60 dB  
PL12 15.73 dB  
PL13 16.00 dB  
SF02 300.1312005 MHz

F2 - Processing parameters  
SI 32768  
SF 75.4677355 MHz  
WDW EM  
SSB 0  
LB 1.00 Hz  
GB 0  
PC 1.40

1D NMR plot parameters  
CX 20.00 cm  
CY 10.00 cm  
F1P 215.196 ppm  
F1 16240.38 Hz  
F2P 0.000 ppm  
F2 0.00 Hz  
DPMCM 10.75982 ppm/cm  
HZCM 812.01886 Hz/cm

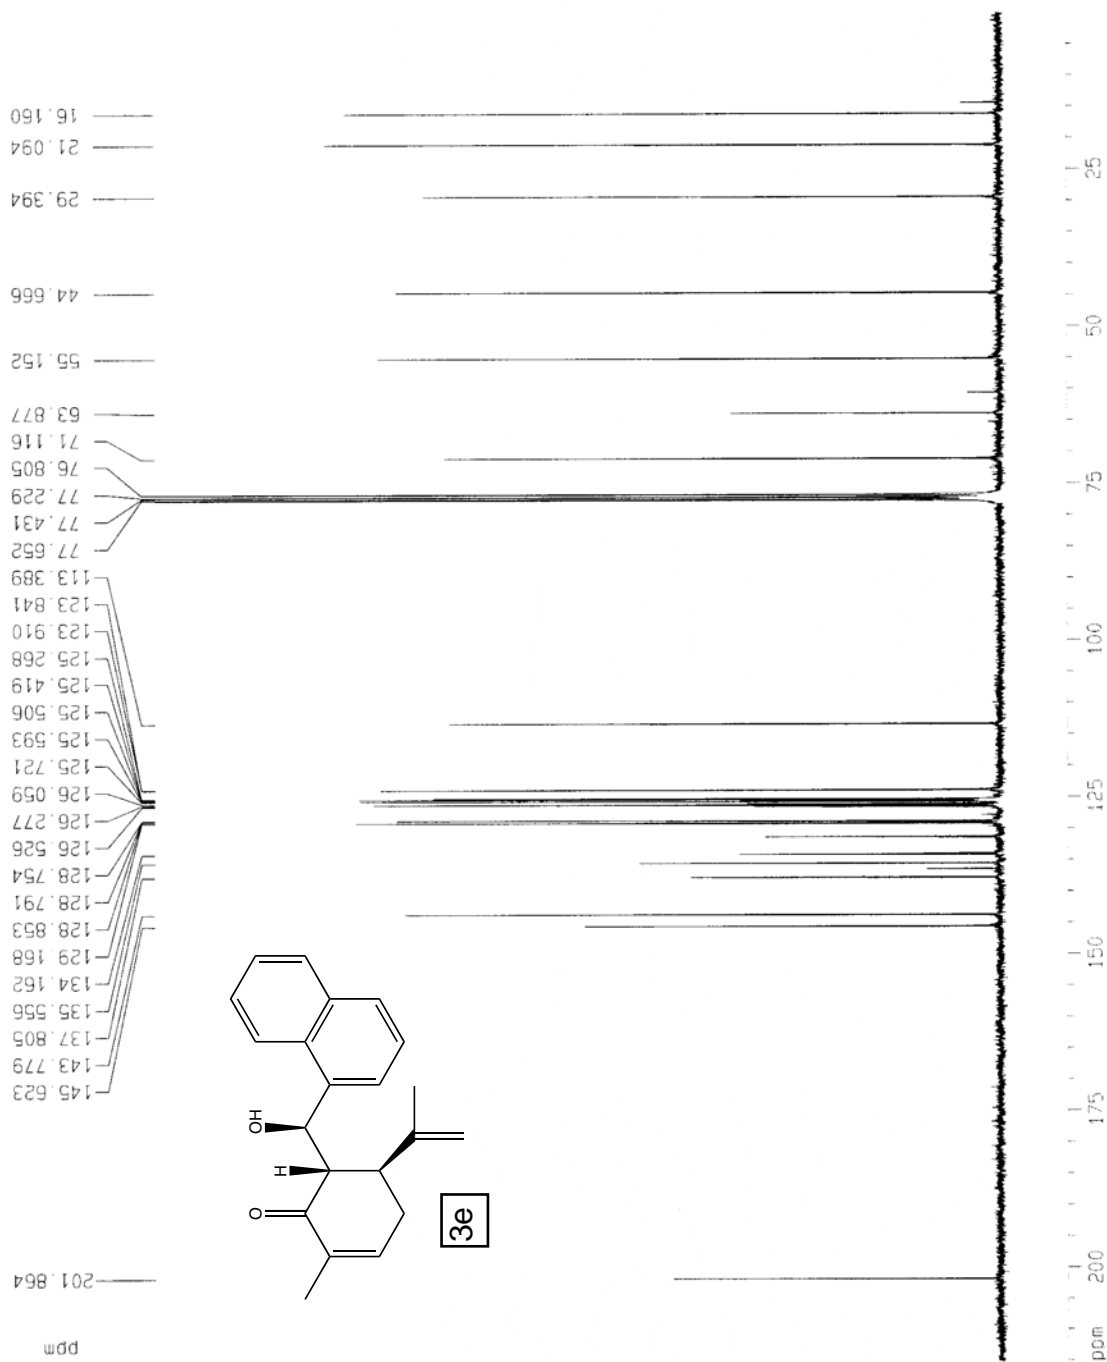

Current Data Parameters  
NAME km-1206  
EXPNO 4  
PROCNO 1

F2 - Acquisition Parameters

Date\_ 20070916  
Time 6.02  
INSTRUM spect  
PROBHD 5 mm PABBO BB-  
PULPROG zg30  
TD 24690  
SOLVENT CDCl3  
NS 8  
DS 2  
SWH 4194.631 Hz  
FIDRES 0.169892 Hz  
AQ 2.9430981 sec  
RG 143.7  
DM 119.200 usec  
DE 6.00 usec  
TE 296.4 K  
D1 1.00000000 sec  
MCREST 0.00000000 sec  
MCWRK 0.01500000 sec

===== CHANNEL f1 =====

NUC1 1H  
P1 12.20 usec  
PL1 -0.60 dB  
SF01 300.1318608 MHz

F2 - Processing parameters

SI 32768  
SF 300.1300070 MHz  
WDW EM  
SSB 0  
LB 0.30 Hz  
GB 0  
PC 1.00

1D NMR plot parameters

CX 20.00 cm  
CY 12.50 cm  
F1P 9.000 ppm  
F1 2701.17 Hz  
F2P 0.000 ppm  
F2 0.00 Hz  
PPMCH 0.45000 ppm/cm  
HZCM 135.05850 Hz/cm

1.26015  
1.59962  
1.64106  
1.83048  
1.83500  
2.04453  
2.41359  
2.42026  
2.42697  
2.43384  
2.48966  
2.50132  
2.50765  
2.51455  
2.52131  
2.62147  
2.64287  
2.66381  
3.22665  
3.24772  
3.26983  
3.35957  
3.38103  
4.78292  
4.84530  
5.14882  
5.54539  
5.56571  
5.58595  
6.70824  
6.71197  
6.72137  
7.26000  
7.44722  
7.47196  
7.48378  
7.50227  
7.50696  
7.50947  
7.52335  
7.52921  
7.60189  
7.62546  
7.79560  
7.82279  
7.86065  
7.86729  
7.89142  
ppm

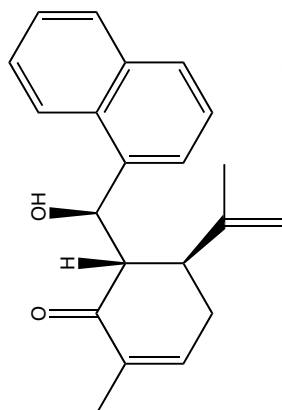

3e

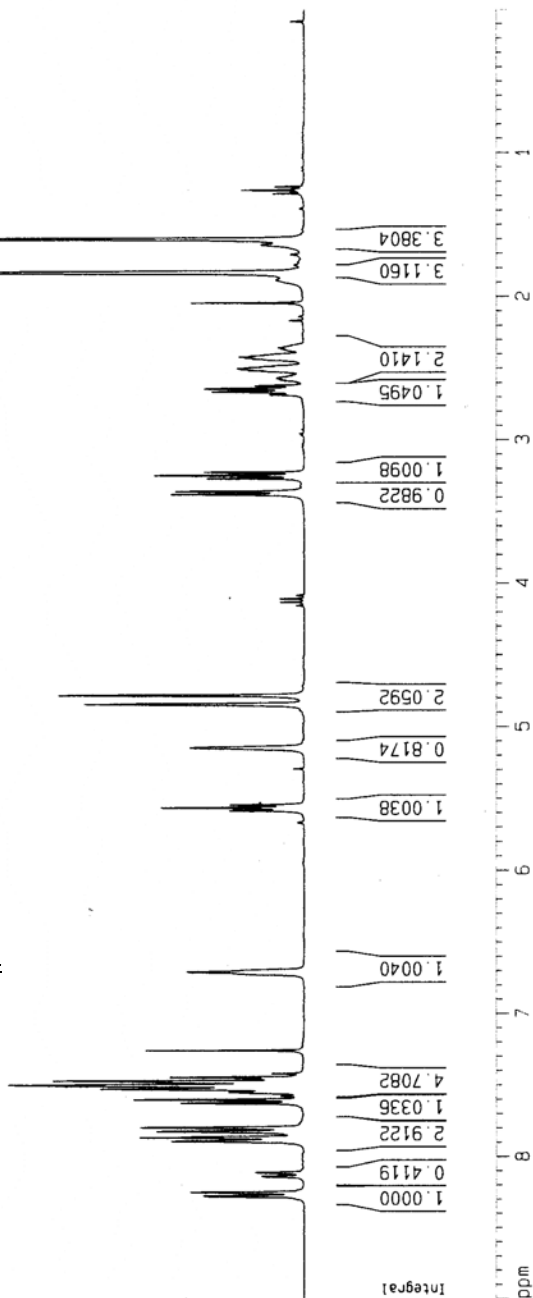

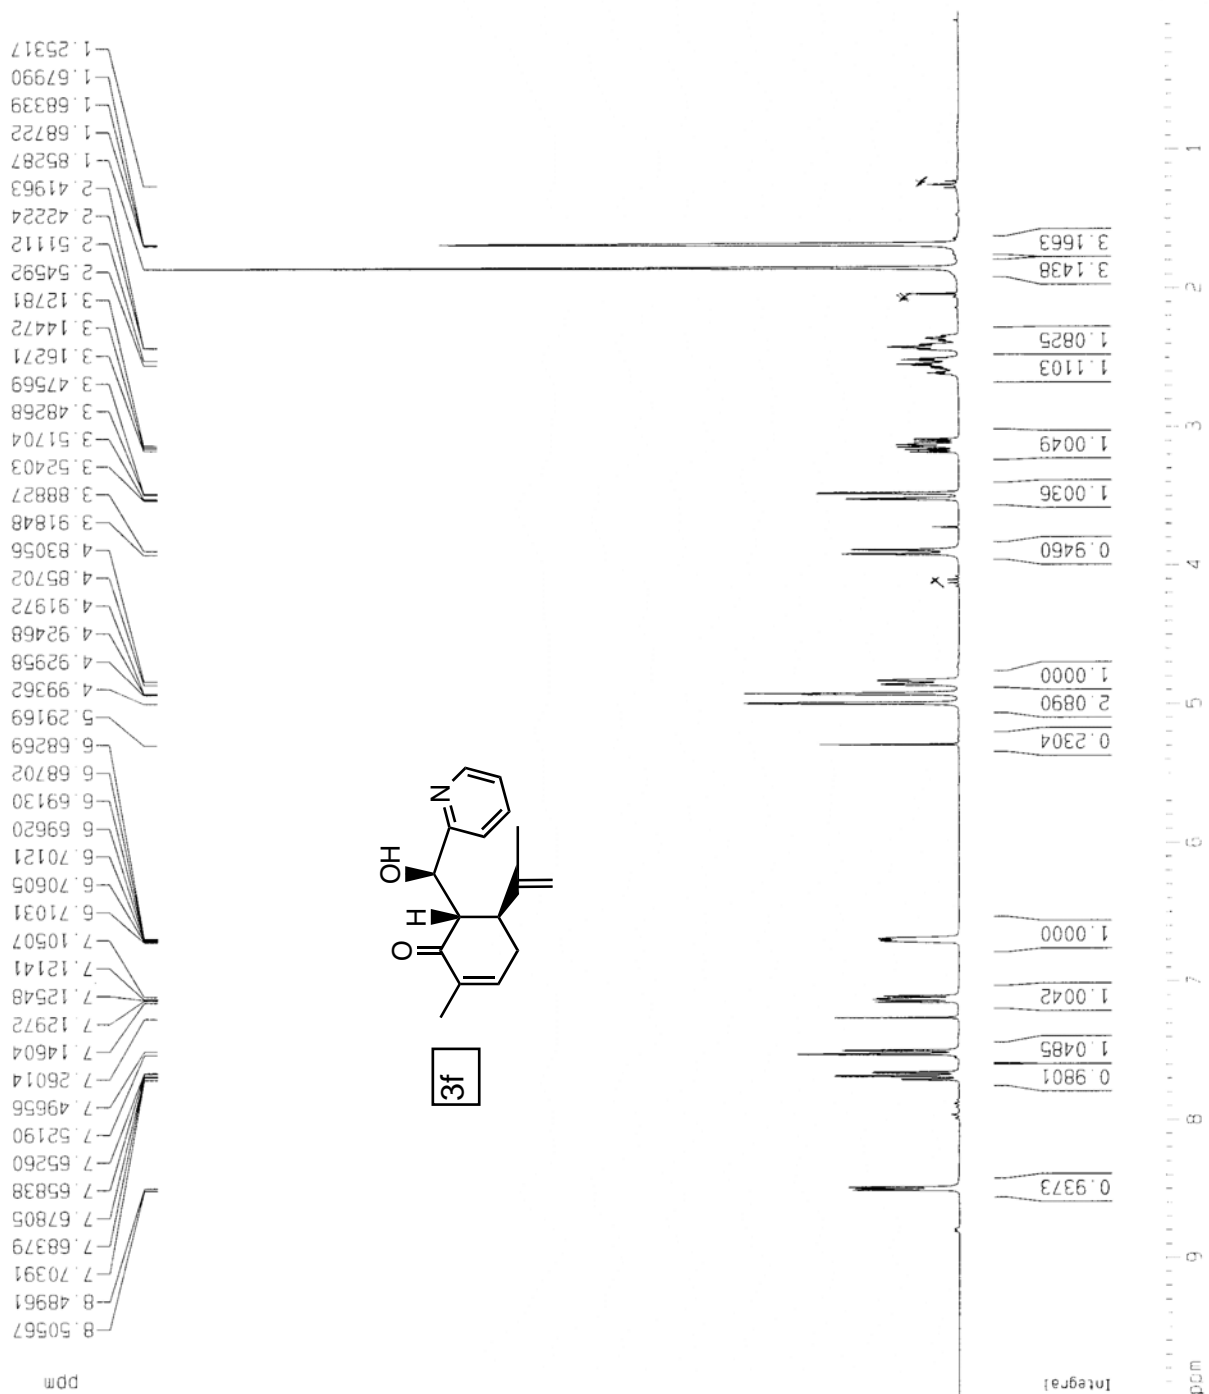

Current Data Parameters  
NAME km-1277  
EXPNO 1  
PROCNO 1

F2 - Acquisition Parameters  
Date\_ 20071117  
Time 10.28  
INSTRUM spect  
PROBHD 5 mm PABBO BB-  
PULPROG zg30  
TD 17984  
SOLVENT CDCl3  
VS 15  
DS 2  
SNH 4495.403 Hz  
FIDRES 0.250022 Hz  
AQ 1.9998708 sec  
RG 151.3  
DM 111.200 usec  
DE 5.00 usec  
TE 296.4 K  
D1 1.00000000 sec  
MCREST 0.00000000 sec  
VCMRK 0.01500000 sec

===== CHANNEL f1 =====  
NUC1 1H  
P1 12.20 usec  
PL1 -0.60 dB  
SF01 300.1321009 MHz

F2 - Processing parameters  
SI 32768  
SF 300.1300068 MHz  
WDW EM  
SSB 0  
LB 0.30 Hz  
GB 0  
PC 1.00

1D NMR plot parameters  
CX 20.00 cm  
CY 12.00 cm  
F1P 10.000 ppm  
F1 3001.30 Hz  
F2P 0.000 ppm  
F2 0.00 Hz  
PPMCM 0.50000 ppm/cm  
HZCM 150.06500 Hz/cm

Current Data Parameters

NAME km-1277  
EXPNO 2  
PROCNO 1

F2 - Acquisition Parameters

Date\_ 20071118

Time 9.44

INSTRUM spect

PROBHD 5 mm PABBO BB-

PULPROG zgpg30

TD 36230

SOLVENT CDCl3

NS 2000

DS 4

SWH 18115.941 Hz

FIDRES 0.500026 Hz

AQ 0.9899980 sec

RG 26008

IN 27.600 usec

DE 6.00 usec

TE 297.1 K

DI 2.00000000 sec

d11 0.03000000 sec

DELTA 1.89999998 sec

MCREST 0.00000000 sec

MCWRR 0.01500000 sec

3f

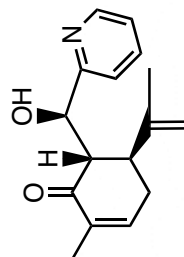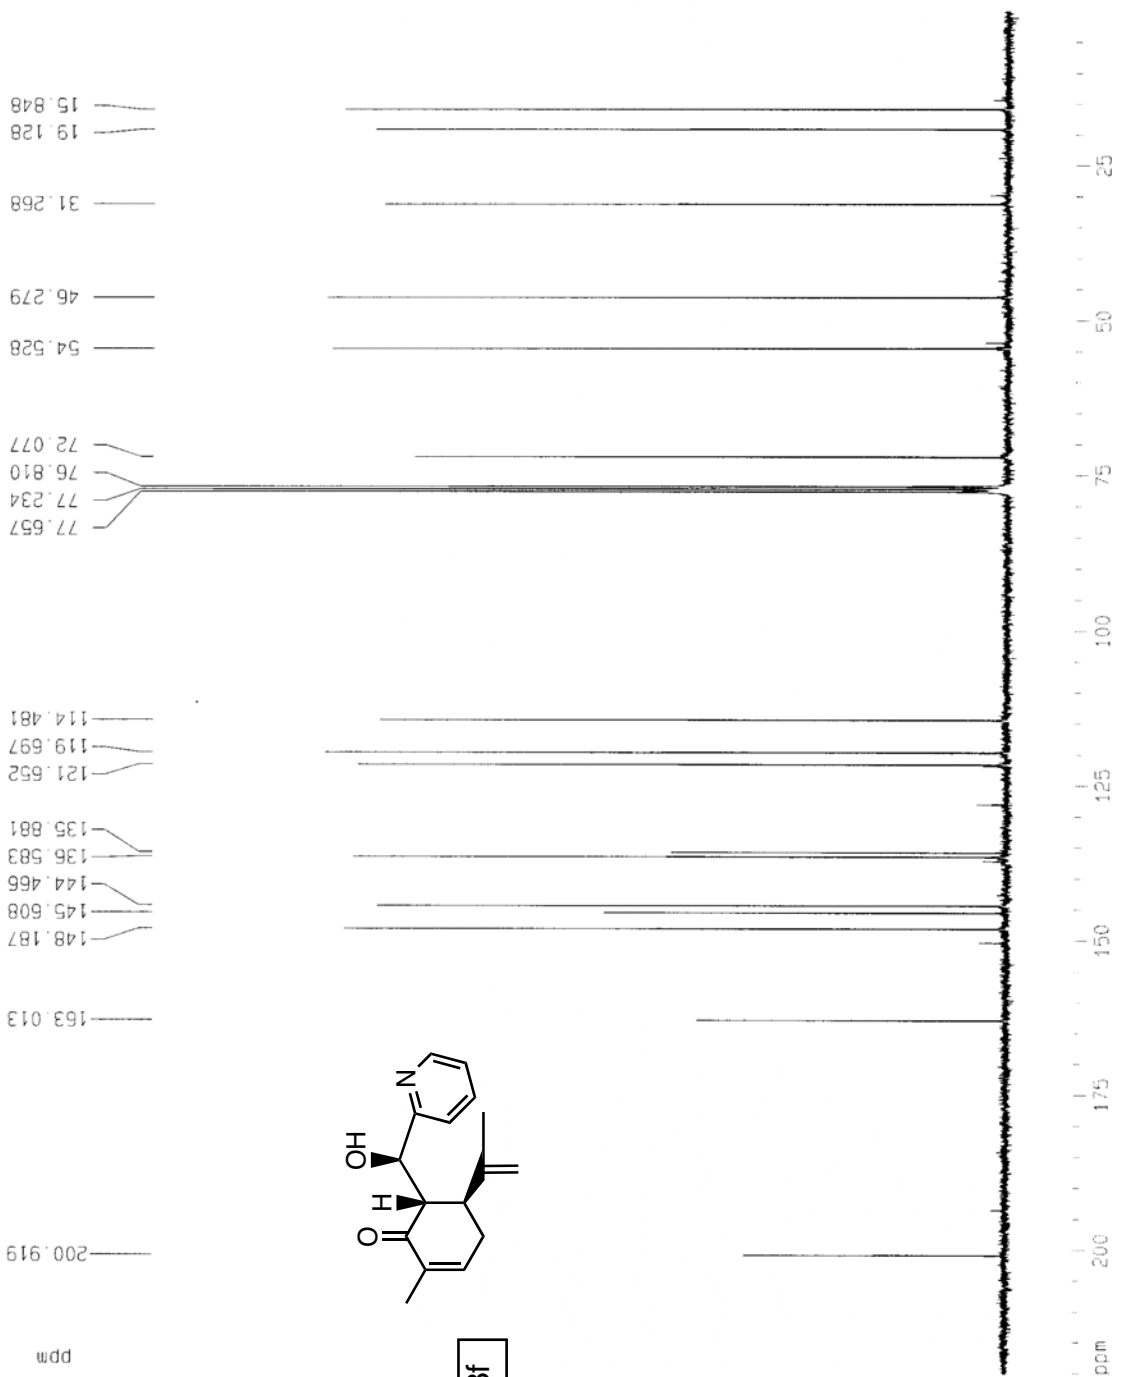

===== CHANNEL f1 =====  
NUC1 13C  
P1 8.38 usec  
PL1 -2.80 dB  
SF01 75.4752953 MHz

===== CHANNEL f2 =====  
CPDPRG2 waltz16  
NUC2 1H  
PCPD2 80.00 usec  
PL2 -0.60 dB  
PL12 15.73 dB  
PL13 16.00 dB  
SF02 300.1312005 MHz

F2 - Processing parameters  
SI 32768  
SF 75.4677354 MHz  
WDW EM  
SSB 0  
LB 1.00 Hz  
GB 0  
PC 1.40

10 NMR plot parameters  
CX 20.00 cm  
CY 10.00 cm  
FIP 220.199 ppm  
F1 16617.88 Hz  
F2 -0.000 ppm  
F2 -0.00 Hz  
PHCM 11.00992 ppm/cm  
HZCM 830.89410 Hz/cm

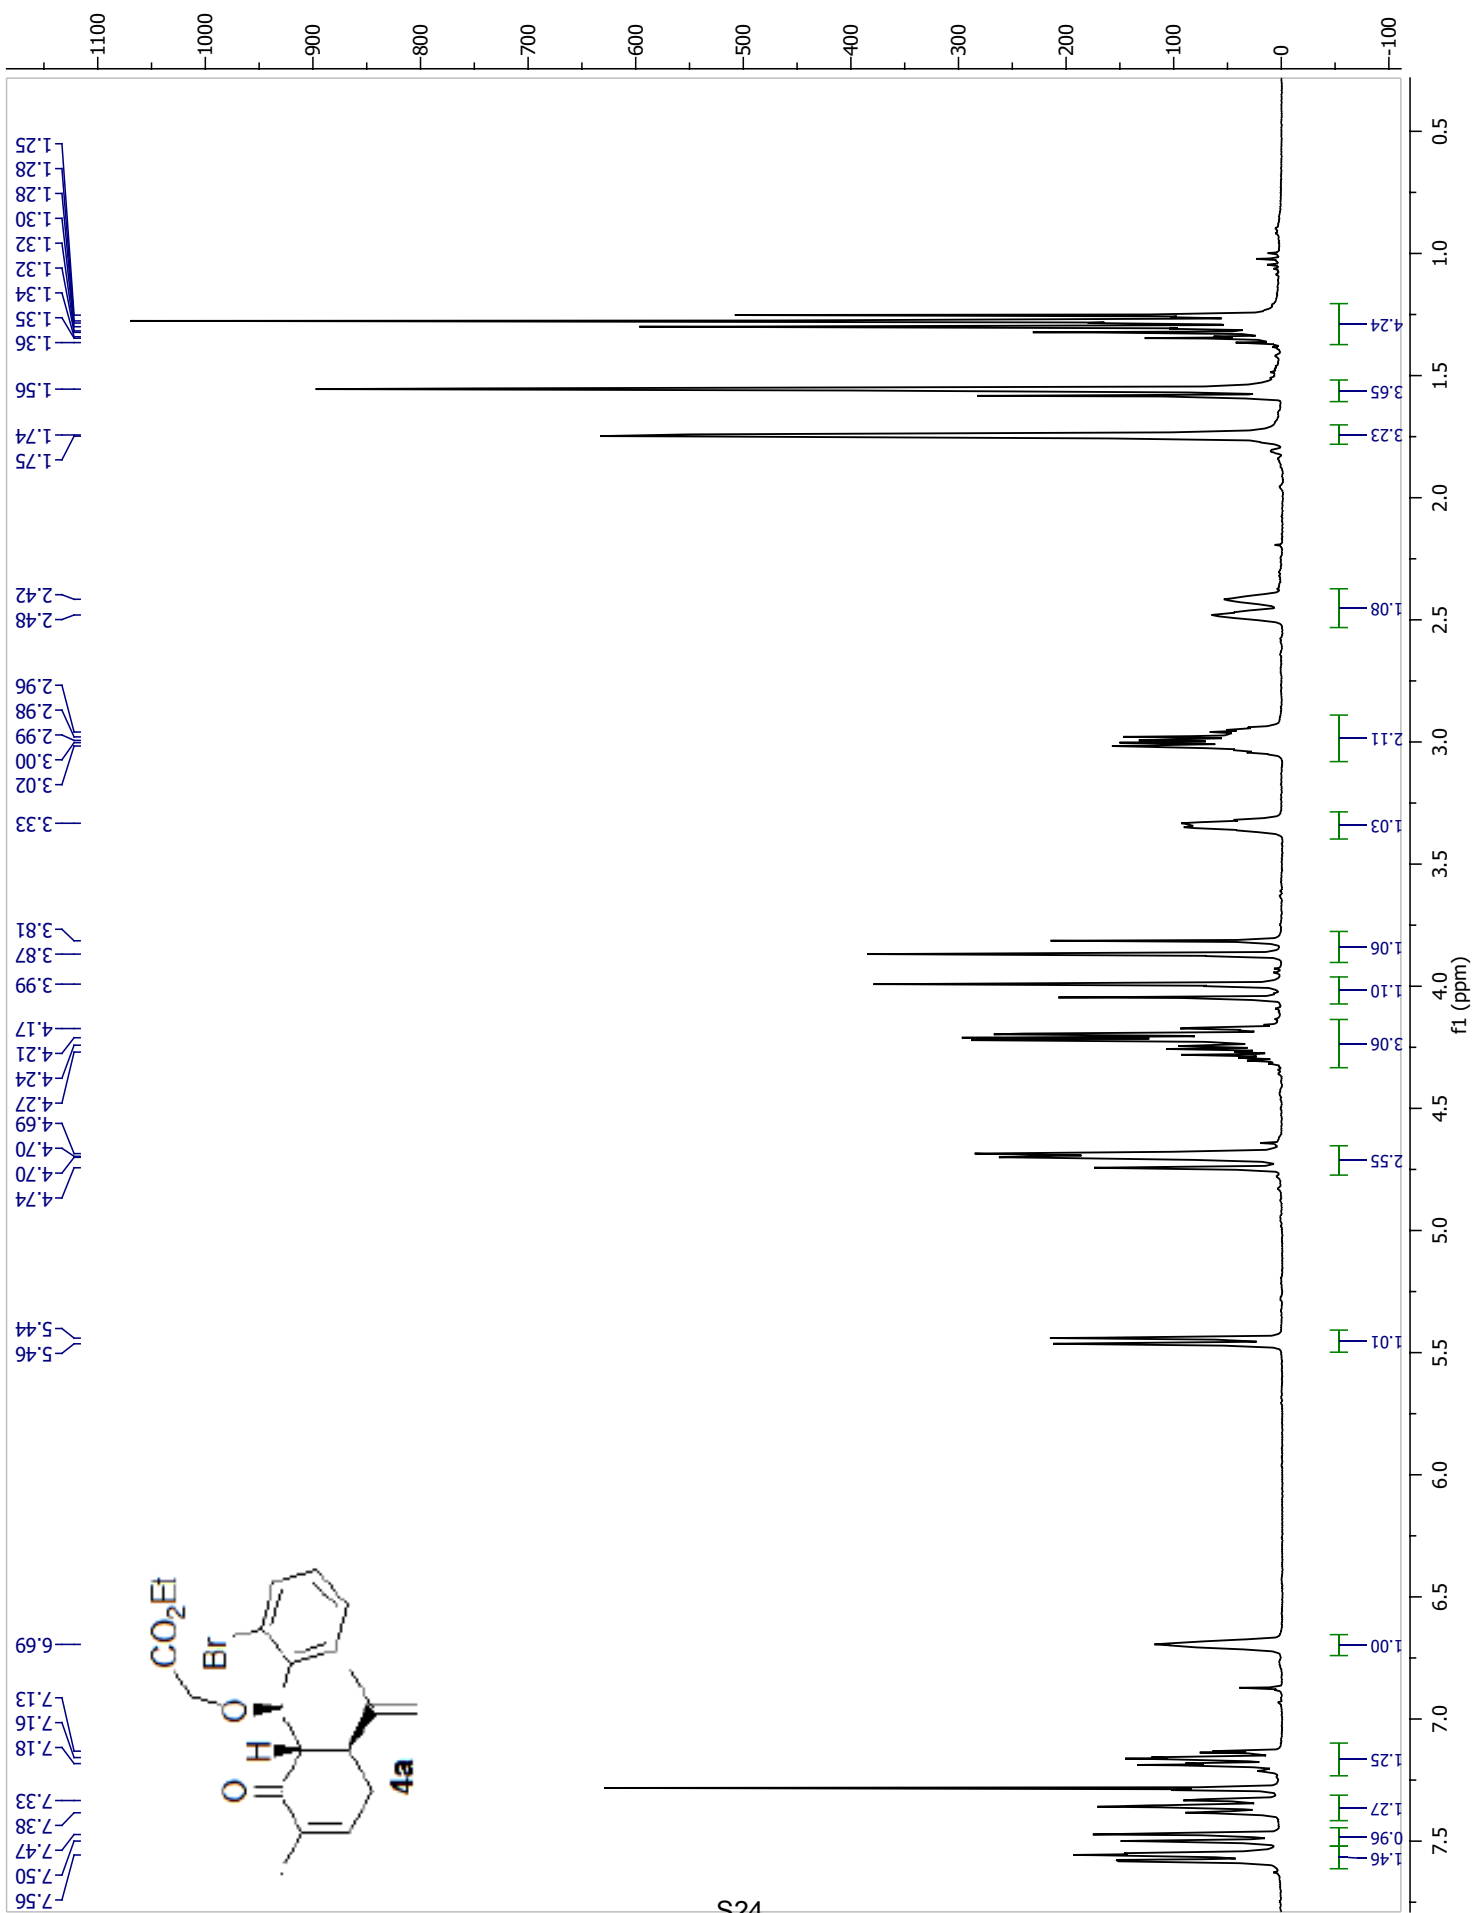

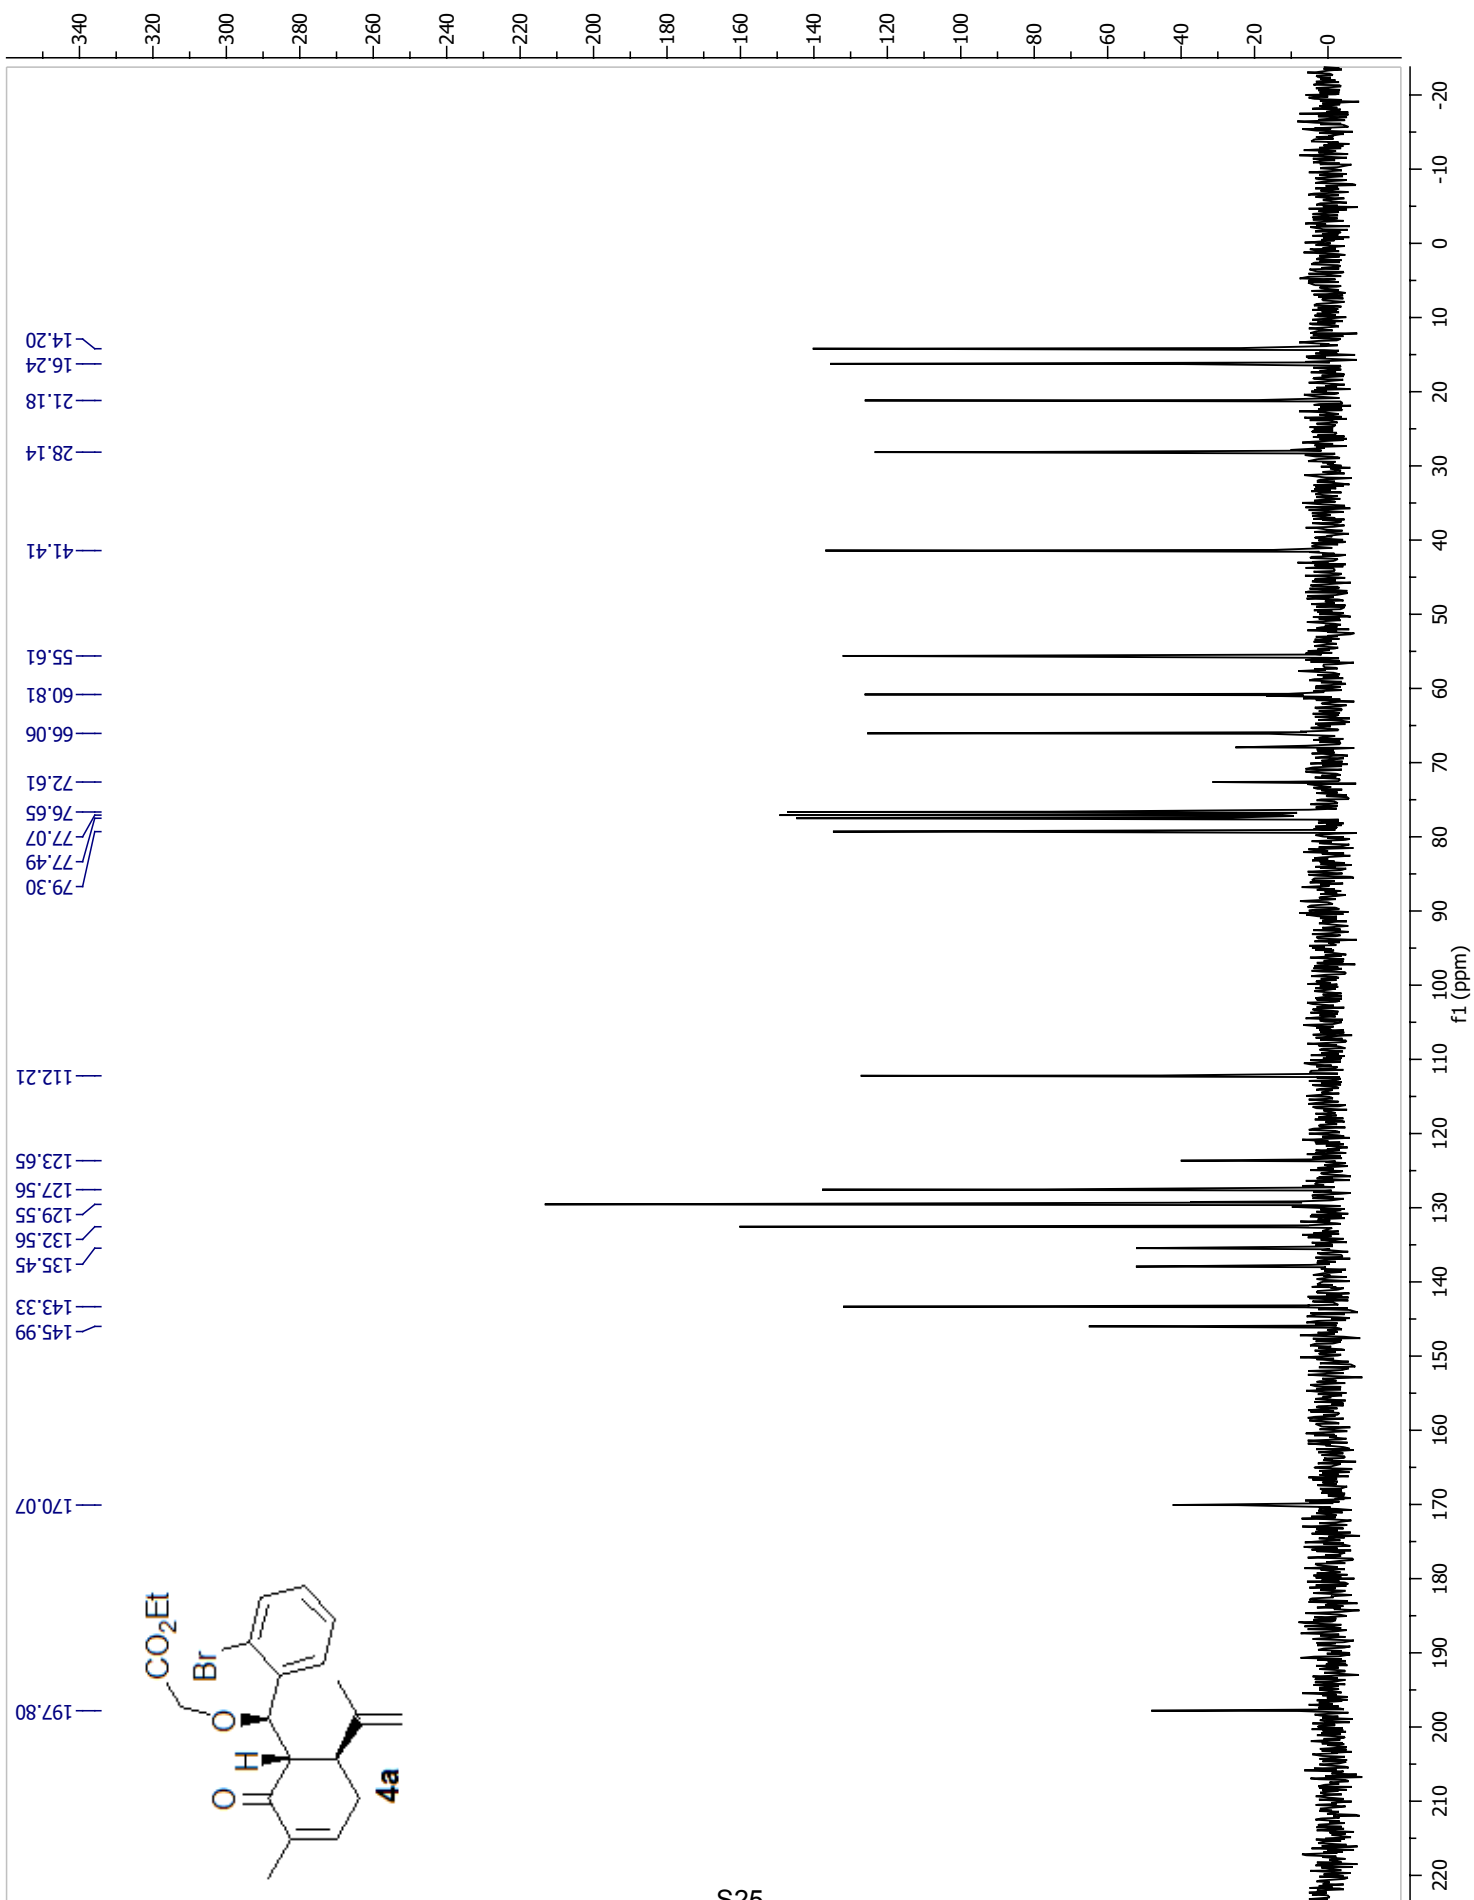

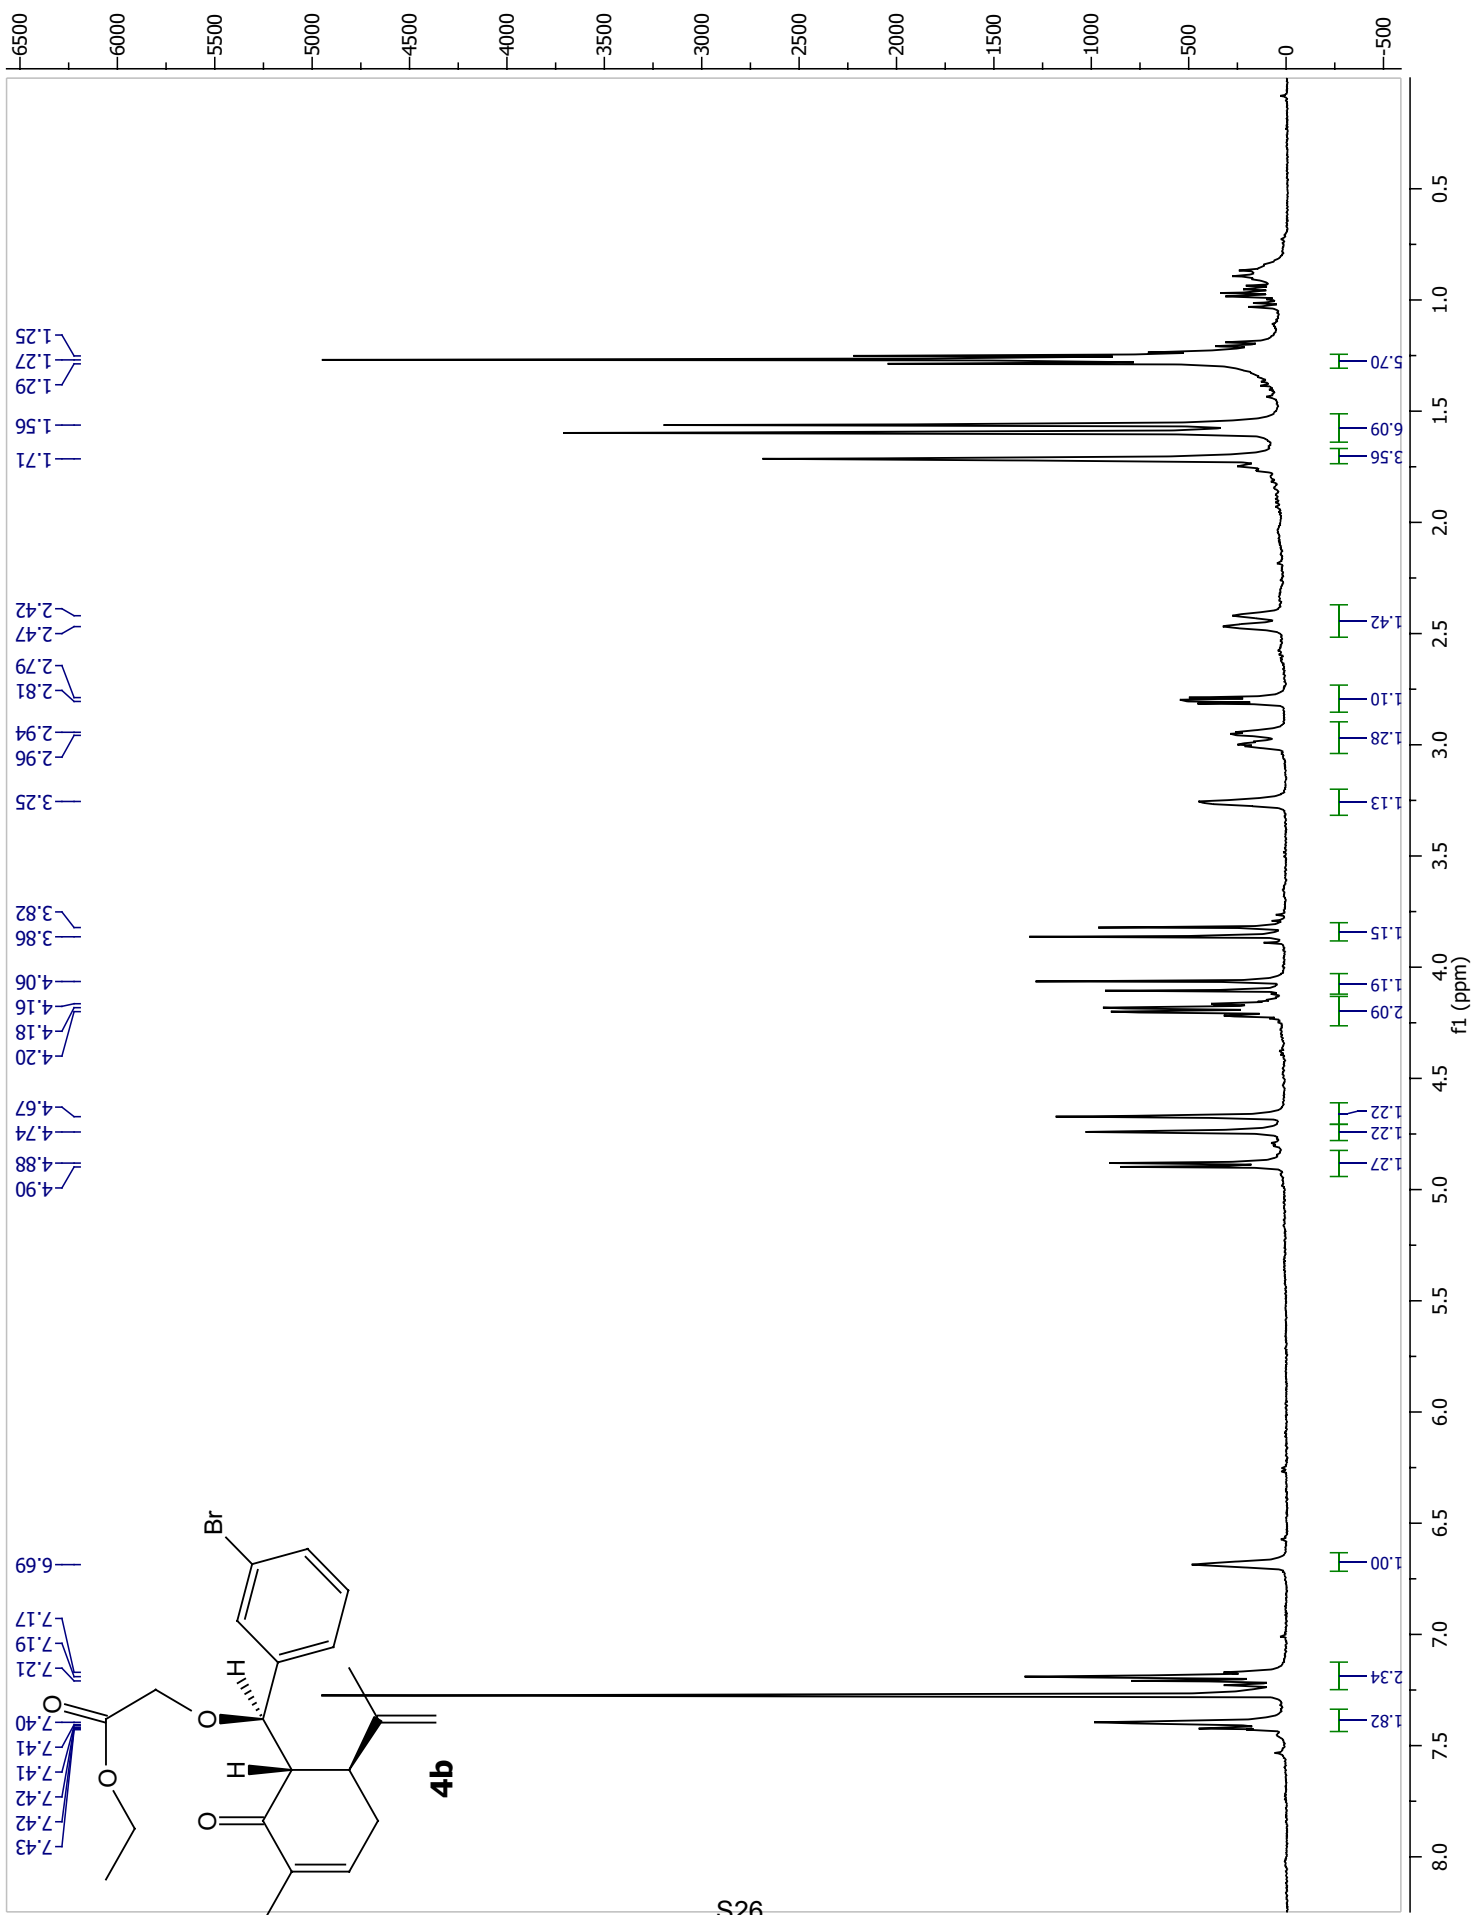

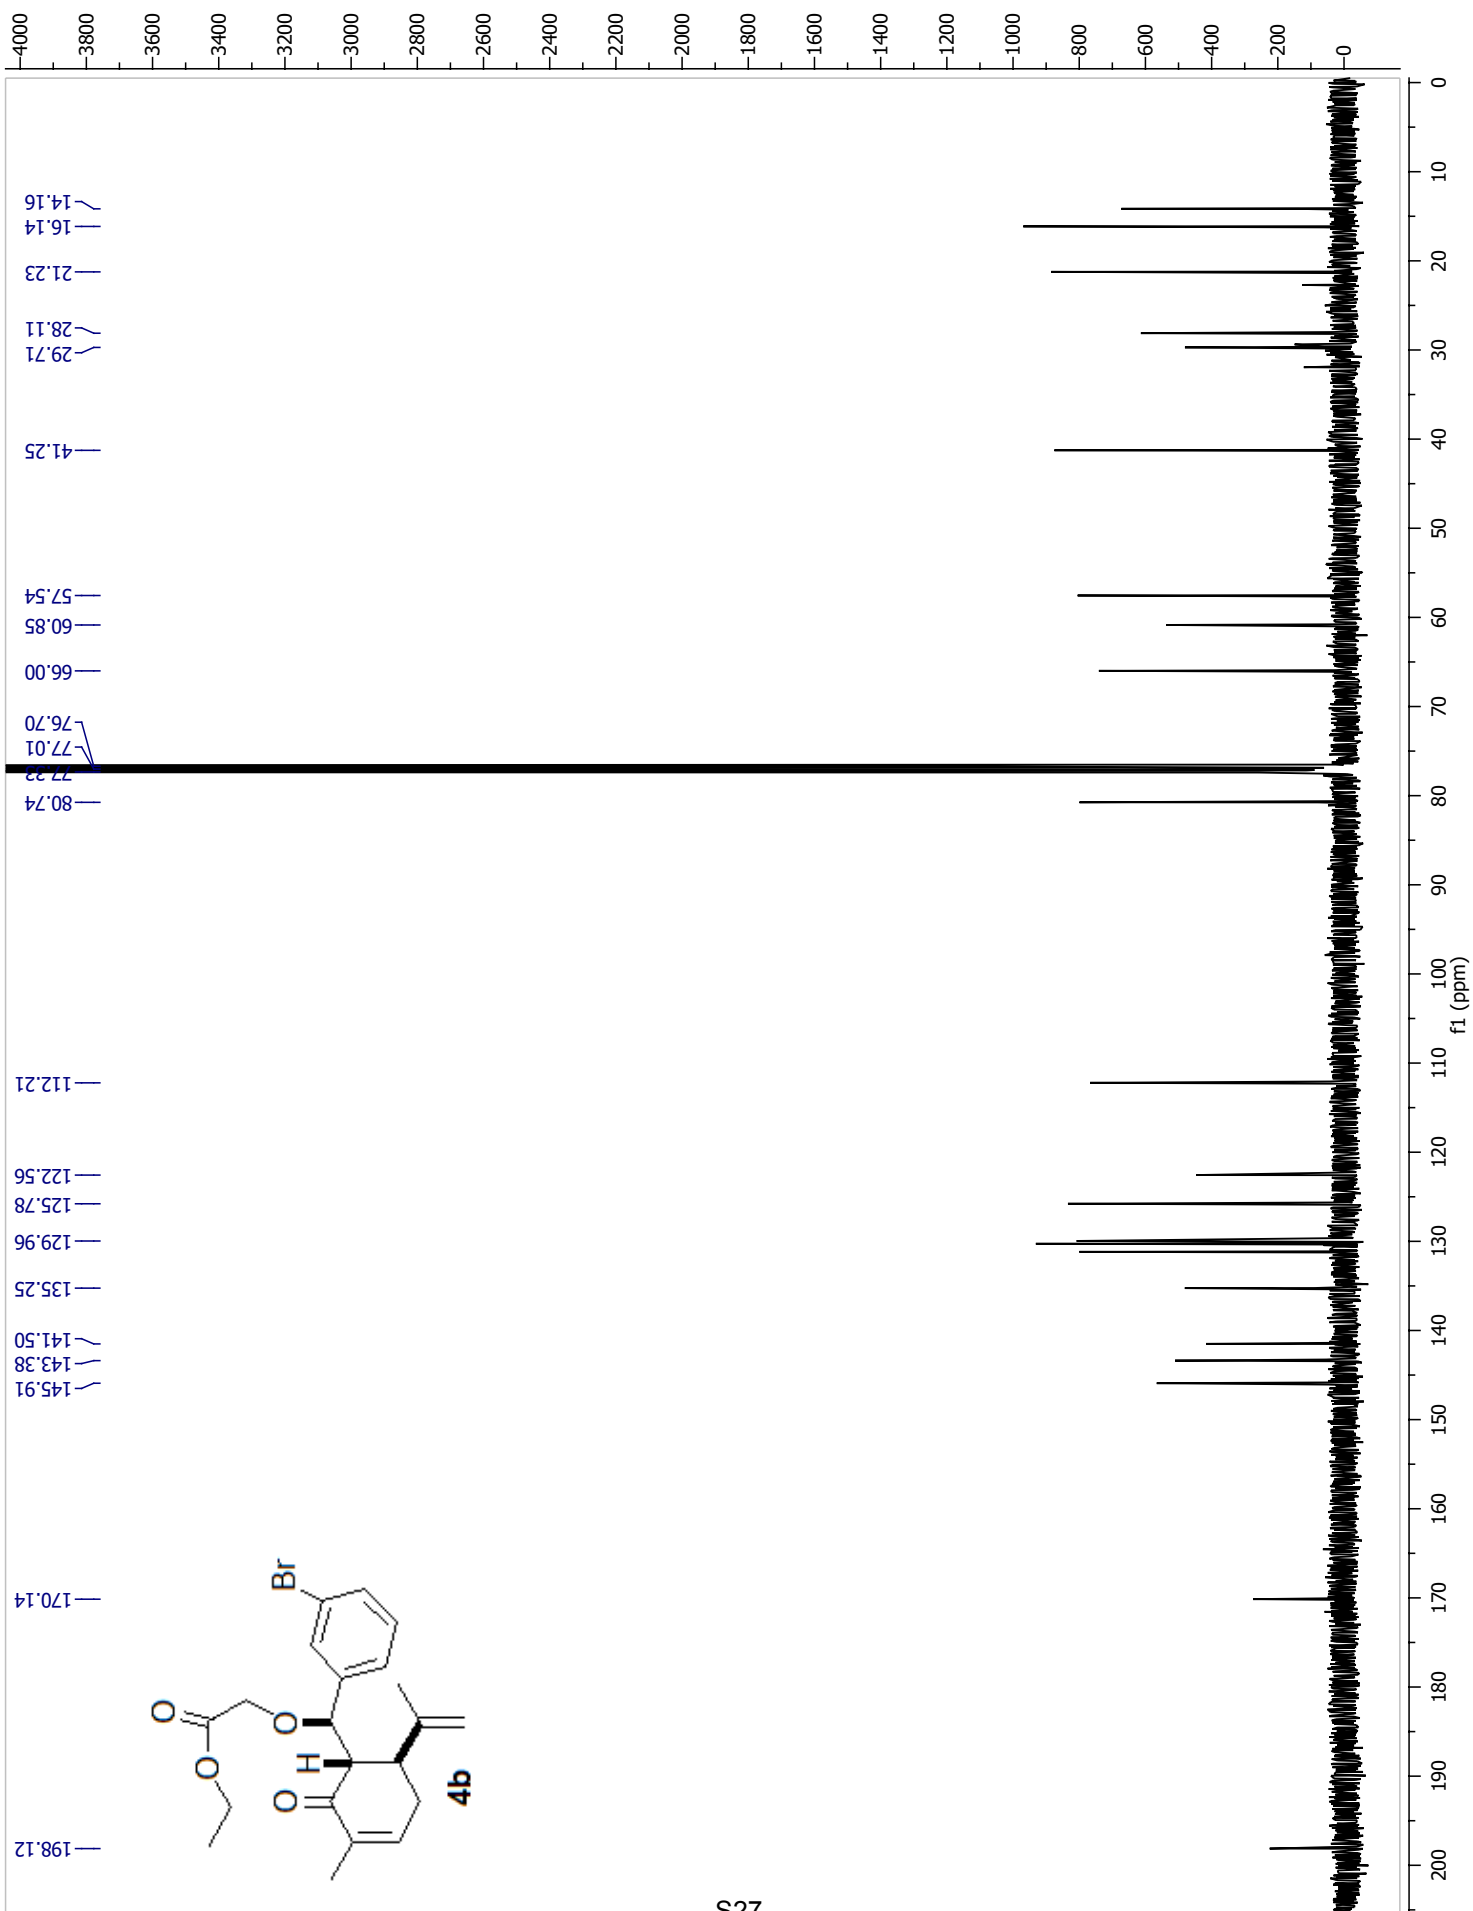

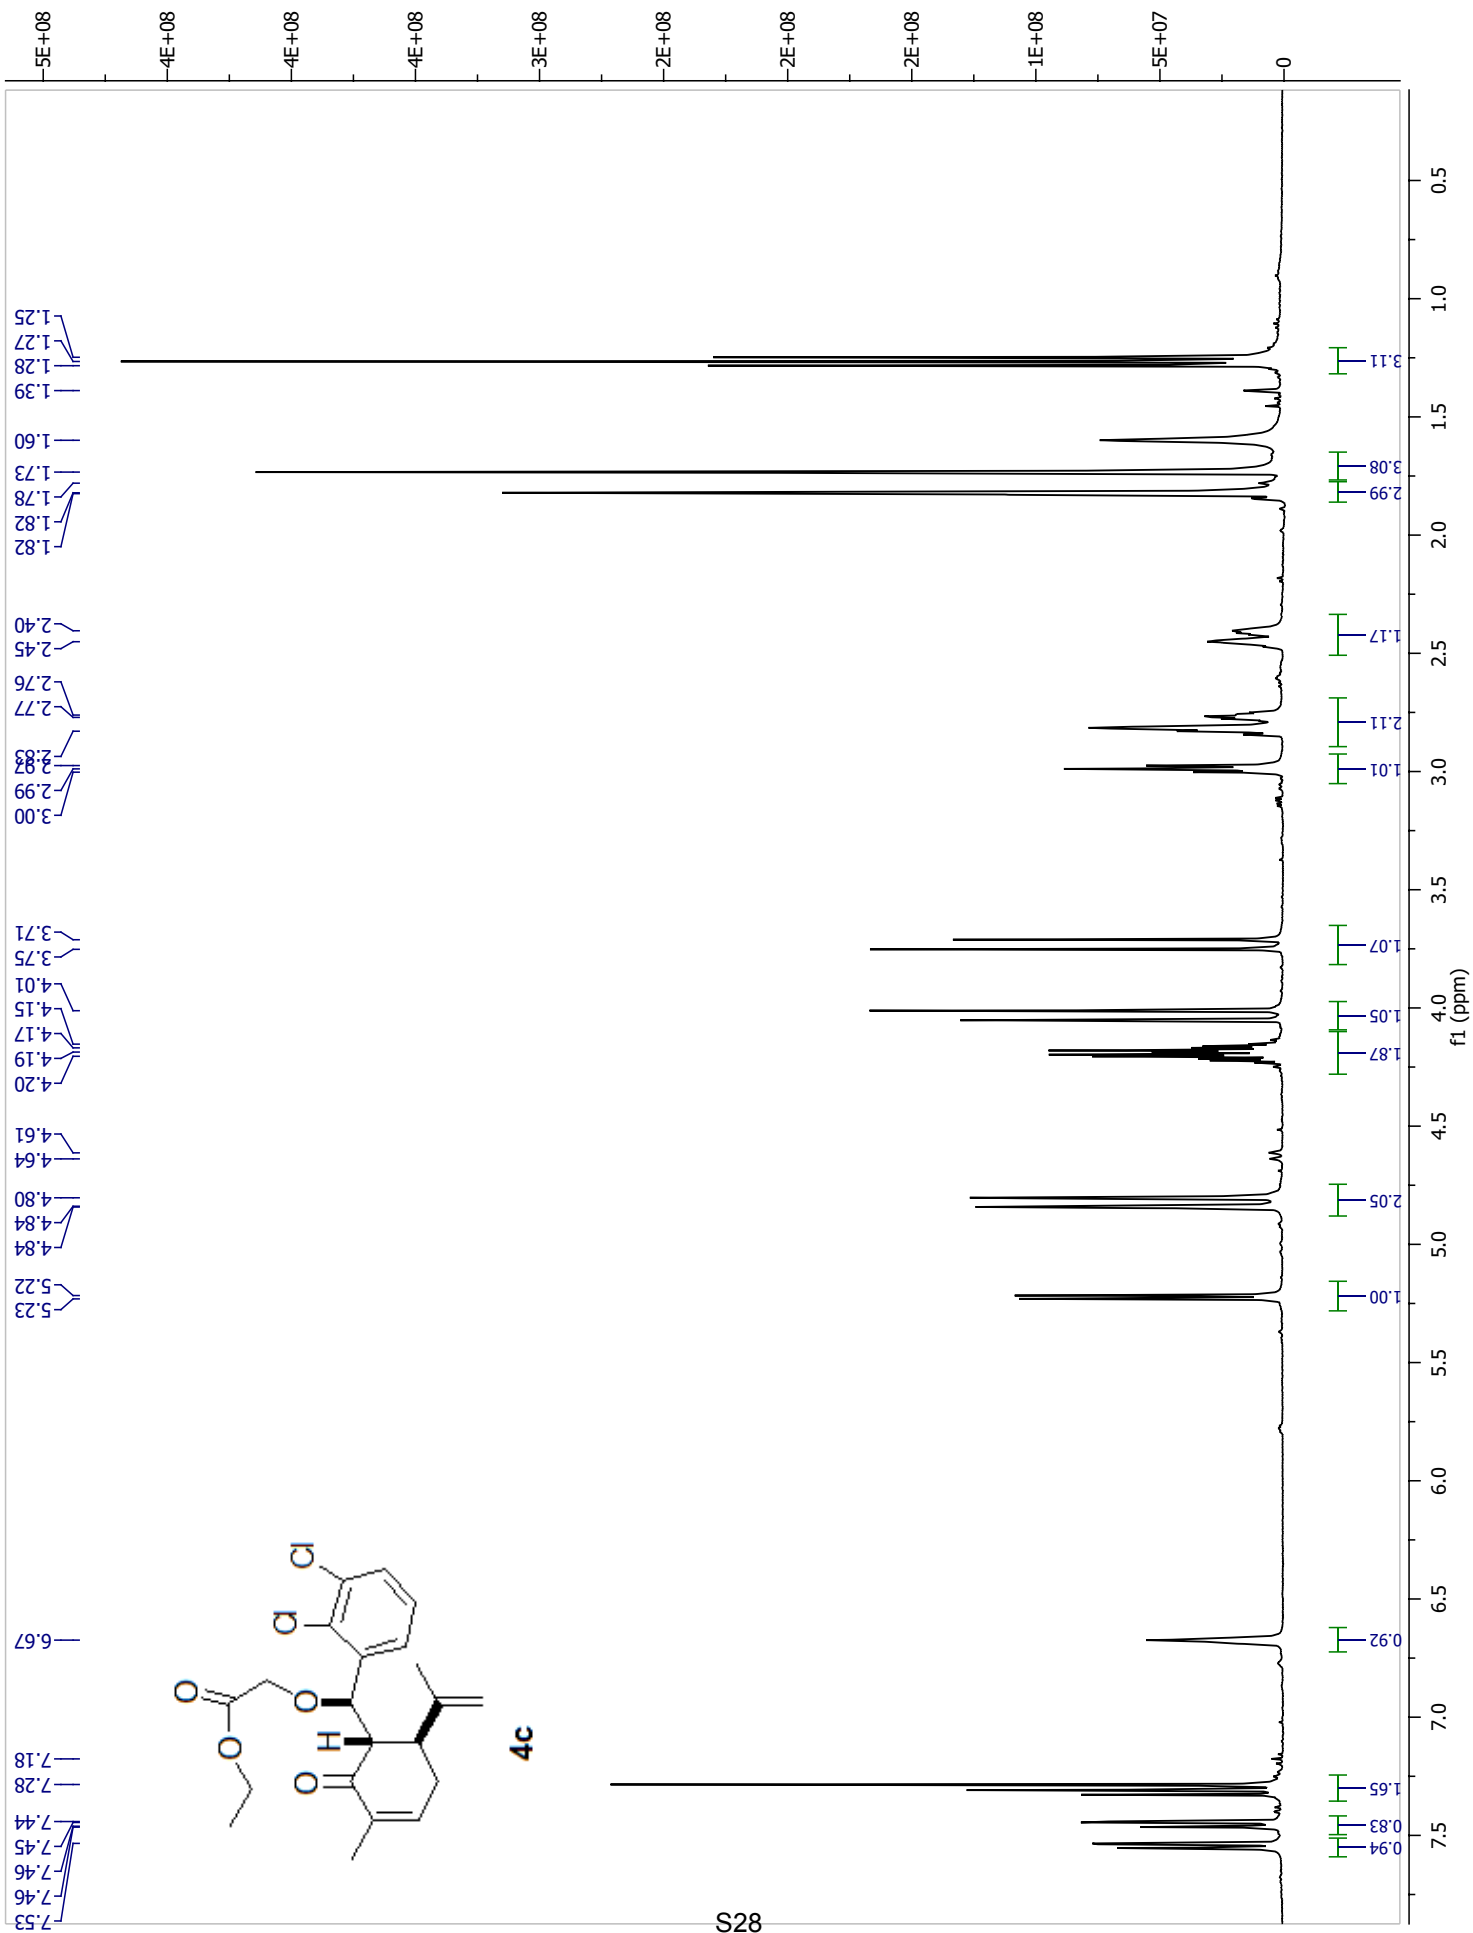

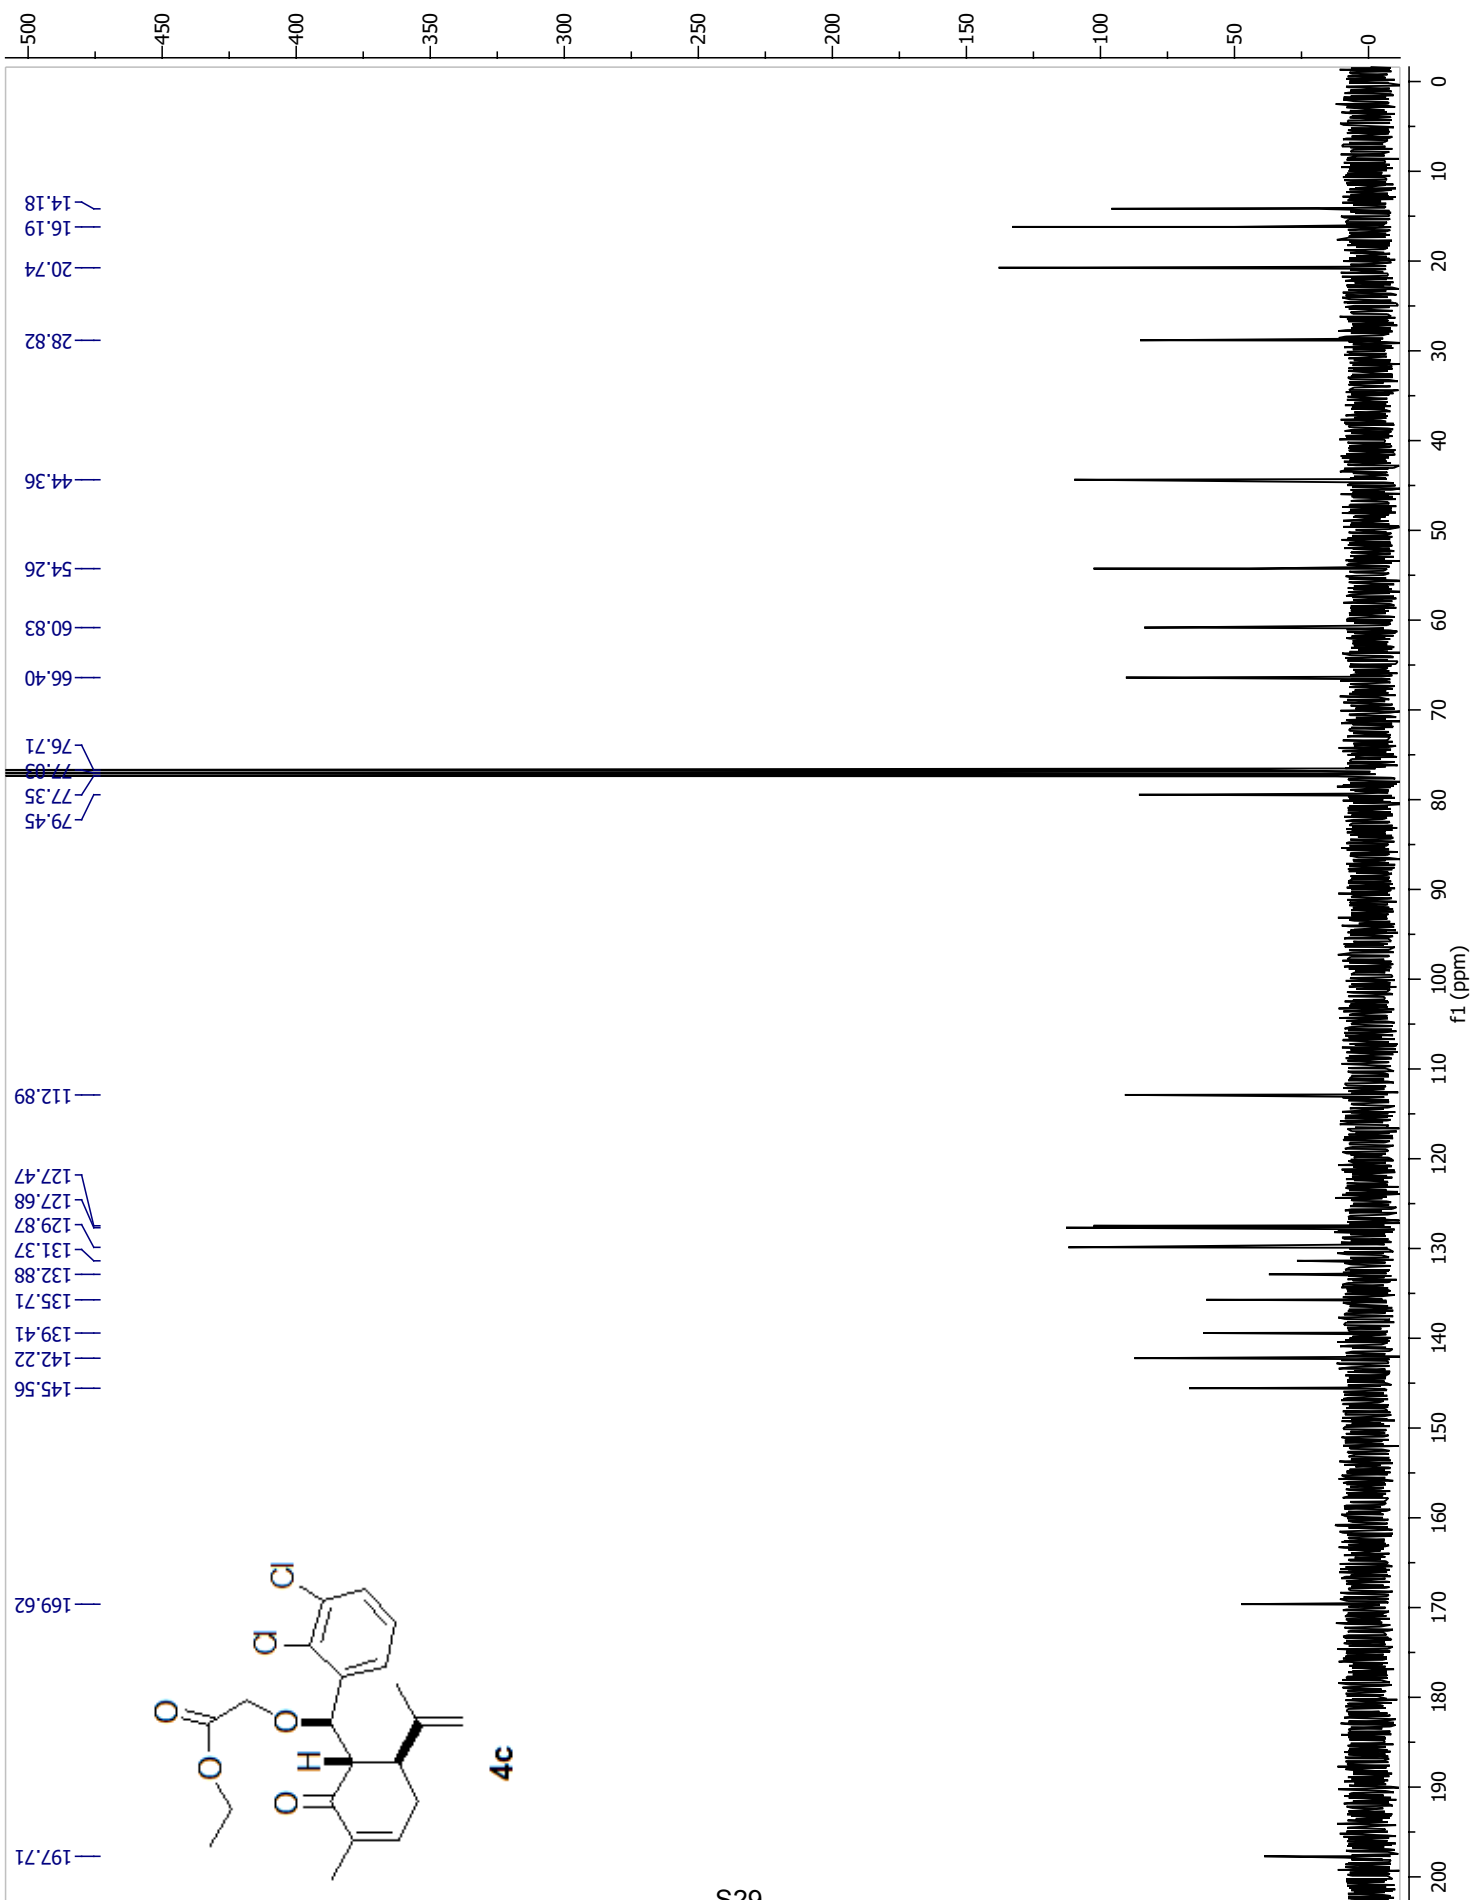

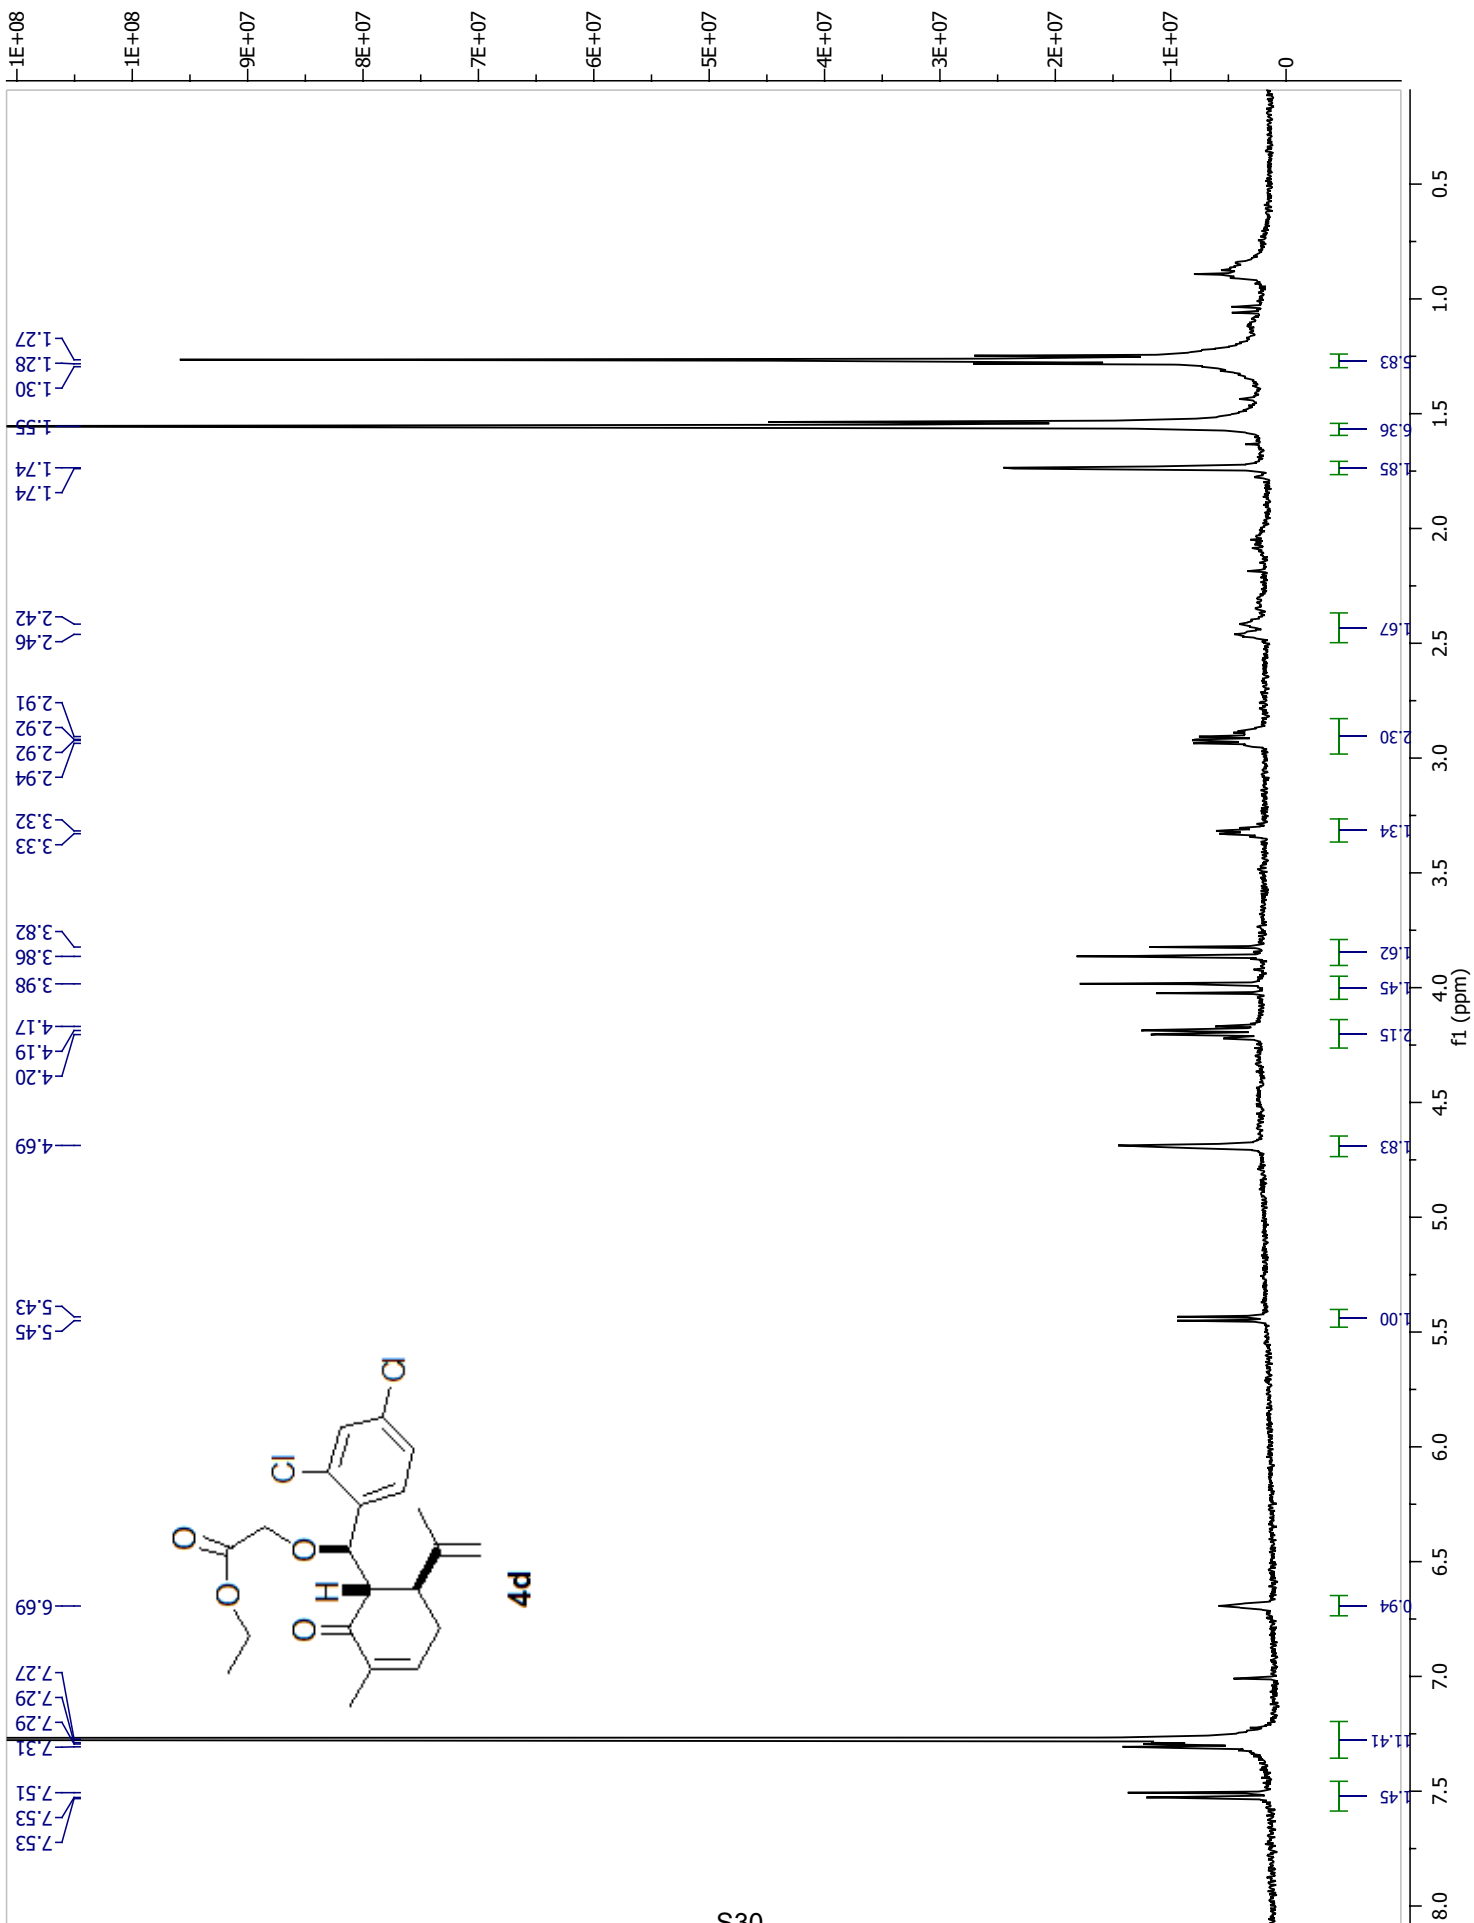

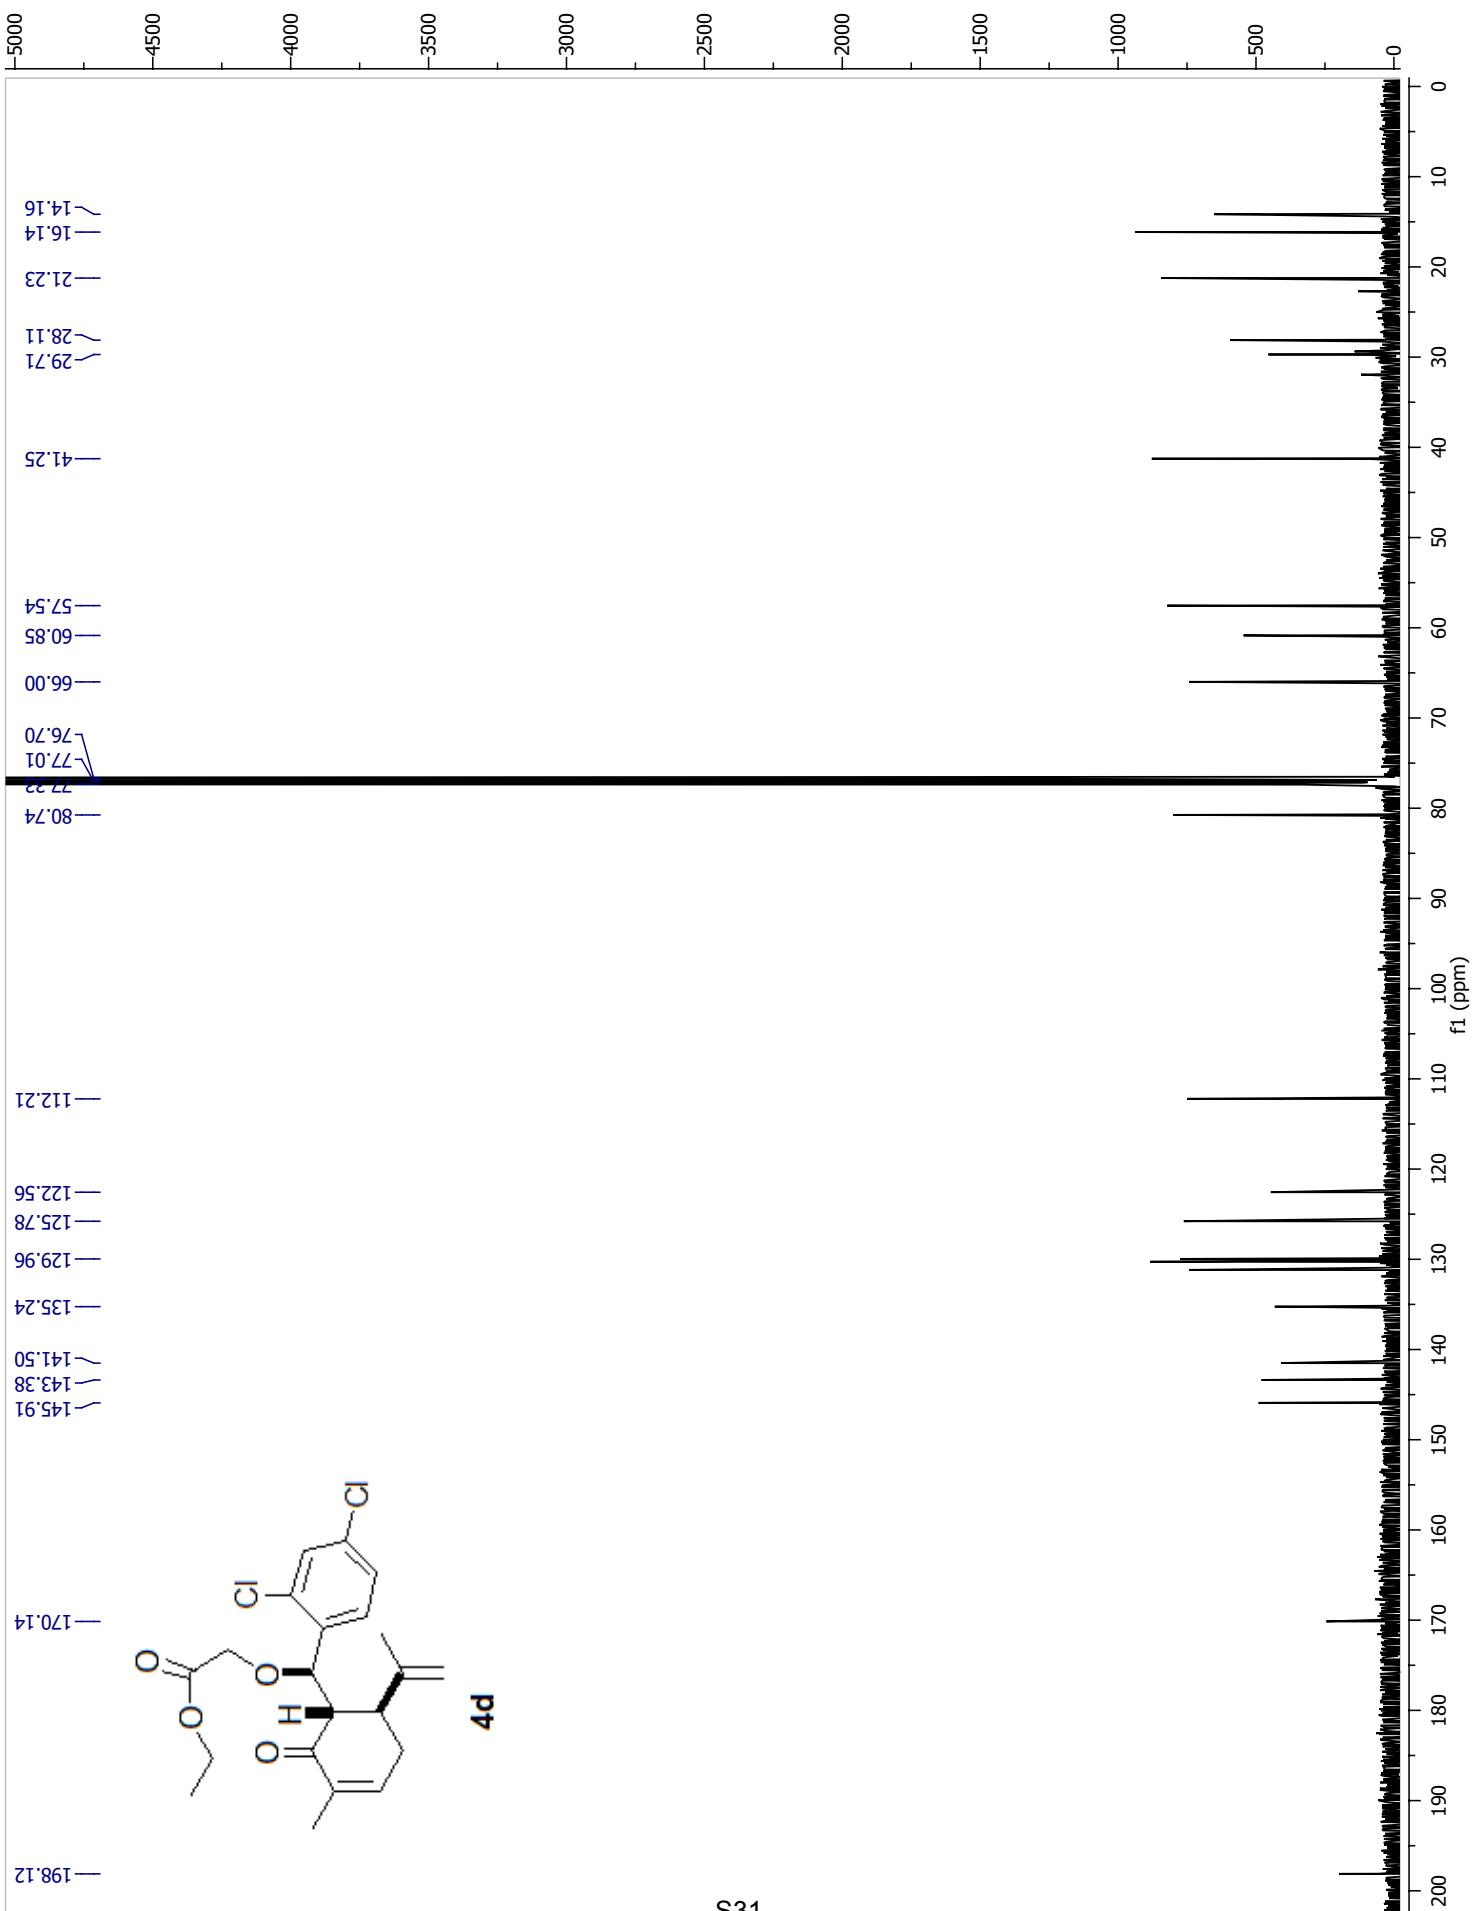

Current Data Parameters  
 NAME km-1387  
 EXPNO 3  
 PROCNO 1

F2 - Acquisition Parameters  
 Date\_ 20080313  
 Time 11.13  
 INSTRUM spect  
 PROBHD 5 mm PABBO BB-  
 PULPROG zg30  
 TO 23980  
 SOLVENT CDCl3  
 NS 16  
 DS 2  
 SWH 5995.204 Hz  
 FIDRES 0.250008 Hz  
 AQ 1.999820 sec  
 RG 90.5  
 DW 83.400 usec  
 DE 6.00 usec  
 TE 296.5 K  
 D1 1.0000000 sec  
 MCREST 0.0000000 sec  
 MCWRR 0.0150000 sec

===== CHANNEL f1 =====  
 NUC1 1H  
 P1 12.20 usec  
 PL1 -1.00 dB  
 SF01 300.1318508 MHz

F2 - Processing parameters  
 SI 32768  
 SF 300.1300065 MHz  
 WDW EM  
 SSB 0  
 LB 0.30 Hz  
 GB 0  
 PC 1.00

1D NMR plot parameters  
 CX 20.00 cm  
 CY 12.00 cm  
 F1P 9.000 ppm  
 F1 2701.17 Hz  
 F2P 0.000 ppm  
 F2 0.00 Hz  
 PPMCM 0.45000 ppm/cm  
 HZCM 135.05850 Hz/cm

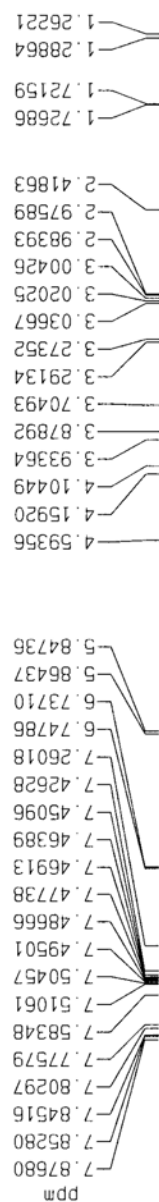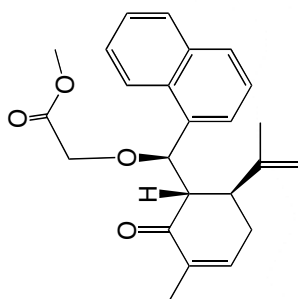

4e

Current Data Parameters  
NAME km-1387  
EXPNO 2  
PROCNO 1

F2 - Acquisition Parameters  
Date\_ 20080313  
Time 7.11  
INSTRUM spect  
PROBHD 5 mm PABBO BB-  
PULPROG zgpg30  
TD 36230  
SOLVENT CDCl3  
NS 16000  
DS 4  
SWH 18115.941 Hz  
FIDRES 0.500026 Hz  
AQ 0.9999980 sec  
RG 14596.5  
DM 27.600 usec  
DE 6.00 usec  
TE 297.0 K  
D1 2.00000000 sec  
d11 0.03000000 sec  
DELTA 1.89999998 sec  
MCREST 0.00000000 sec  
MCNMRK 0.01500000 sec

===== CHANNEL f1 =====  
NUC1 13C  
P1 8.38 usec  
PL1 -2.80 dB  
SF01 75.4760505 MHz

===== CHANNEL f2 =====  
CPDPRG2 waltz16  
NUC2 1H  
PCPD2 80.00 usec  
PL2 -1.00 dB  
PL12 15.33 dB  
PL13 16.00 dB  
SF02 300.1312005 MHz

F2 - Processing parameters  
SI 32768  
SF 75.4677359 MHz  
WDW EM  
SSB 0  
LB 1.00 Hz  
GB 0  
PC 1.40

10 NMR plot parameters  
CX 20.00 cm  
CY 10.00 cm  
F1P 220.000 ppm  
F1 16602.90 Hz  
F2P 0.000 ppm  
F2 0.00 Hz  
PPMCM 11.00000 ppm/cm  
HZCM 830.14508 Hz/cm

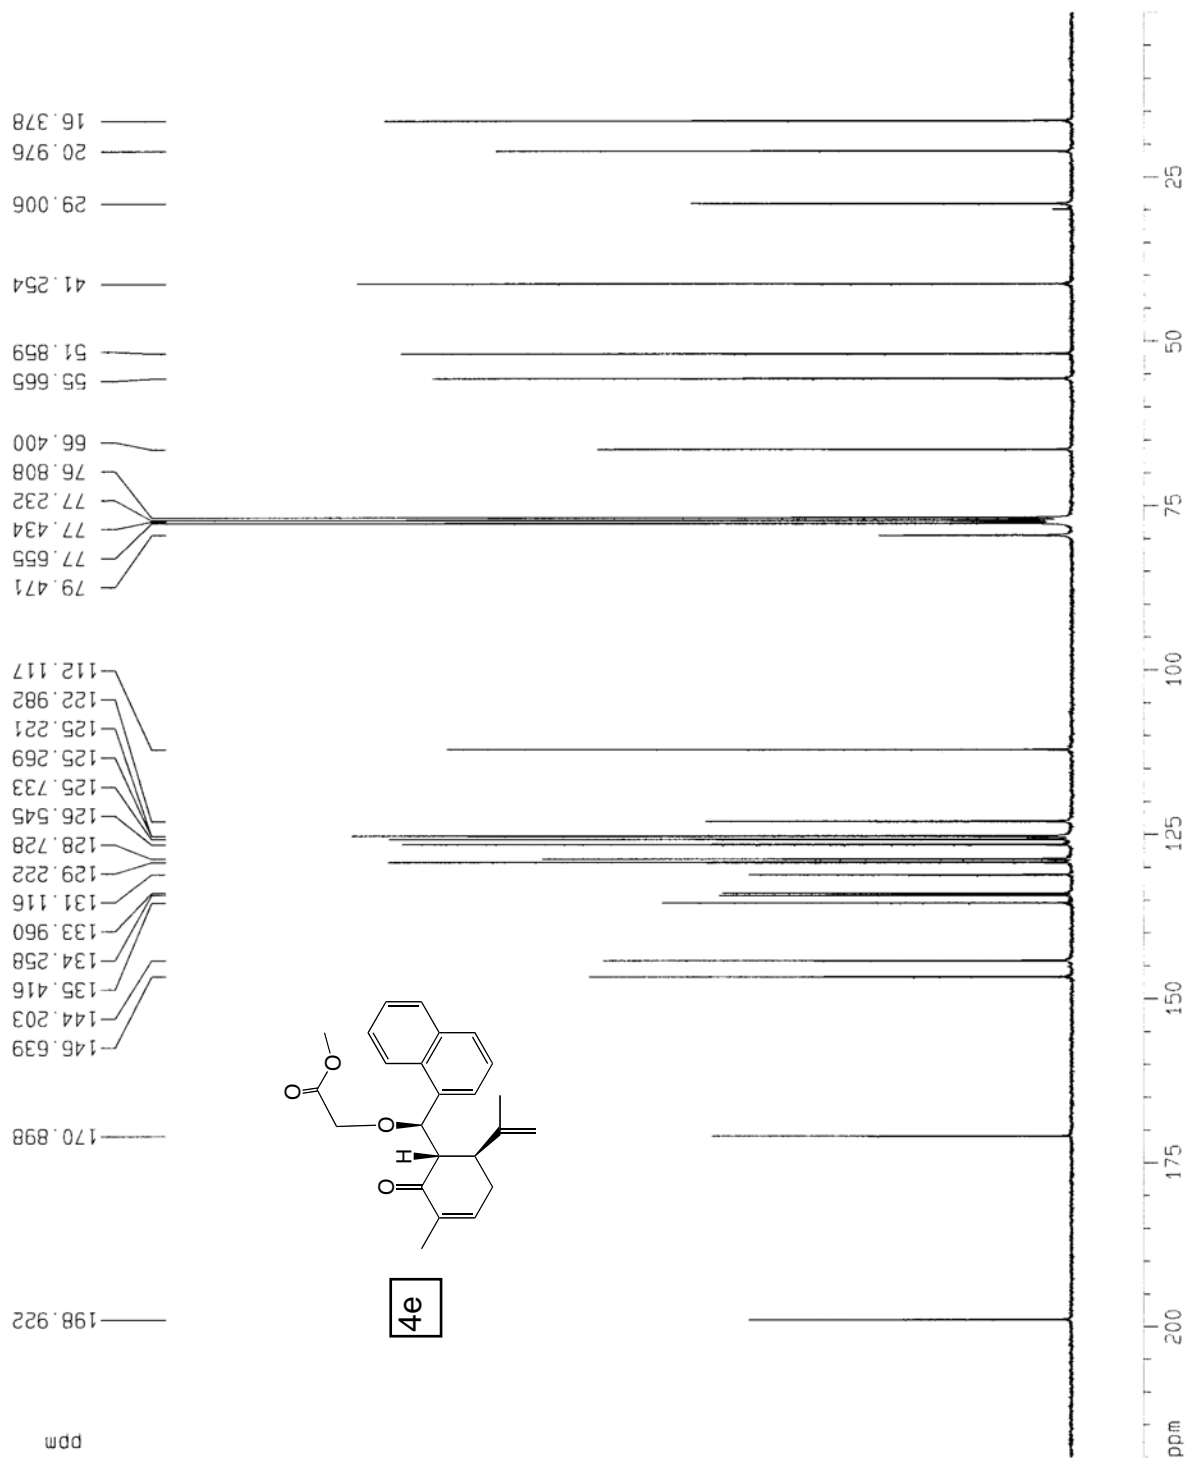

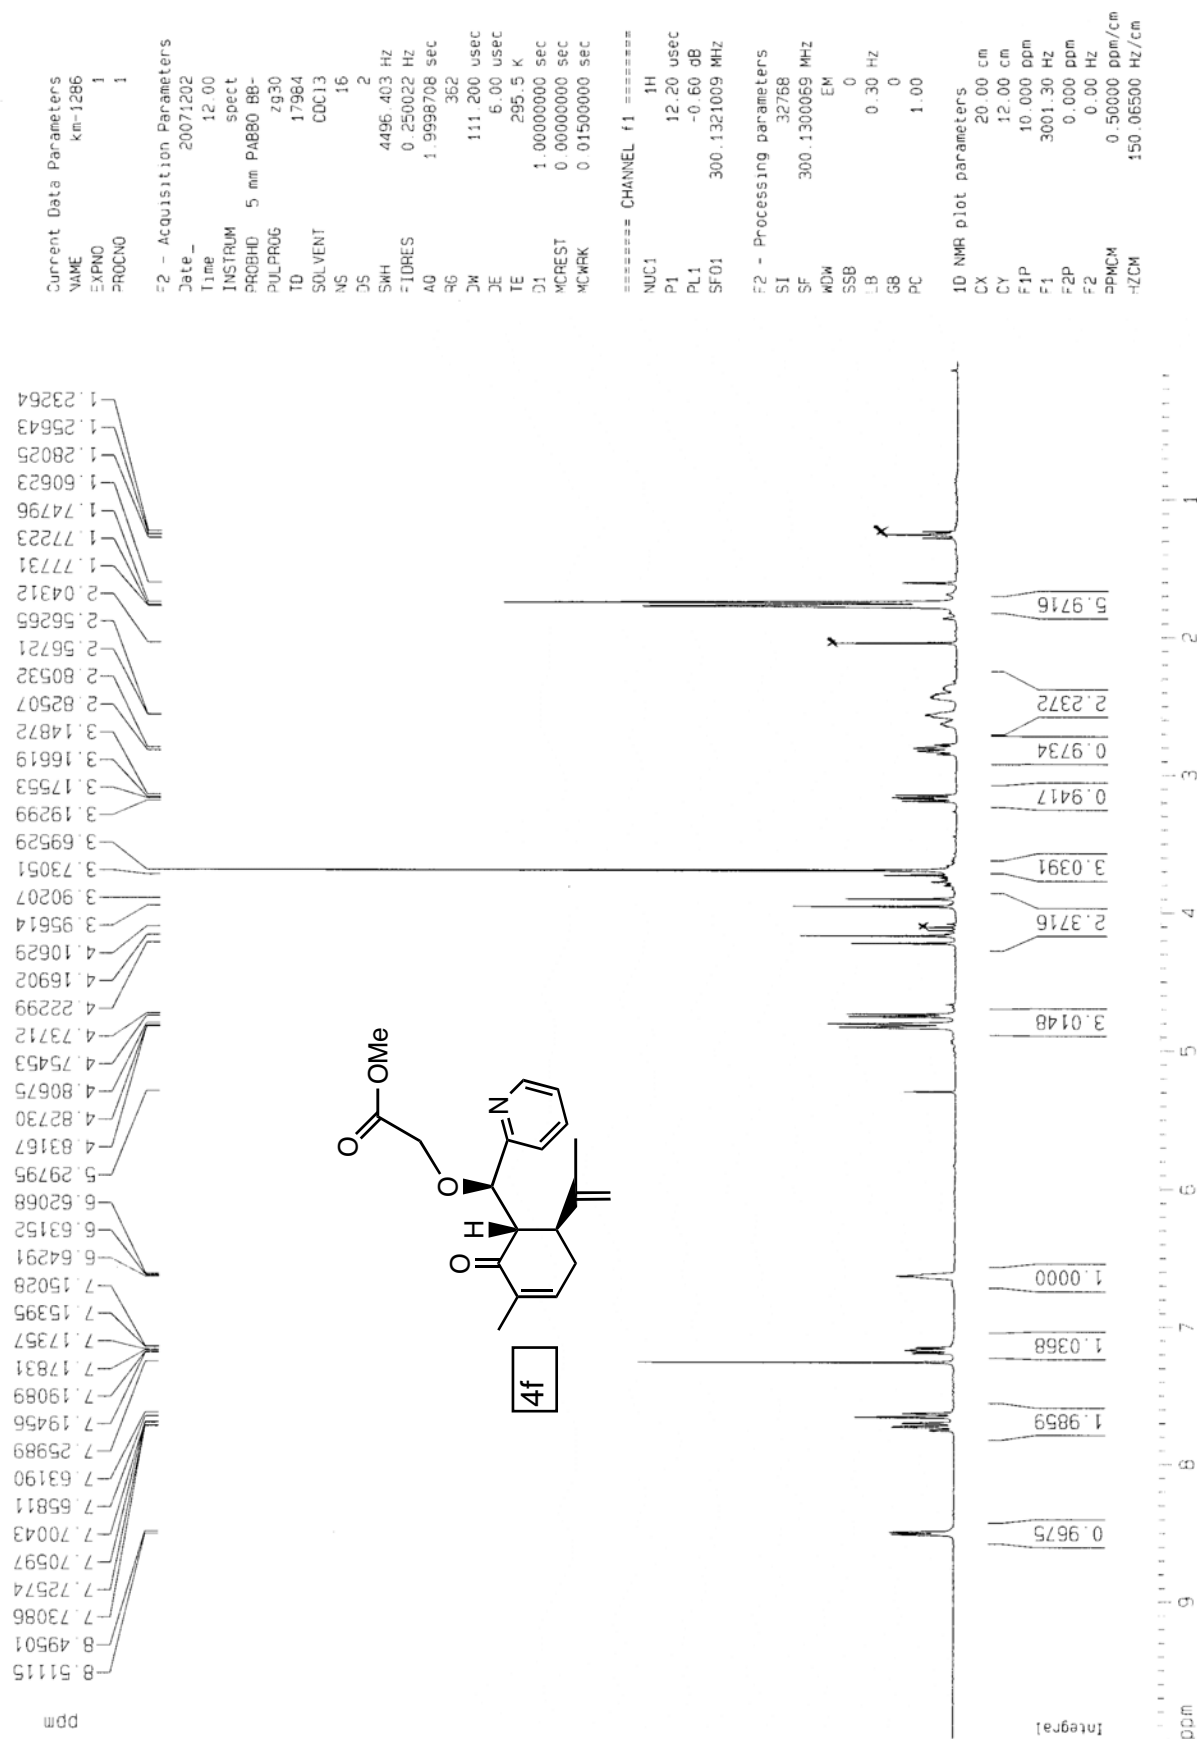

Current Data Parameters  
NAME Km-1286  
EXPNO 2  
PROCNO 1

F2 - Acquisition Parameters  
Date\_ 20071203  
Time\_ 11:18  
INSTRUM spect  
PROBHD 5 mm PABBO B8-  
PULPROG zgpg30  
TD 32372  
SOLVENT CDCl3  
NS 400  
DS 4  
SWH 18115.941 Hz  
FIDRES 0.559618 Hz  
AQ 0.8935172 sec  
RG 23170.5  
DM 27.600 usec  
DE 6.00 usec  
TE 297.0 K  
D1 2.0000000 sec  
d11 0.0300000 sec  
DELTA 1.8999998 sec  
WREST 0.0000000 sec  
WCMR 0.0150000 sec

===== CHANNEL f1 =====  
NUC1 13C  
P1 8.38 usec  
PL1 -2.80 dB  
SF01 75.4752953 MHz

===== CHANNEL f2 =====  
CPDPRG2 waltz16  
NUC2 1H  
PCPD2 80.00 usec  
PL2 -0.60 dB  
PL12 15.73 dB  
PL13 16.00 dB  
SF02 300.1312005 MHz

F2 - Processing parameters  
SI 32768  
SF 75.4677415 MHz  
WDW EM  
SSB 0  
LB 1.00 Hz  
GB 0  
PC 1.40

1D NMR plot parameters  
CX 20.00 cm  
CY 11.00 cm  
F1 220.118 ppm  
F1 16611.81 Hz  
F2 -0.000 ppm  
F2 -0.00 Hz  
PPMCM 11.00590 ppm/cm  
HZCM 830.59045 Hz/cm

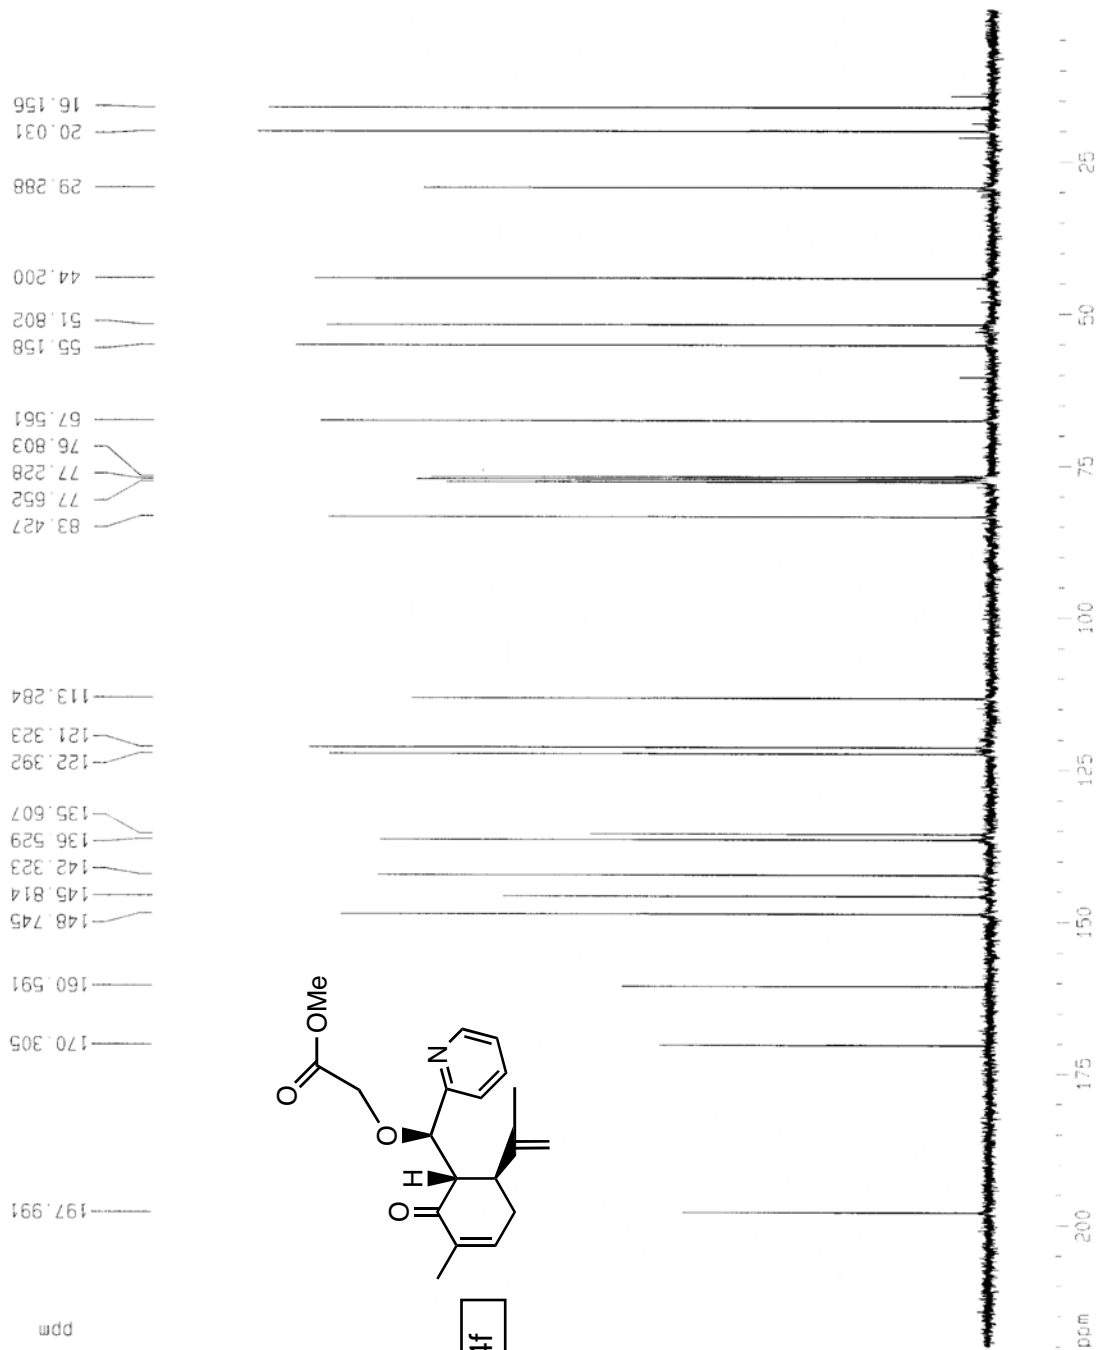

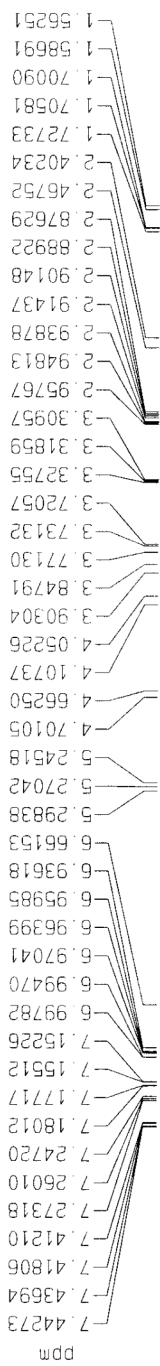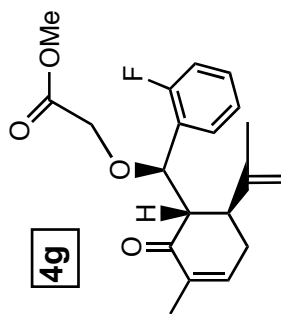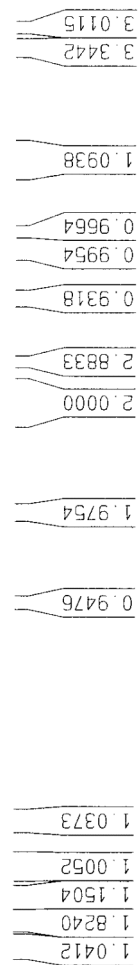

Current Data Parameters  
NAME km-1240  
EXPNO 1  
PROCNO 1

F2 - Acquisition Parameters

Date\_ 20071002  
Time 8.39  
INSTRUM spect  
PROBHD 5 mm PABBO BB-  
PULPROG zg30  
TD 17984  
SOLVENT CDCl3  
NS 16  
DS 2  
SWH 4496.403 Hz  
FIDRES 0.250022 Hz  
AQ 1.9998708 sec  
RG 322.5  
DW 111.200 usec  
DE 6.00 usec  
TE 296.2 K  
D1 1.00000000 sec  
MCREST 0.00000000 sec  
MCWRK 0.01500000 sec

===== CHANNEL f1 =====  
NUC1 1H  
P1 12.20 usec  
PL1 -0.60 dB  
SF01 300.1321009 MHz

F2 - Processing parameters

SI 32768  
SF 300.1300066 MHz  
WDW EM  
SSB 0  
LB 0.30 Hz  
GB 0  
PC 1.00

1D NMR plot parameters

CX 20.00 cm  
CY 11.00 cm  
F1P 9.000 ppm  
F2P 2701.17 Hz  
F2 0.000 ppm  
F2 0.00 Hz  
PPMCM 0.45000 ppm/cm  
HZCM 135.05850 Hz/cm

Current Data Parameters  
NAME km-1240  
EXPNO 2  
PROCNO 1

F2 - Acquisition Parameters  
Date\_ 20071003  
Time 13.24  
INSTRUM spect  
PROBHD 5 mm PABBO BB-  
PULPROG zgpg30  
TD 32772  
SOLVENT CDCl3  
NS 500  
DS 4  
SWH 17985.611 Hz  
FIDRES 0.555592 Hz  
AQ 0.8999916 sec  
RG 18390.4  
DM 27.800 usec  
DE 6.00 usec  
TE 296.8 K  
D1 2.00000000 sec  
d11 0.03000000 sec  
DELTA 1.89599998 sec  
NCREST 0.00000000 sec  
MCNMRK 0.01500000 sec

===== CHANNEL f1 =====  
NUC1 13C  
P1 8.38 usec  
PL1 -2.80 dB  
SF01 75.4752953 MHz

===== CHANNEL f2 =====  
CPDPRG2 waltz16  
NUC2 1H  
PCPD2 80.00 usec  
PL2 -0.60 dB  
PL12 15.73 dB  
PL13 16.00 dB  
SF02 300.1312005 MHz

F2 - Processing parameters  
SI 32768  
SF 75.4677363 MHz  
WDW EM  
SSB 0  
LB 1.00 Hz  
GB 0  
PC 1.40

1D NMR plot parameters  
CX 20.00 cm  
CY 10.00 cm  
F1P 219.323 ppm  
F1 16551.79 Hz  
F2P -0.000 ppm  
F2 -0.00 Hz  
PPMCM 10.96613 ppm/cm  
HZCM 827.58929 Hz/cm

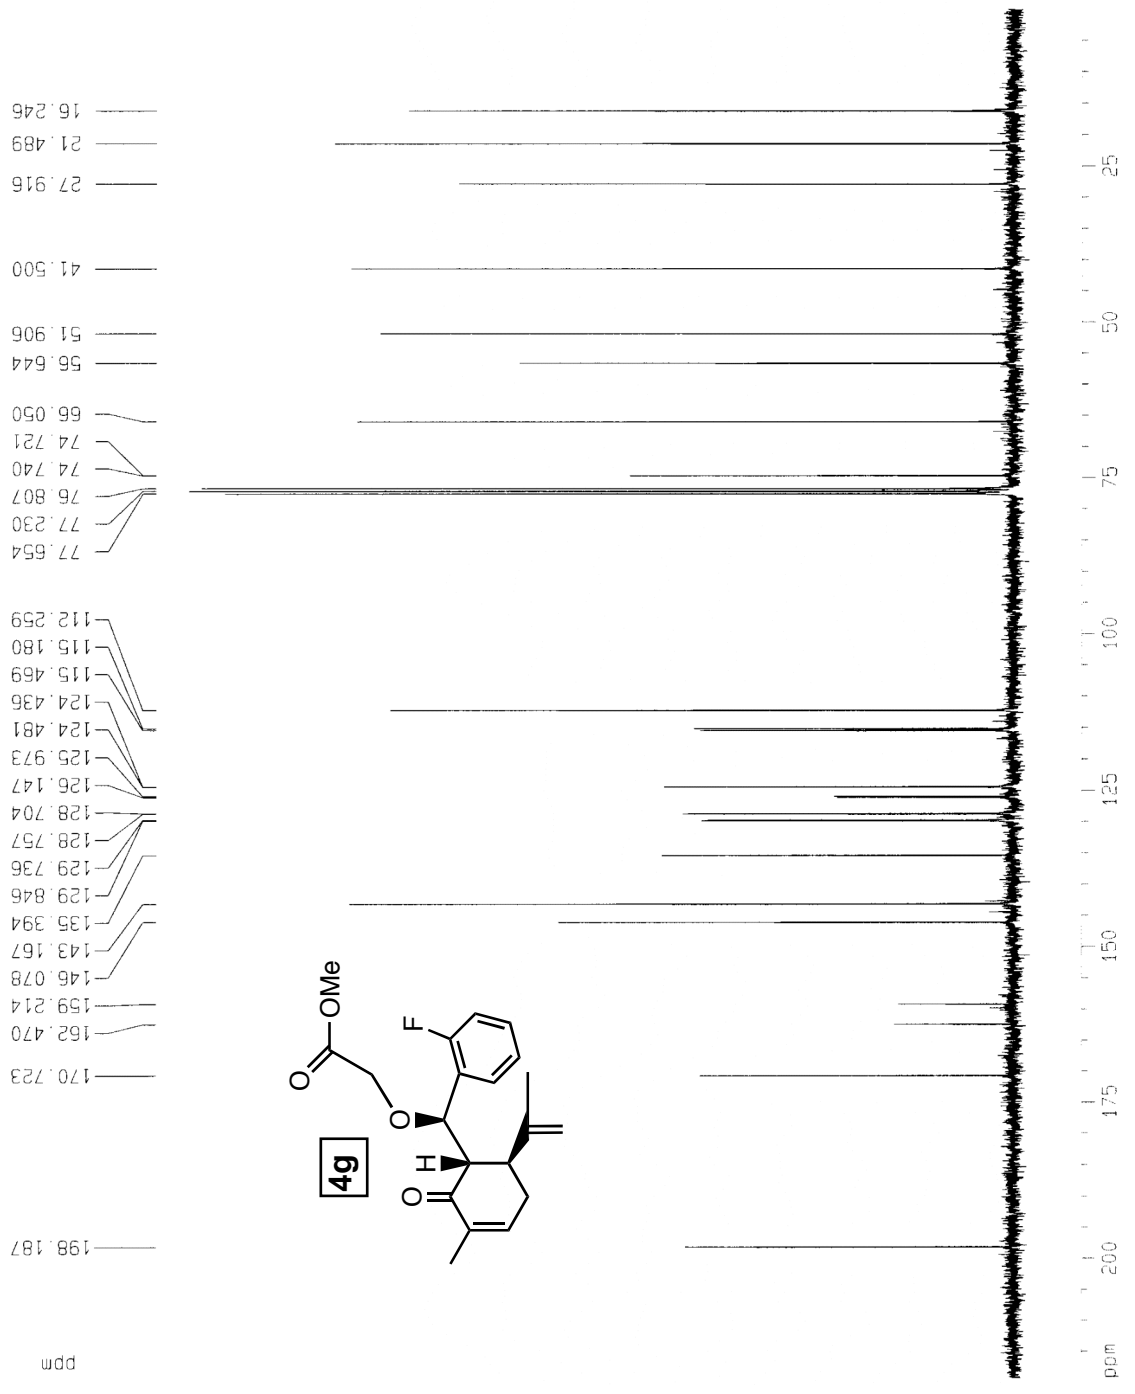

Current Data Parameters  
NAME km-1354  
EXPNO 1  
PROCNO 1

F2 - Acquisition Parameters  
Date\_ 20080205  
Time 17.30  
INSTRUM spect  
PROBHD 5 mm PAB80 BB-  
PULPROG zg30  
TD 23980  
SOLVENT CDCl3  
NS 16  
DS 2  
SWH 5995.204 Hz  
FIDRES 0.250008 Hz  
AQ 1.9999820 sec  
RG 128  
DW 83.400 usec  
DE 6.00 usec  
TE 296.3 K  
D1 1.00000000 sec  
MCREST 0.00000000 sec  
MCWRK 0.01500000 sec

===== CHANNEL f1 =====  
NUC1 1H  
P1 12.20 usec  
PL1 -1.00 dB  
SF01 300.1318608 MHz

F2 - Processing parameters  
SI 32768  
SF 300.1300068 MHz  
WDW EM  
SSB 0  
LB 0.30 Hz  
GB 0  
PC 1.00  
1D NMR plot parameters  
CX 20.00 cm  
CY 10.00 cm  
F1P 9.000 ppm  
F1 2701.17 Hz  
F2P 0.000 ppm  
F2 0.00 Hz  
PPMCM 0.45000 ppm/cm  
HZCM 135.05850 Hz/cm

7.40068  
7.39826  
7.39485  
7.39244  
7.25975  
6.63624  
6.63409  
6.30702  
6.30091  
6.29624  
6.29020  
6.2549  
6.24490  
4.89116  
4.86597  
4.75068  
4.74699  
4.74299  
4.65722  
4.15053  
4.09461  
3.94453  
3.88860  
3.70730  
3.21684  
3.20044  
3.10983  
3.09506  
3.08466  
3.06993

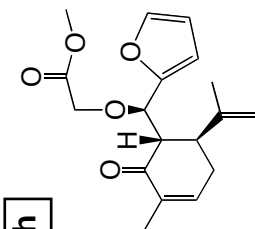

0.8968  
1.0000  
1.8702  
2.0491  
2.0633  
2.9306  
1.0072  
0.9823  
1.0375  
1.0745  
6.2673

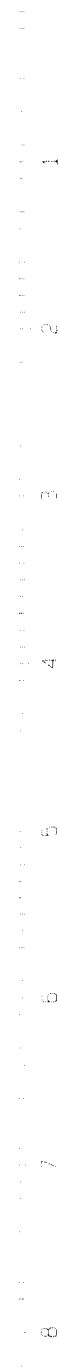

Current Data Parameters  
NAME km-1354  
EXPNO 2  
PROCNO 1

# F2 - Acquisition Parameters

Date\_ 20080210  
Time 9 05  
INSTRUM spect  
PROBHD 5 mm PABBO BB-  
PULPROG zgpg30  
TD 36230  
SOLVENT CDCl3  
NS 2000  
DS 4  
SWH 18115.941 Hz  
FIDRES 0.500026 Hz  
AQ 0.9999980 sec  
RG 23170.5  
CW 27.600 usec  
DE 6.00 usec  
TE 297.0 K  
J1 2.00000000 sec  
J11 0.03000000 sec  
DELTA 1.89999996 sec  
MCREST 0.00000000 sec  
MCRK 0.01500000 sec

===== CHANNEL f1 =====  
NUC1 13C  
P1 8.38 usec  
PL1 -2.80 dB  
SF01 75.4752953 MHz

===== CHANNEL f2 =====  
CPDPRG2 waltz16  
NUC2 1H  
PCPD2 80.00 usec  
PL2 -1.00 dB  
PL12 15.33 dB  
PL13 15.00 dB  
SF02 300.1312005 MHz

F2 - Processing parameters  
SI 32768  
SF 75.4677348 MHz  
WDW EM  
SSB 0  
LB 1.00 Hz  
GB 0  
PC 1.40

1D NMR plot parameters  
CX 20.00 cm  
CY 10.00 cm  
F1 220.206 ppm  
F1 15618.44 Hz  
F2 0.000 ppm  
F2 0.00 Hz  
PPMCM 11.01030 ppm/cm  
HZCM 830.92206 Hz/cm

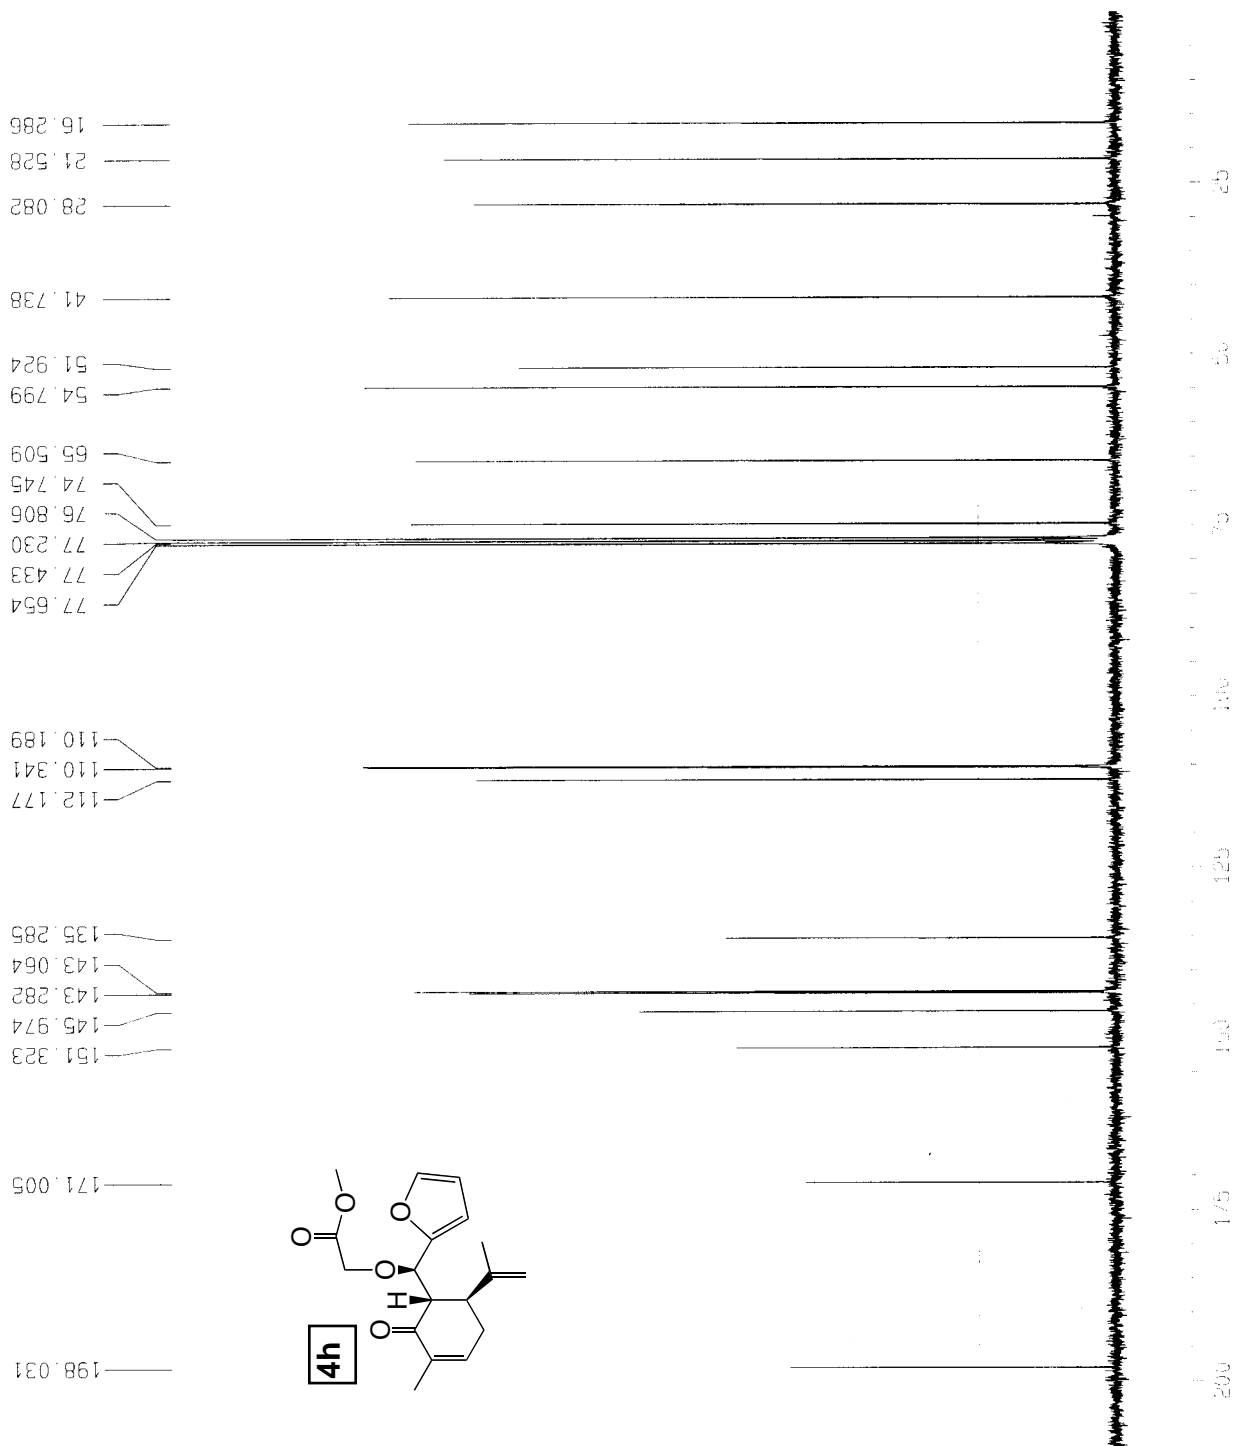

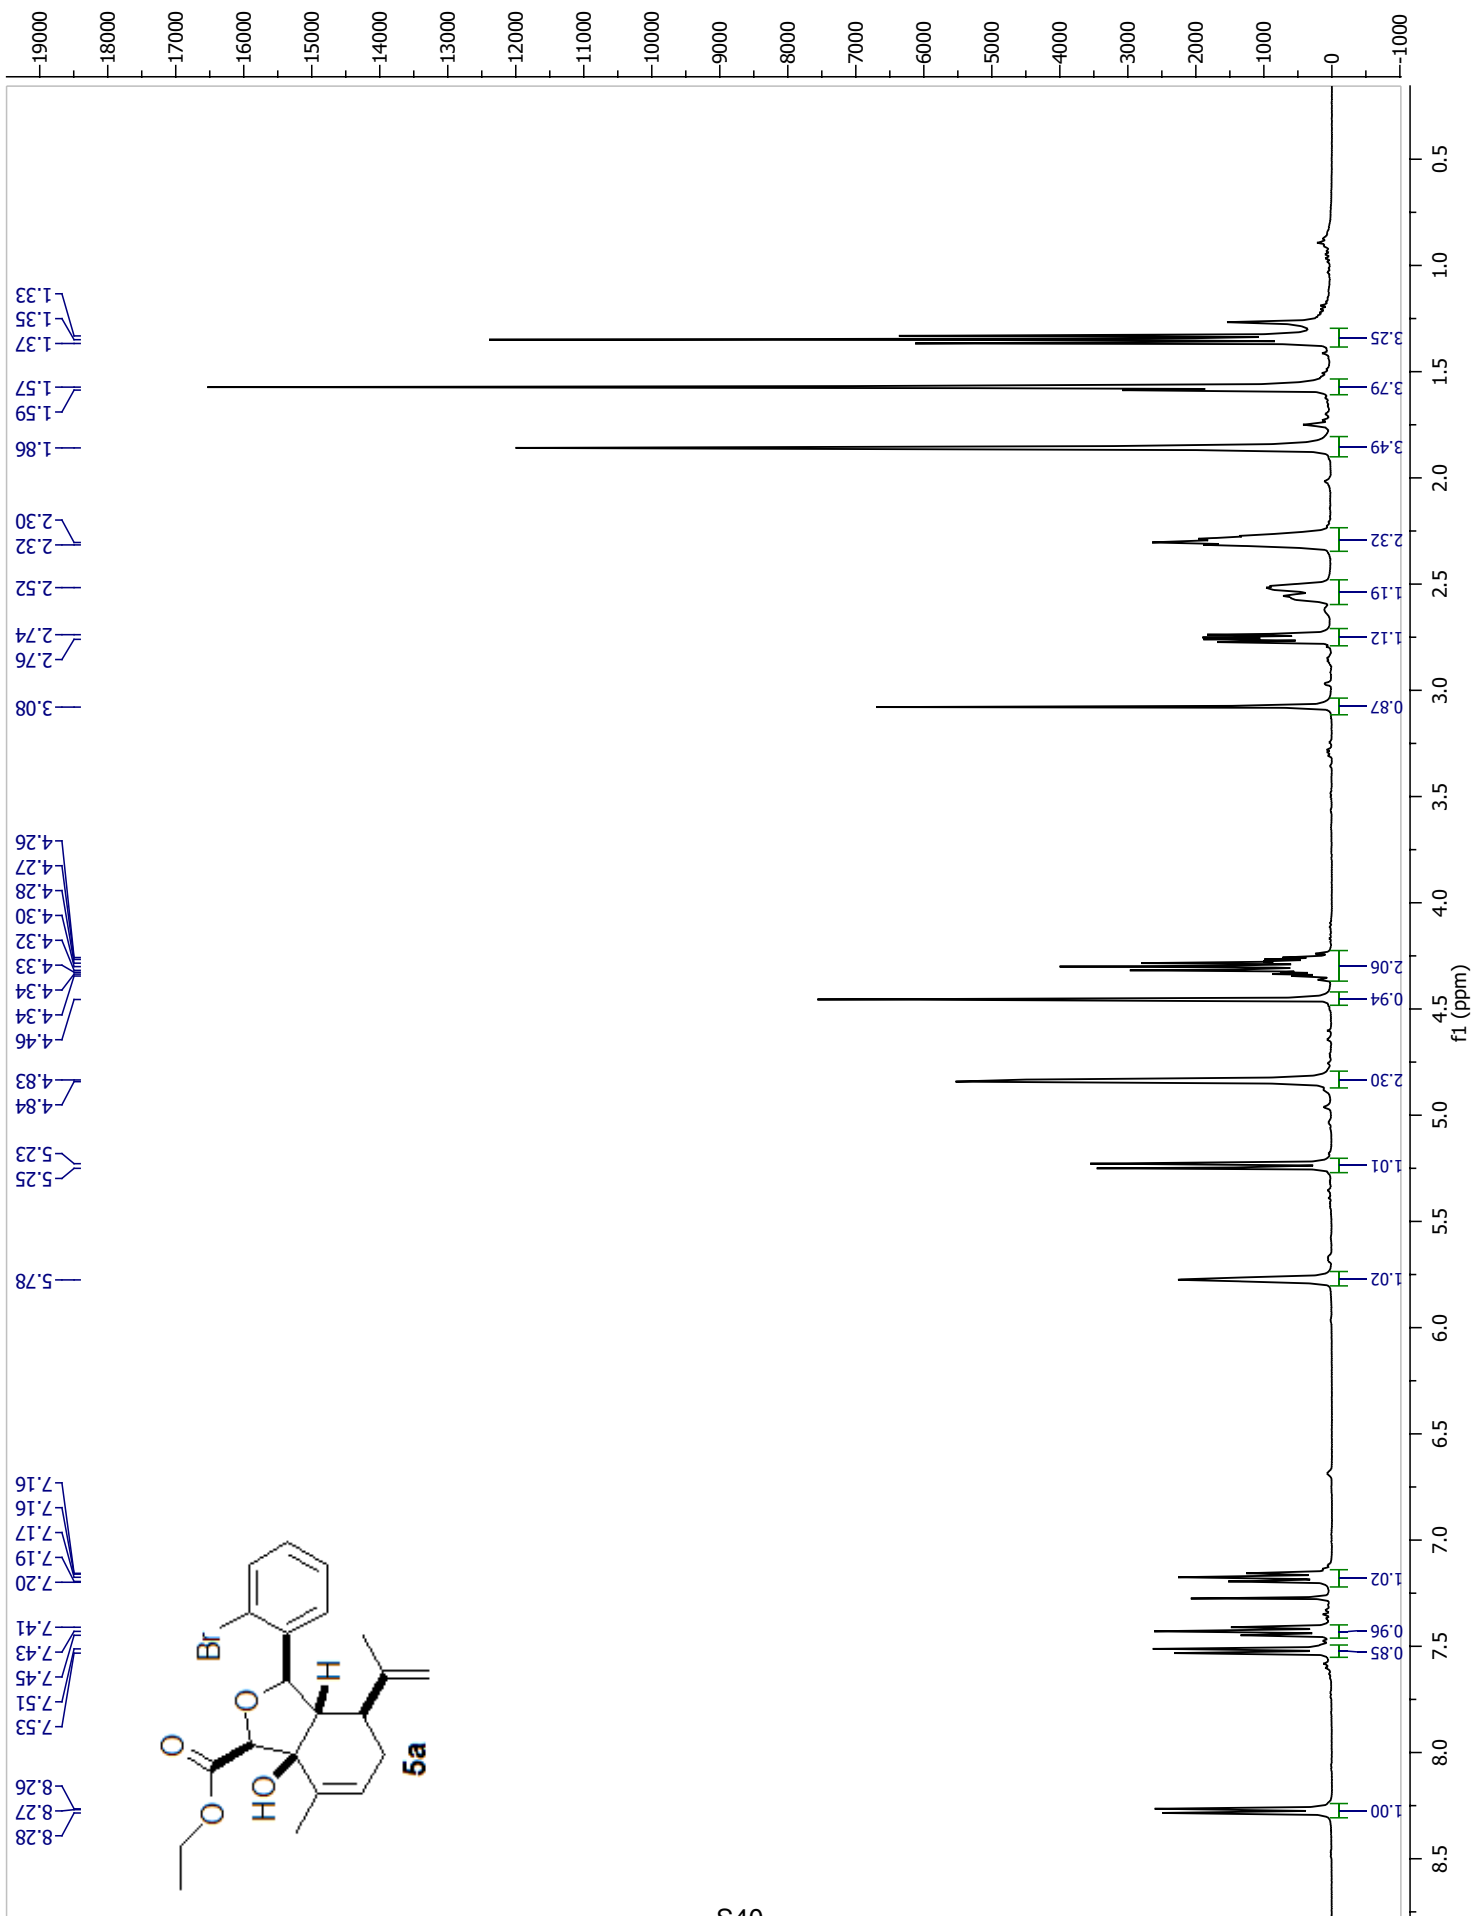

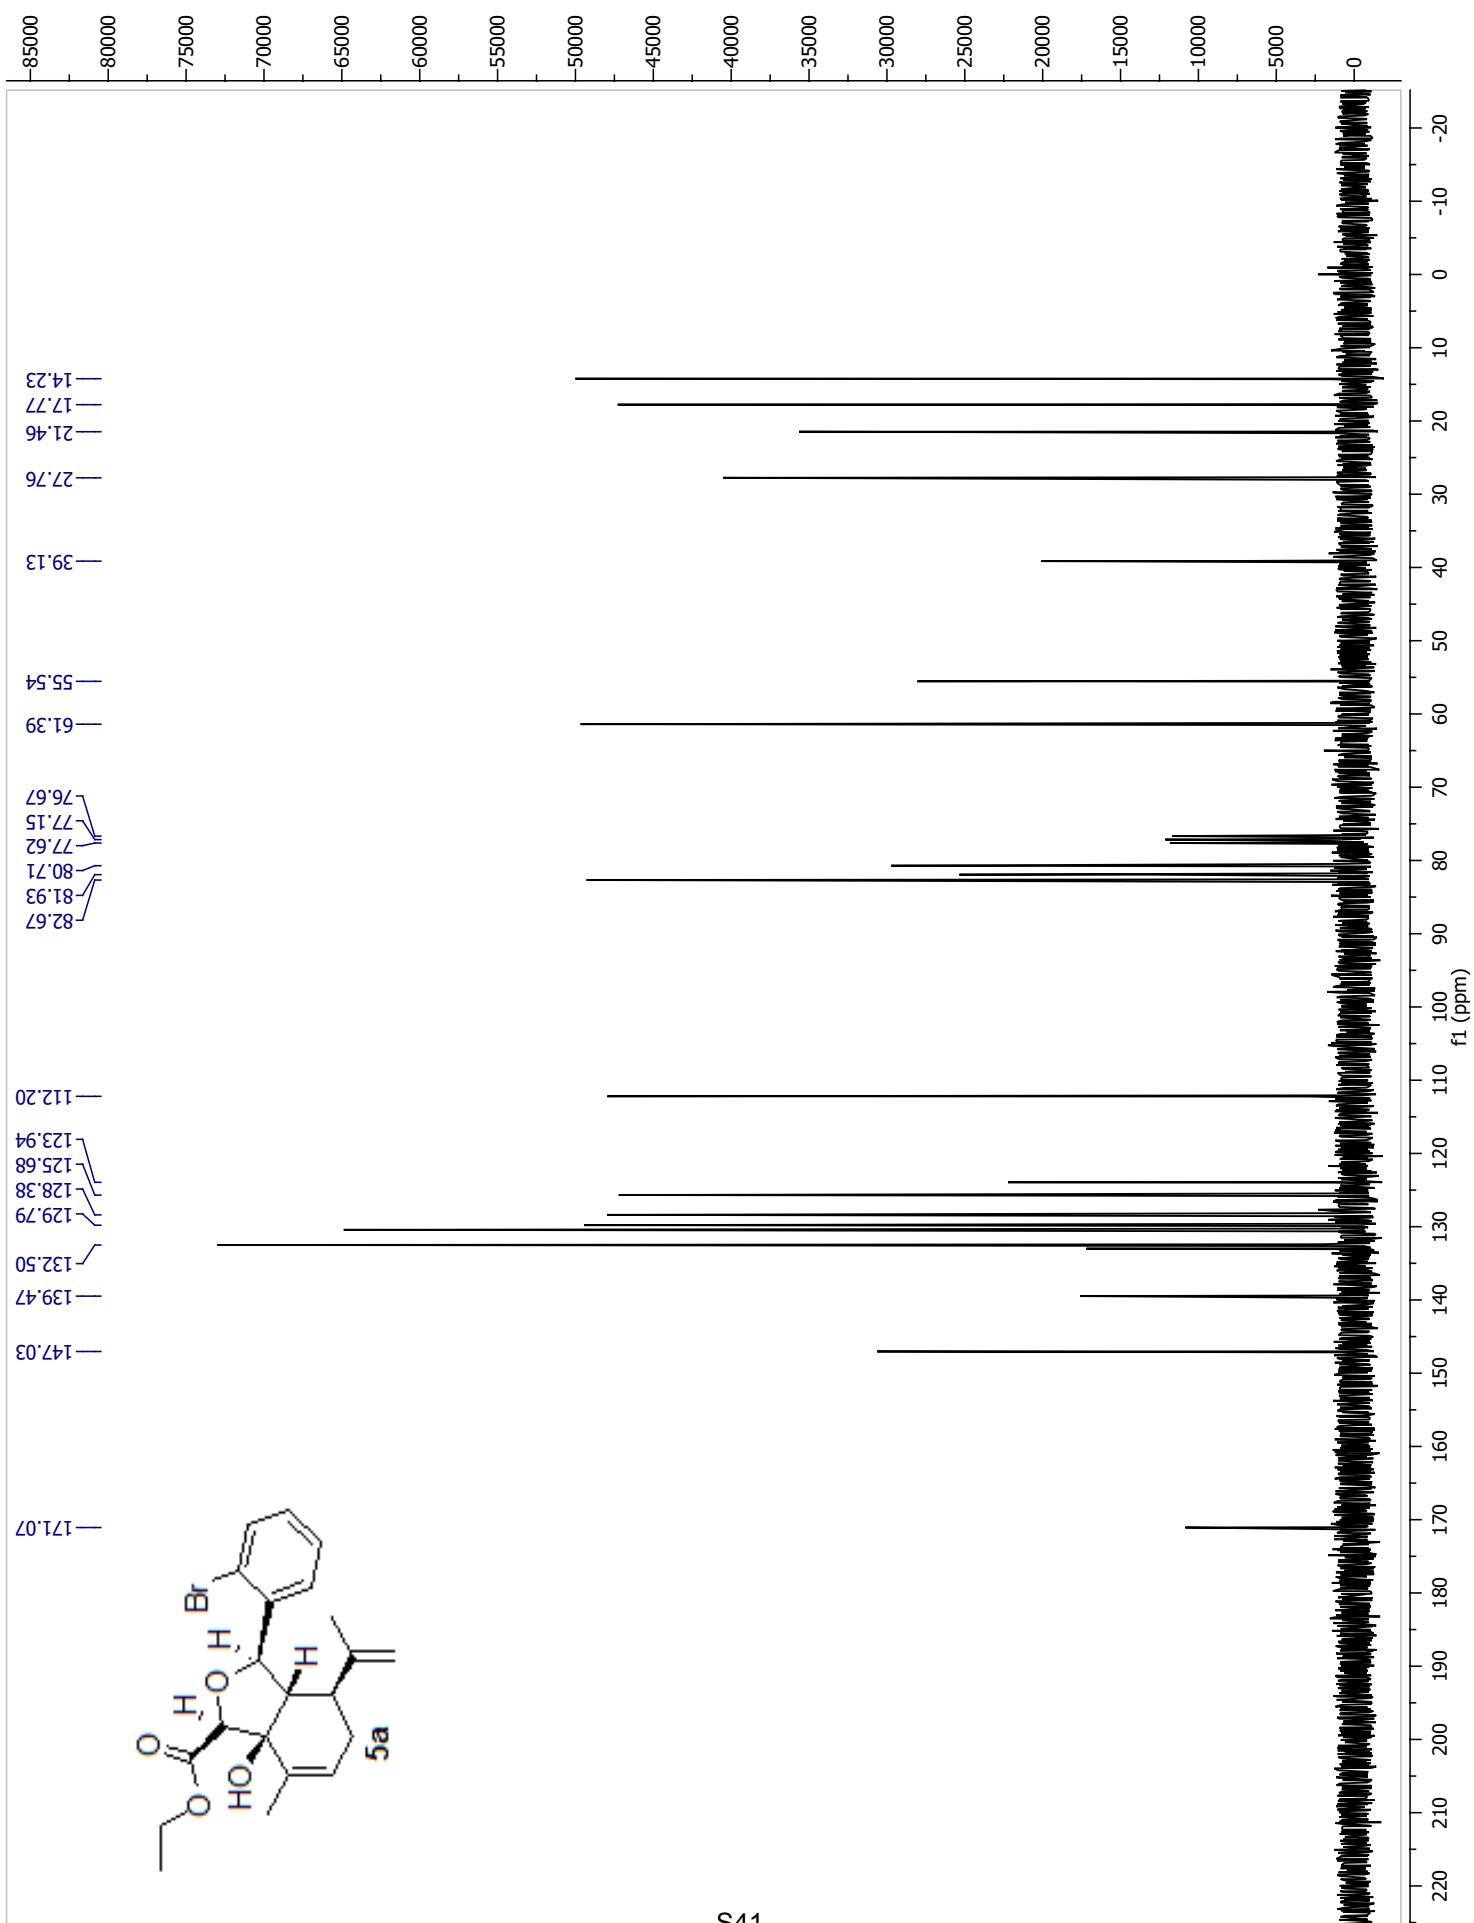

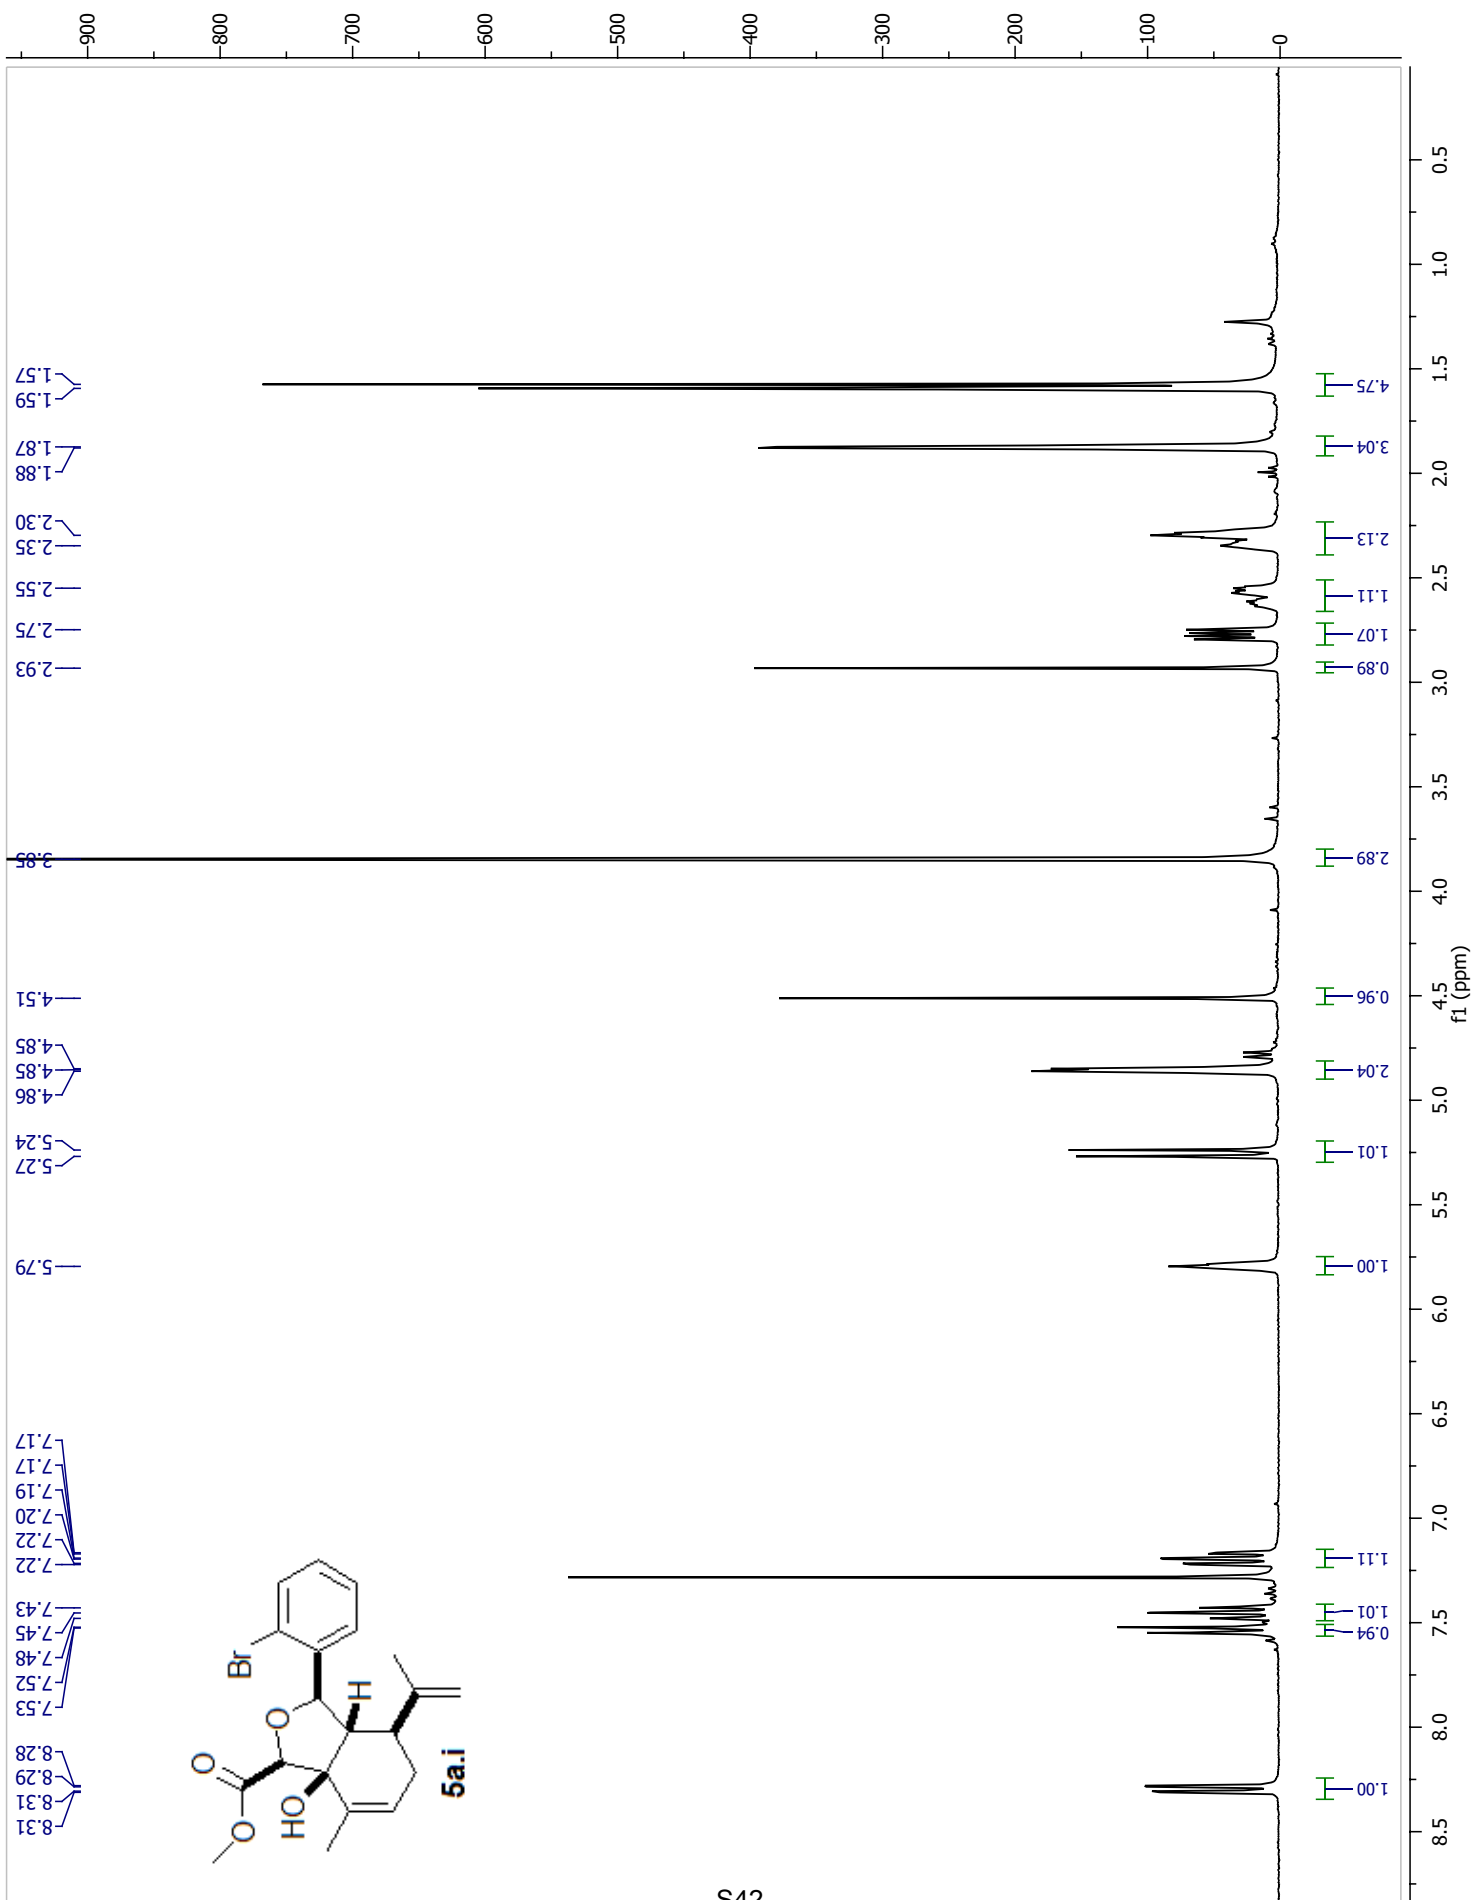

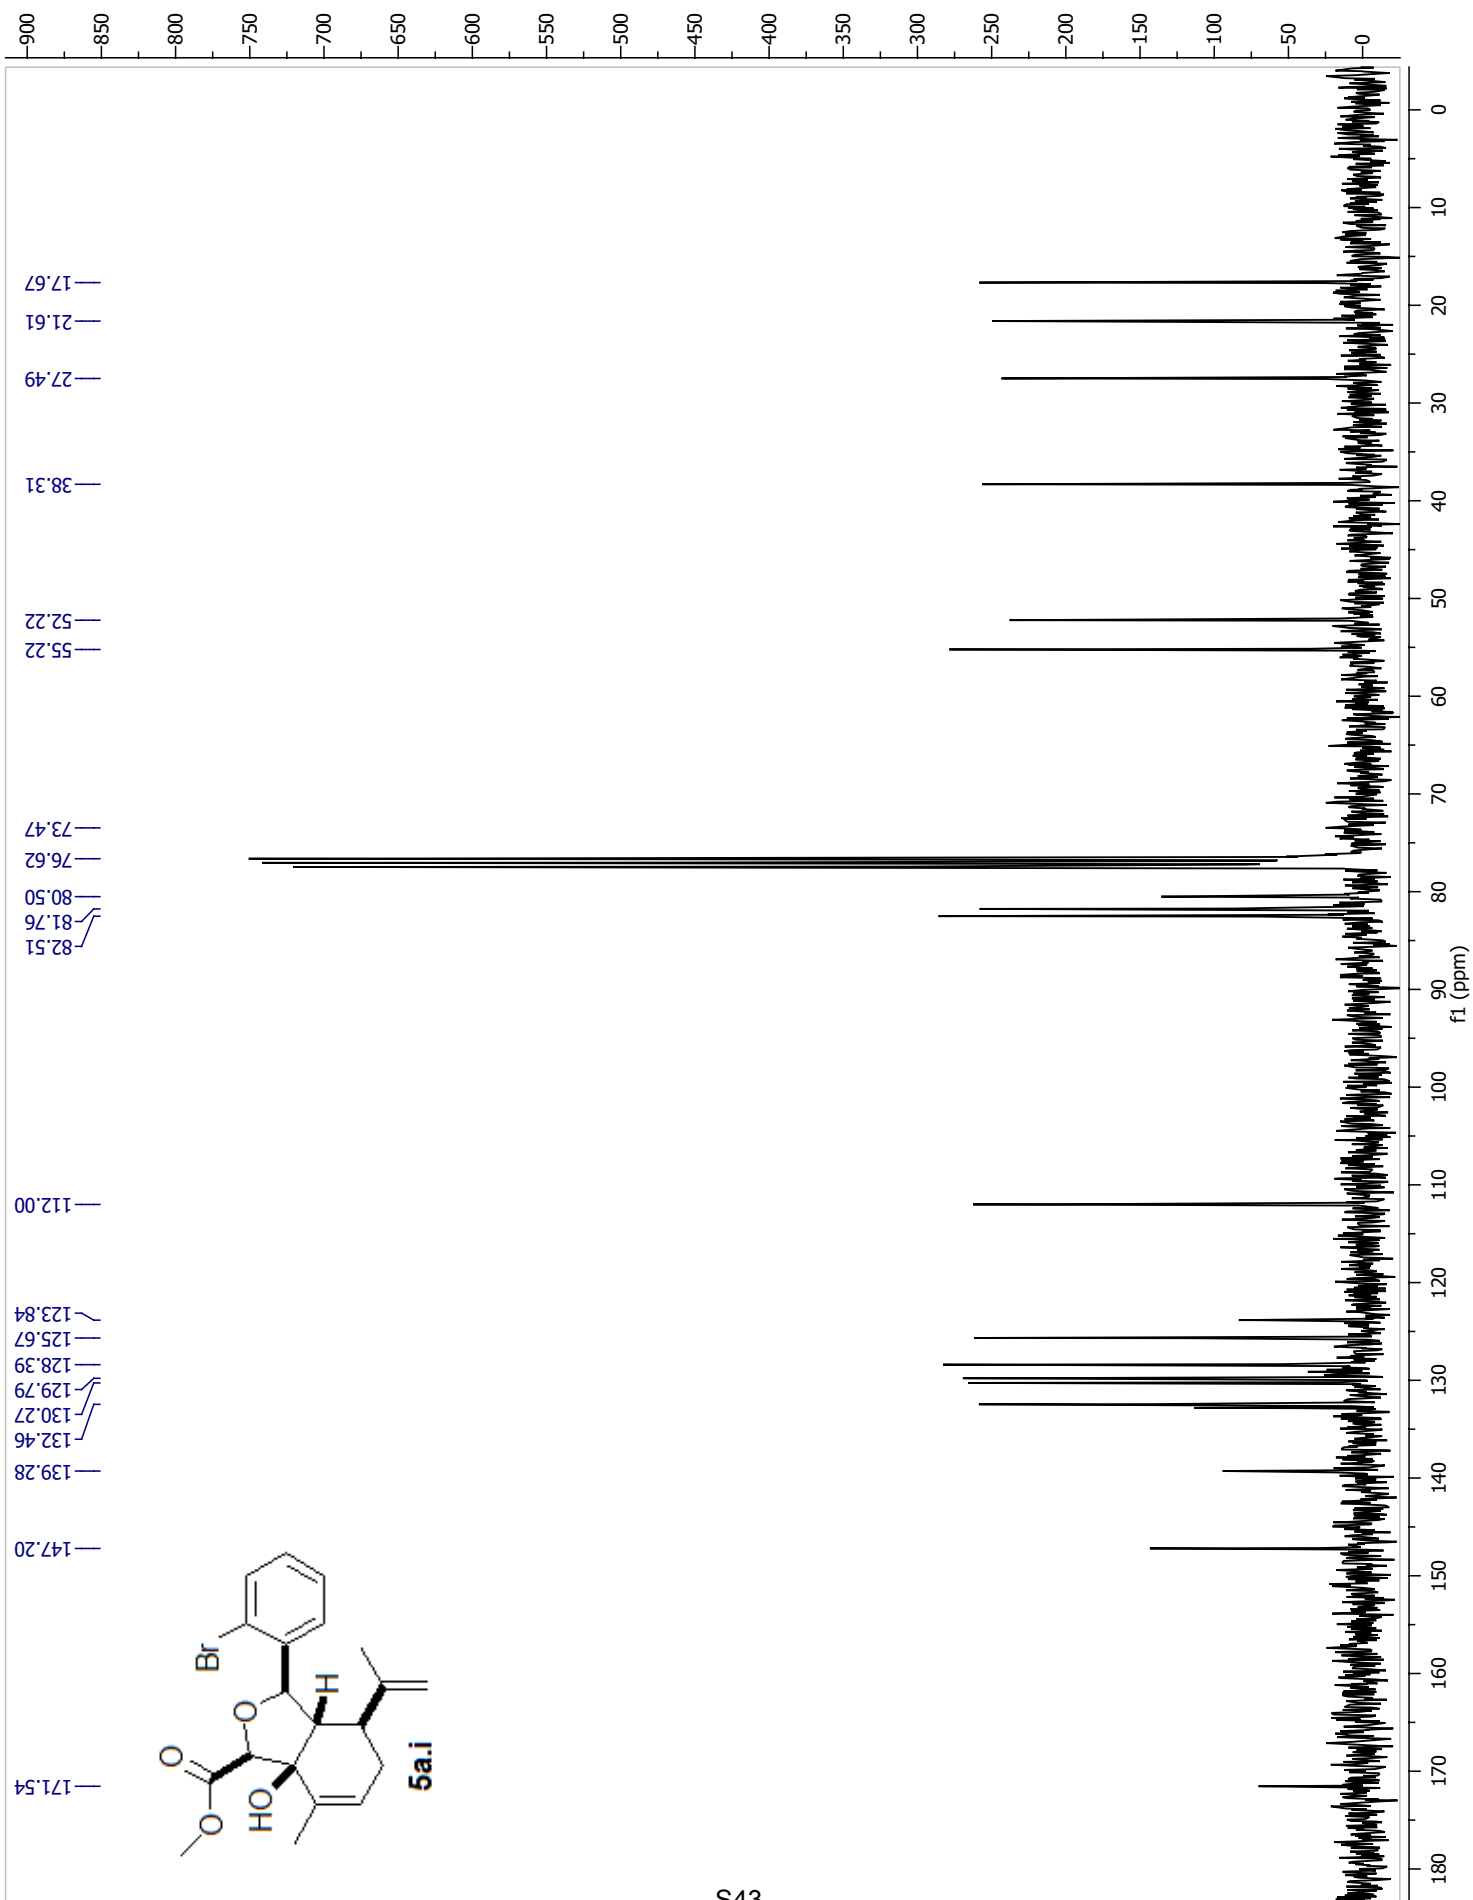

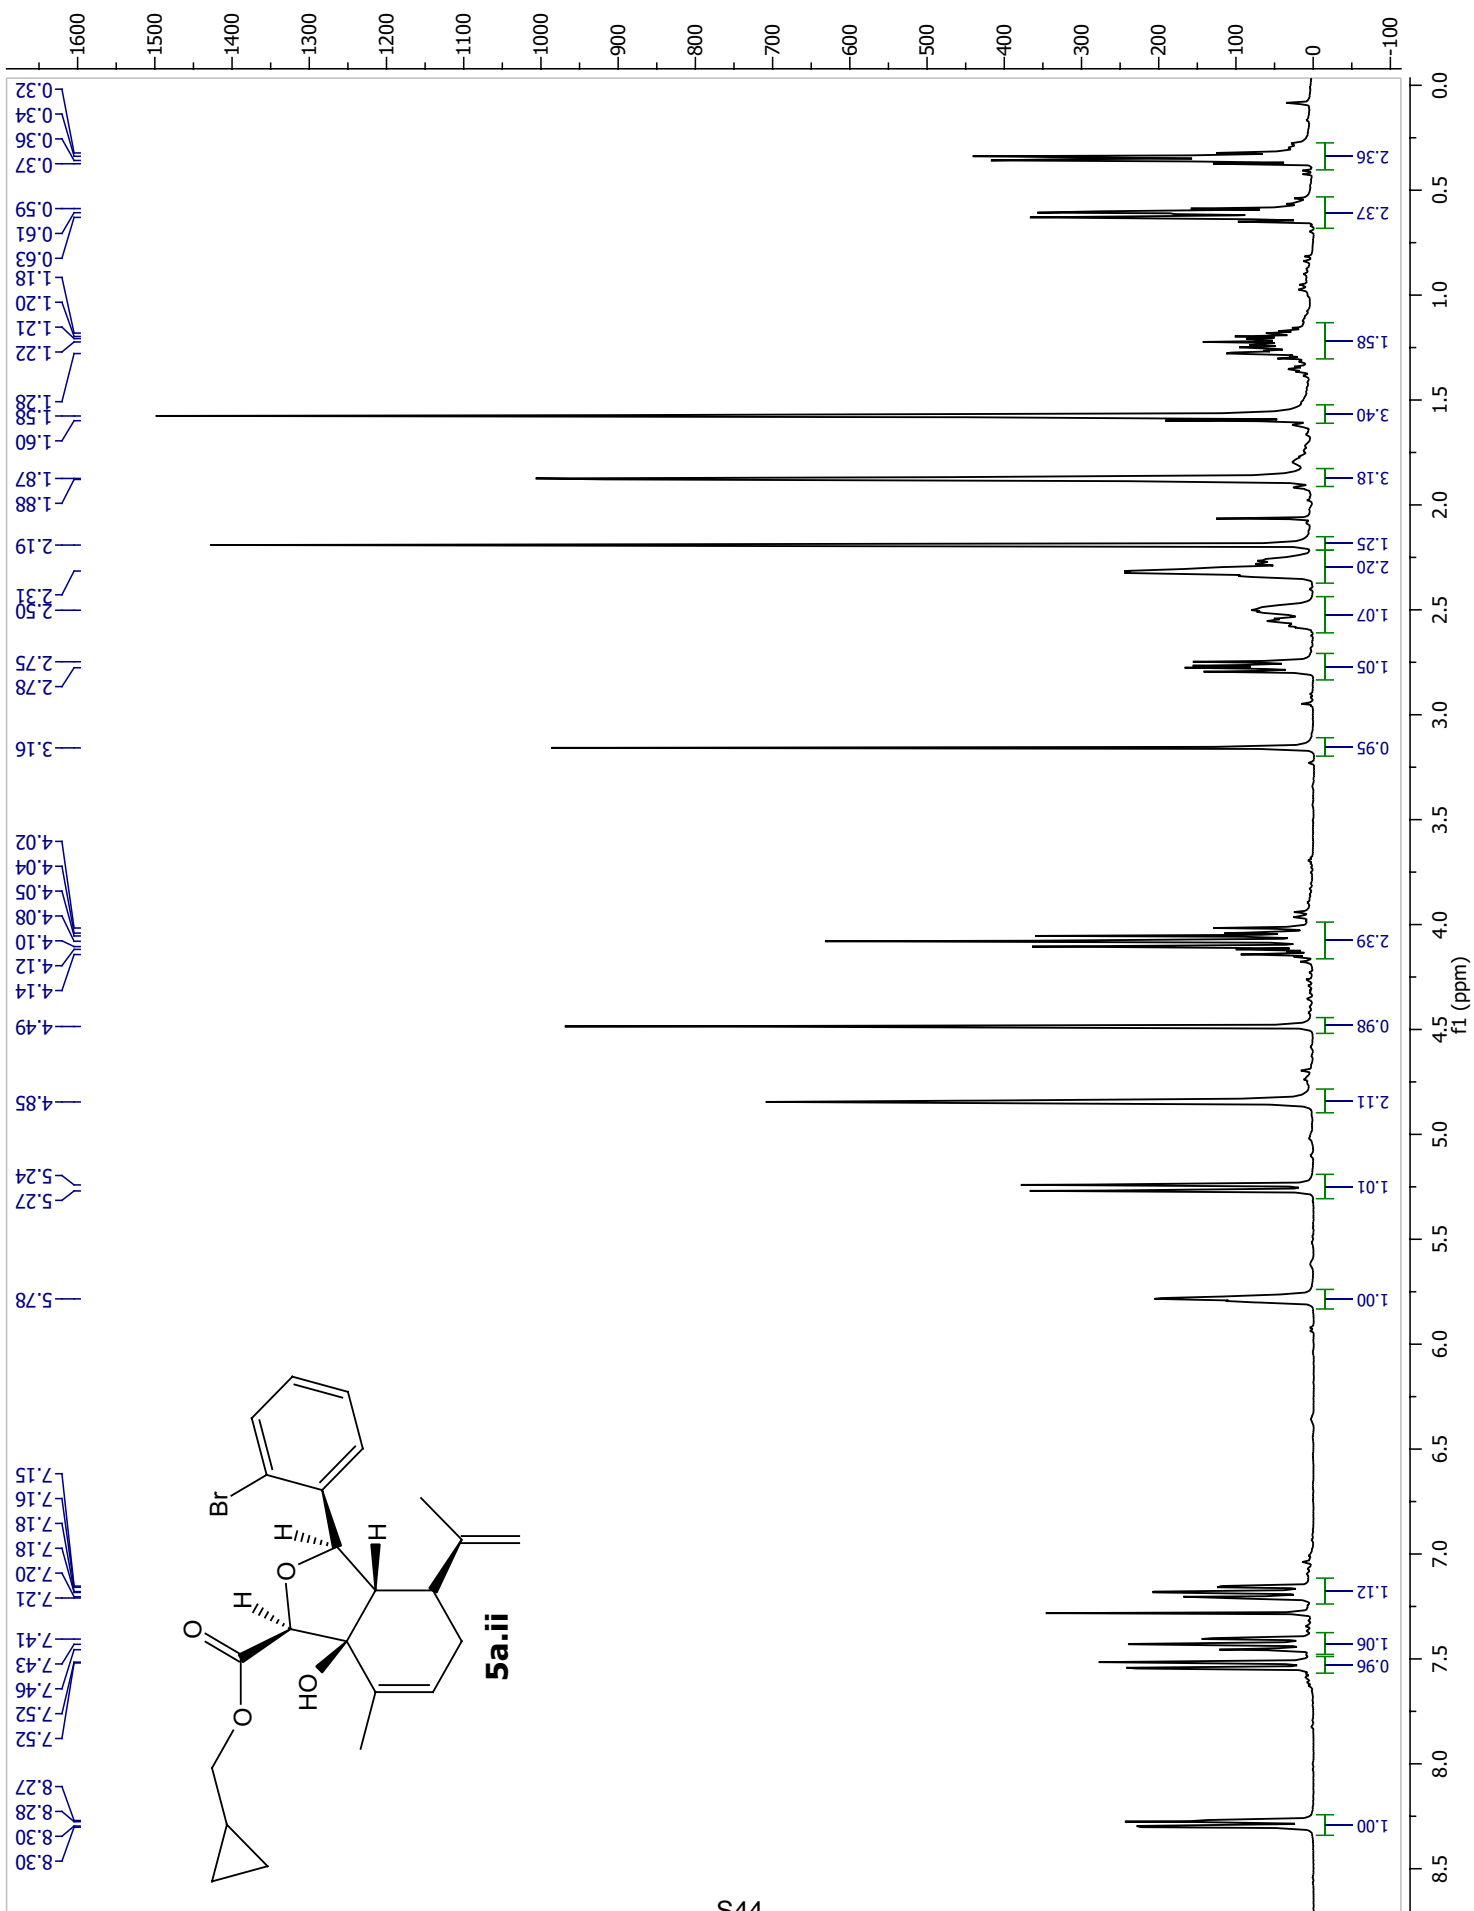

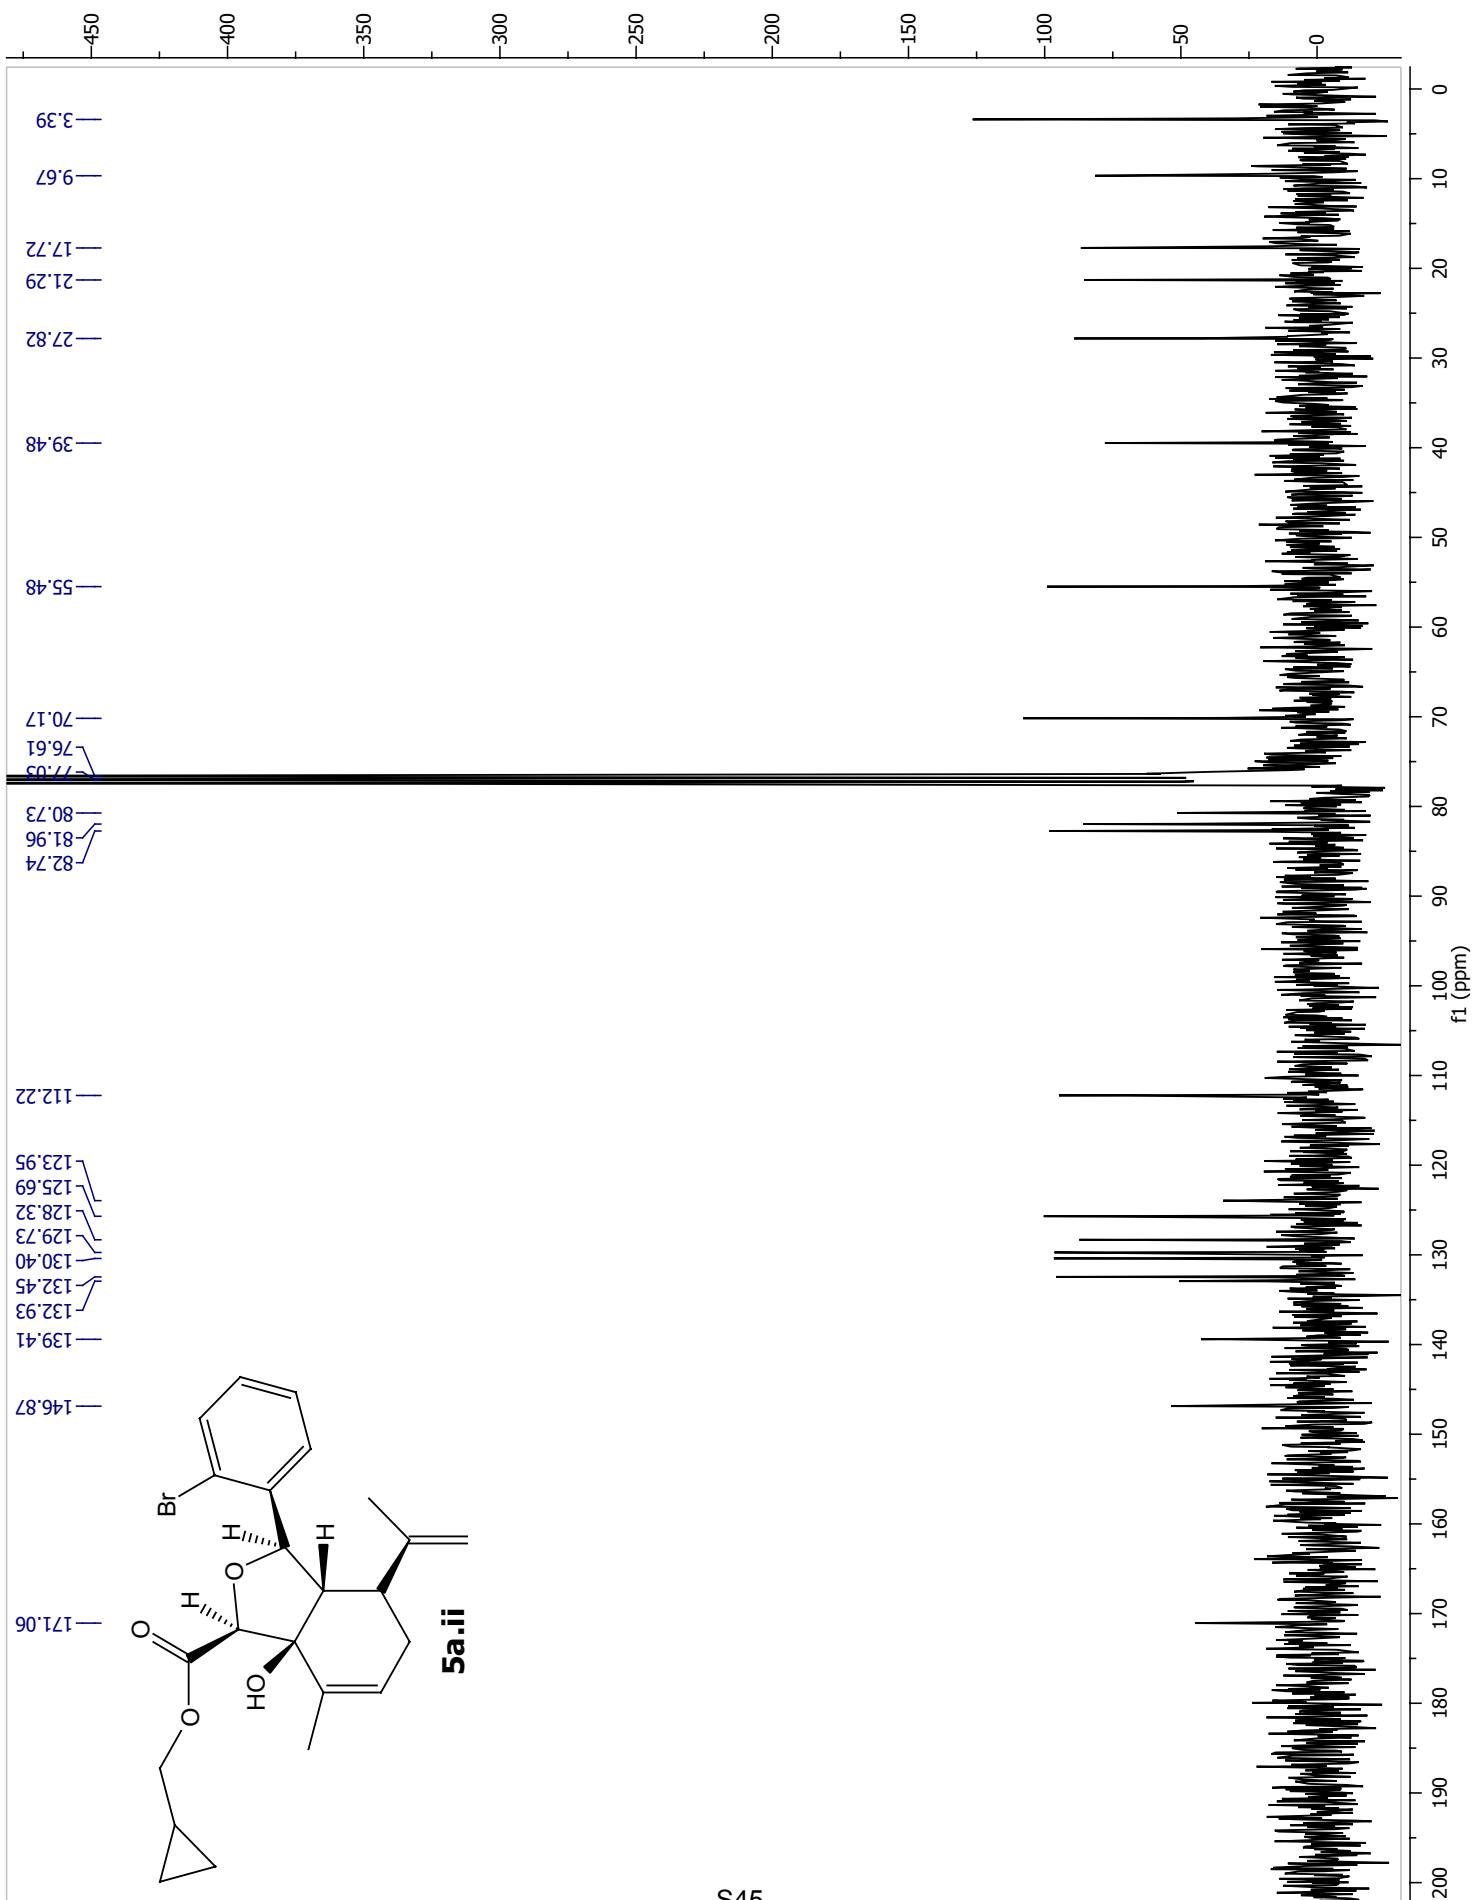

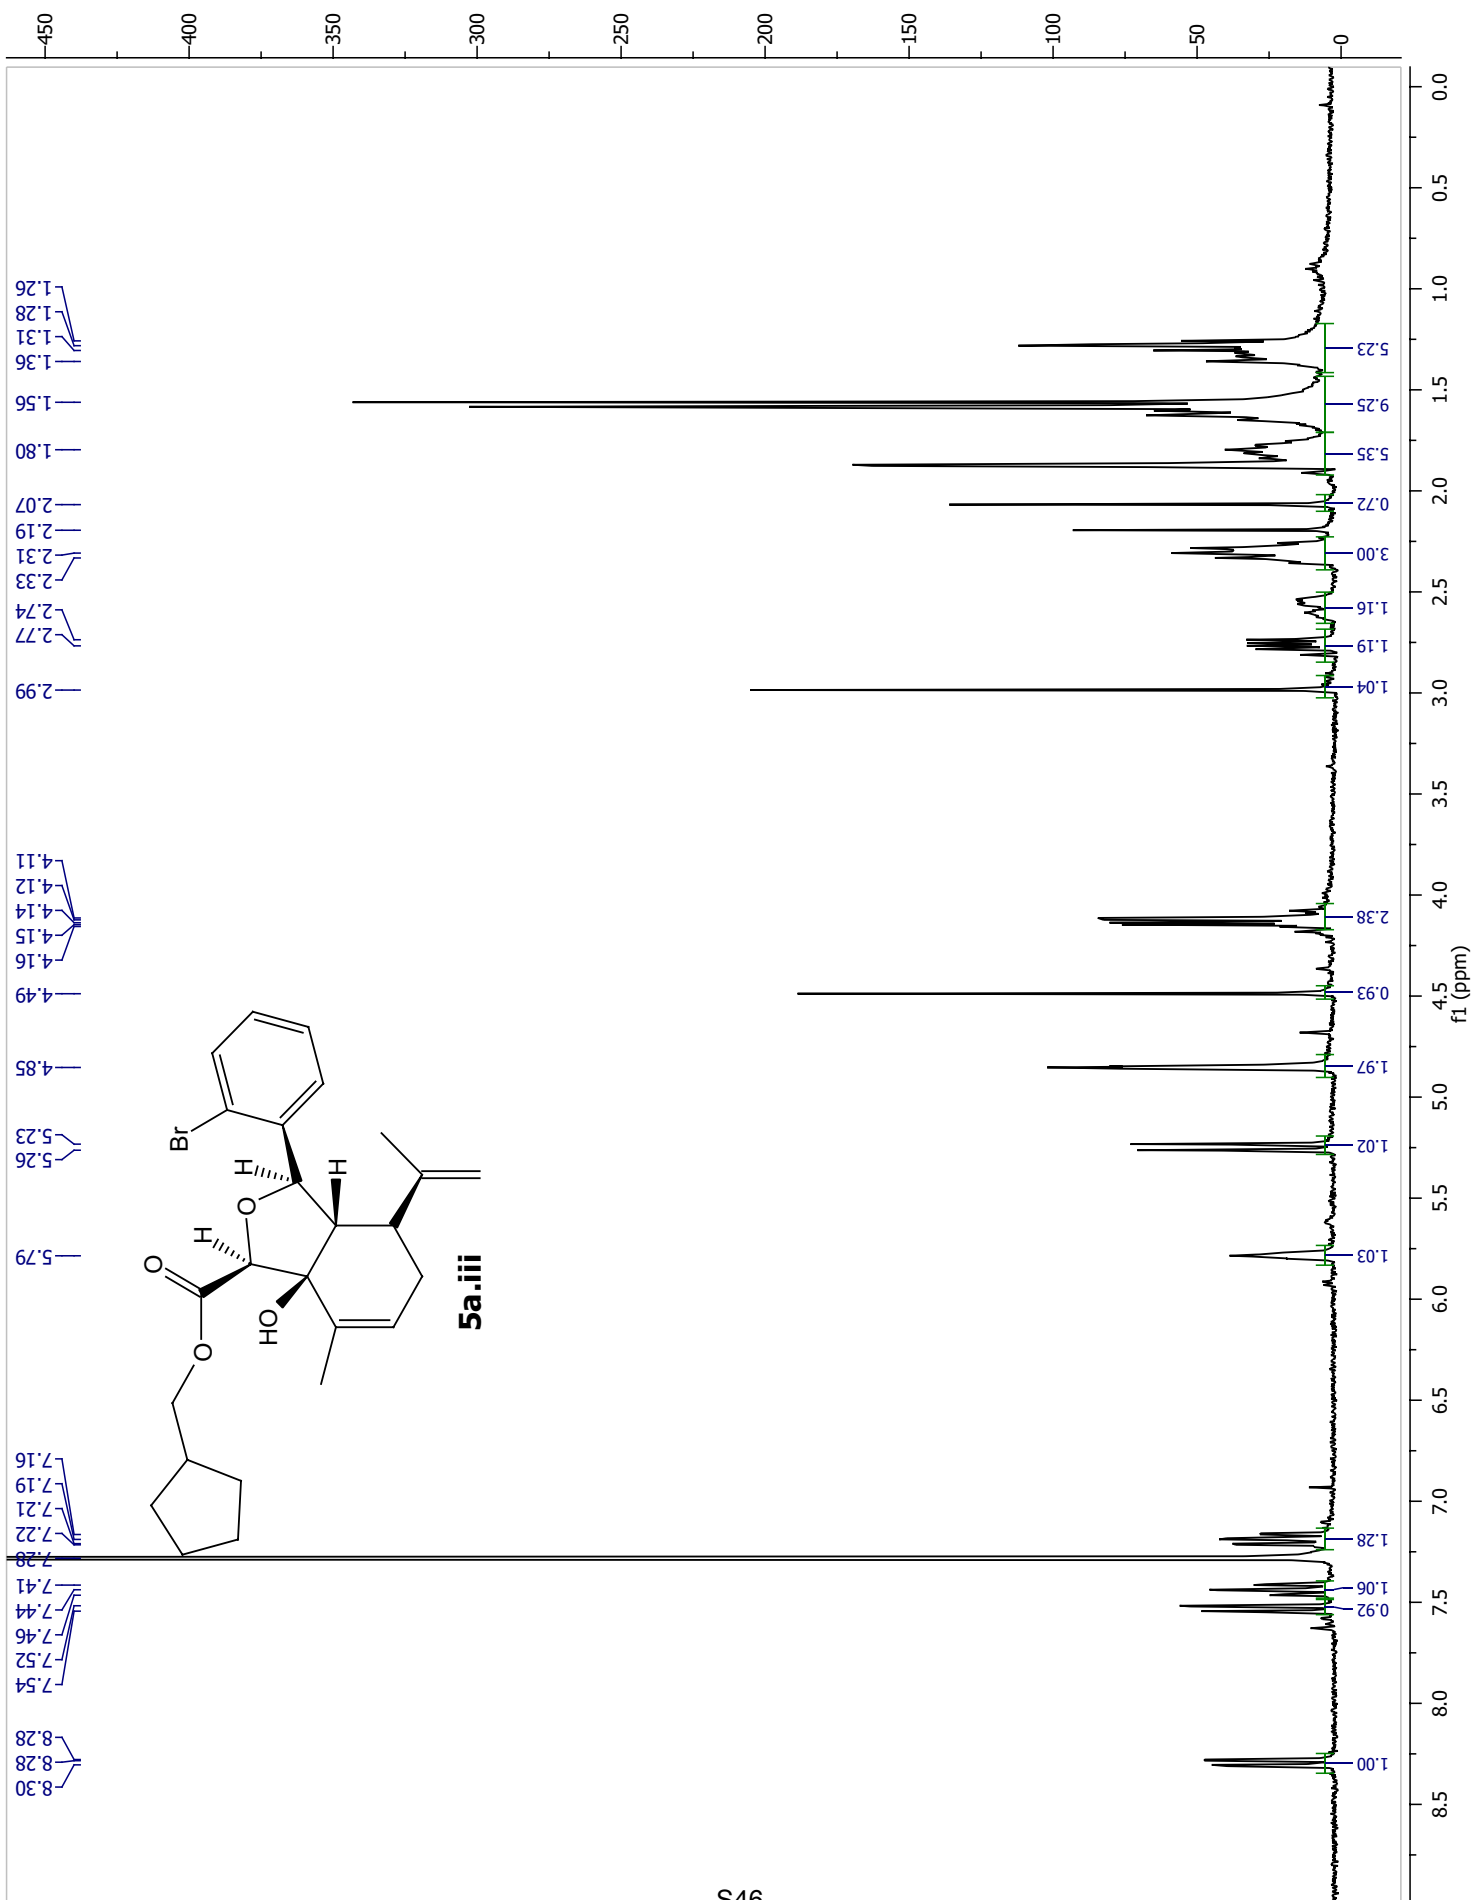

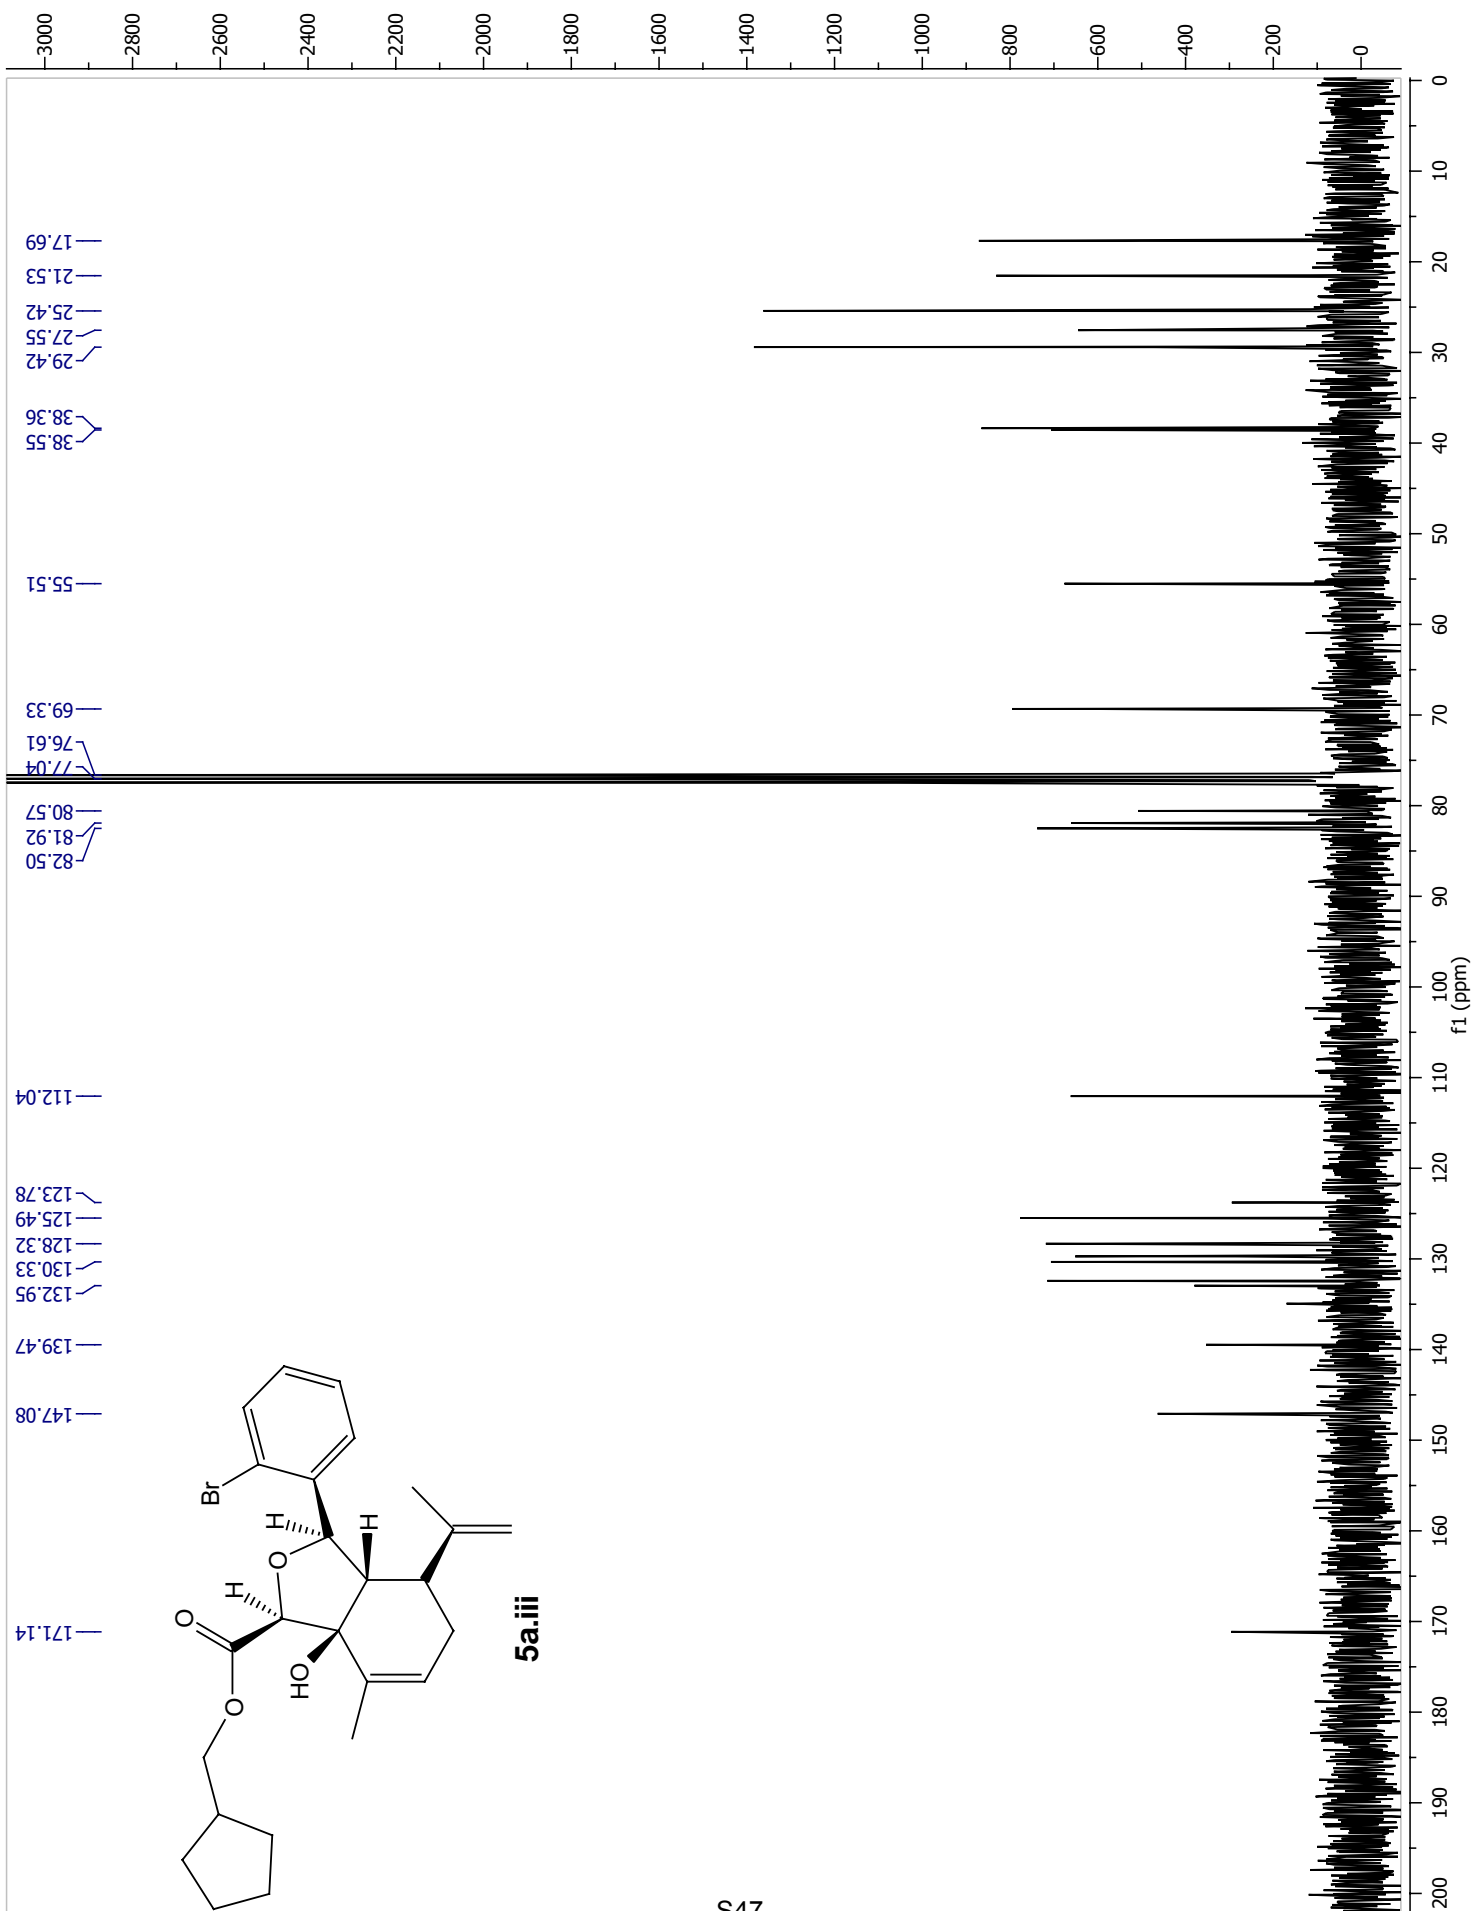

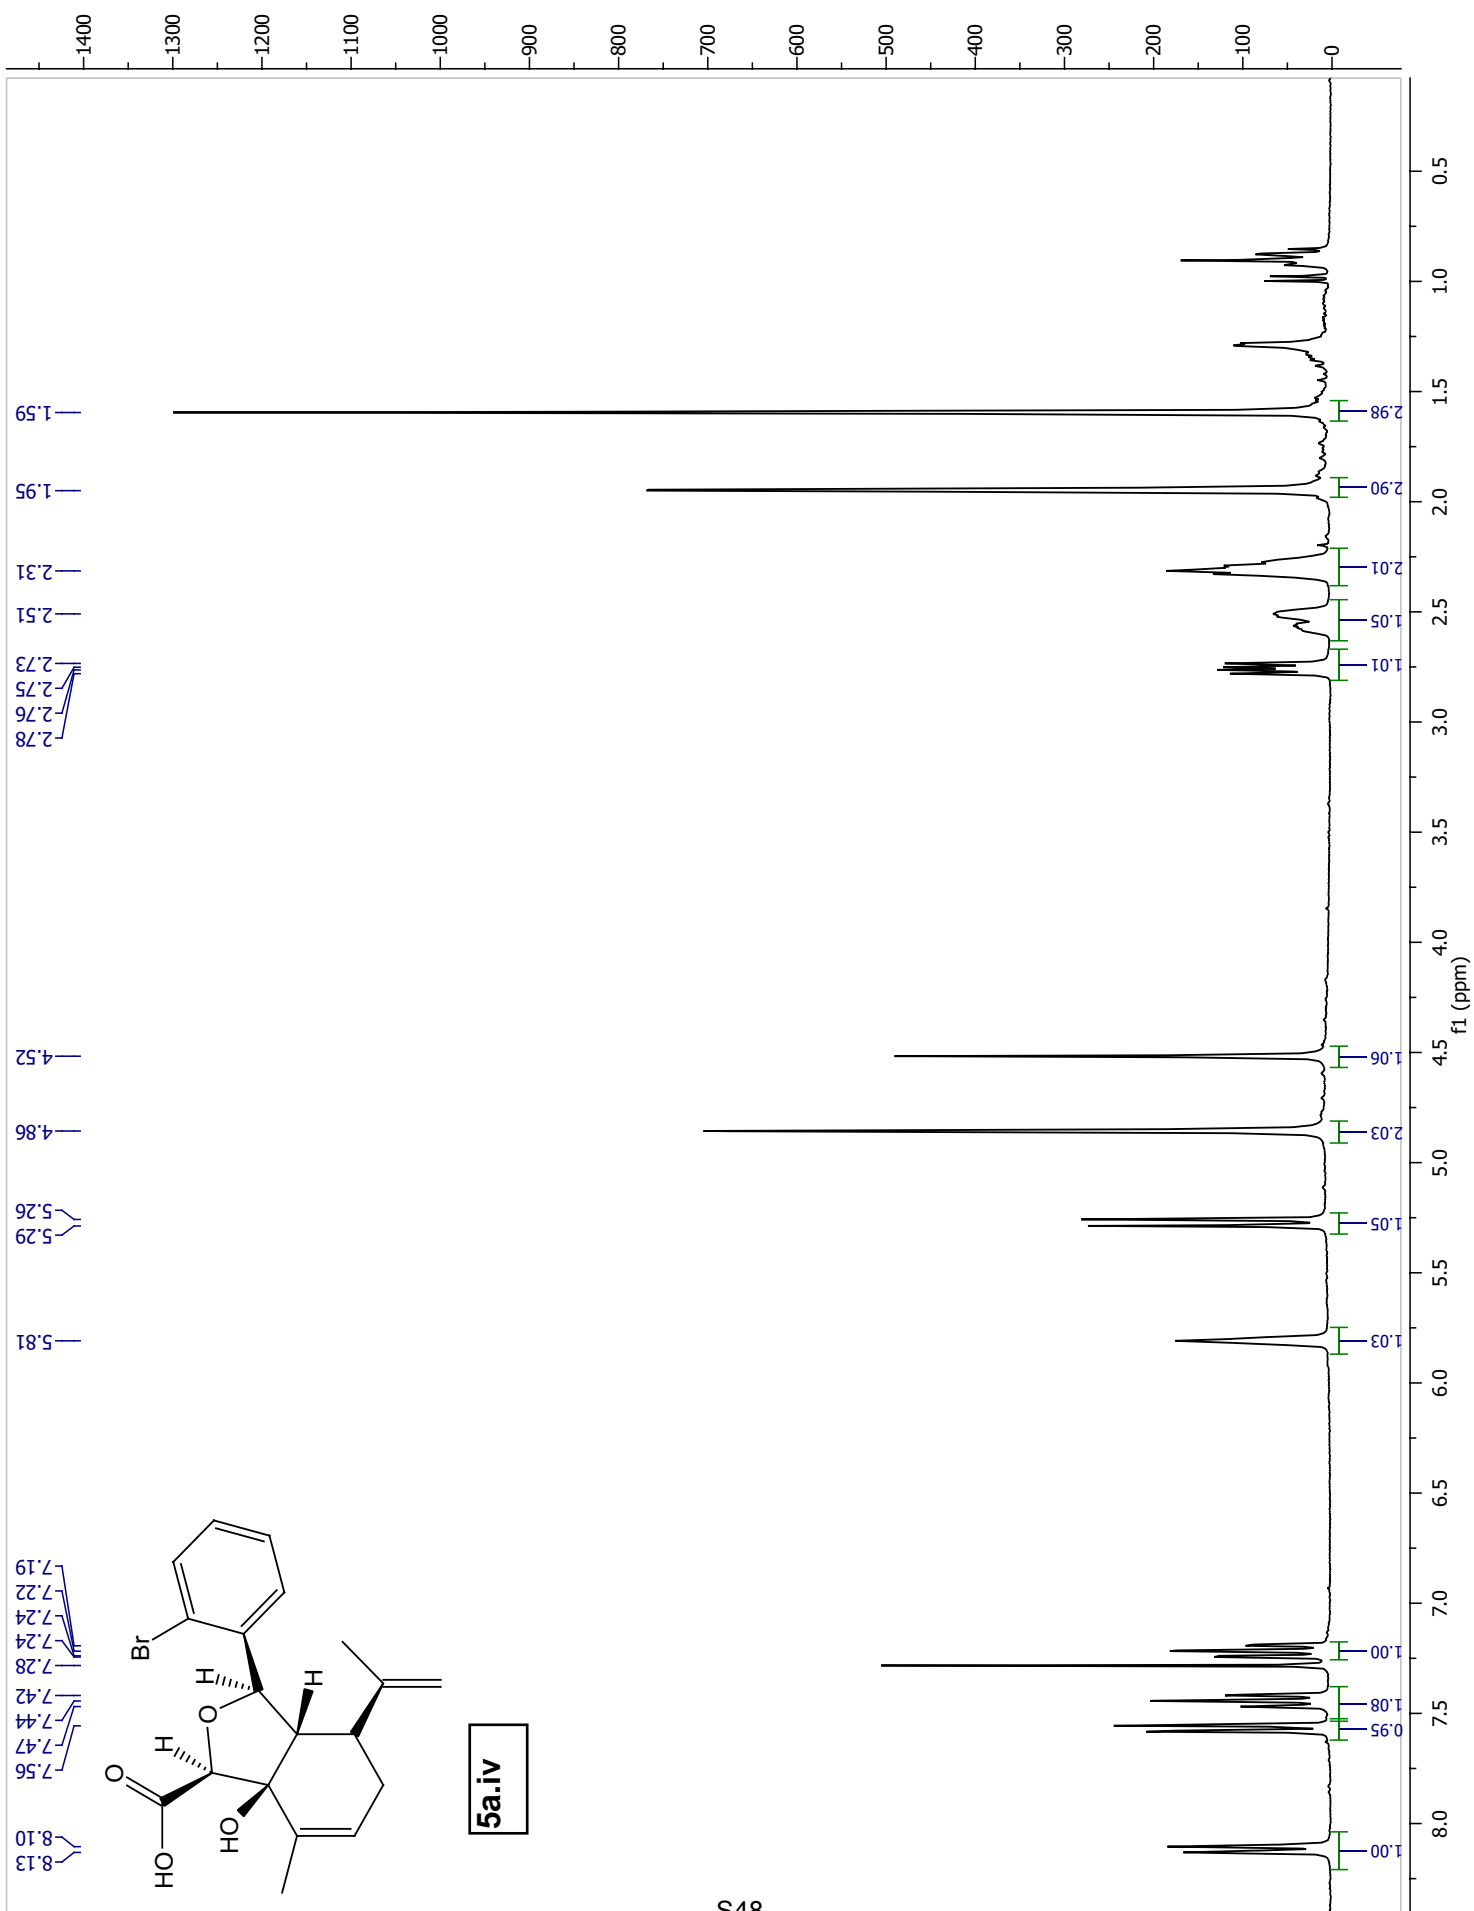

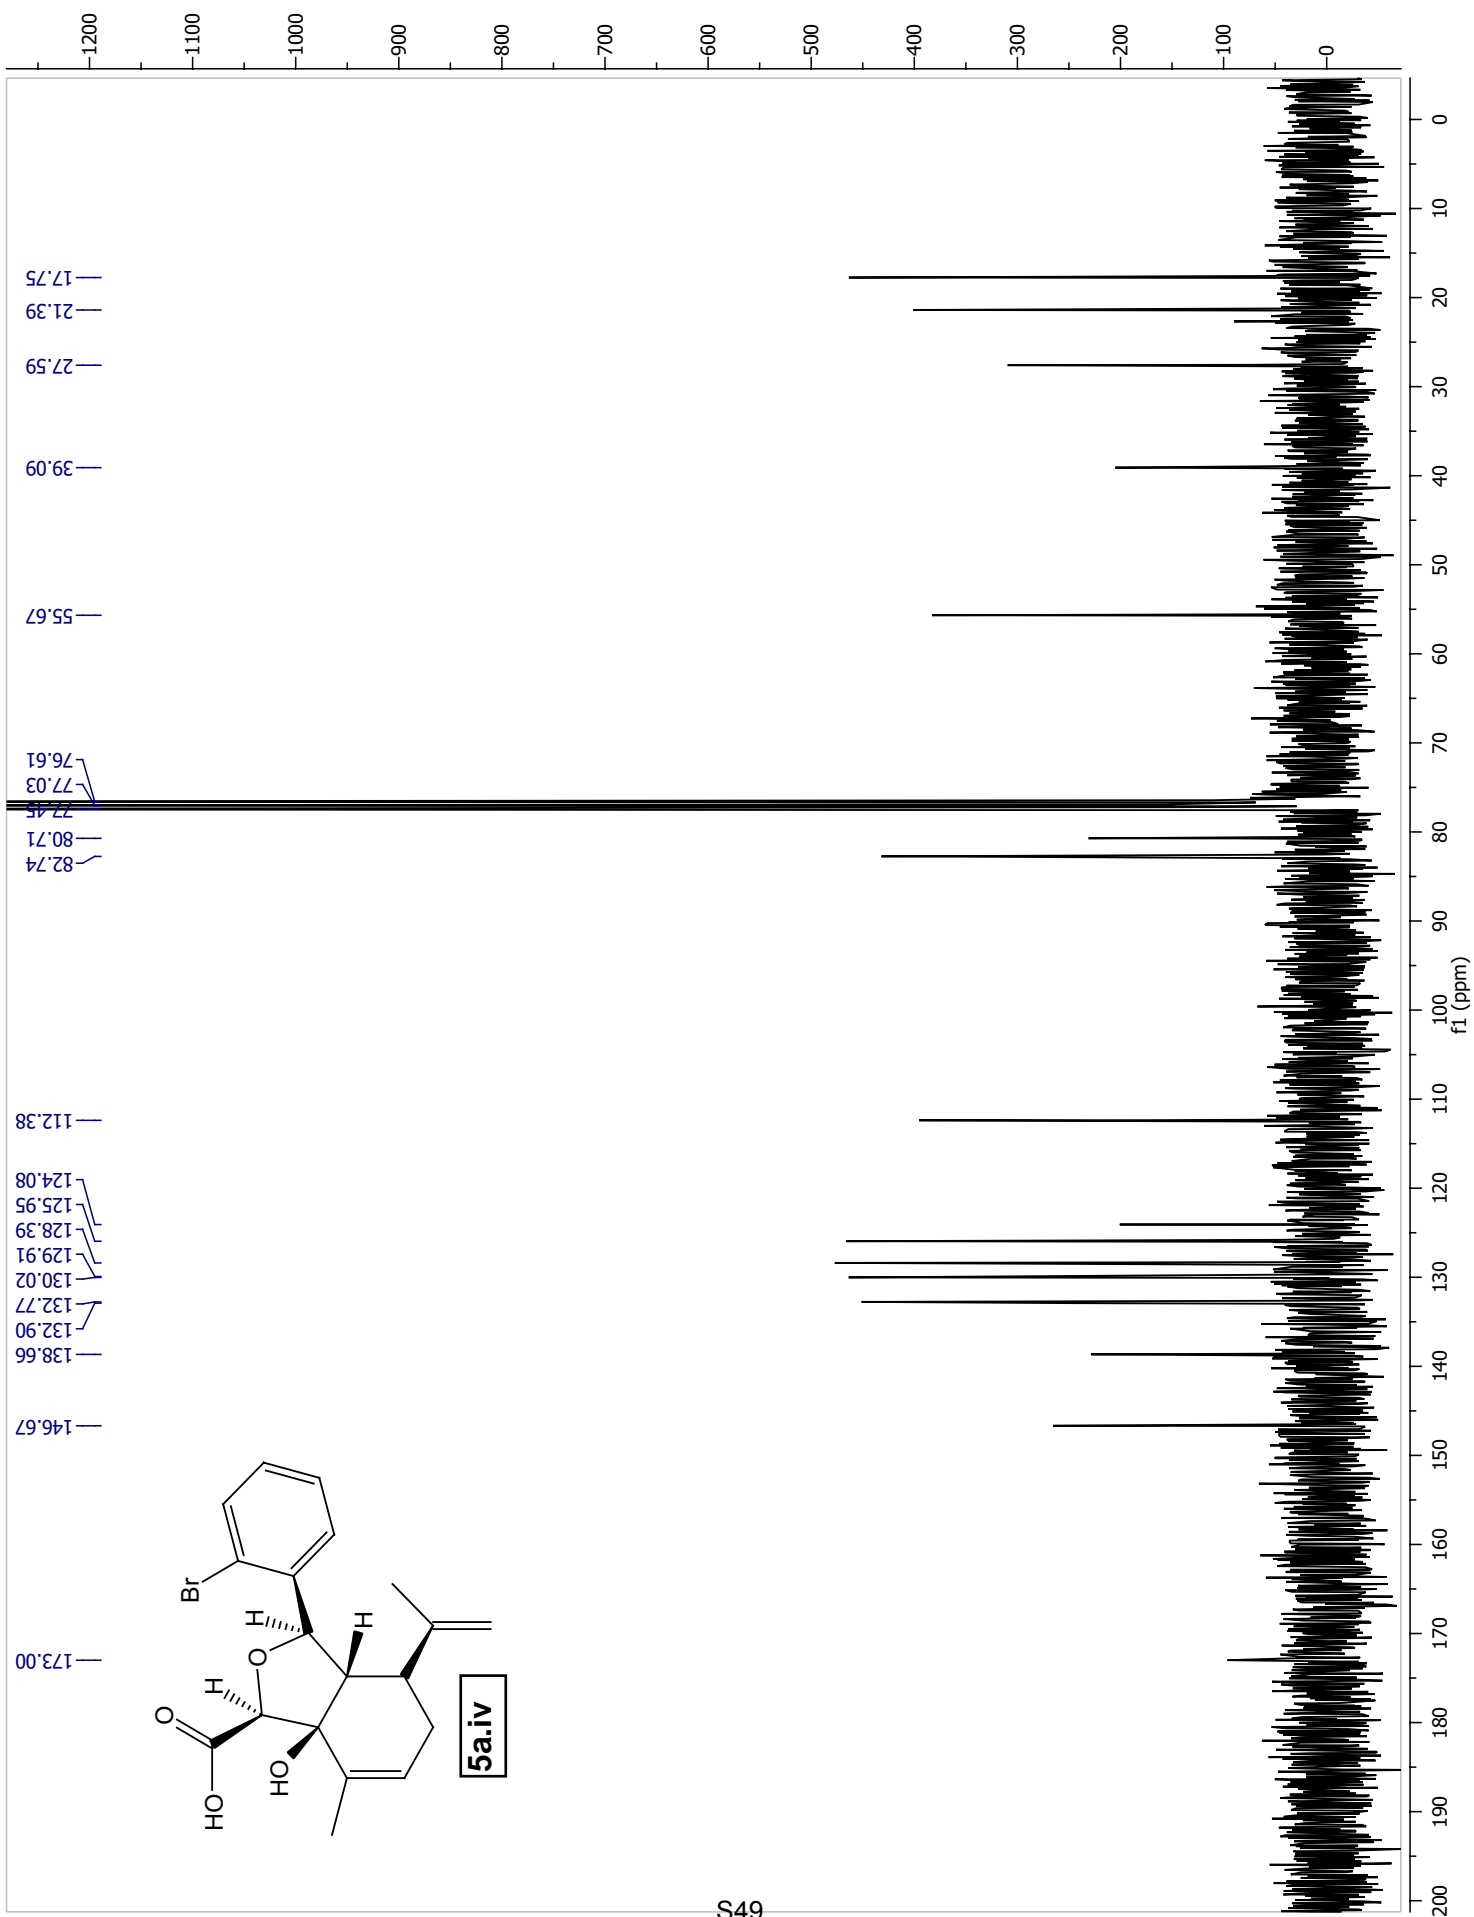

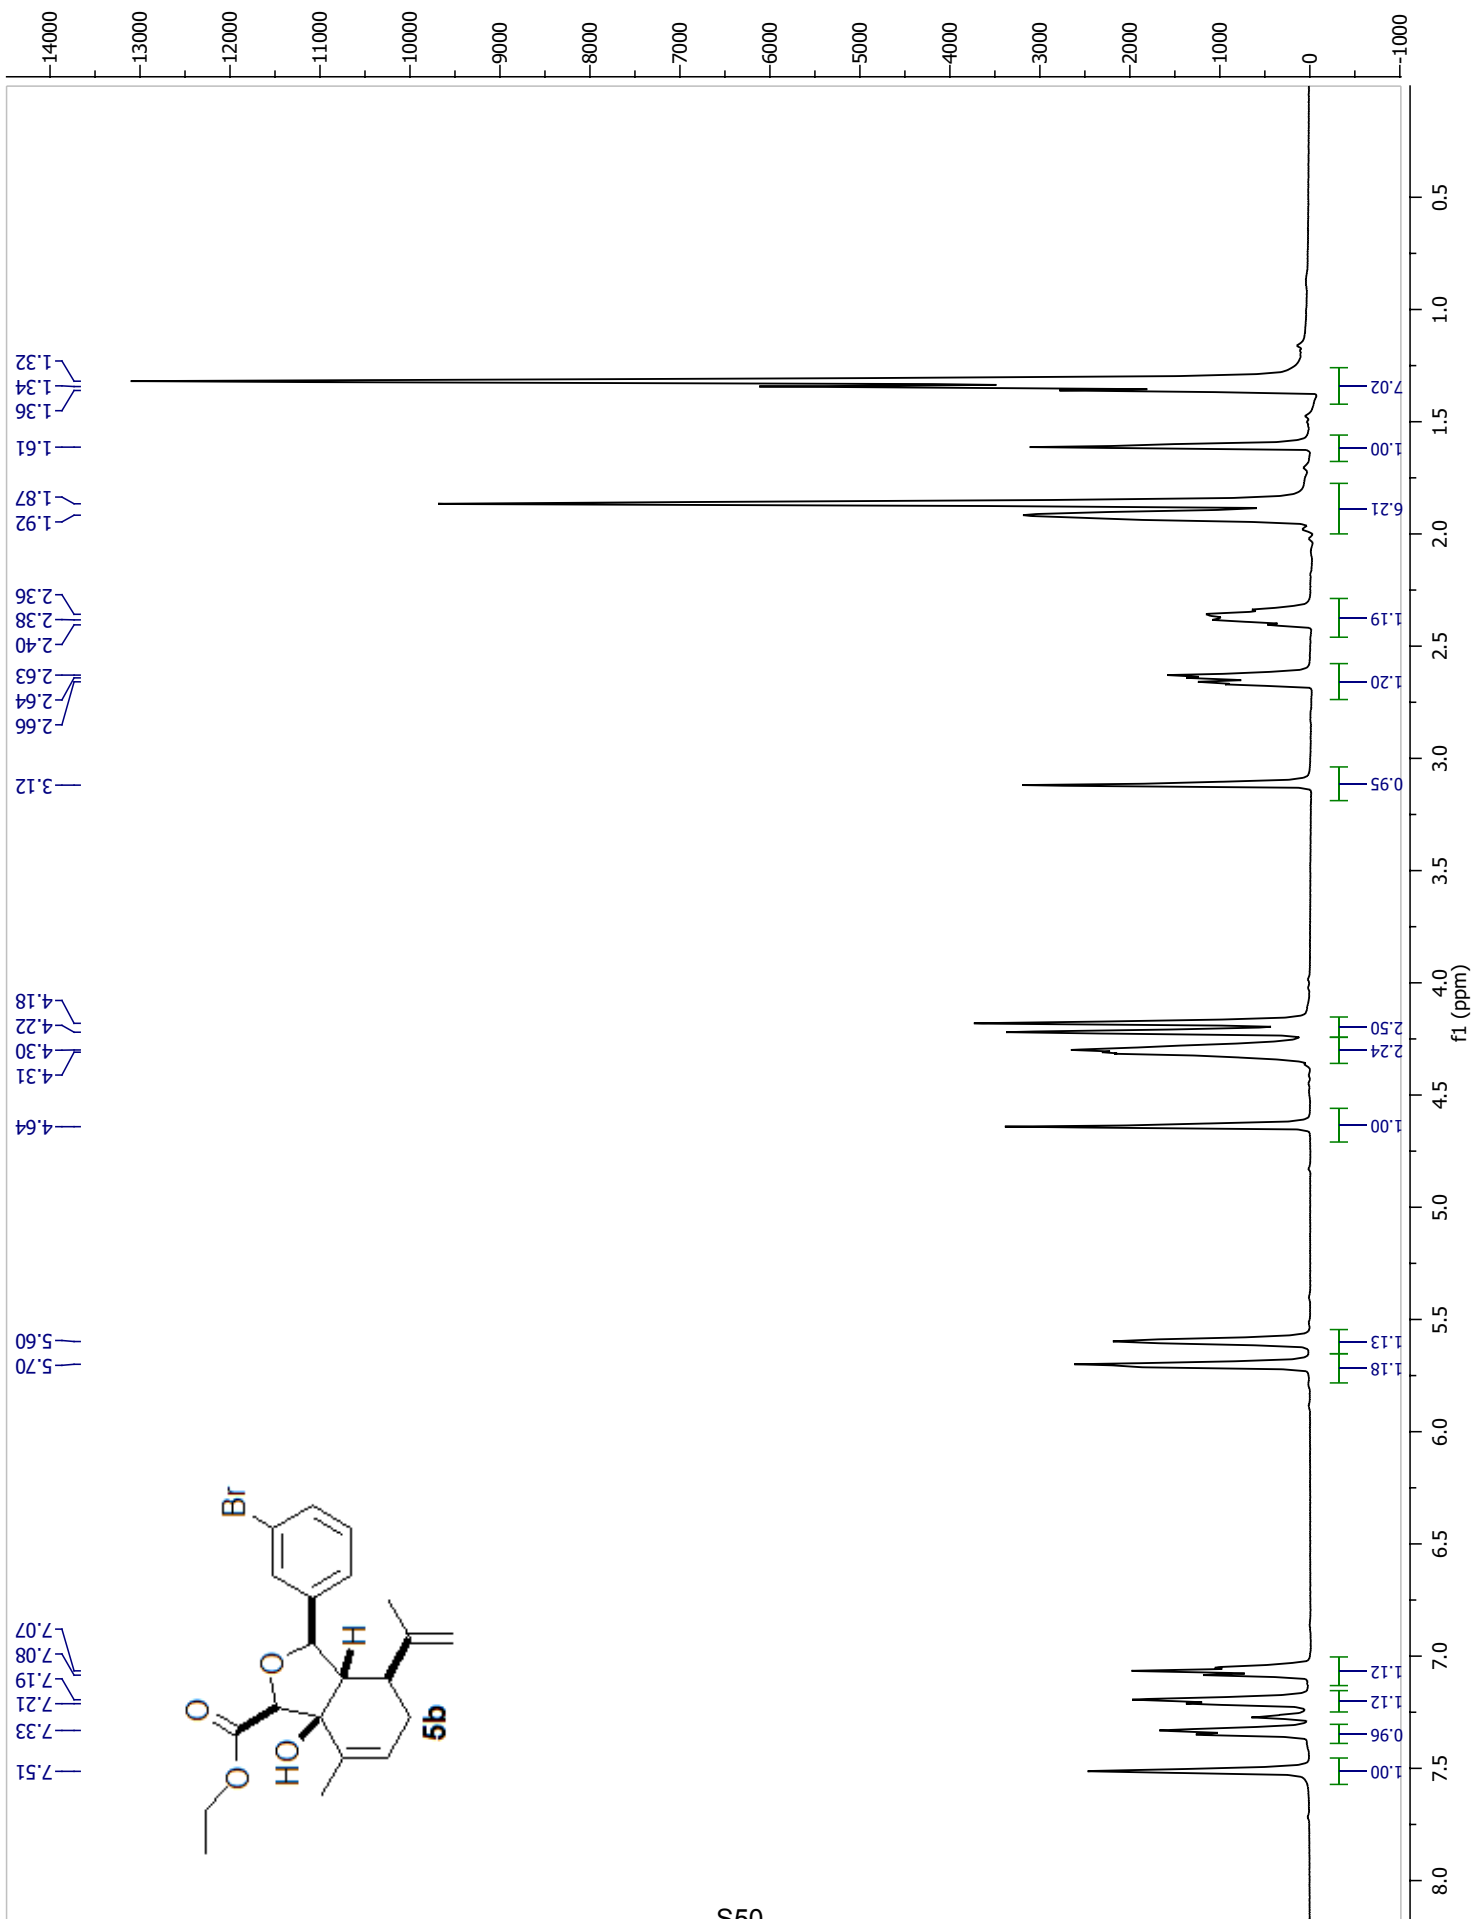

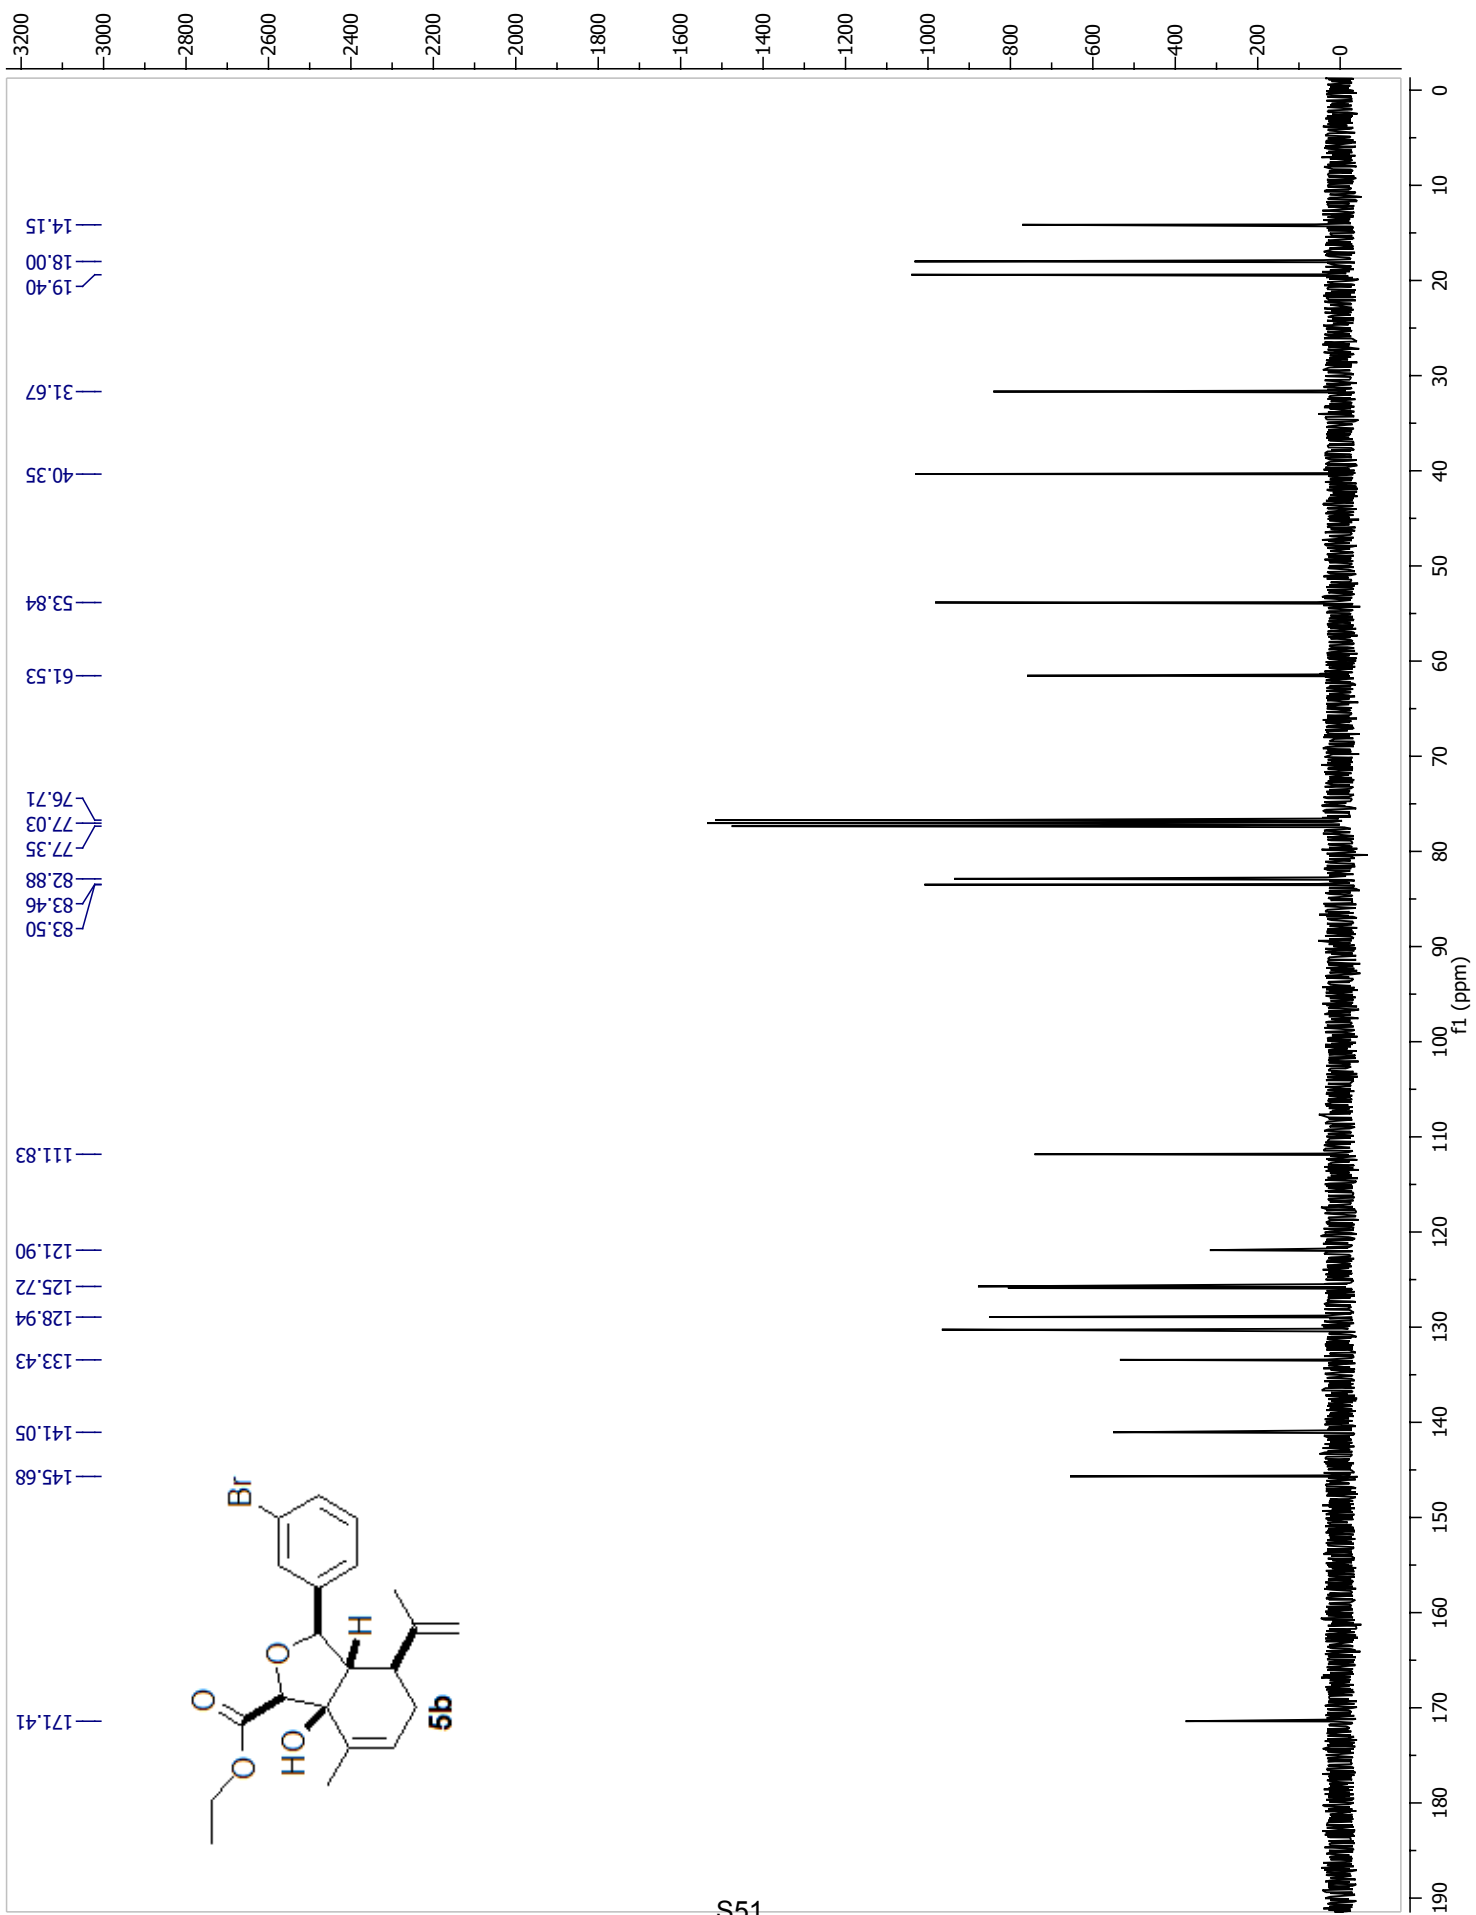

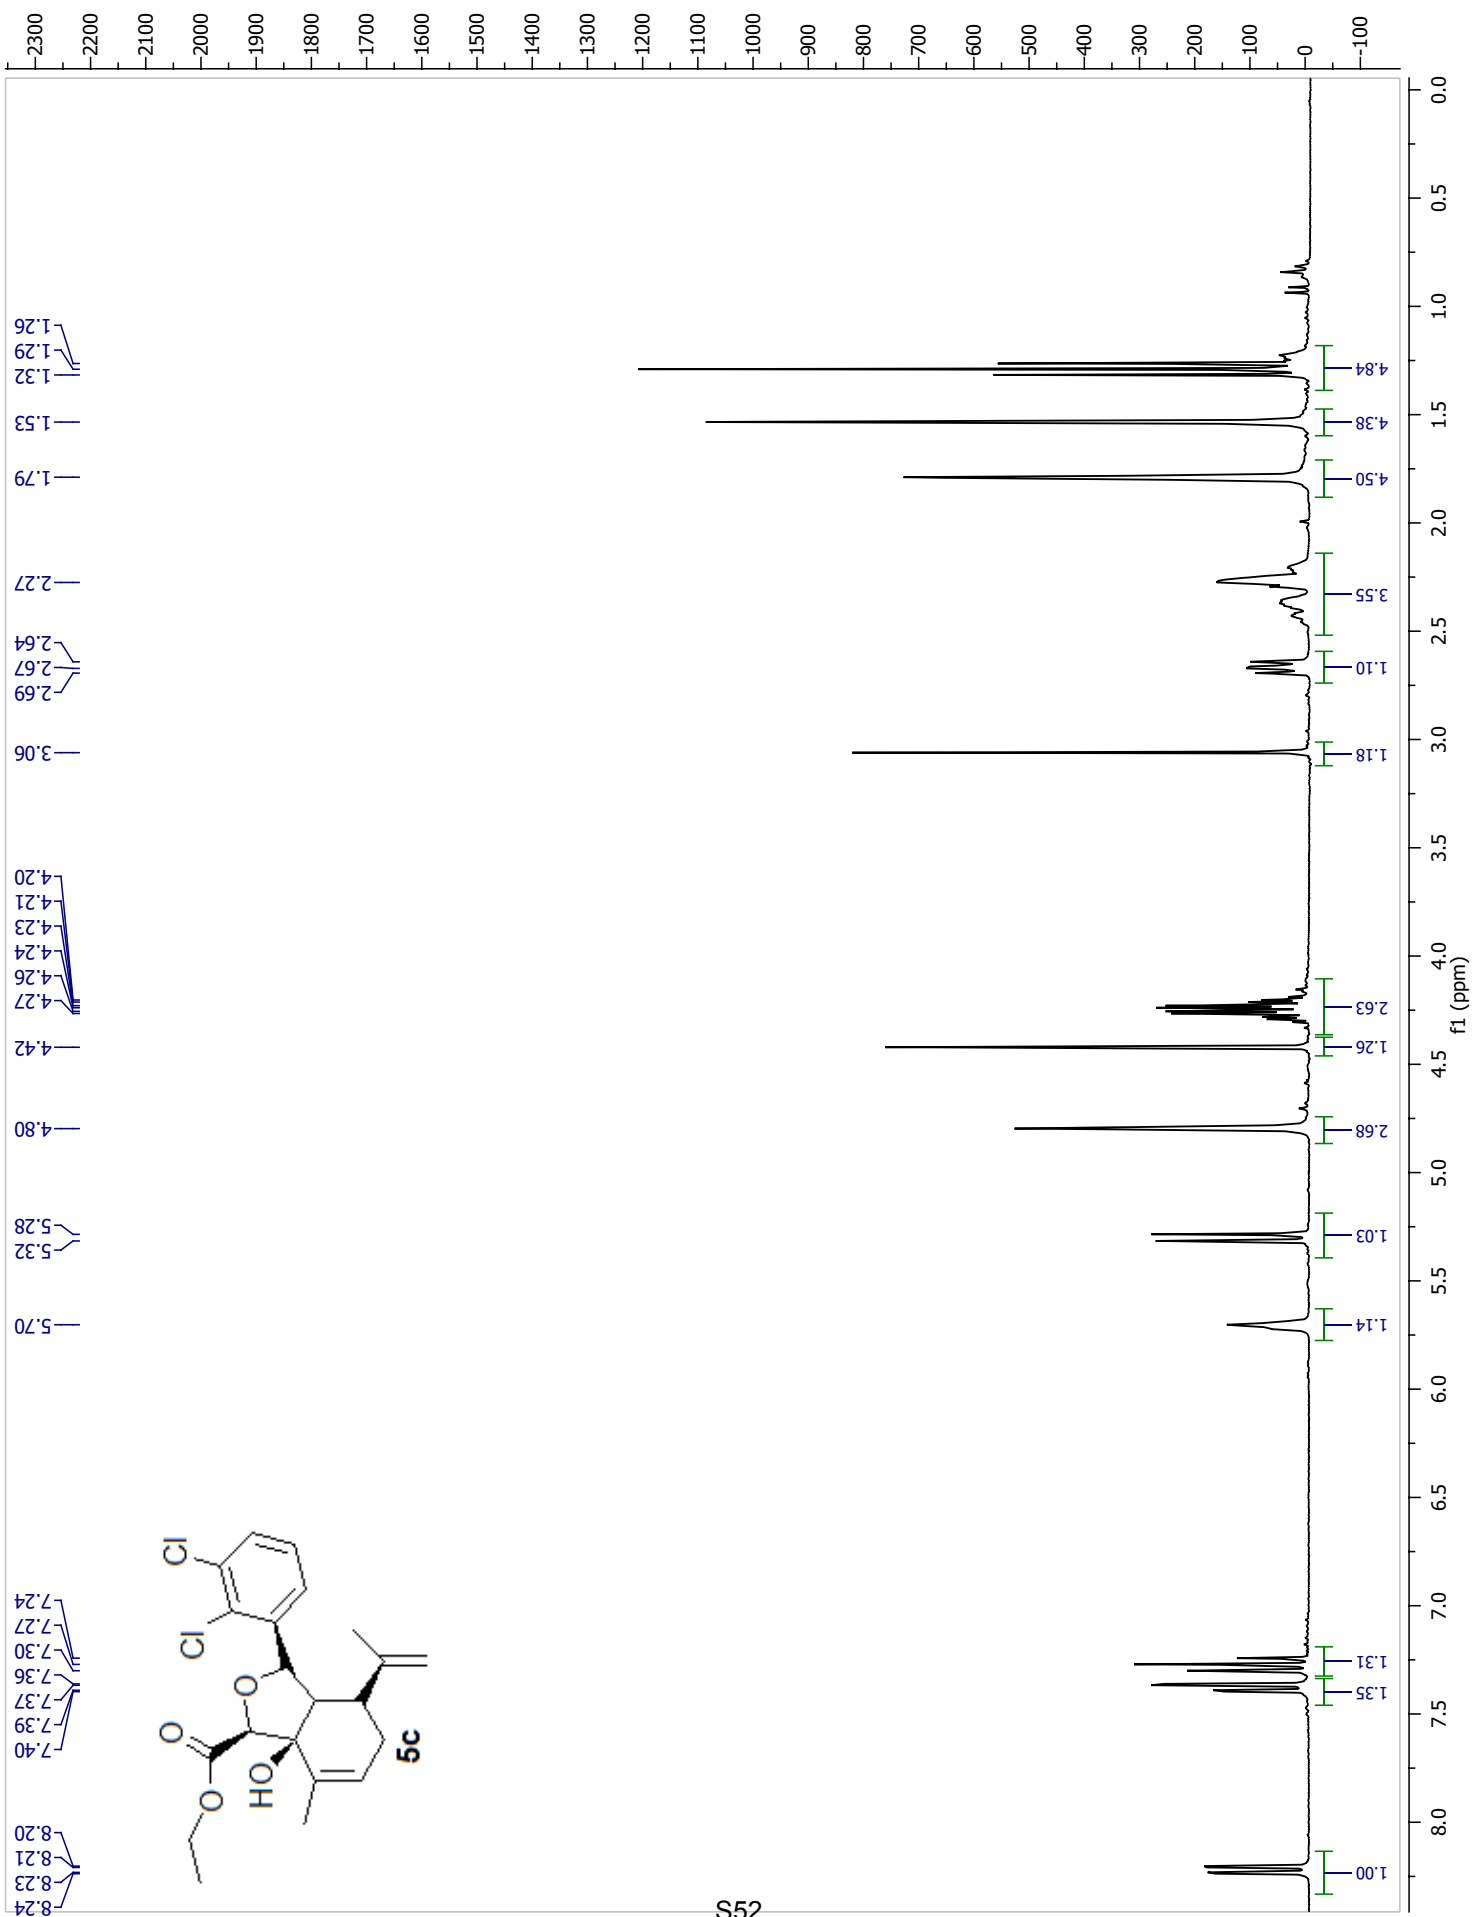

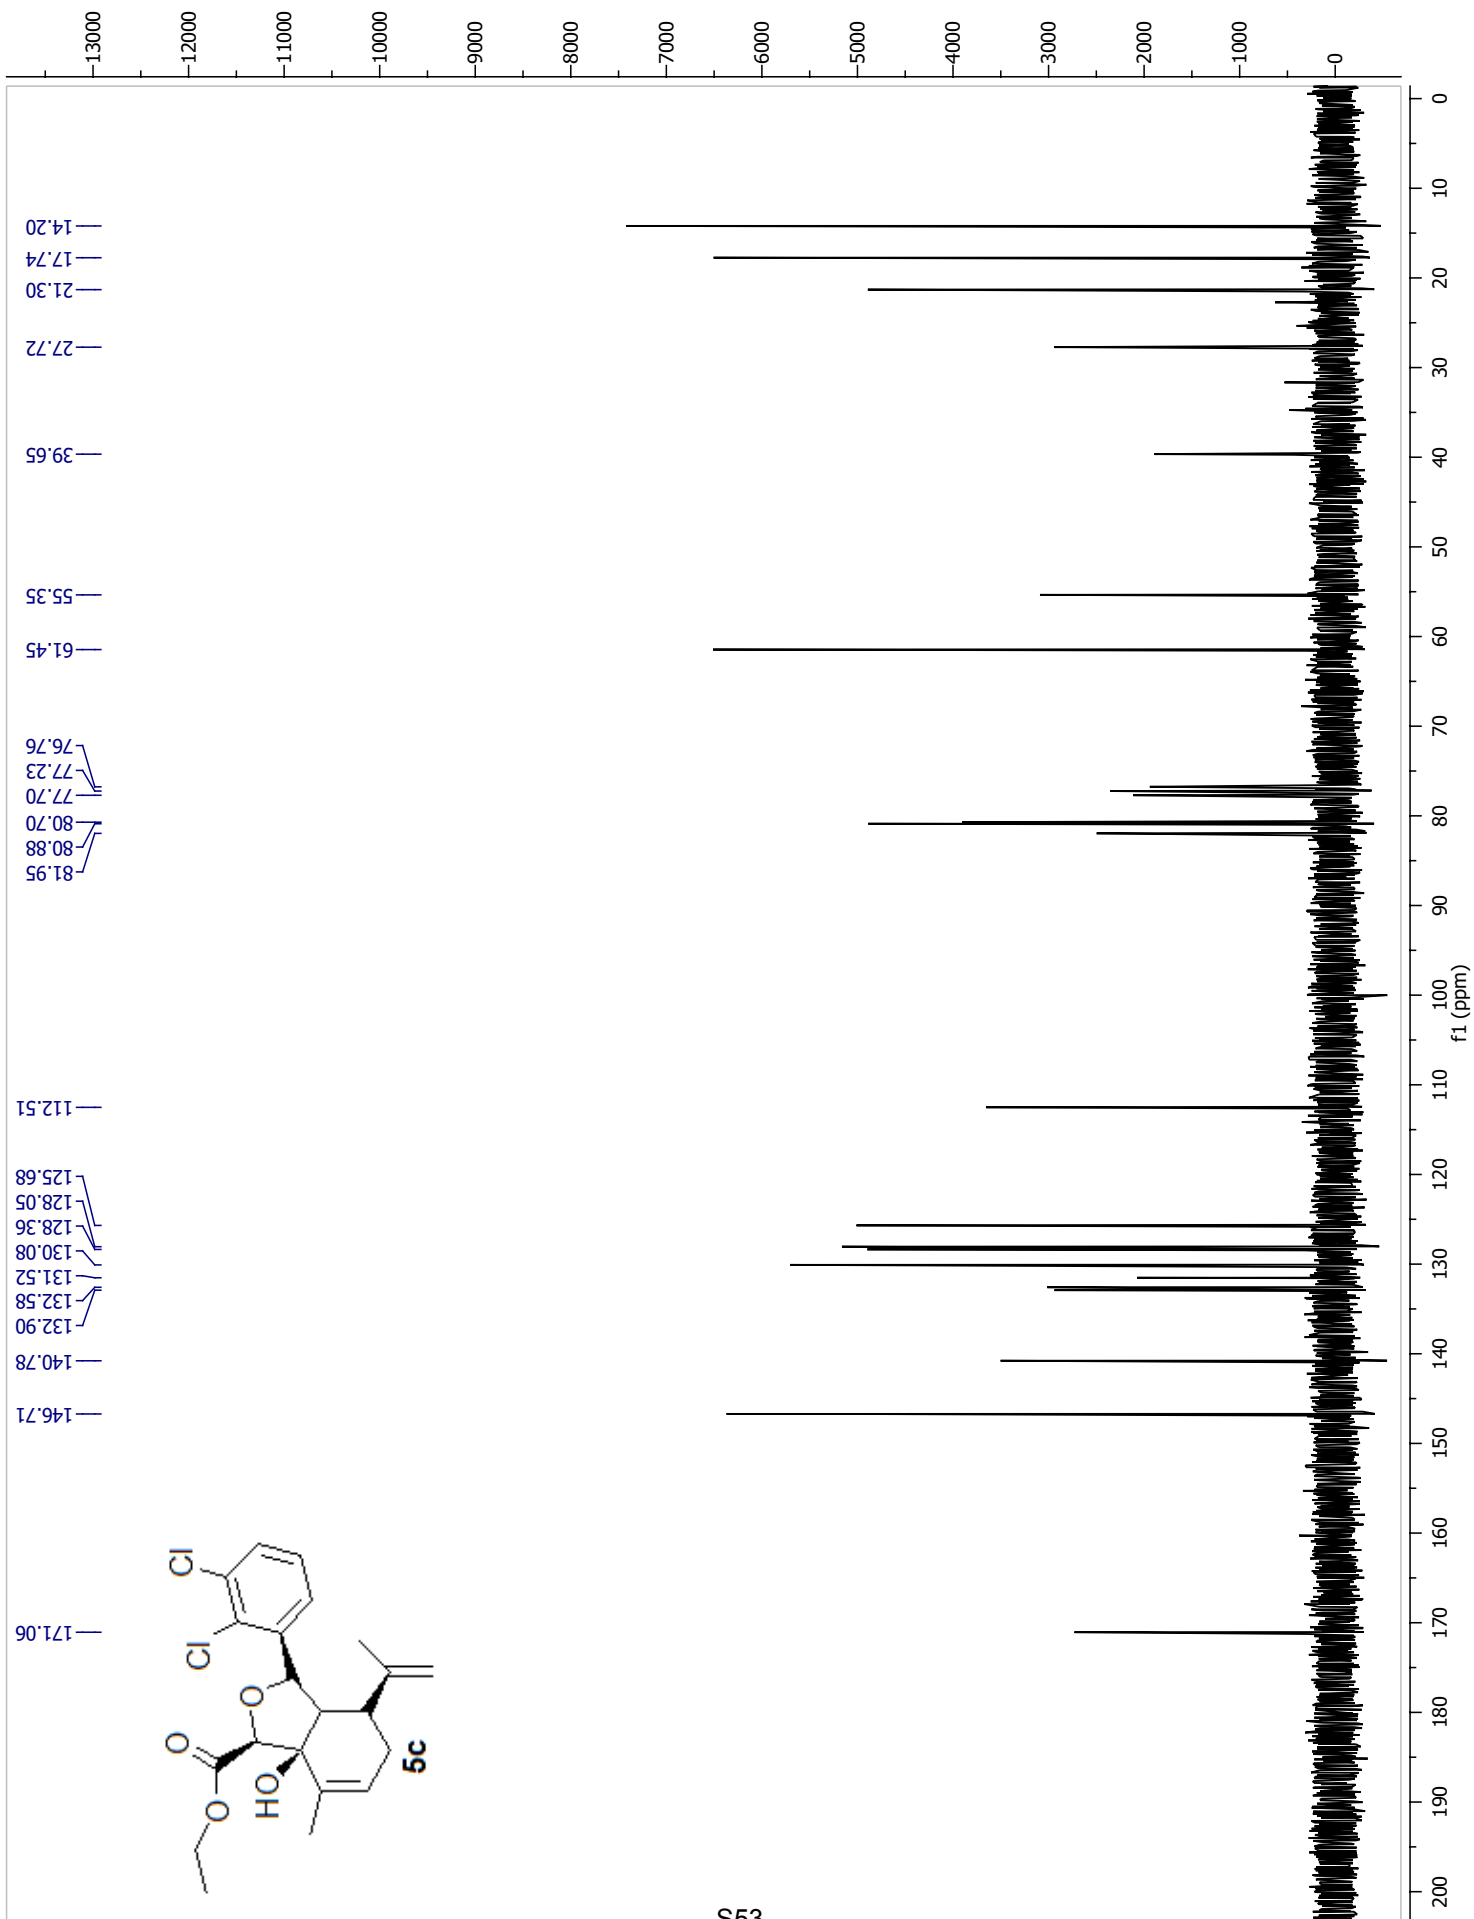

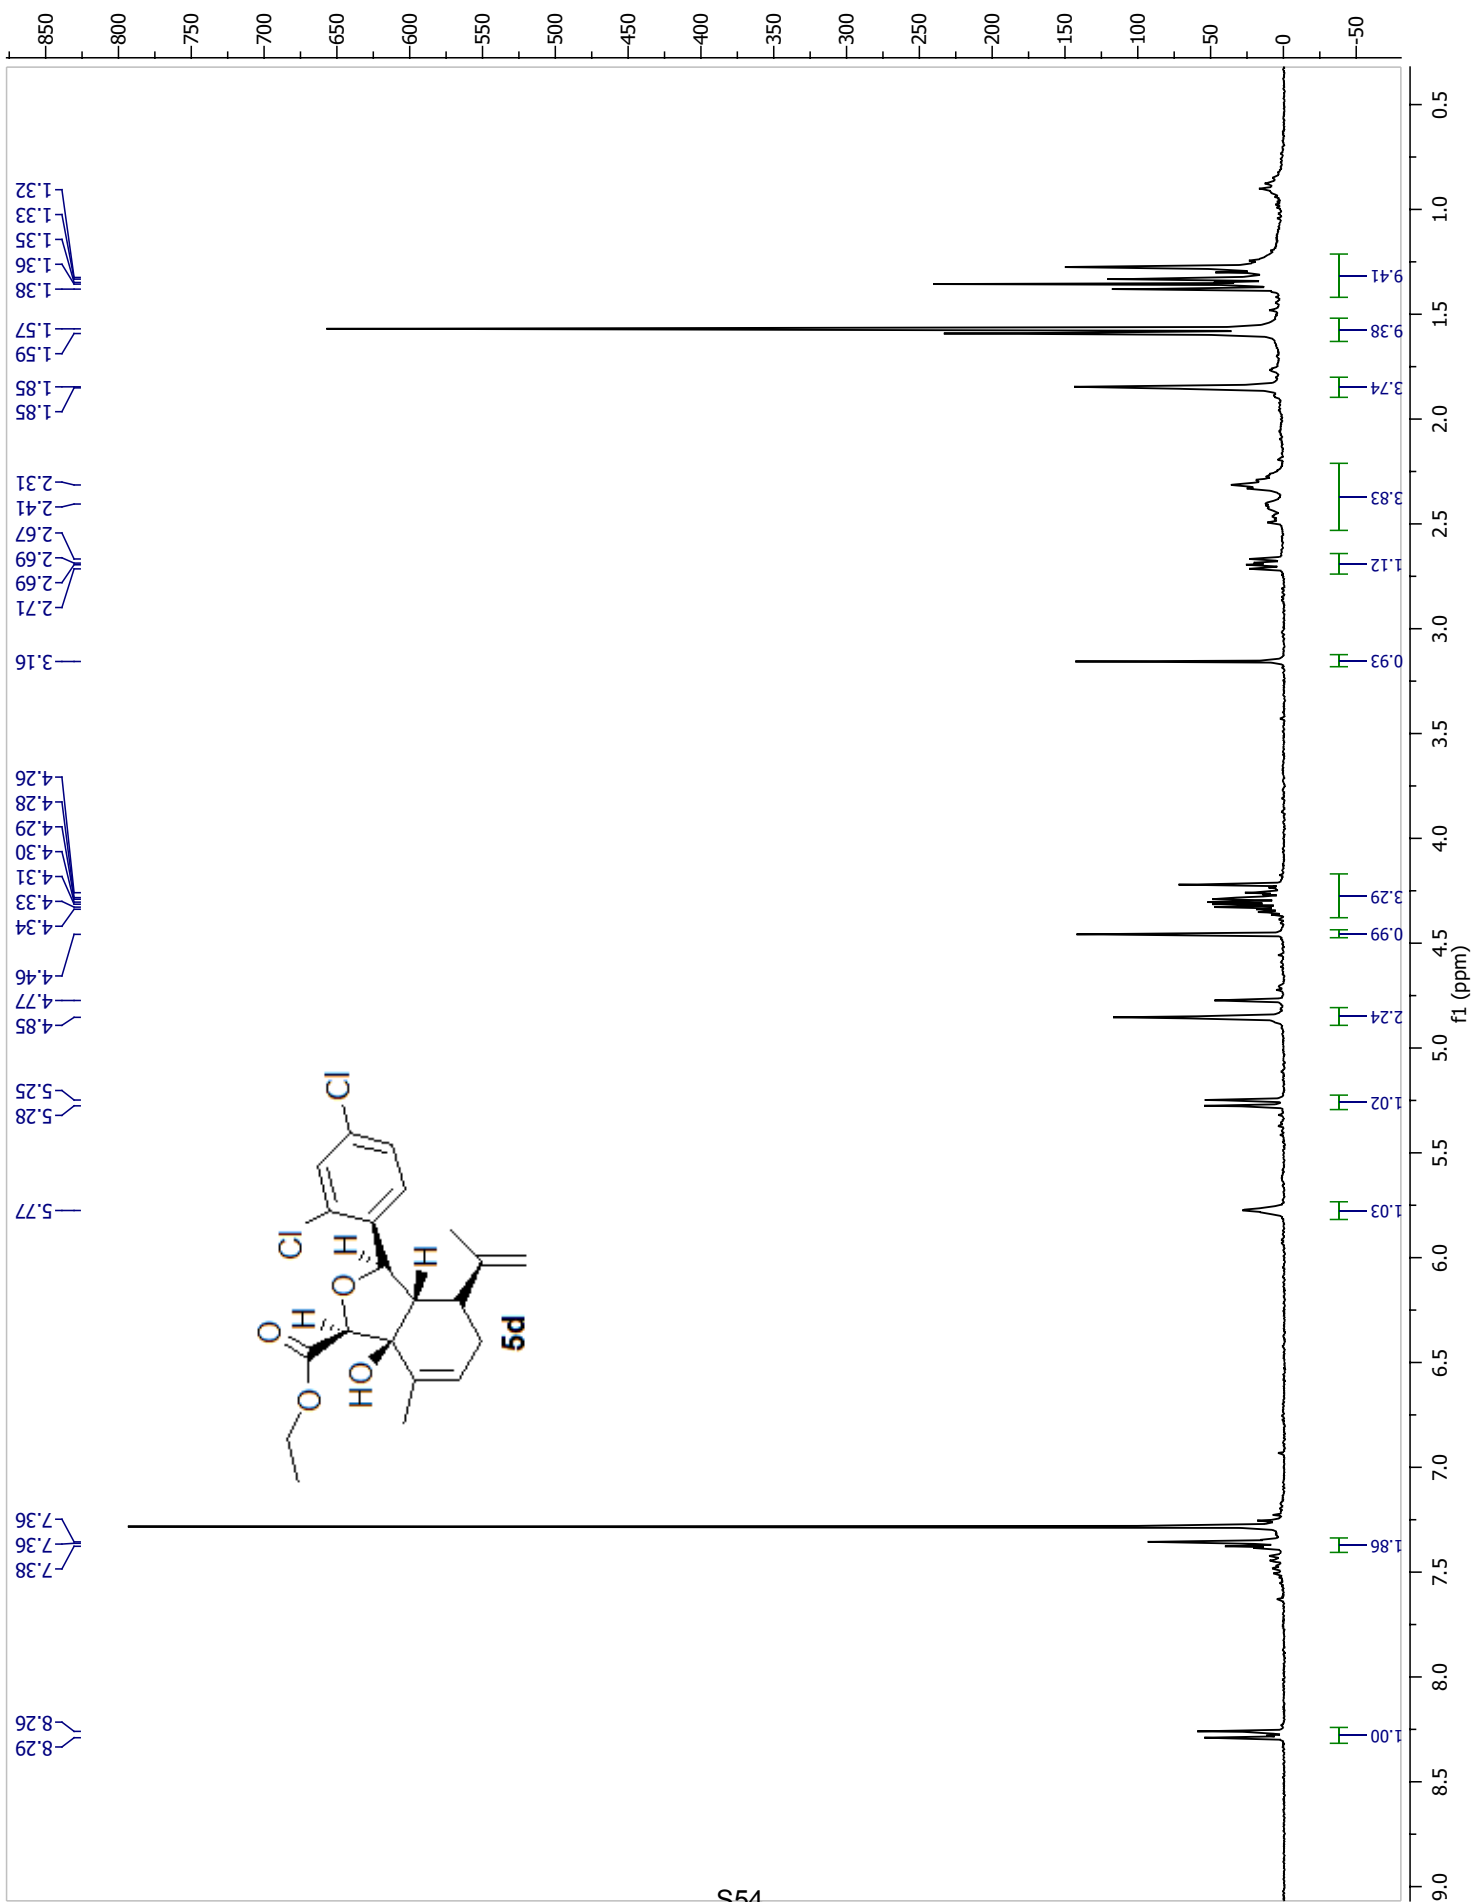

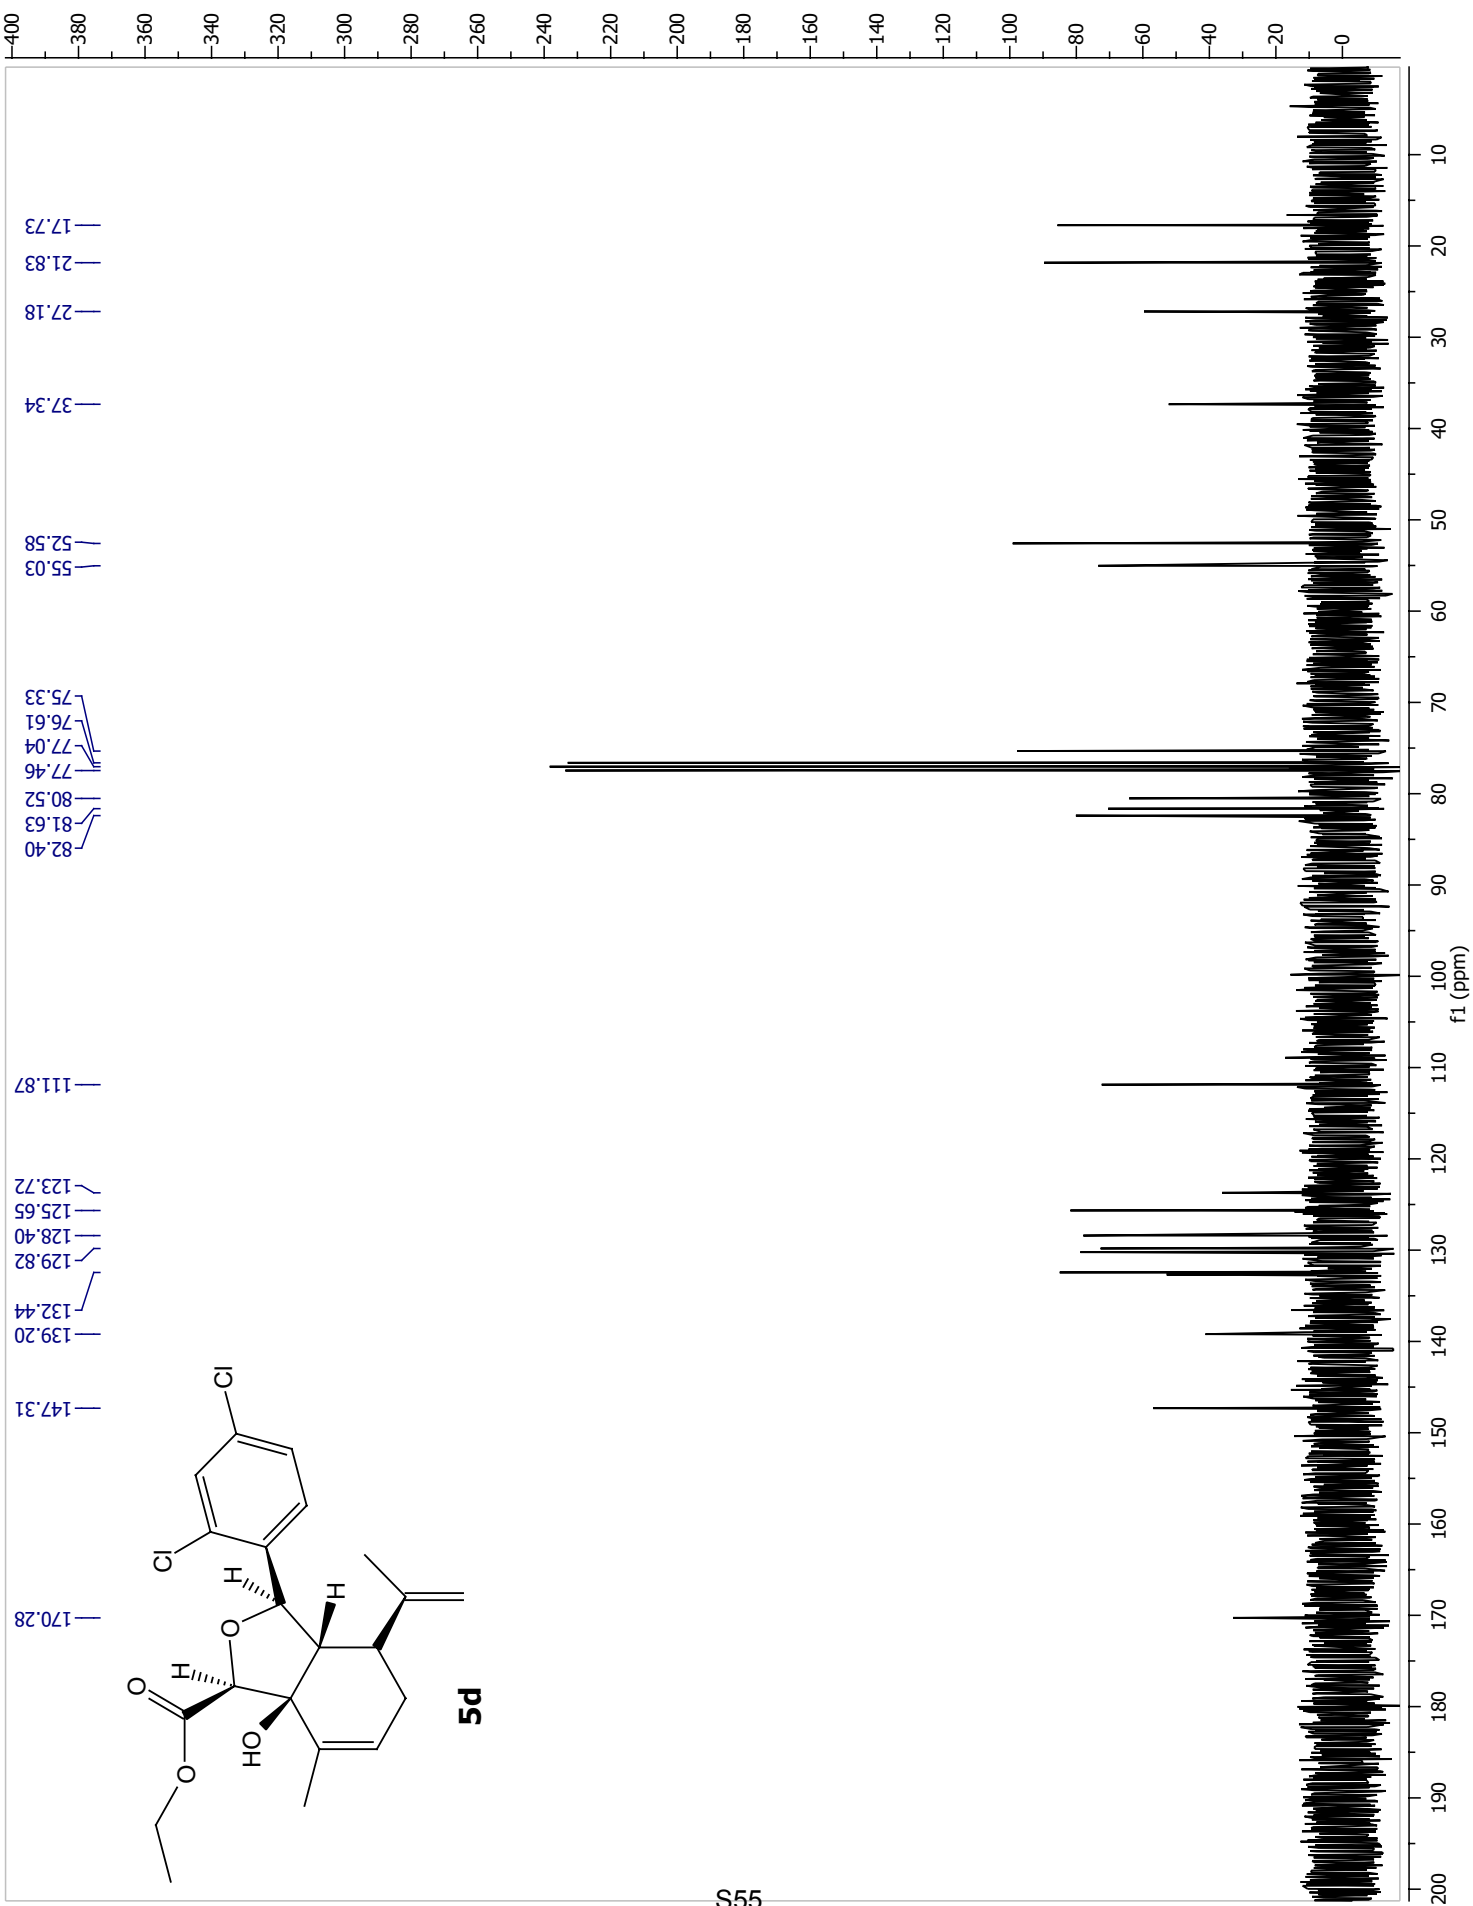

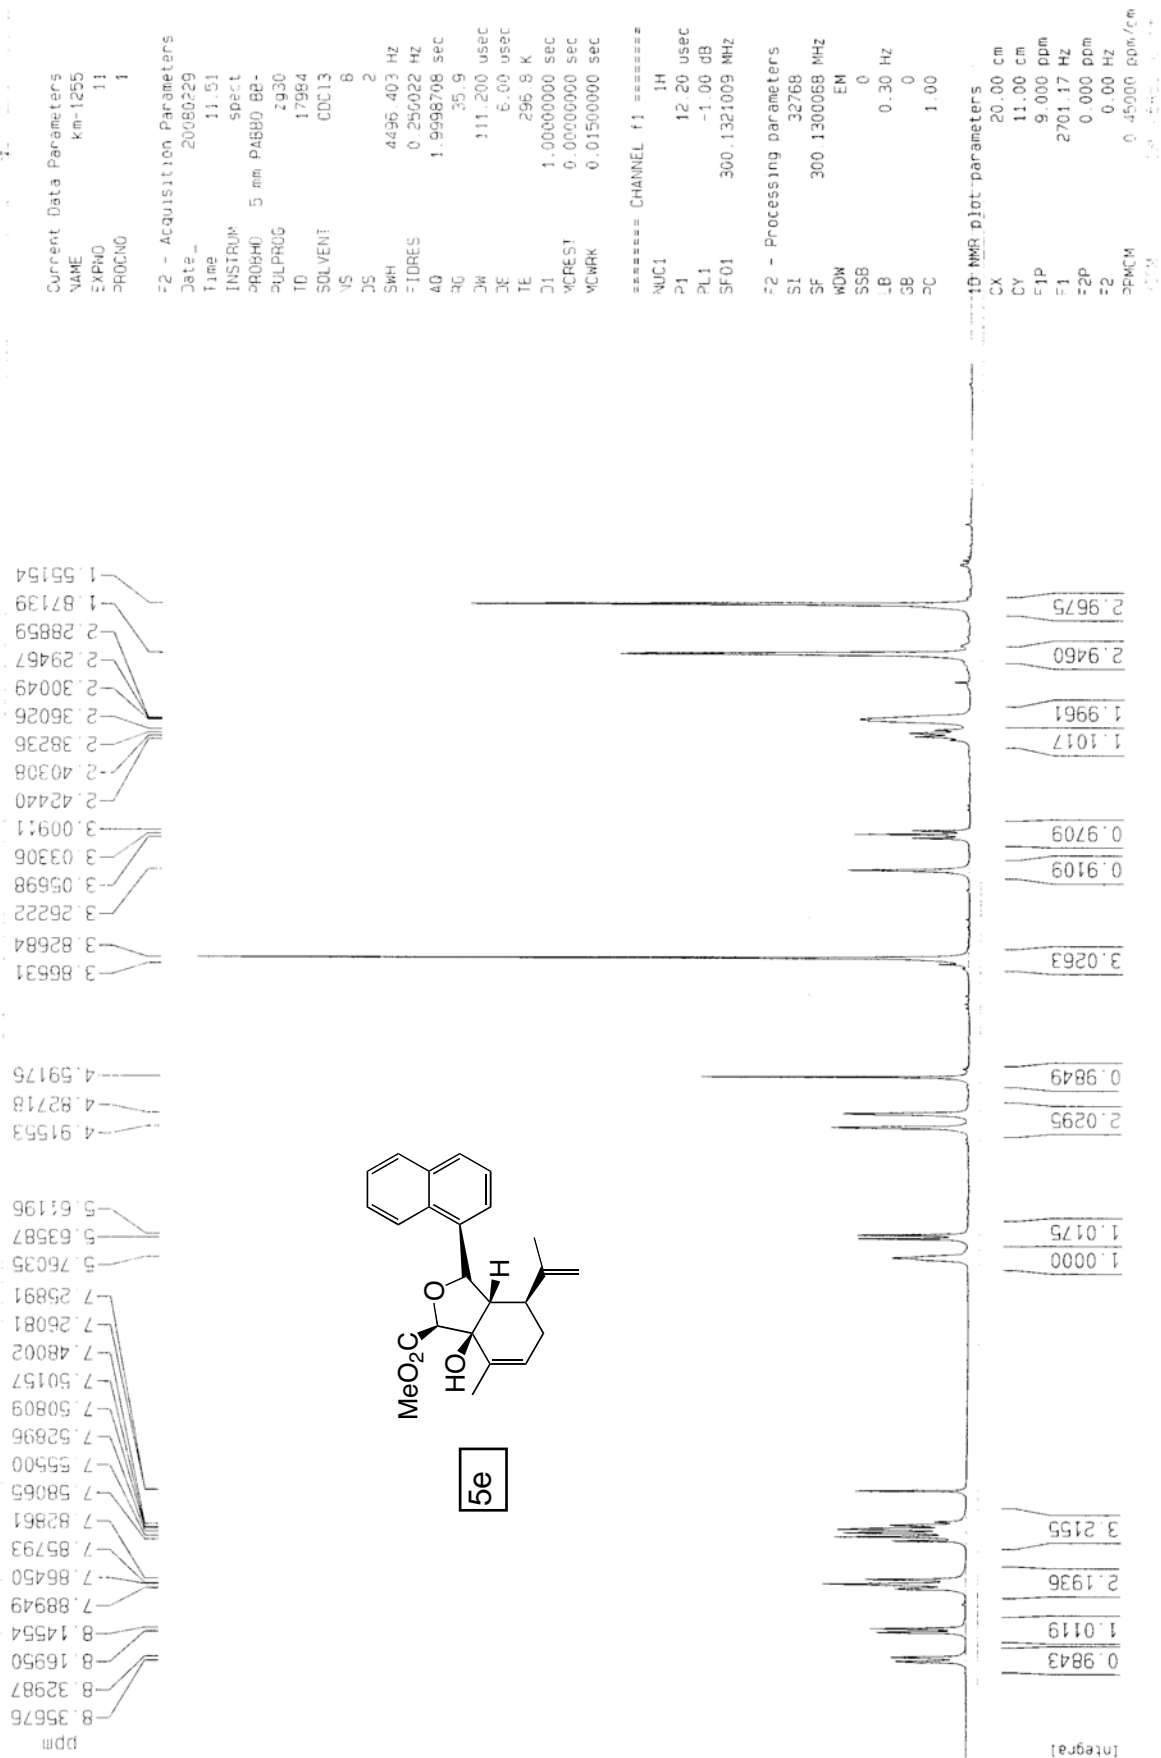

Current Data Parameters

NAME km-1255  
EXPNO 10  
PROCNO 1

F2 - Acquisition Parameters

Date\_ 20080229  
Time 11.48  
INSTRUM spect  
PROBHD 5 mm PABBO BB-  
PULPROG zgpg30  
TD 32768  
SOLVENT CDCl3  
VS 400  
DS 4  
SWH 18115.941 Hz  
FIDRES 0.555601 Hz  
AQ 0.899756 sec  
RG 23170.5  
CW 27.600 usec  
DE 6.00 usec  
TE 297.1 K  
D1 2.00000000 sec  
D11 0.03000000 sec  
DELTA 1.89599988 sec  
WCREST 0.00000000 sec  
WVWRK 0.01500000 sec

===== CHANNEL f1 =====

NUC1 13C  
P1 8.38 usec  
PL1 -2.80 dB  
SF01 75.4760505 MHz

===== CHANNEL f2 =====

CPDPRG2 waltz16  
NUC2 1H  
PCPD2 60.00 usec  
PL2 -1.00 dB  
PL12 15.33 dB  
PL13 16.00 dB  
SF02 300.1312005 MHz

F2 - Processing parameters

SF 32768  
SF 75.4677447 MHz  
WDW EM  
SSB 0  
LB 1.00 Hz  
GB 0  
PC 1.40

1D NMR plot parameters

CX 20.00 cm  
CY 10.00 cm  
F1P 200.000 ppm  
F1 15092.55 Hz  
F2P 0.000 ppm  
F2 300.1312005 MHz  
F3P 0.000 ppm  
F3 454.1836000 MHz

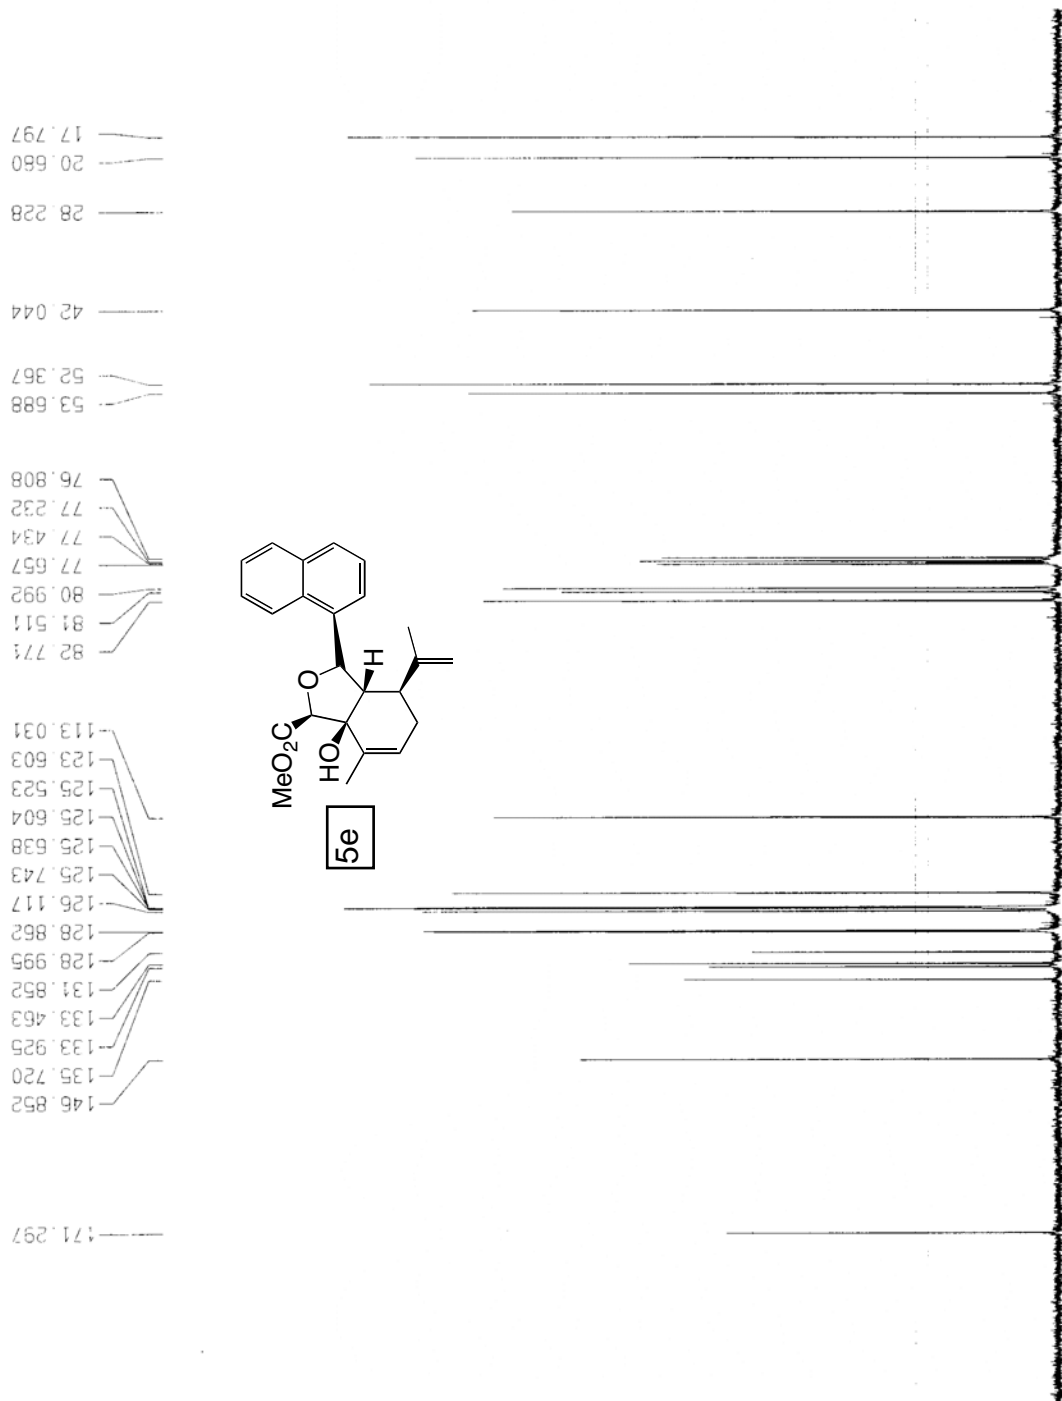

7

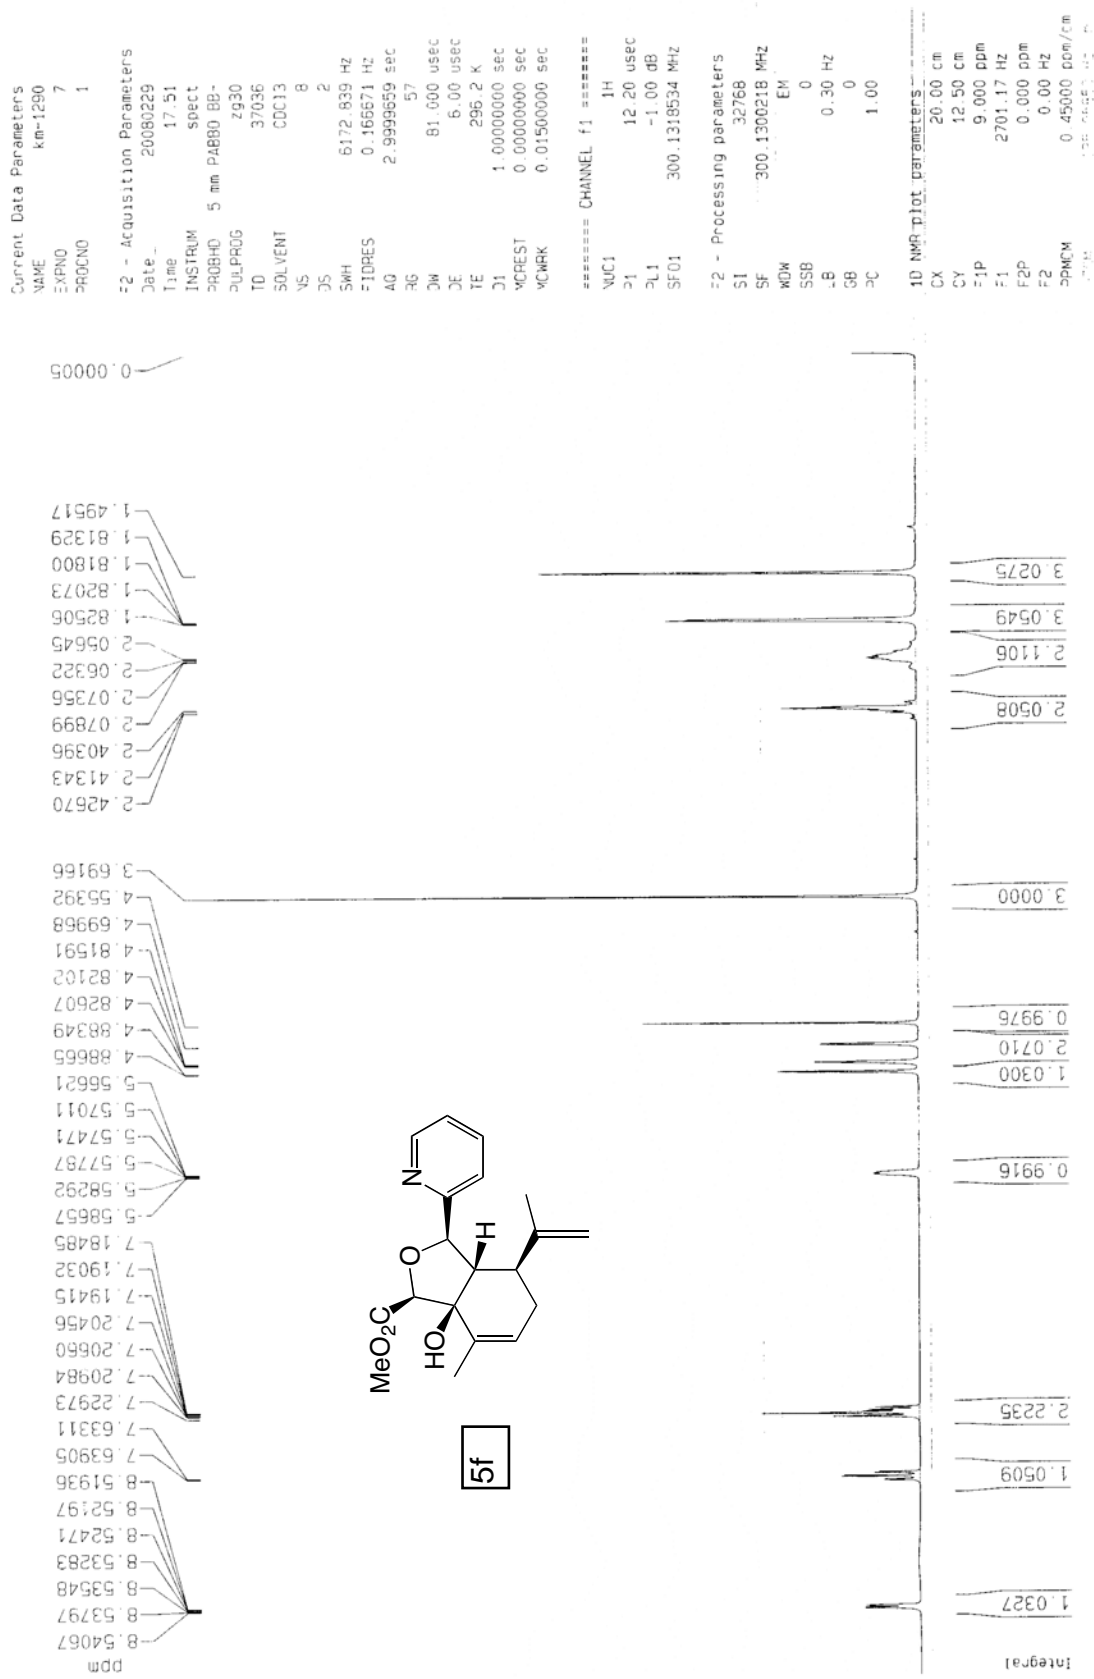

Current Data Parameters  
NAME KB-1290  
EXPNO 8  
PROCNO 1

F2 - Acquisition Parameters  
Date\_ 20080229  
Time 18:45  
INSTRUM spect  
PROBHD 5 mm PABBO BB-  
PULPROG zgpg30  
TD 35868  
SOLVENT CDCl3  
NS 1024  
DS 4  
SWH 17985.611 Hz  
FIDRES 0.500045 Hz  
AQ 0.999604 sec  
RG 23.70.5  
WM 27.600 usec  
DE 6.00 usec  
TE 296.9 K  
D1 2.00000000 sec  
d11 0.03000000 sec  
DELTA 1.89999999 sec  
XRES 0.00000000 sec  
MCRR 0.01500000 sec

===== CHANNEL f1 =====  
NUC1 13C  
P1 8.38 usec  
PL1 -2.80 dB  
SF01 75.4760505 MHz

===== CHANNEL f2 =====  
CPDPRG2 waltz16  
NUC2 1H  
PCPD2 80.00 usec  
PL2 -1.00 dB  
PL12 15.33 dB  
PL13 16.00 dB  
SF02 300.1312005 MHz

F2 - Processing parameters  
SI 32768  
SF 75.4677395 MHz  
WDW EM  
SSB 0  
LB 1.00 Hz  
GB 0  
PC 1.40

1D NMR plot parameters  
CX 20.00 cm  
CY 10.00 cm  
F1F 200.000 ppm  
PC 155.54 Hz  
AQ 0.999604 sec  
RG 23.70.5  
WM 27.600 usec  
DE 6.00 usec  
TE 296.9 K

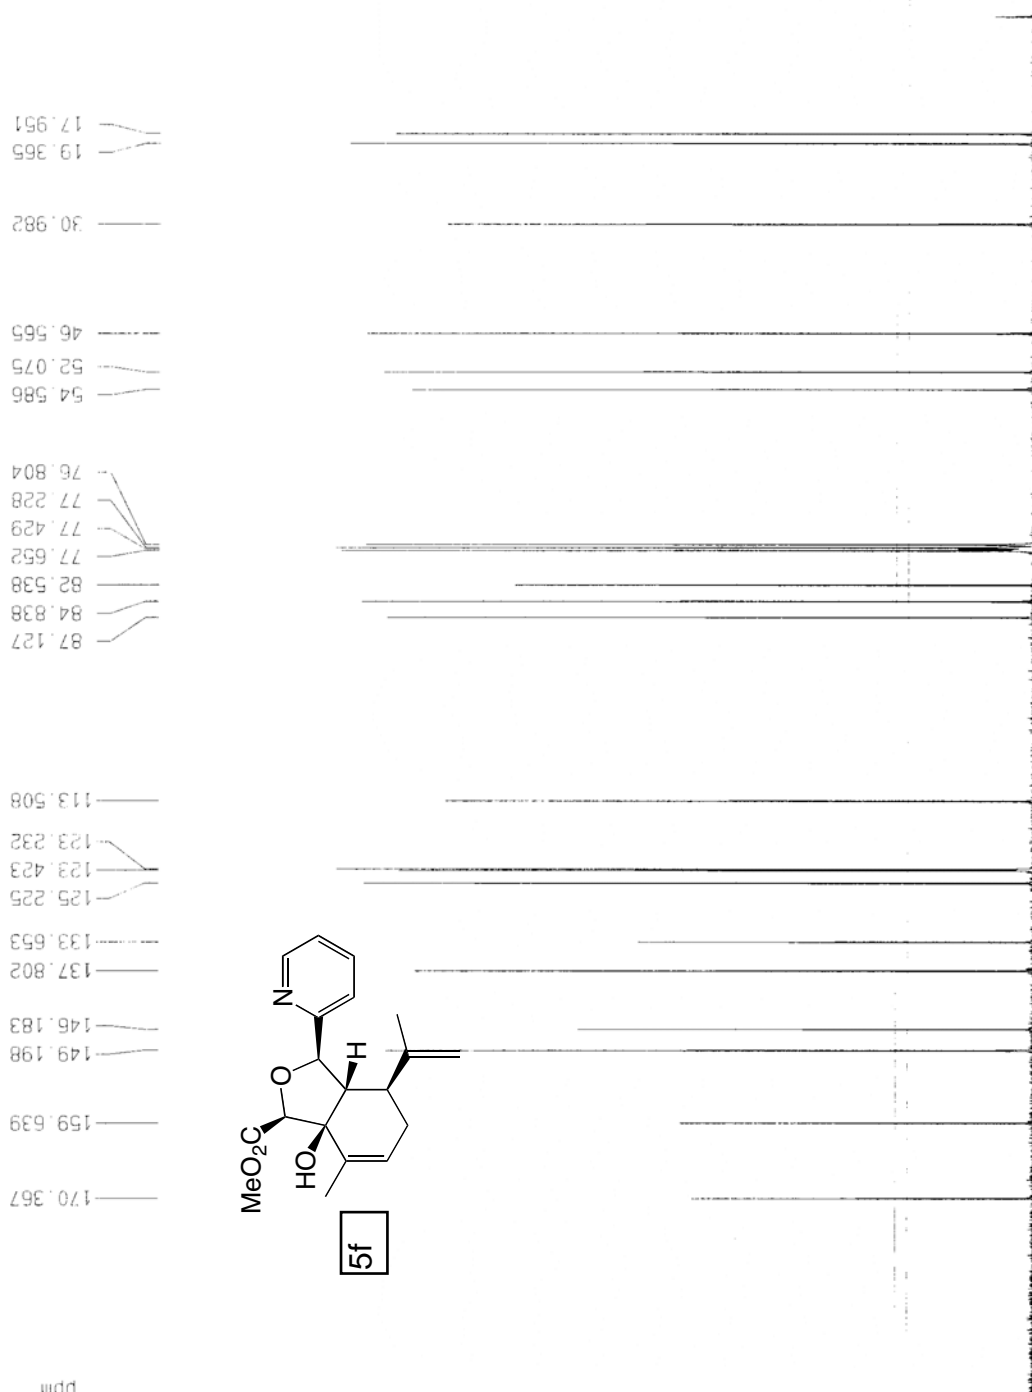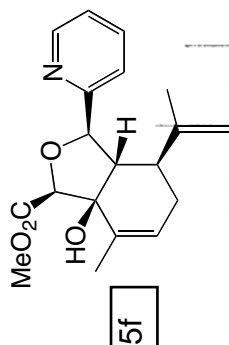

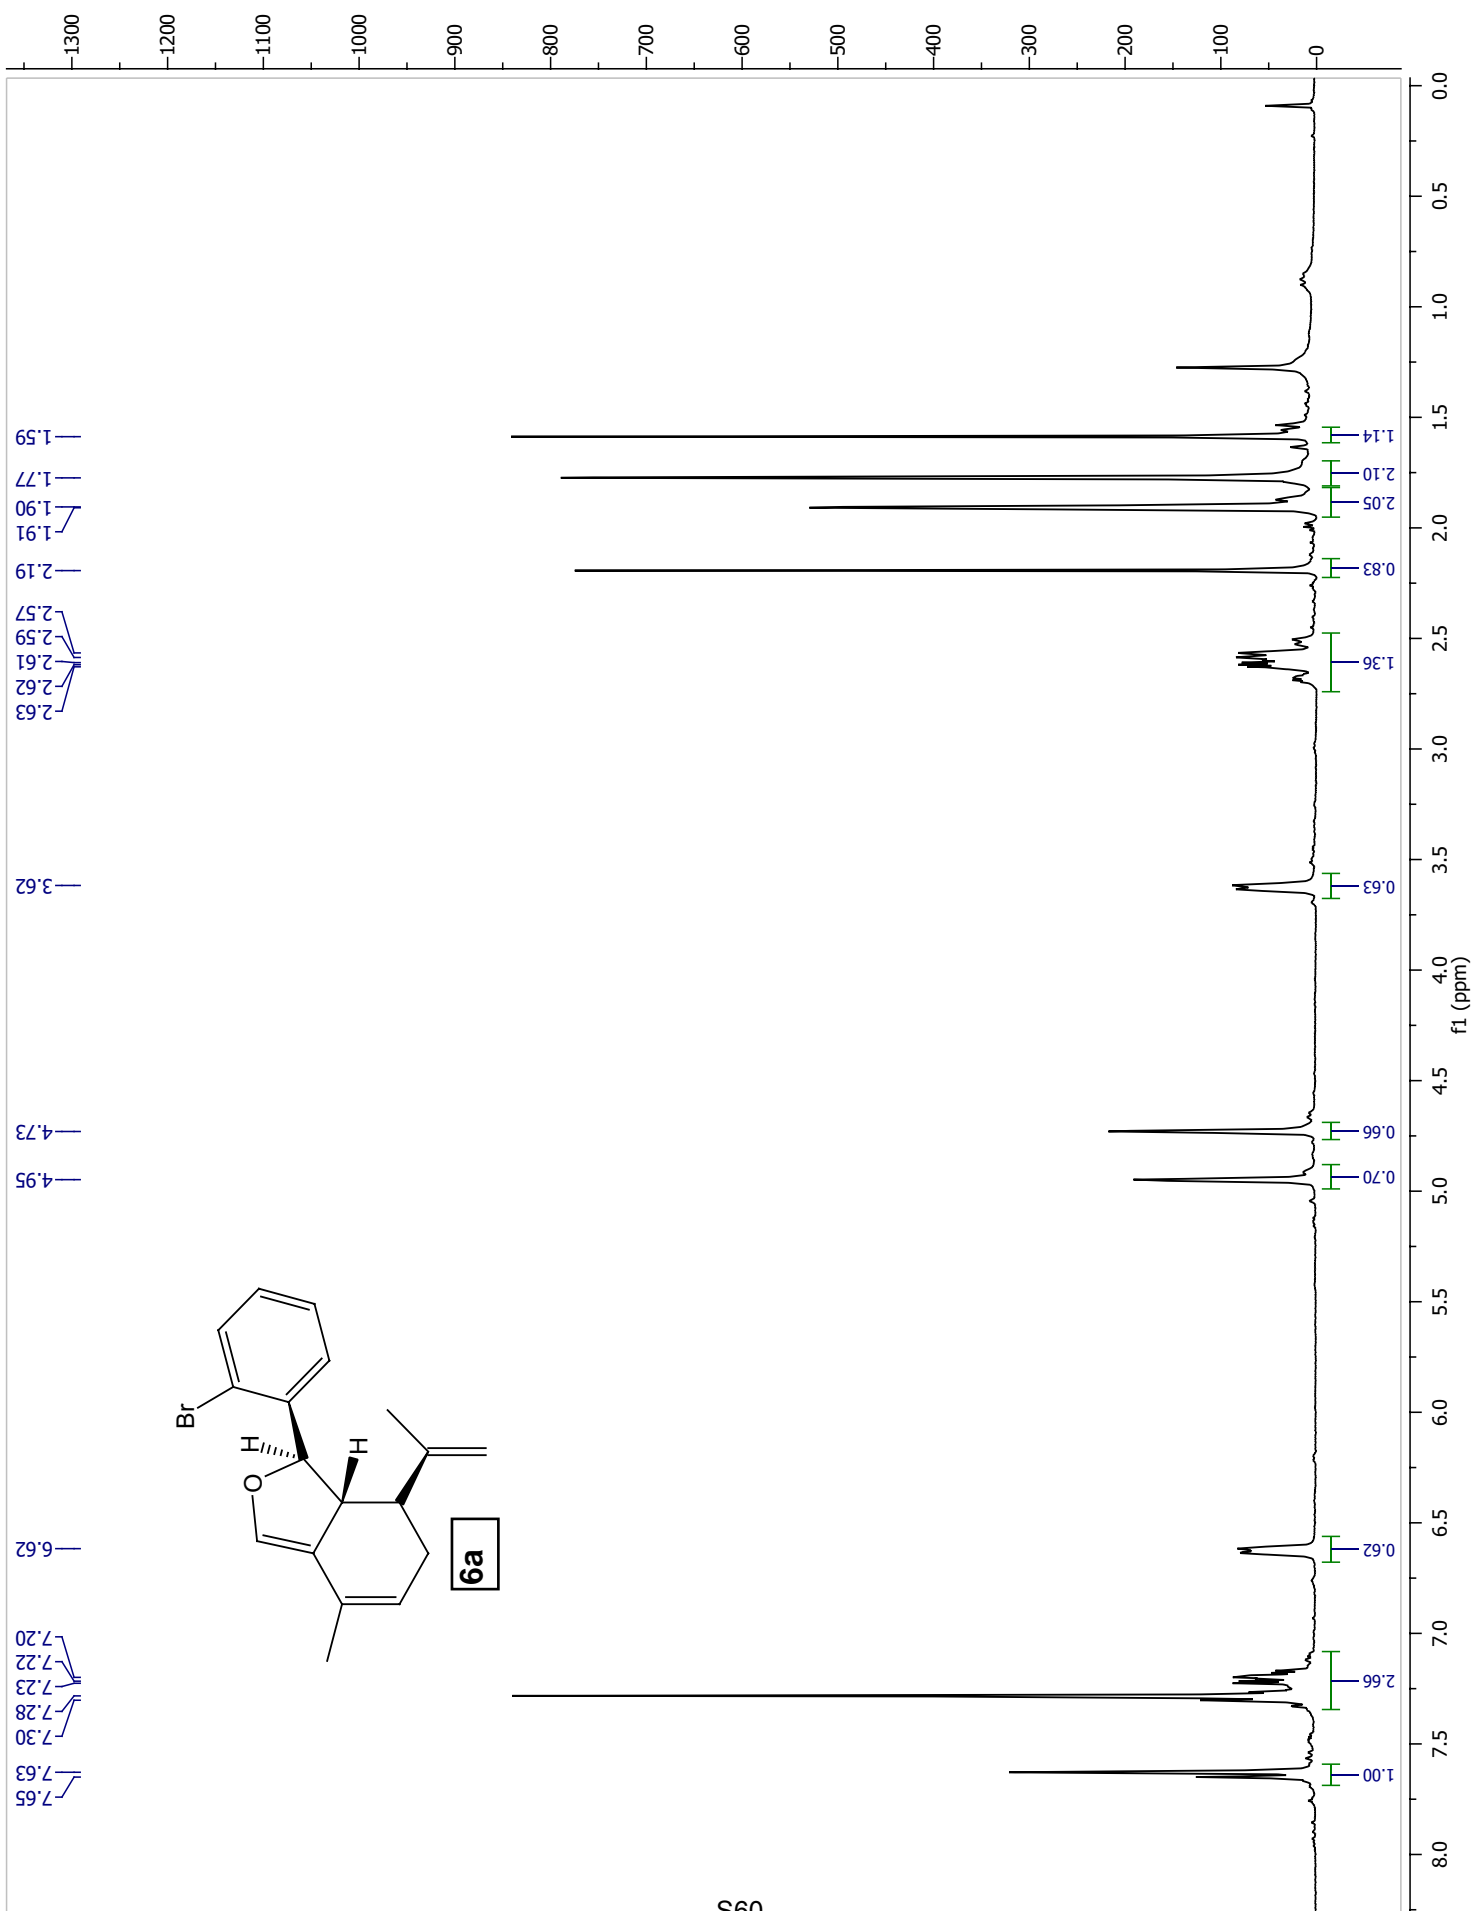

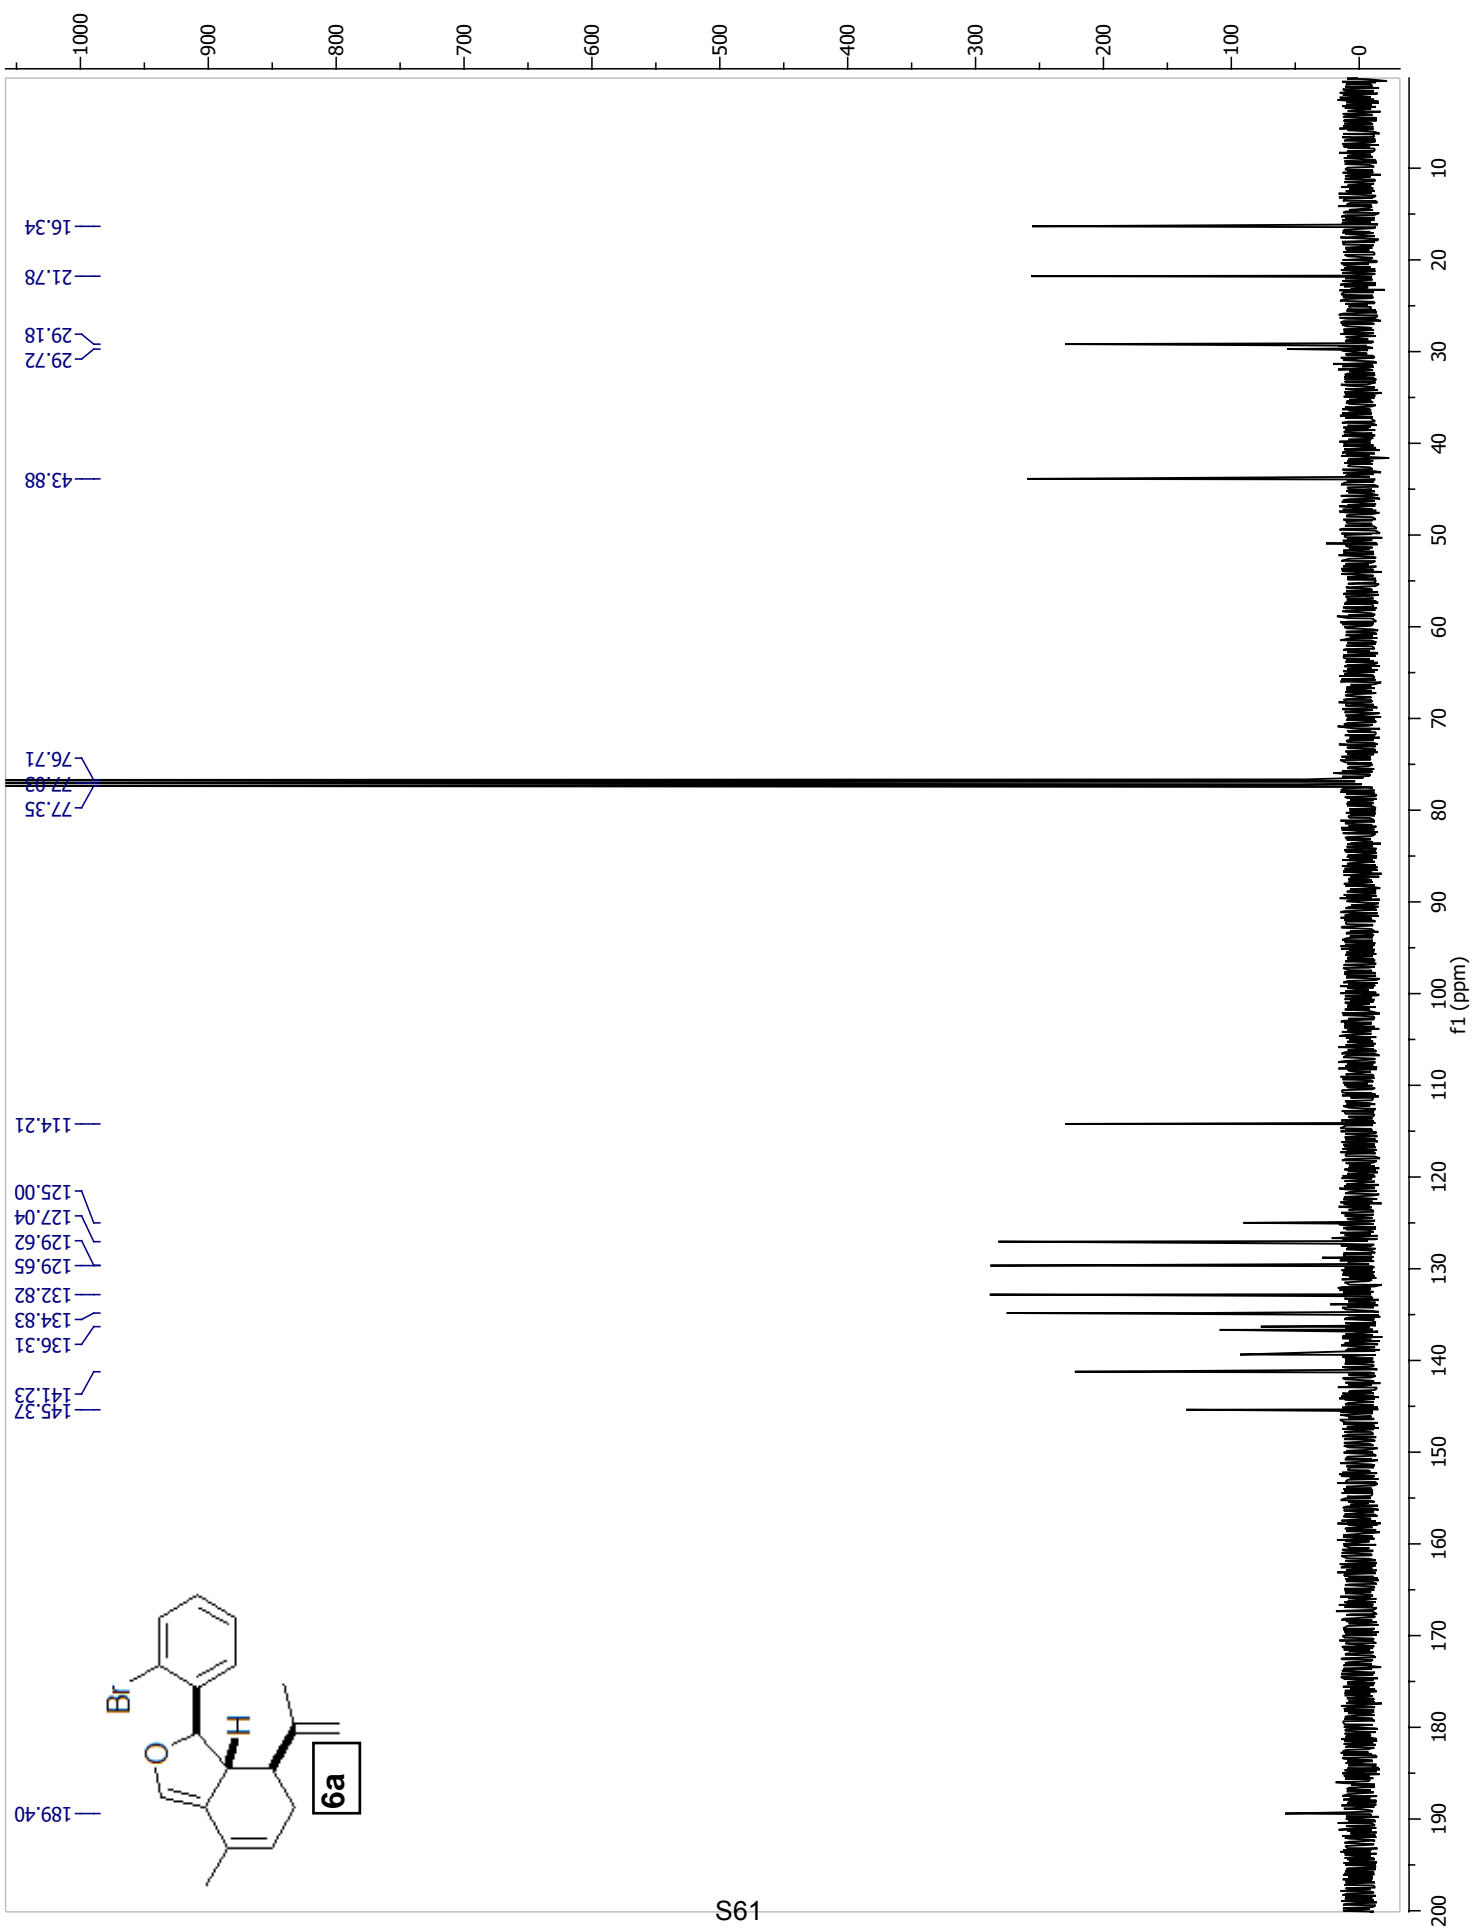

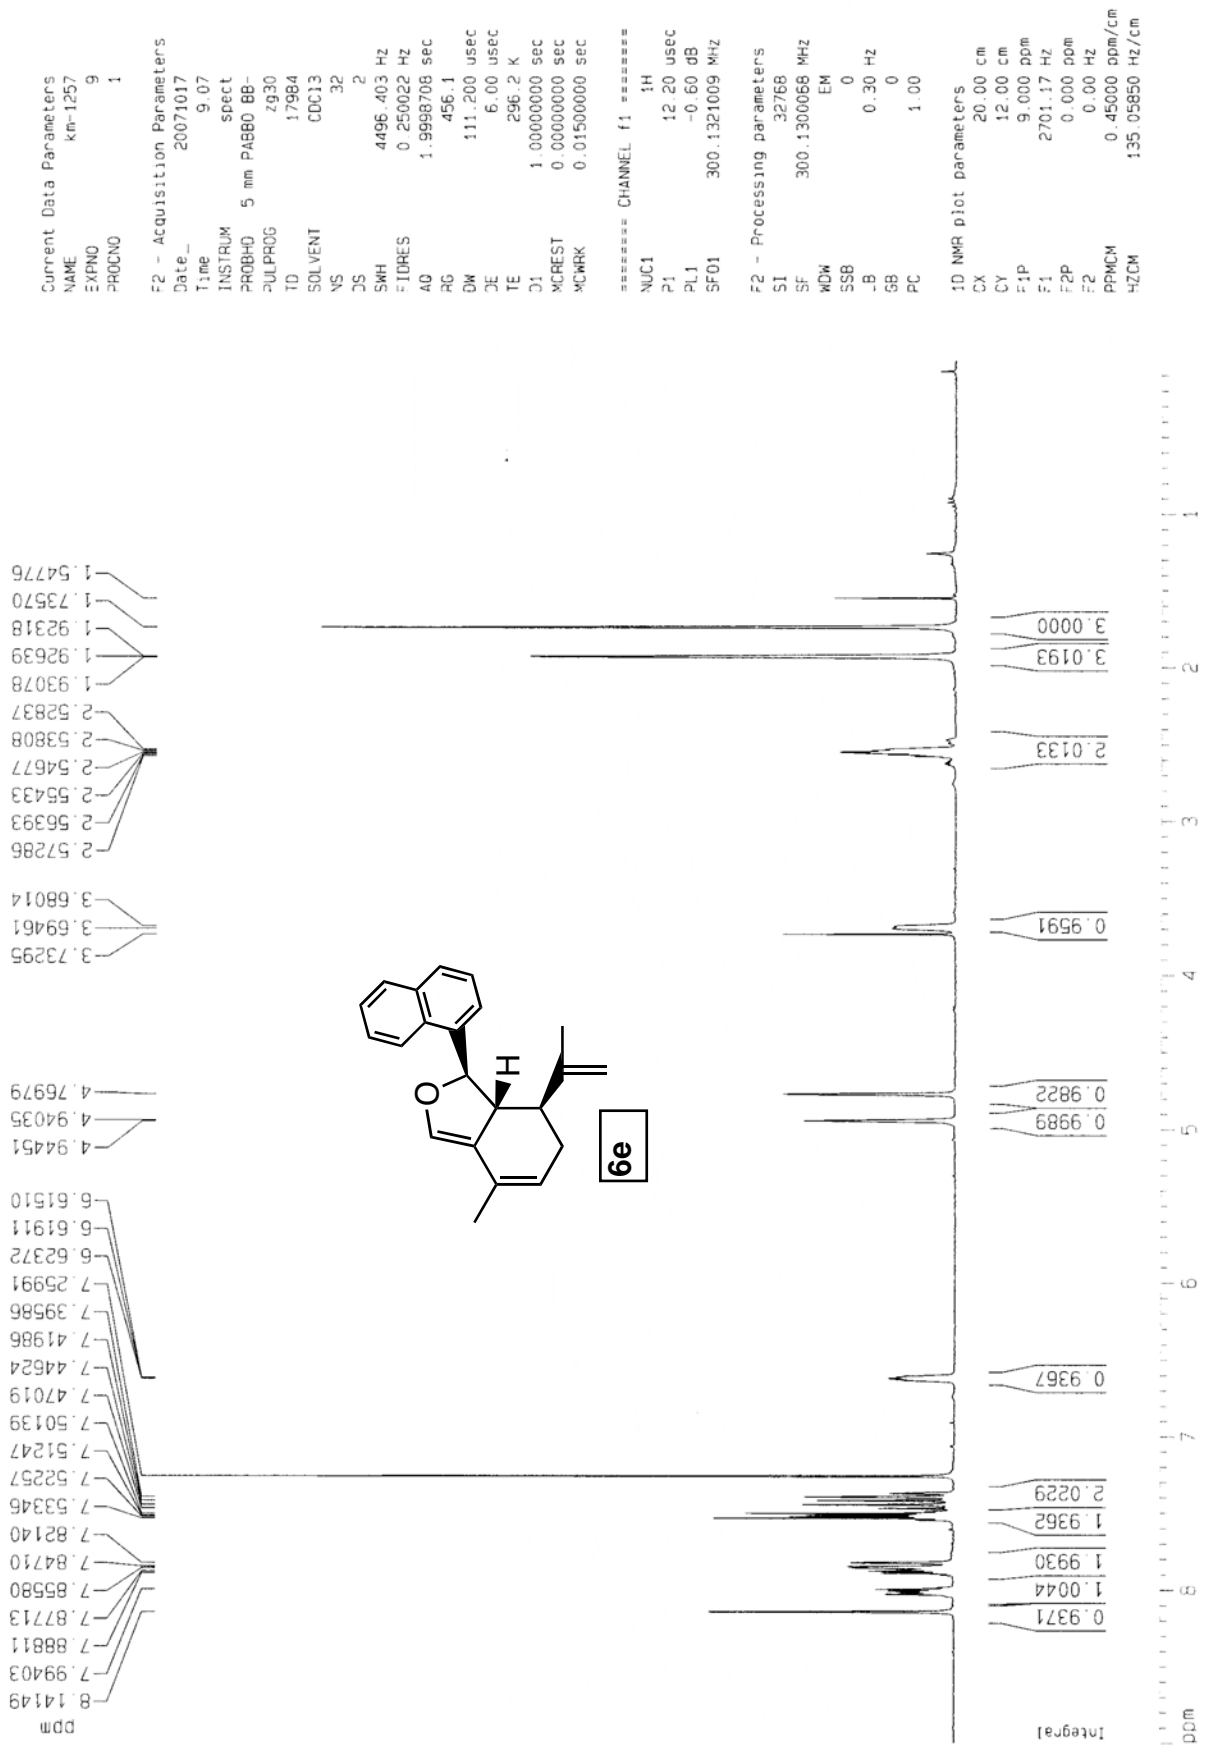

Current Data Parameters  
 NAME km-1257  
 EXPNO 8  
 PROCNO 1

F2 - Acquisition Parameters  
 Date\_ 20071021  
 Time 11:27  
 INSTRUM spect  
 PROBHD 5 mm PABBO BB-  
 PULPROG zgpg30  
 TD 35968  
 SOLVENT CDCl3  
 VS 1024  
 DS 4  
 SWH 18115.941 Hz  
 FIDRES 0.503668 Hz  
 AQ 0.9927669 sec  
 RG 26008  
 DM 27.600 usec  
 DE 6.00 usec  
 TE 297.0 K  
 D1 2.00000000 sec  
 d11 0.03000000 sec  
 DELTA 1.89999998 sec  
 MCREST 0.00000000 sec  
 MCNMRK 0.01500000 sec

===== CHANNEL f1 =====  
 NUC1 13C  
 P1 8.38 usec  
 PL1 -2.80 dB  
 SF01 75.4752953 MHz

===== CHANNEL f2 =====  
 CPDPRG2 waltz16  
 NUC2 1H  
 PCPD2 80.00 usec  
 PL2 -0.60 dB  
 PL12 15.73 dB  
 PL13 16.00 dB  
 SF02 300.1312005 MHz

F2 - Processing parameters  
 SI 32768  
 SF 75.4677337 MHz  
 WDW EM  
 SSB 0  
 LB 1.00 Hz  
 GB 0  
 GC 1.40

1D NMR plot parameters  
 CX 20.00 cm  
 CY 8.00 cm  
 ZP 220.221 ppm  
 F1 16619.54  
 F2 -0.000 ppm  
 F2 11.01103 ppm/cm  
 ZPCMH 830.97717 Hz/cm  
 AZCM

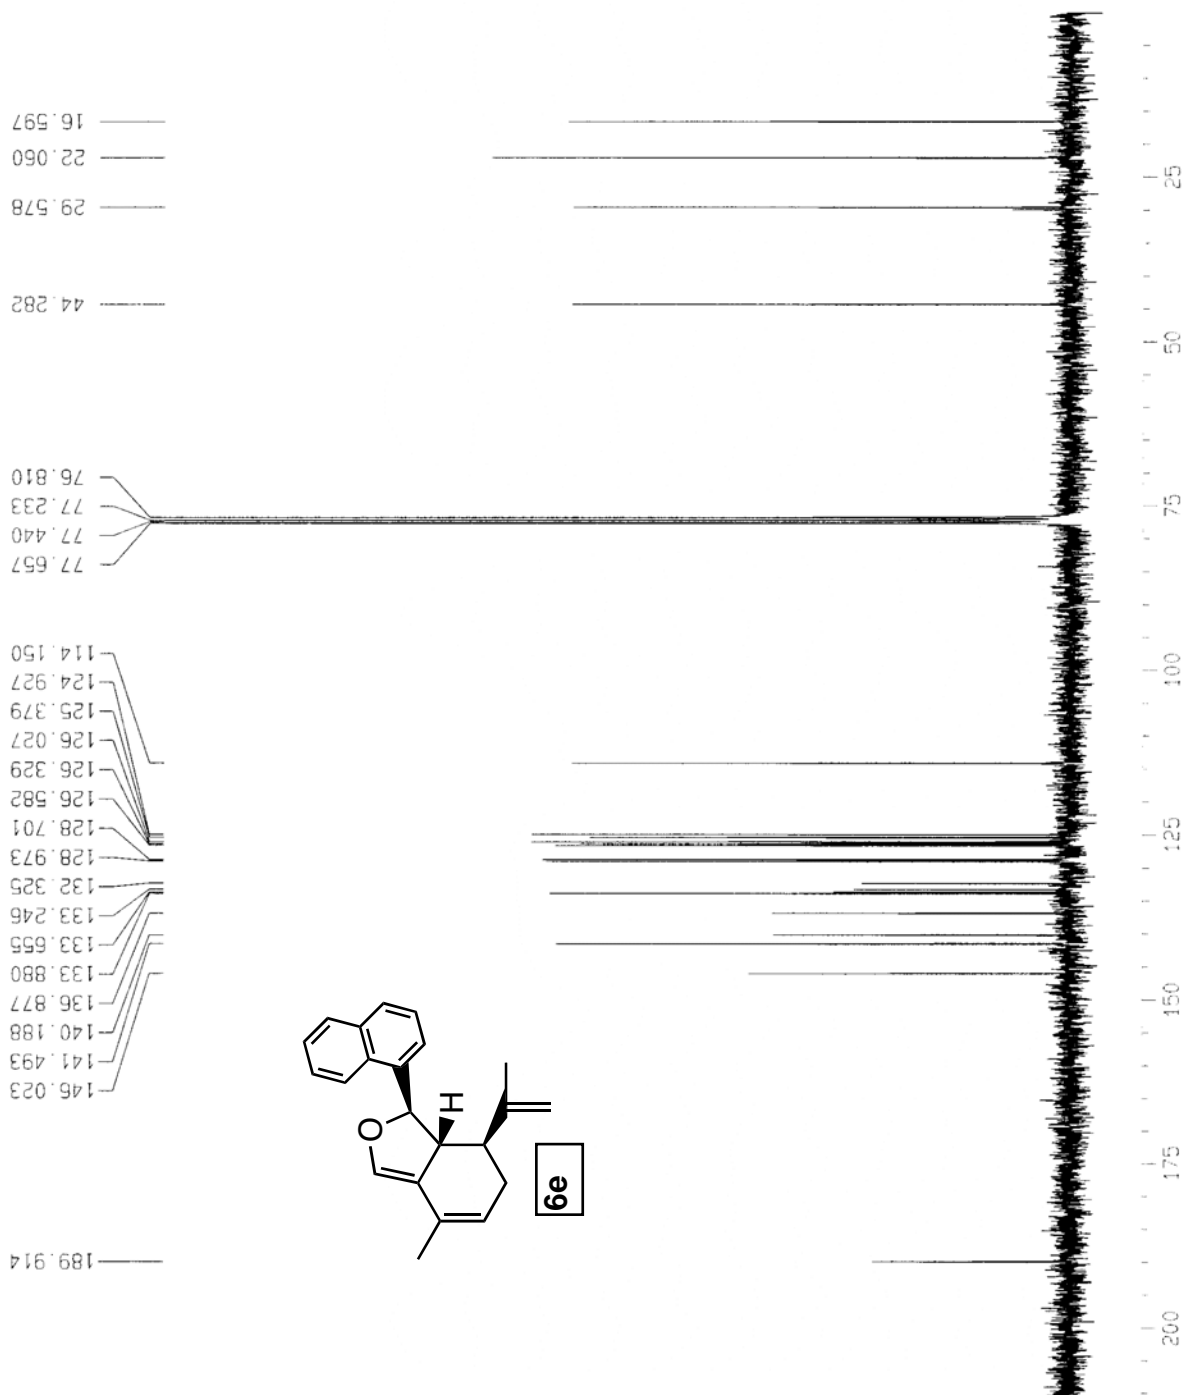

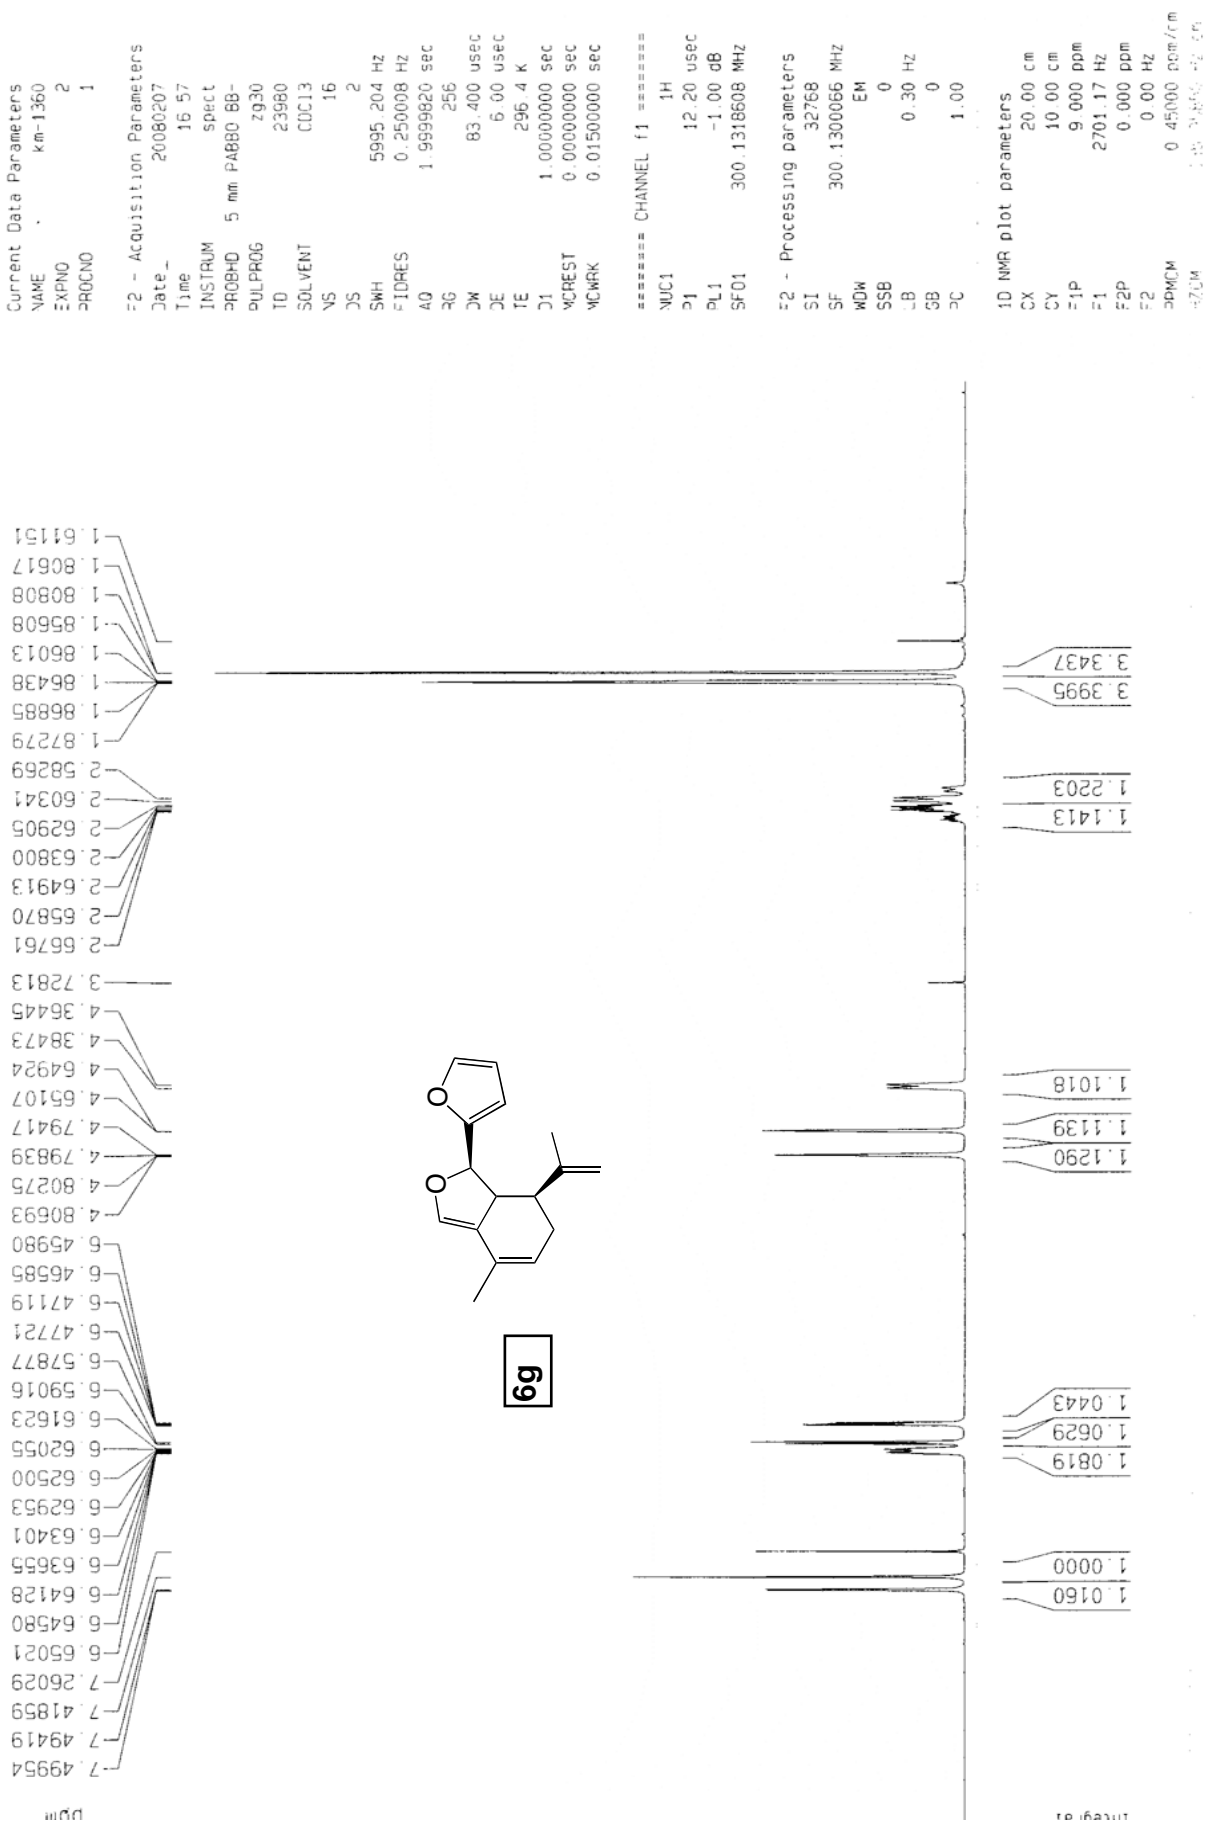

Current Data Parameters  
NAME km-1360  
EXPNO 2  
PROCNO 1

#2 - Acquisition Parameters  
Date\_ 20080210  
Time 15.10

INSTRUM spect  
PROBHD 5 mm PABBO BB-  
PULPROG zgpg30  
TD 36230  
SOLVENT CDCl3  
NS 4000  
DS 4

SWH 18115.941 Hz  
FIDRES 0.500026 Hz  
AQ 0.9999980 sec  
RG 23170.5  
DW 27.600 usec  
DE 6.00 usec  
TE 297.1 K

SI 2.00000000 sec  
d11 0.03000000 sec  
DELTA 1.89999998 sec  
MCREST 0.00000000 sec  
MCWRRK 0.01500000 sec

===== CHANNEL f1 =====  
NUC1 13C  
P1 8.38 usec  
PL1 -2.80 dB  
SF01 75.4752953 MHz

===== CHANNEL f2 =====  
CPOPRG2 waltz16  
NUC2 1H  
PCPD2 80.00 usec  
PL2 -1.00 dB  
PL12 15.33 dB  
PL13 16.00 dB  
SF02 300.1312005 MHz

#2 - Processing parameters  
SI 32768  
SF 75.4677337 MHz  
WDW EM  
SSB 0  
LB 1.00 Hz  
GB 0  
PC 1.40

1D NMR plot parameters  
CX 20.00 cm  
CY 10.00 cm  
F1p 220.221 ppm  
F1 16619.54 Hz  
F2p 0.000 ppm  
F2 0.00 Hz  
PPMCM 11.0103 ppm/cm  
HZCM 830.97723 Hz/cm

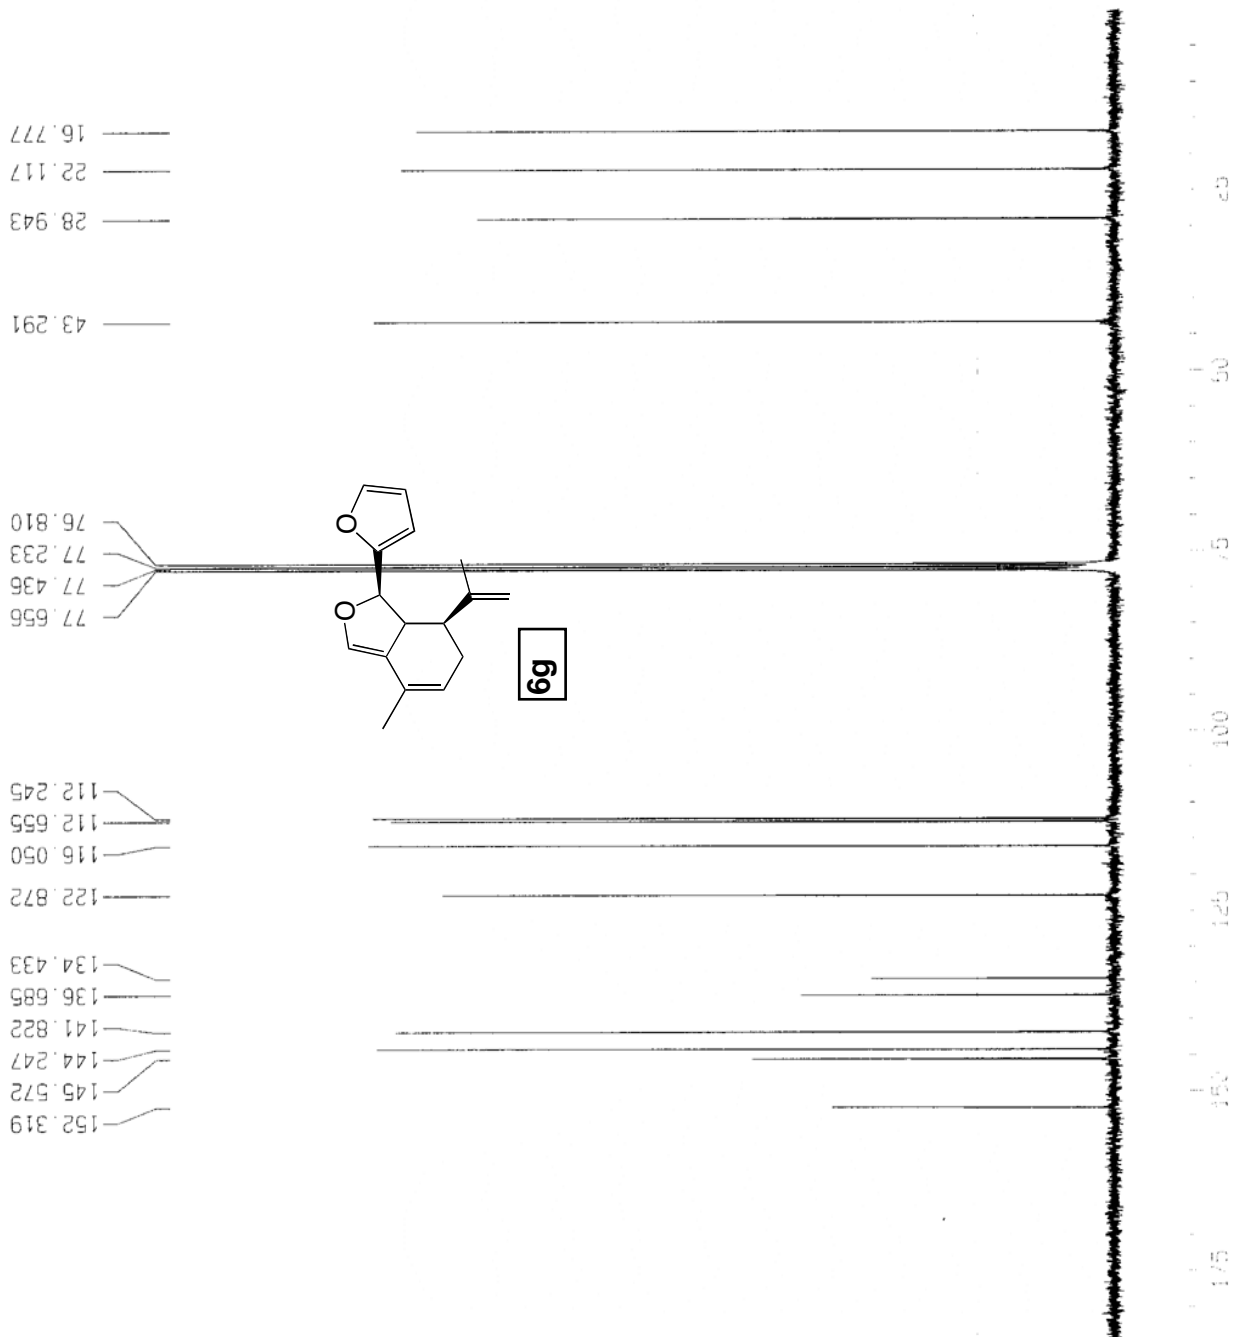

Current Data Parameters  
NAME km-1245  
EXPNO 2  
PROCNO 1

F2 - Acquisition Parameters  
Date\_ 20071006  
Time 10.17  
INSTRUM spect  
PROBHD 5 mm PABBO B8-  
PULPROG zg30  
TD 17984  
SOLVENT COC13  
NS 8  
DS 2  
SWH 4496.403 Hz  
FIDRES 0.250022 Hz  
AQ 1.9998708 sec  
RG 71.8  
DW 111.200 usec  
DE 6.00 usec  
TE 296.3 K  
D1 1.0000000 sec  
MCREST 0.0000000 sec  
MCWK 0.01500000 sec

===== CHANNEL f1 =====  
NUC1 1H  
P1 12.20 usec  
PL1 -0.60 dB  
SF01 300.1321009 MHz

F2 - Processing parameters  
SI 32768  
SF 300.1299555 MHz  
WDW EM  
SSB 0  
LB 0.30 Hz  
GB 0  
PC 1.00

1D NMR plot parameters  
CX 20.00 cm  
CY 11.00 cm  
F1P 9.000 ppm  
F1 2701.17 Hz  
F2P 0.000 ppm  
F2 0.00 Hz  
SFOCM 0.45000 ppm/cm  
HZCM 135.05850 Hz/cm

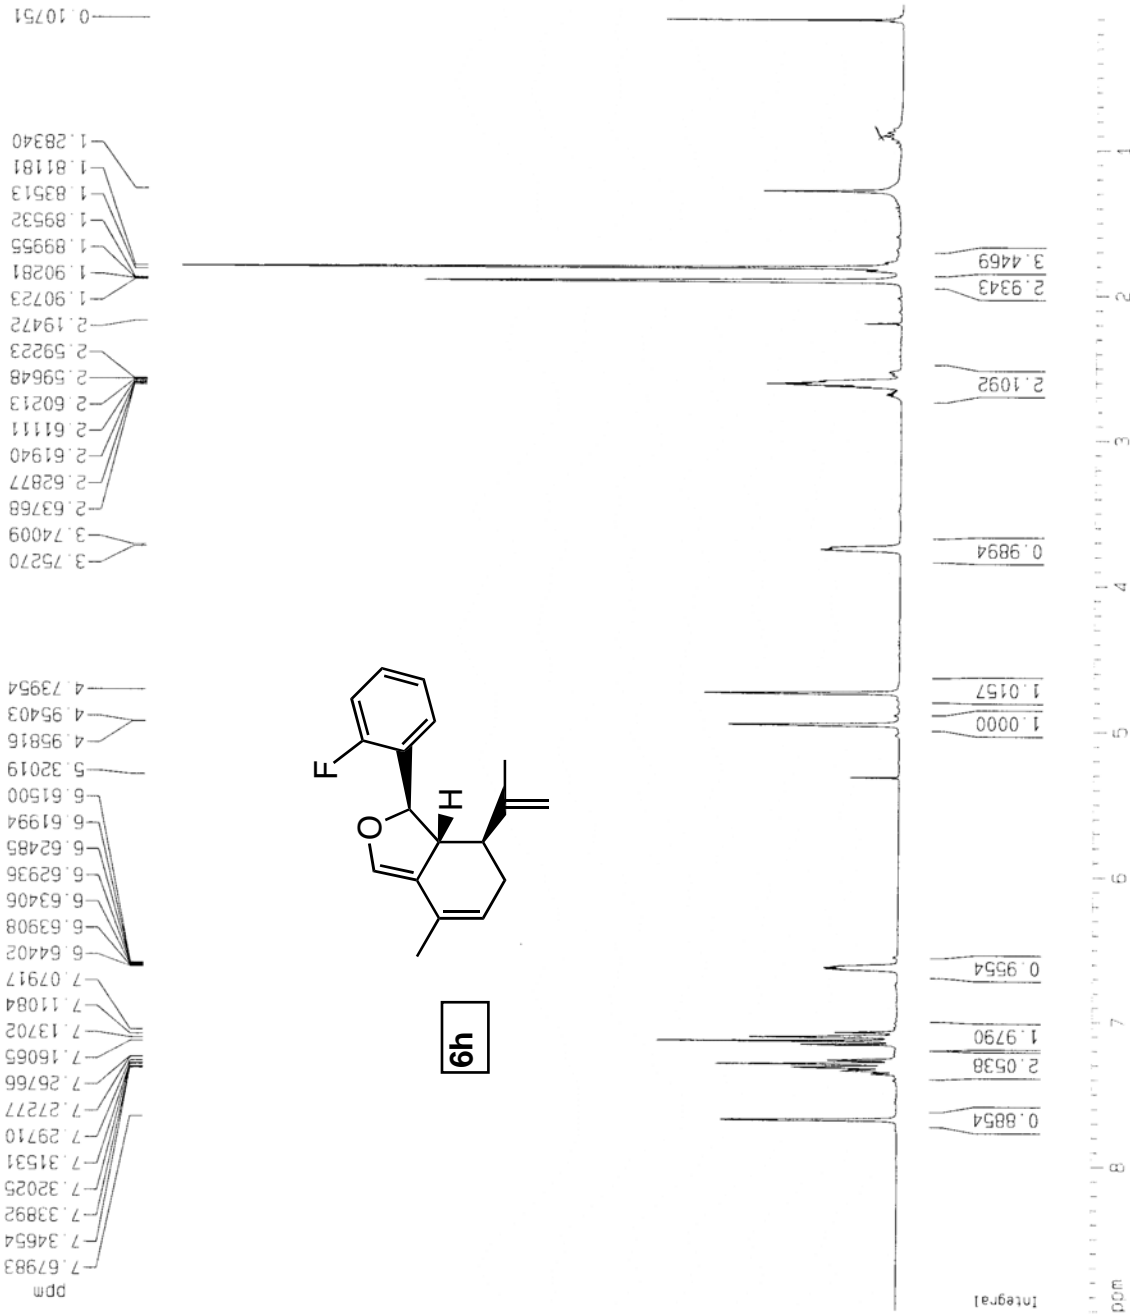

Current Data Parameters  
NAME km-1245  
EXPNO 5  
PROCNO 1

F2 - Acquisition Parameters  
Date\_ 20071005  
Time 10.19  
INSTRUM spect  
PROBHD 5 mm PABBO BB-  
PULPROG zgpg30  
TD 32372  
SOLVENT CDCl3  
NS 240  
DS 4  
SWH 17985.611 Hz  
FIDRES 0.555592 Hz  
AQ 0.8999916 sec  
RG 23170.5  
JM 27.800 usec  
DE 6.00 usec  
TE 296.5 K  
D1 2.00000000 sec  
d11 0.03000000 sec  
DELTA 1.89999998 sec  
MCREST 0.00000000 sec  
MCWRR 0.01500000 sec

\*\*\*\*\* CHANNEL f1 \*\*\*\*\*  
NUC1 13C  
P1 8.38 usec  
PL1 -2.80 dB  
SF01 75.4752953 MHz

\*\*\*\*\* CHANNEL f2 \*\*\*\*\*  
CPDPRG2 waltz16  
NUC2 1H  
PCPD2 80.00 usec  
PL2 -0.60 dB  
PL12 15.73 dB  
PL13 16.00 dB  
SF02 300.1312005 MHz

F2 - Processing parameters  
SI 32768  
SF 75.4677363 MHz  
WDW EM  
SSB 0  
LB 1.00 Hz  
GB 0  
PC 1.40

1D NMR plot parameters  
CX 20.00 cm  
CY 10.00 cm  
F1P 200.000 ppm  
F1 15093.55 Hz  
F2P 0.000 ppm  
F2 0.00 Hz  
PPMCM 10.00000 ppm/cm  
HZCM 754.67737 Hz/cm

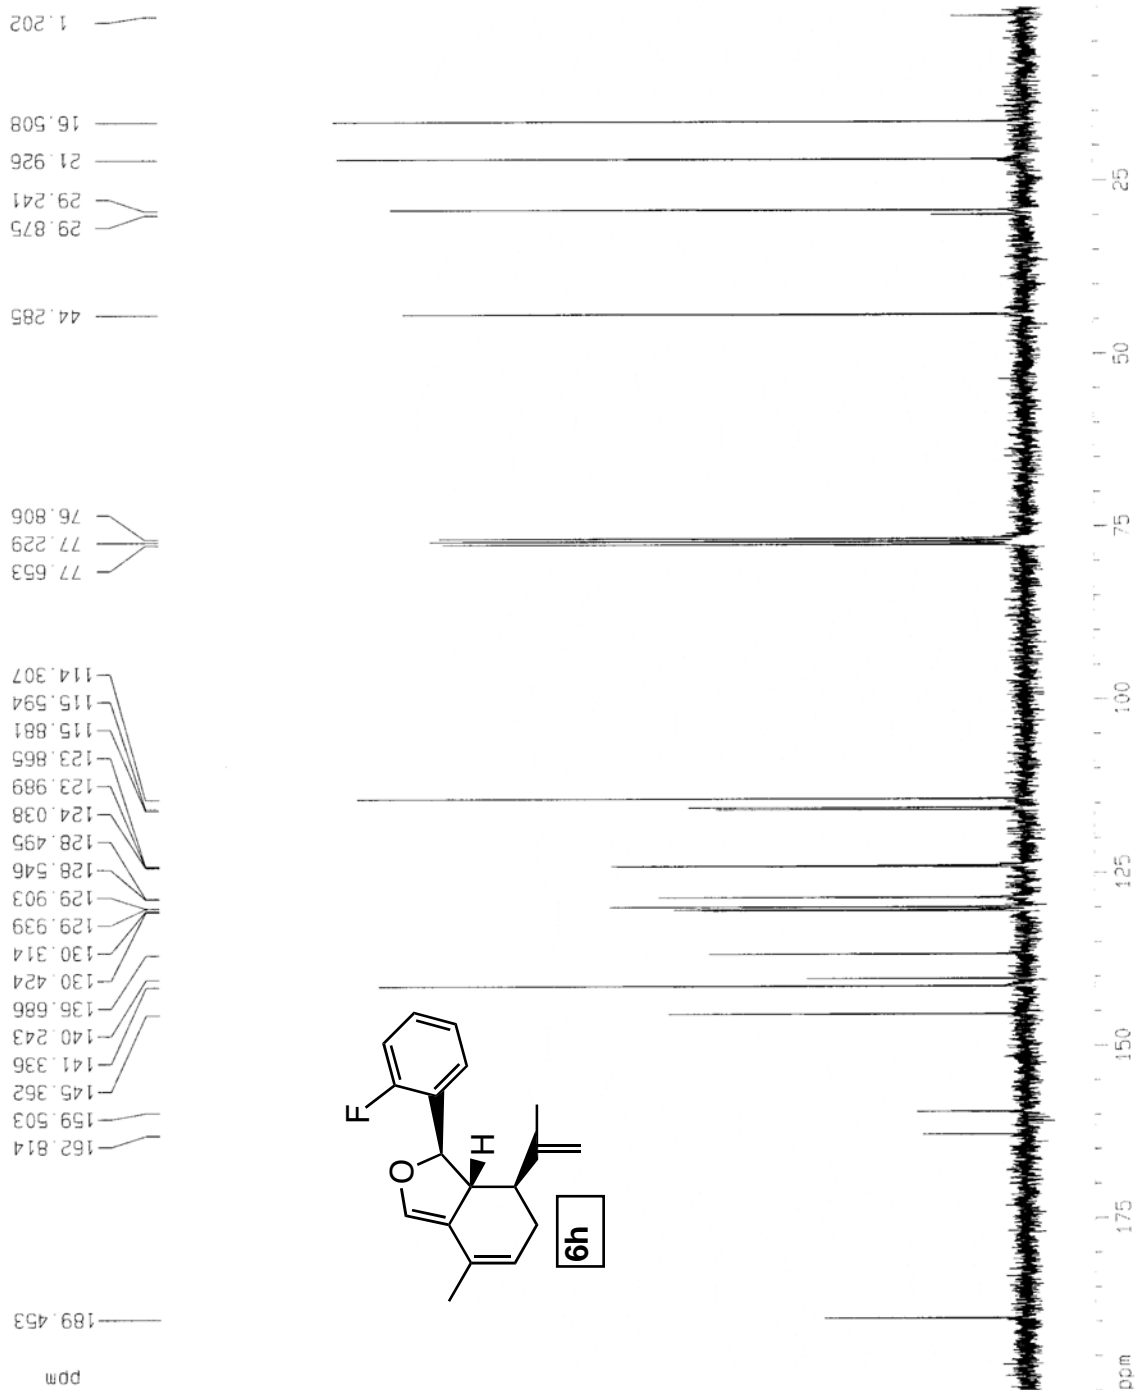

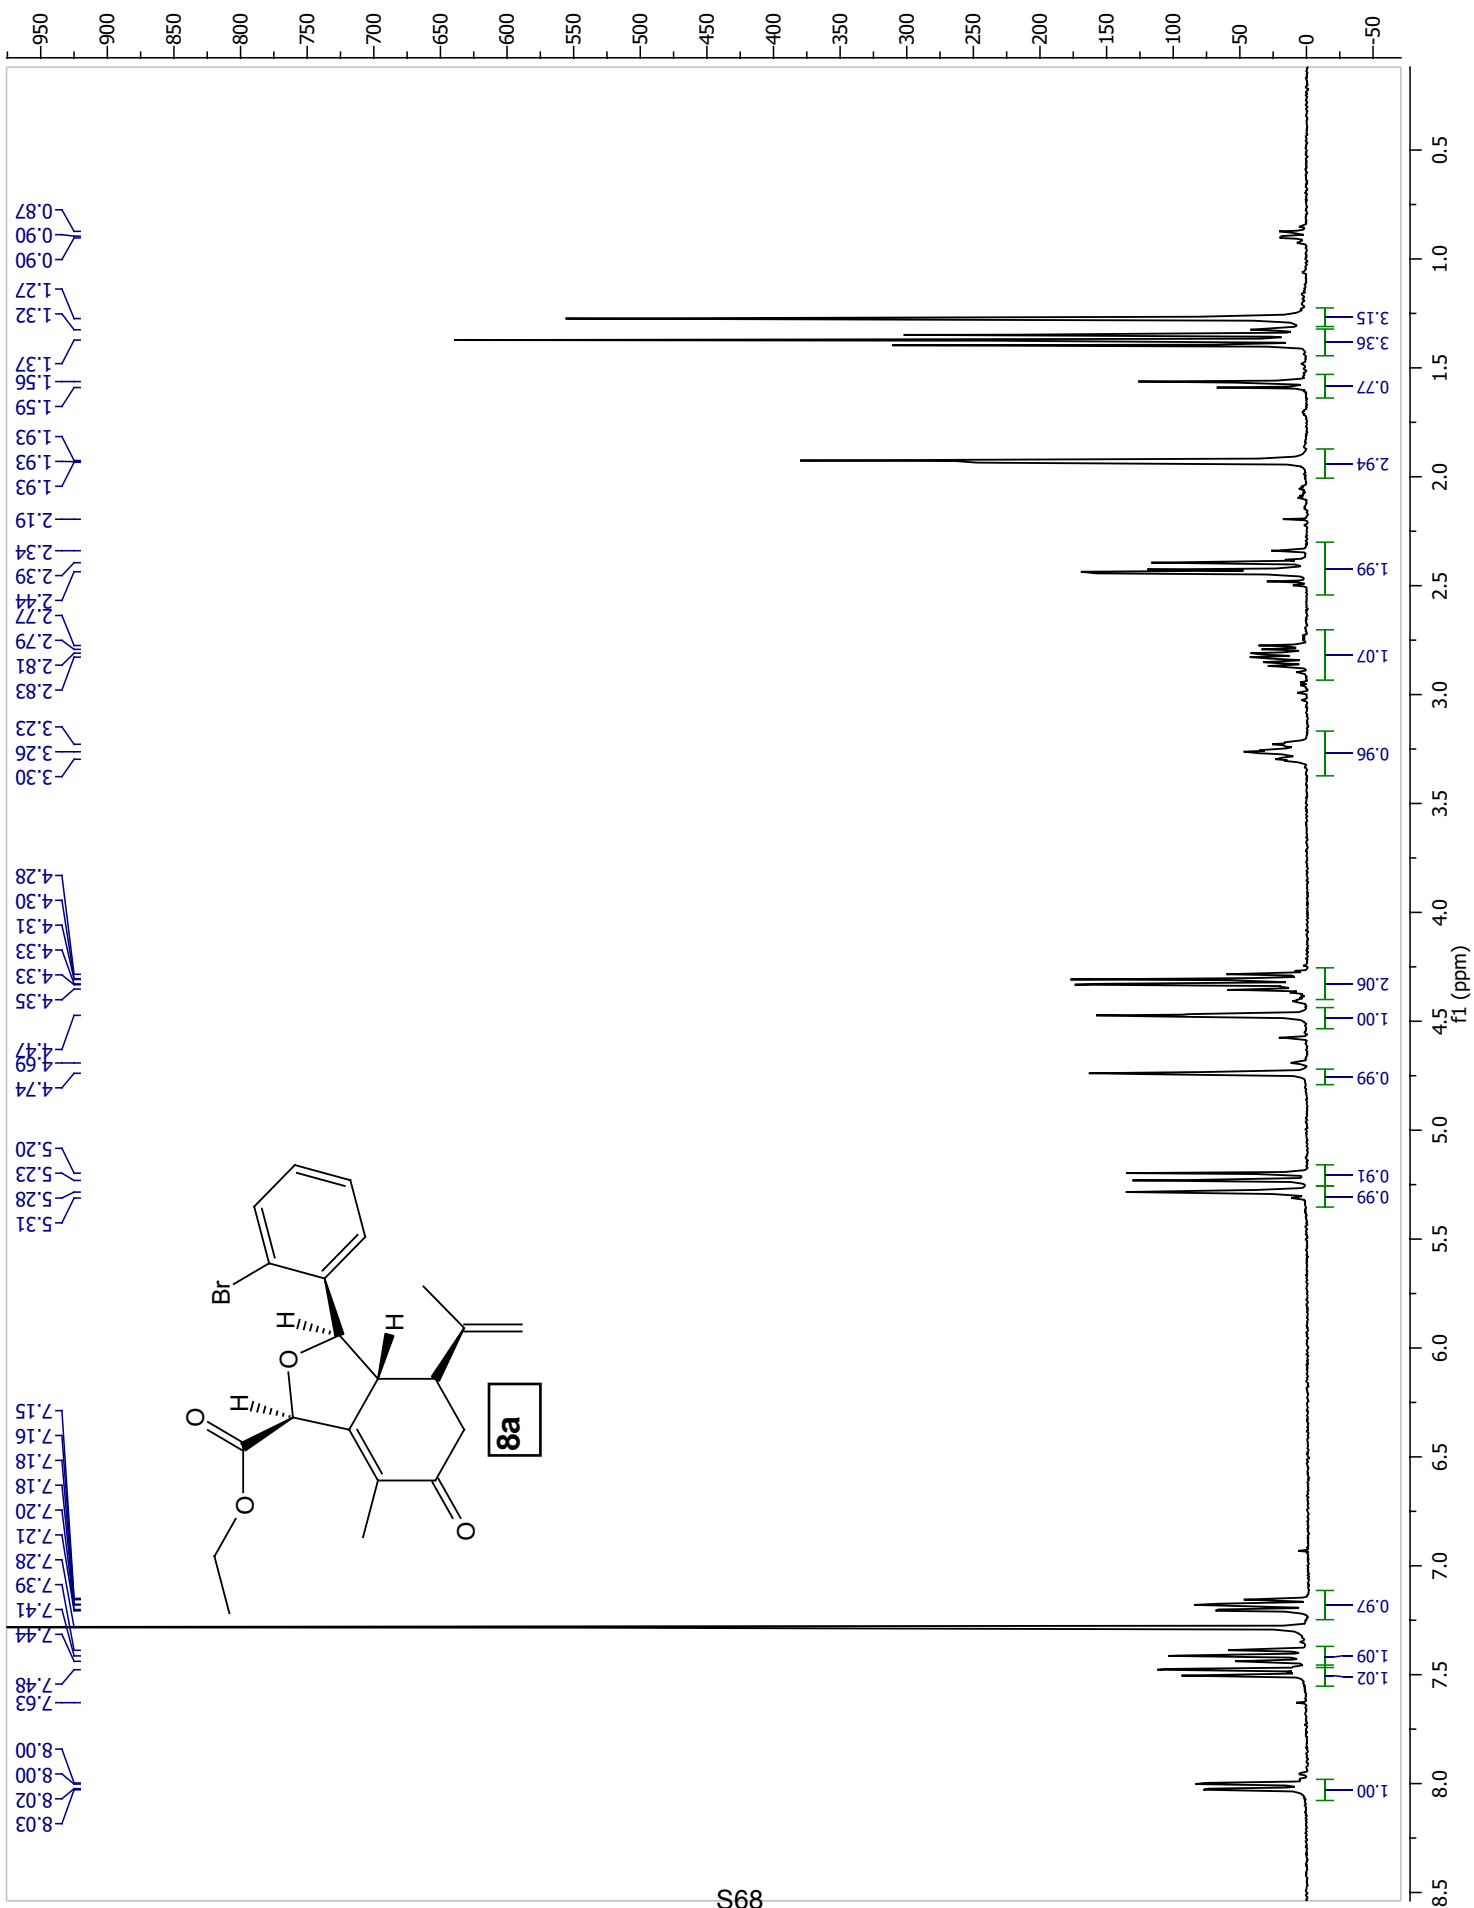

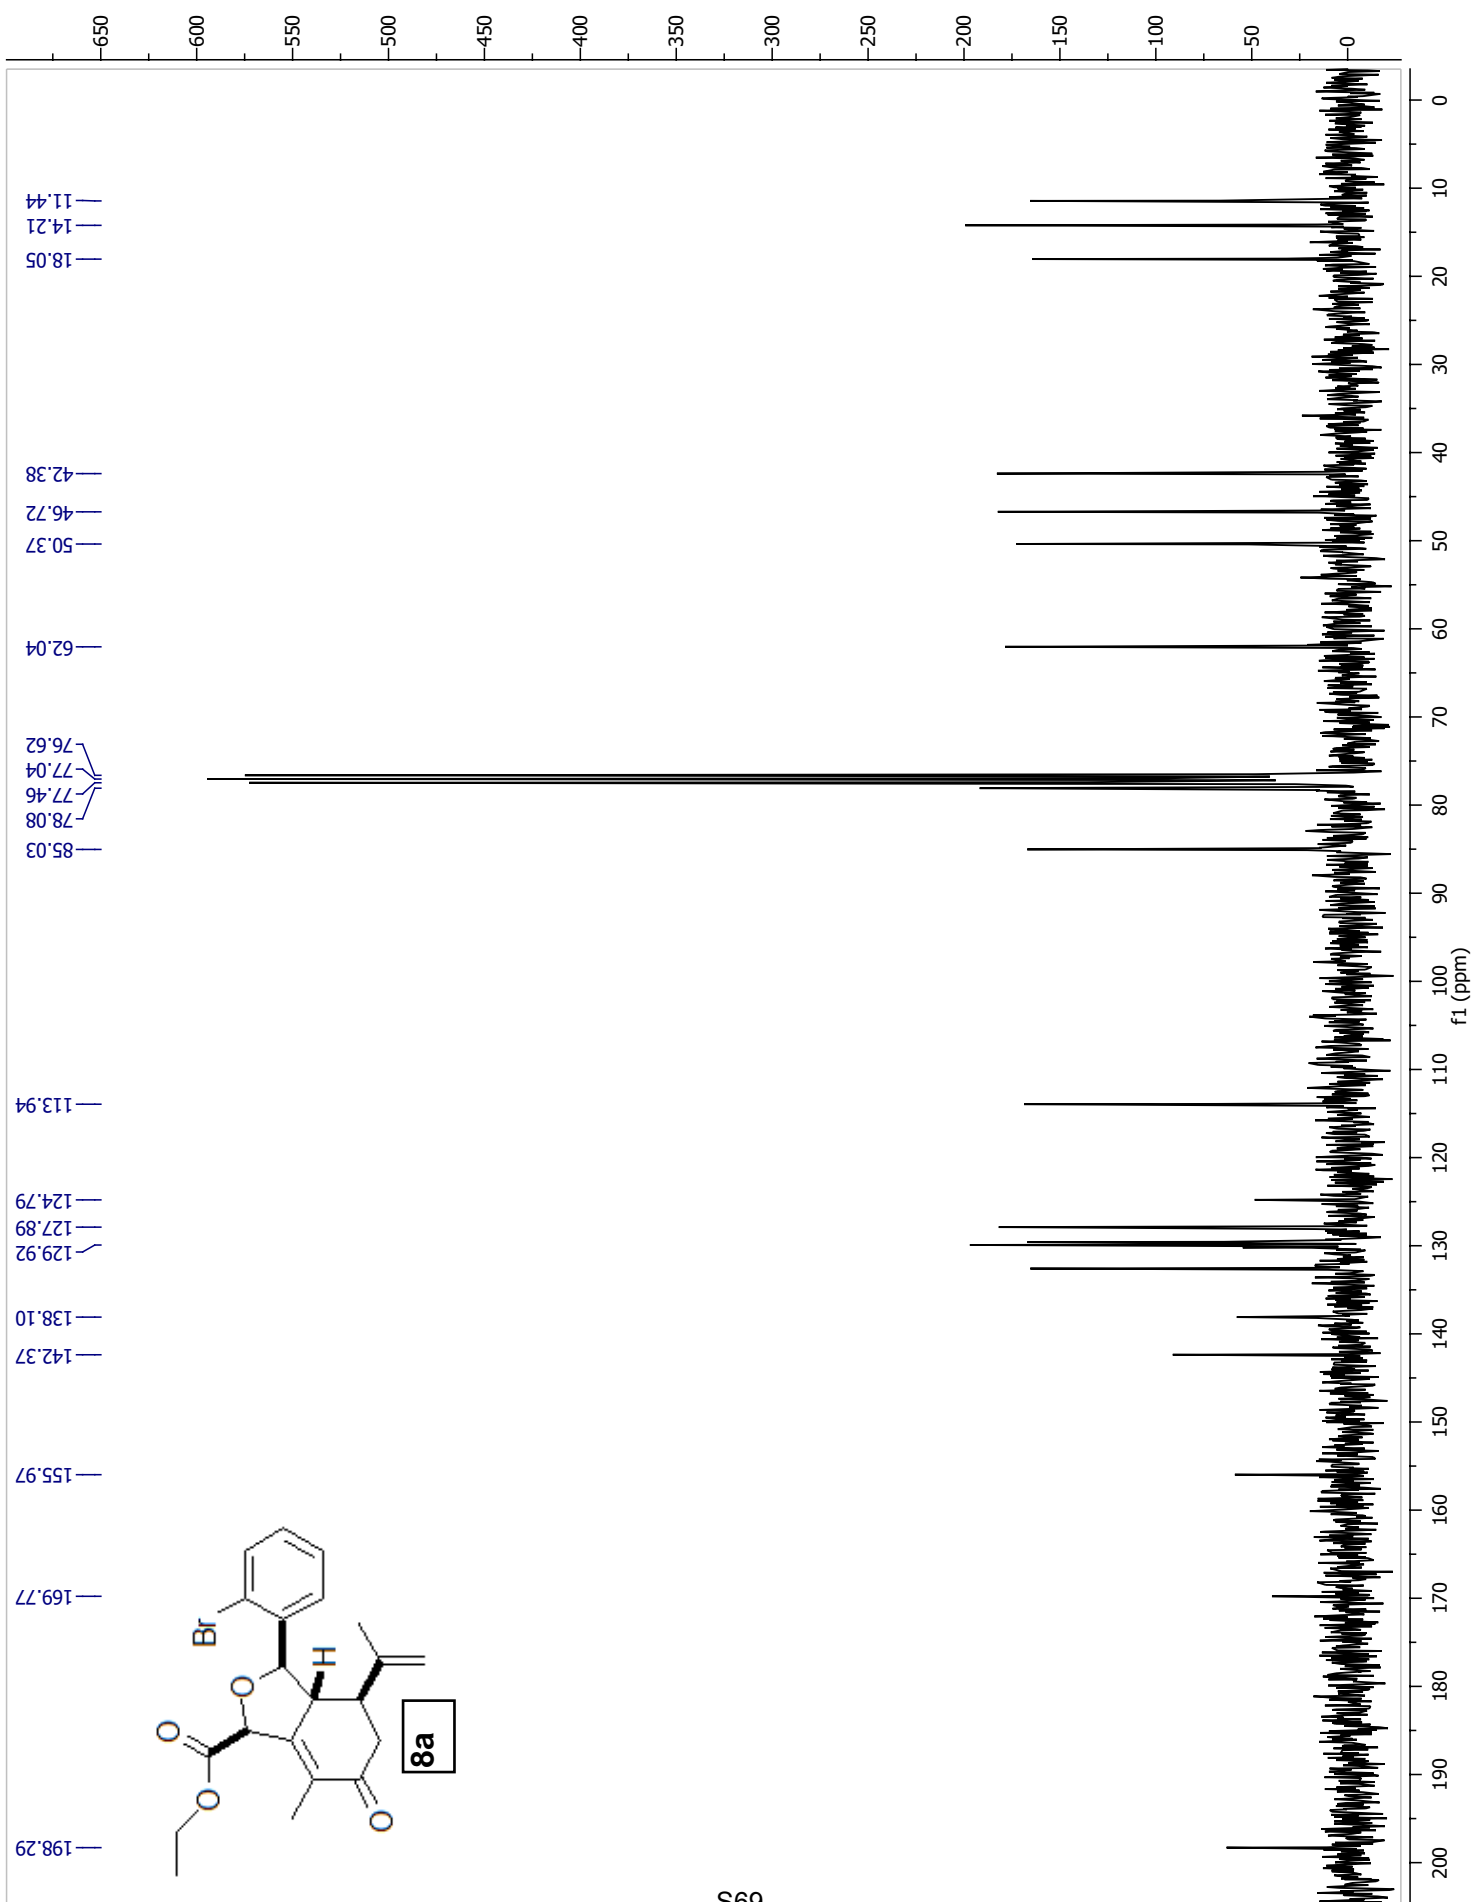

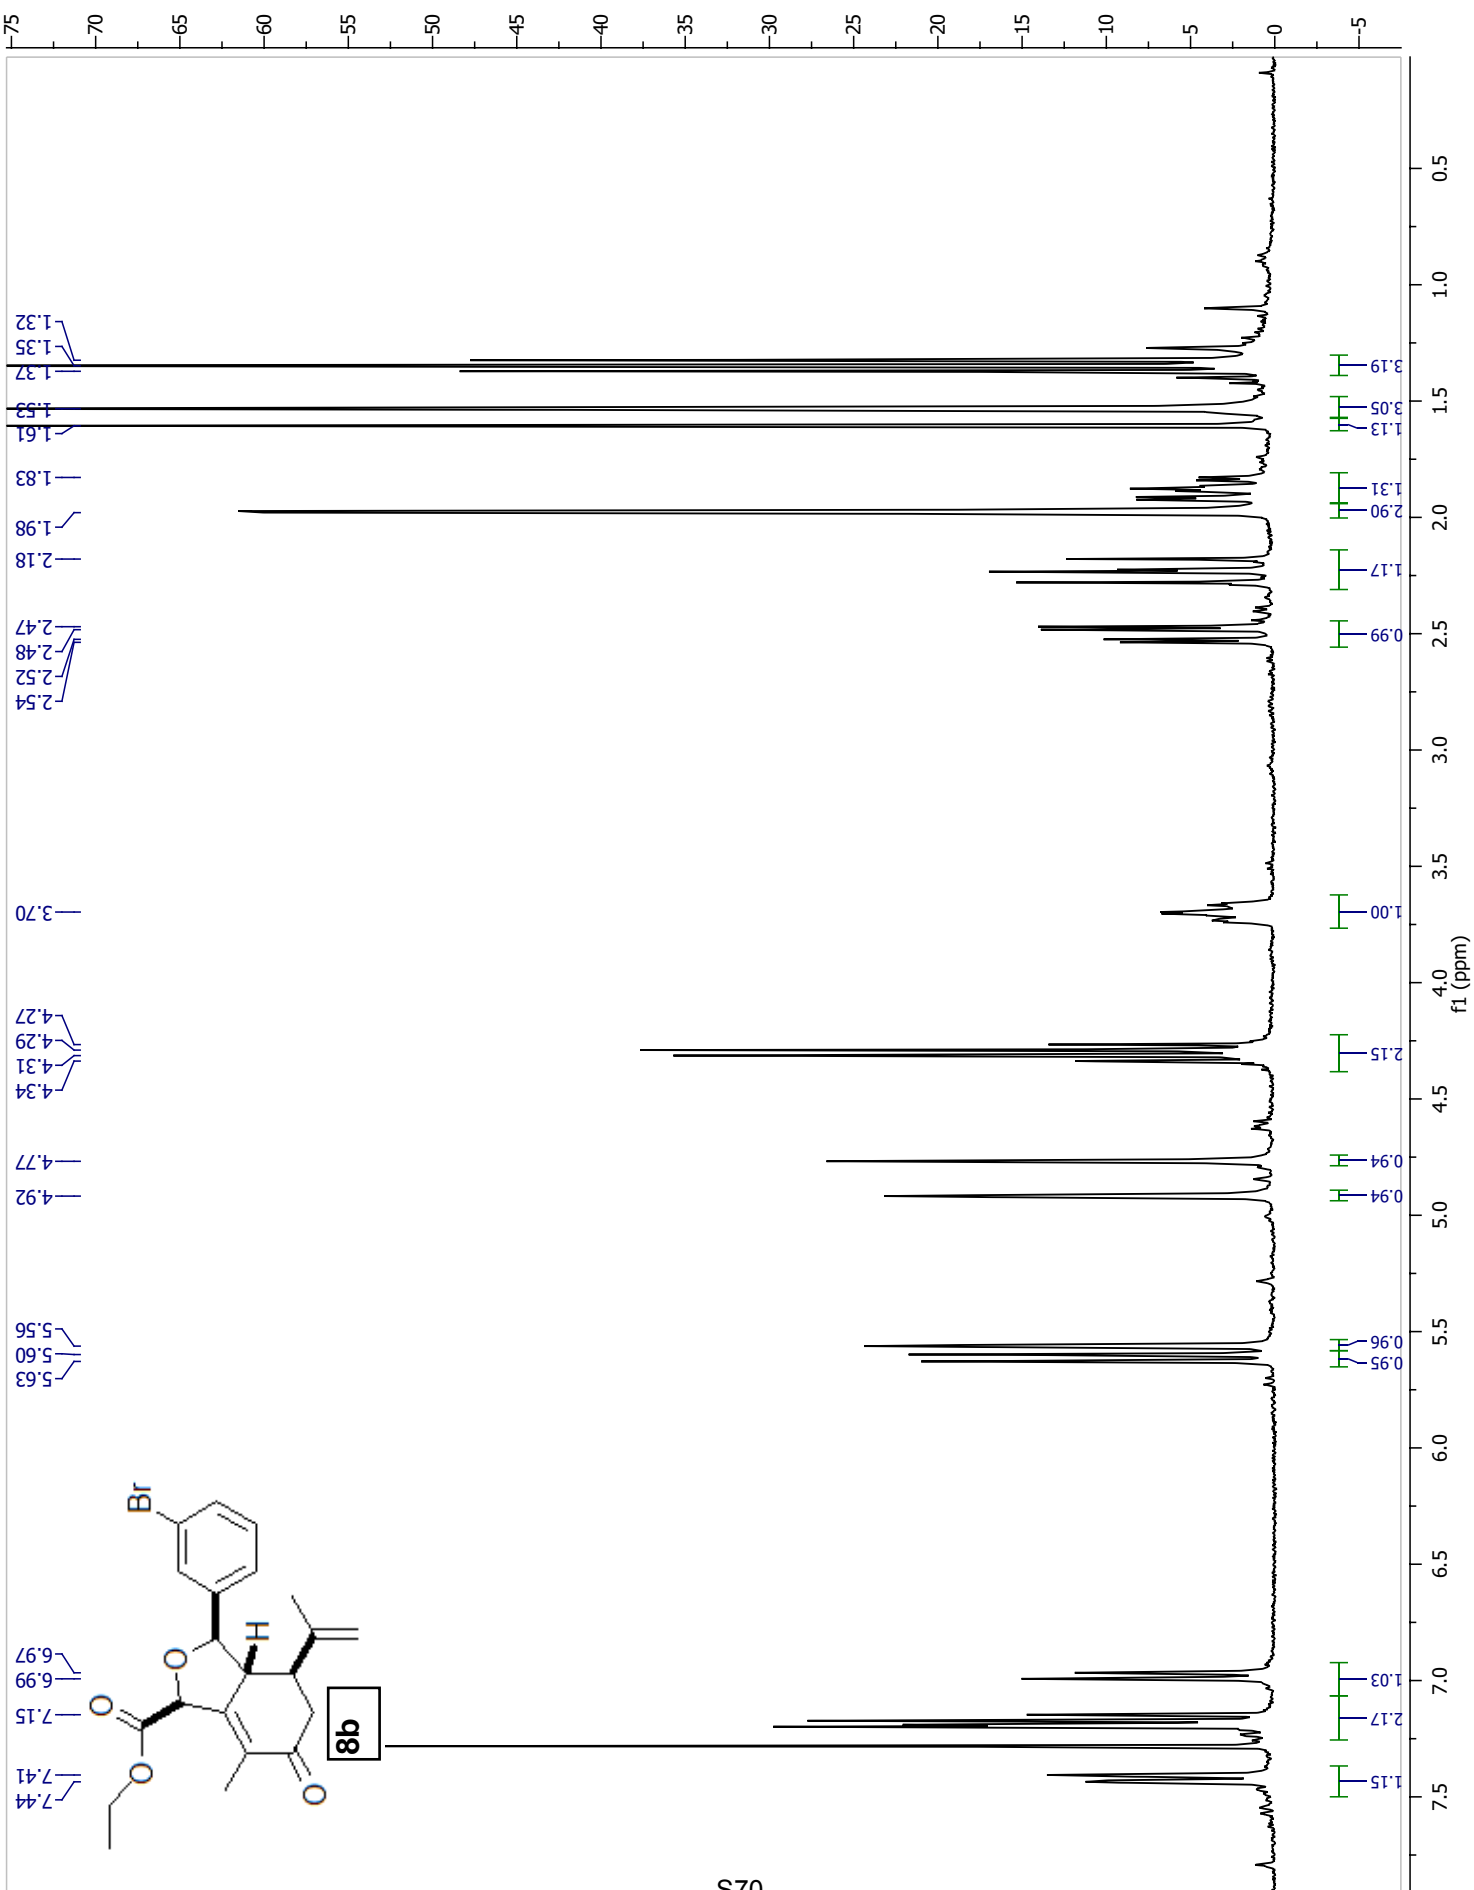

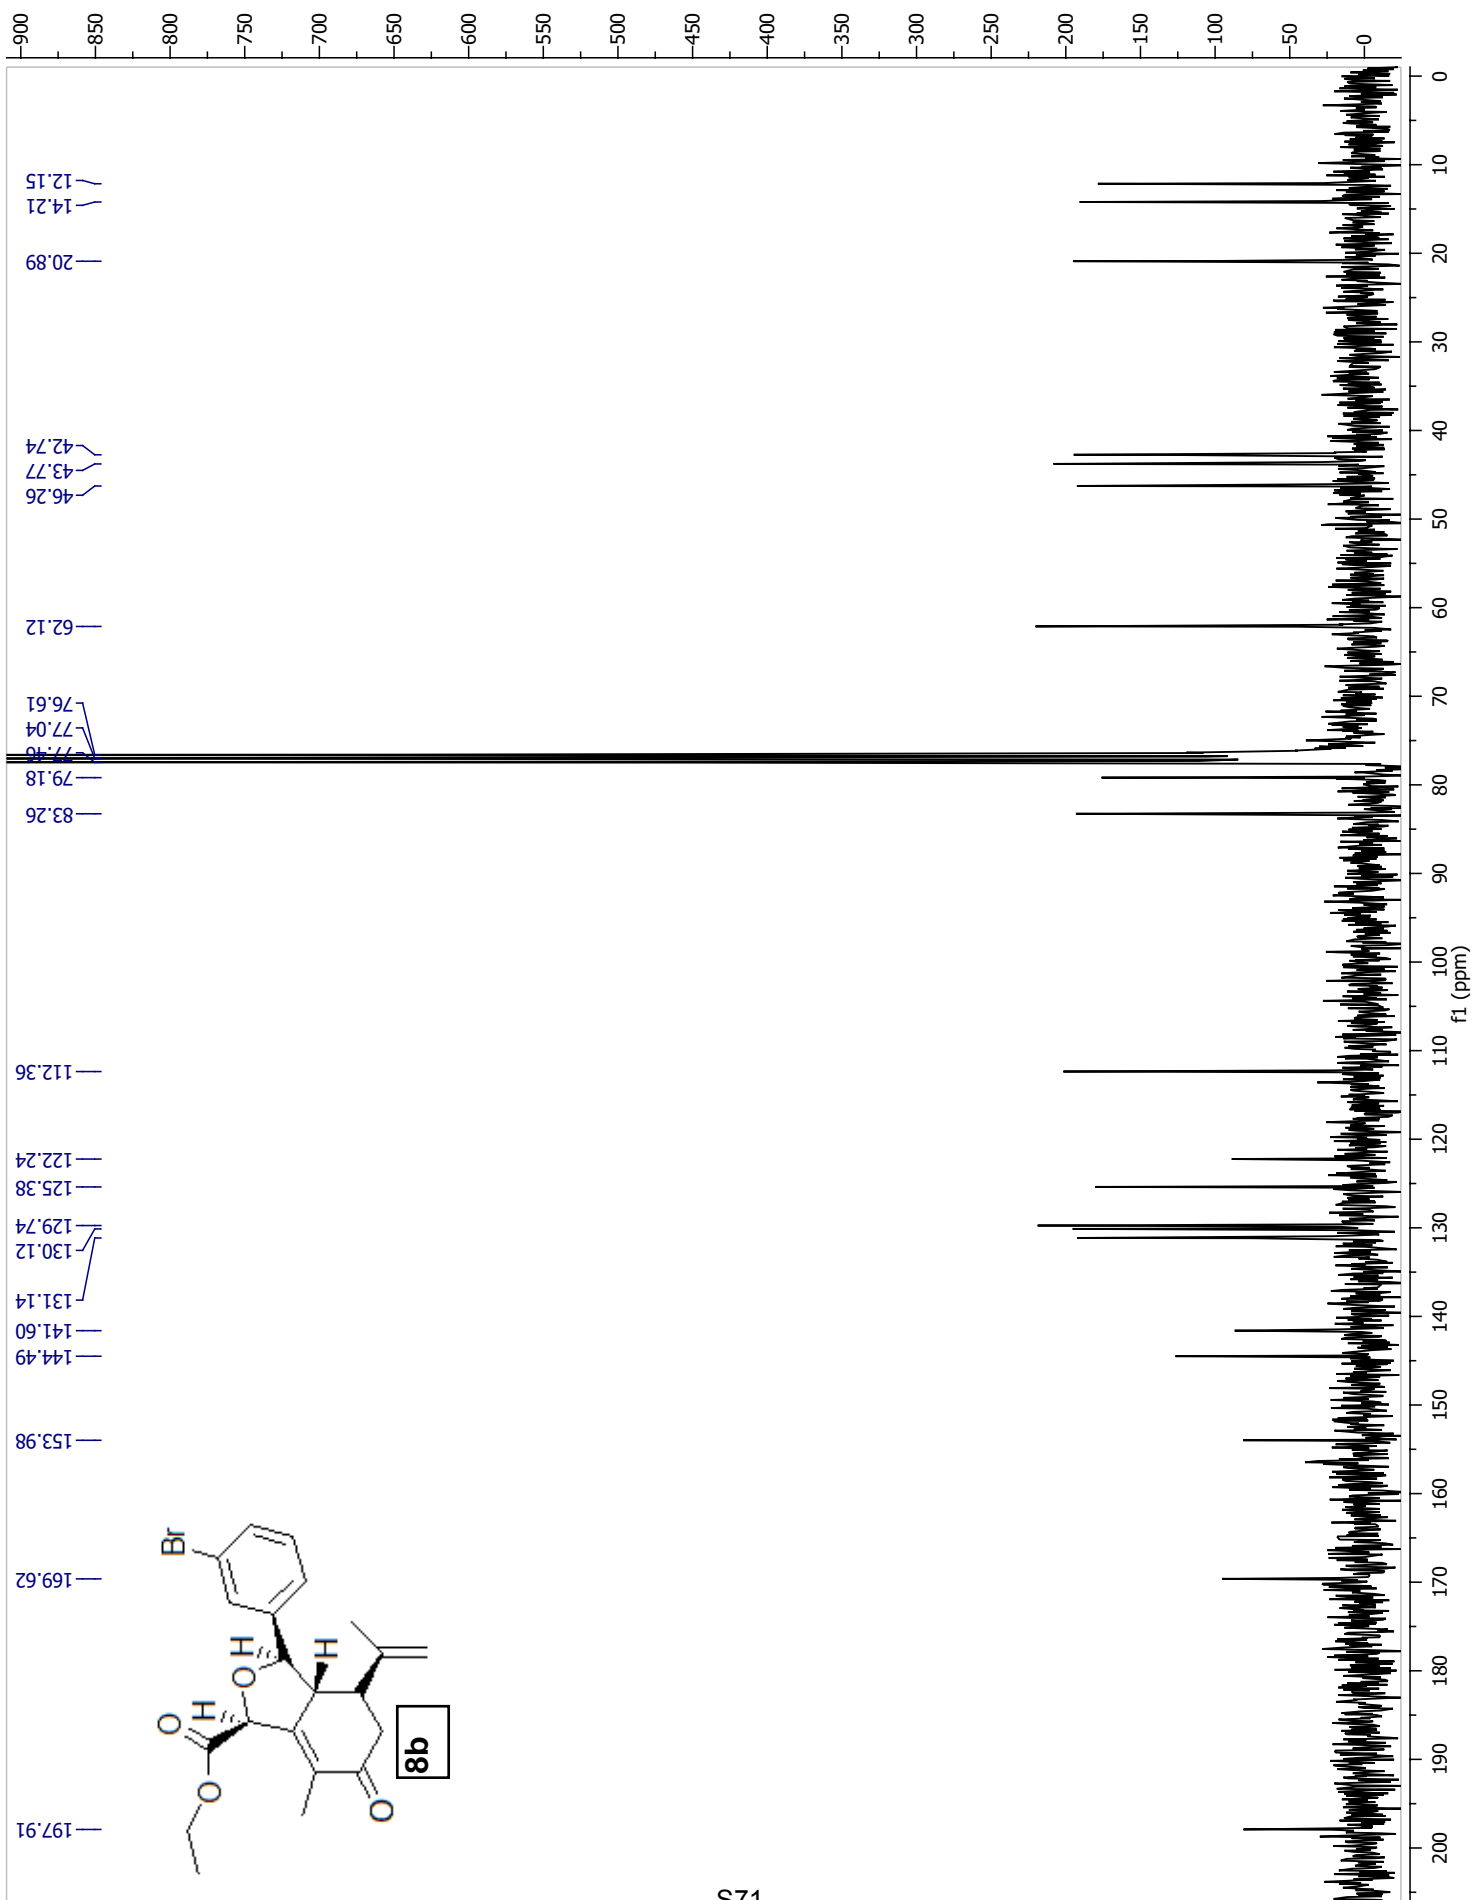

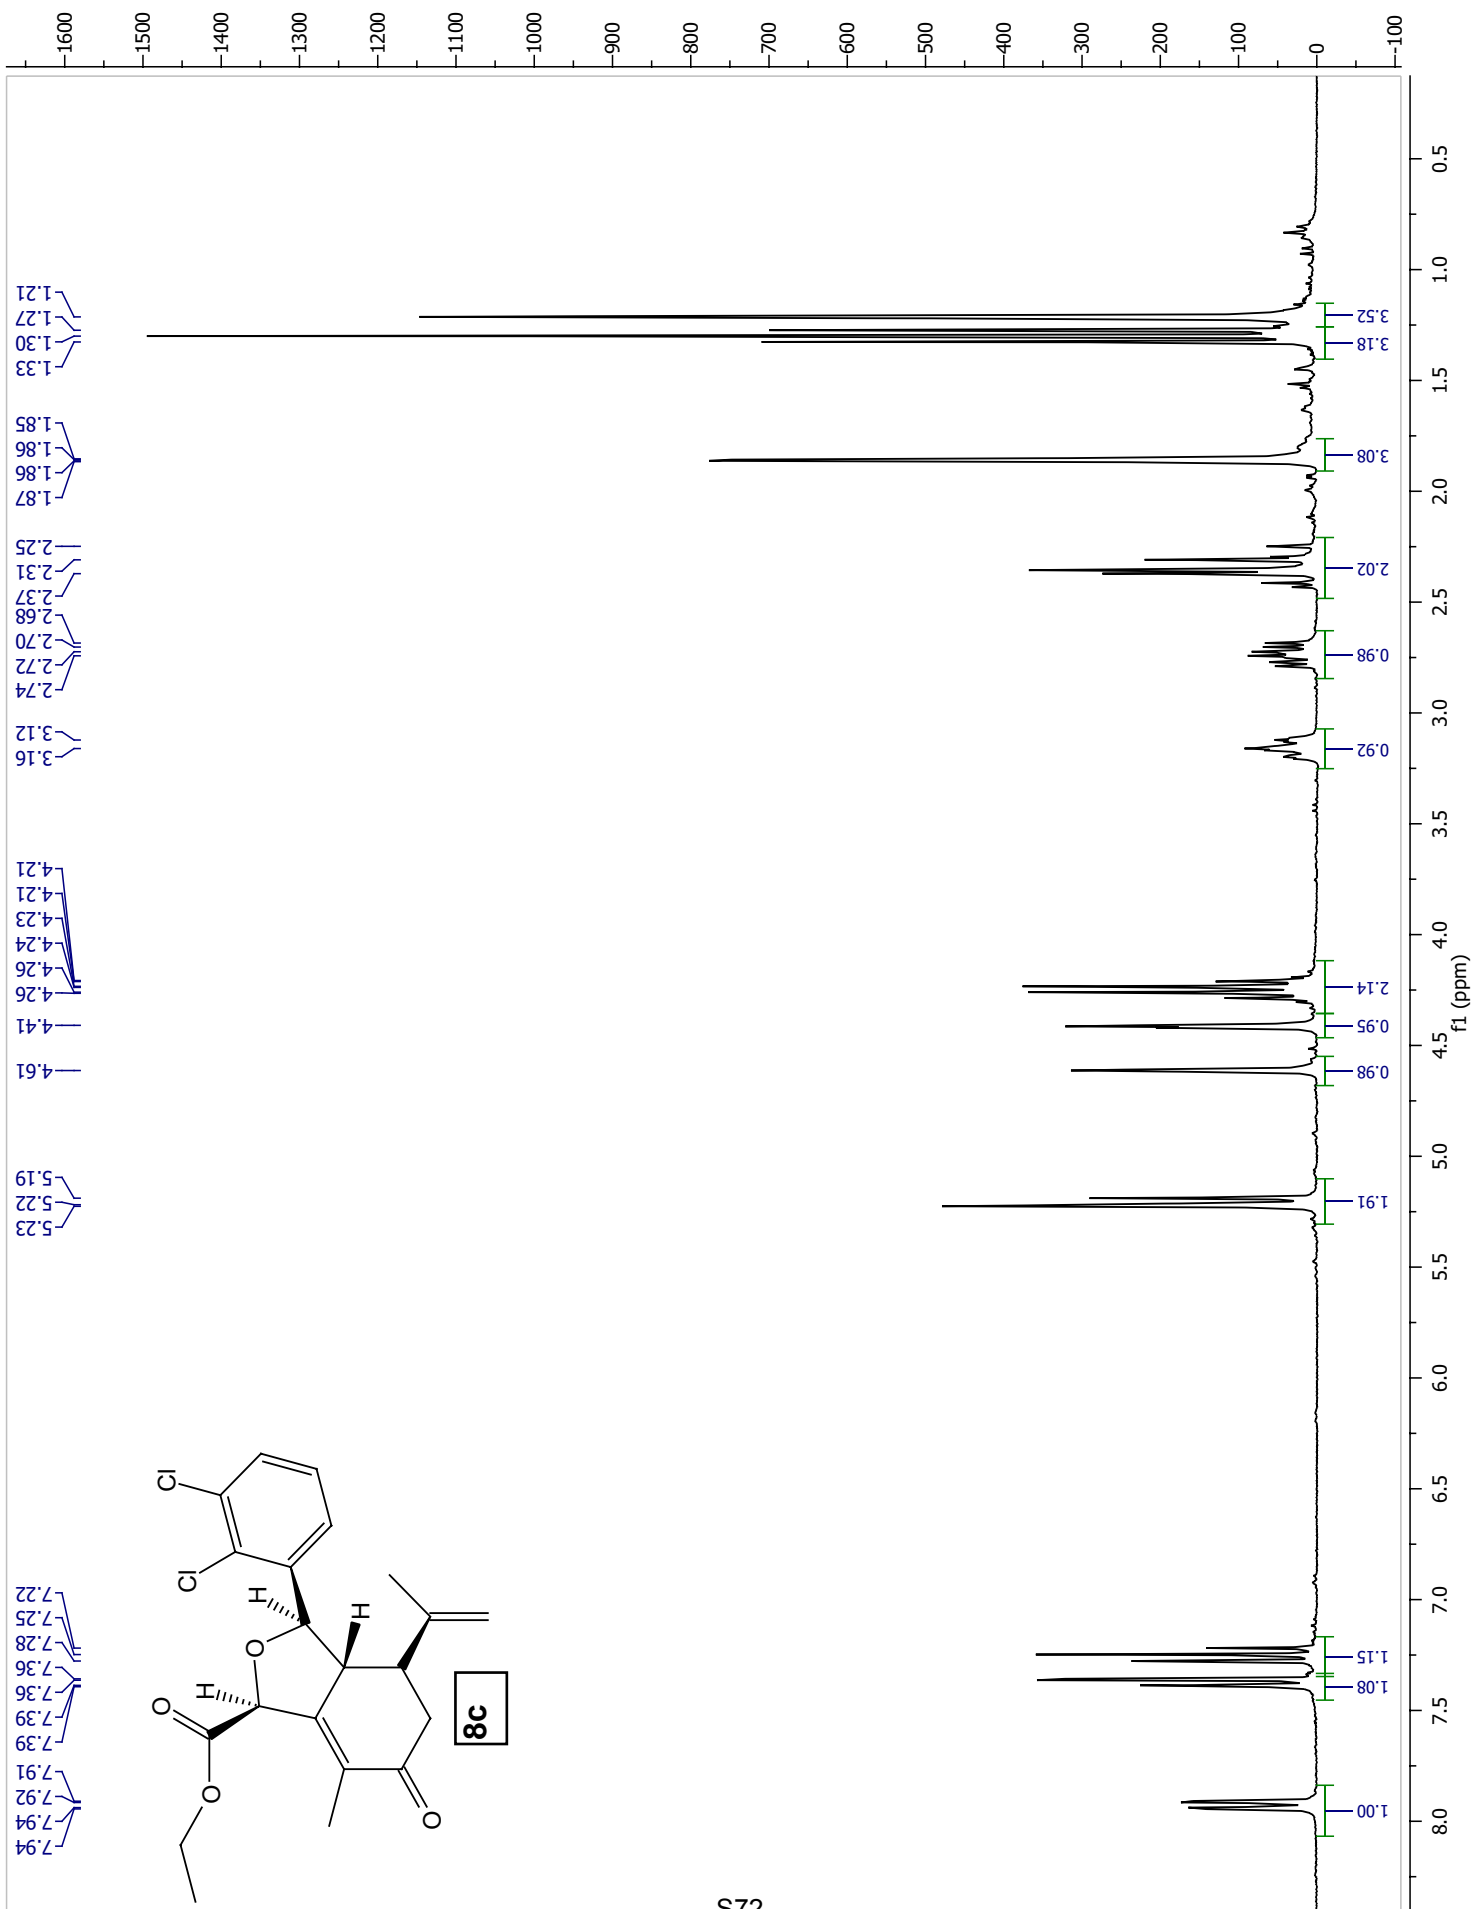

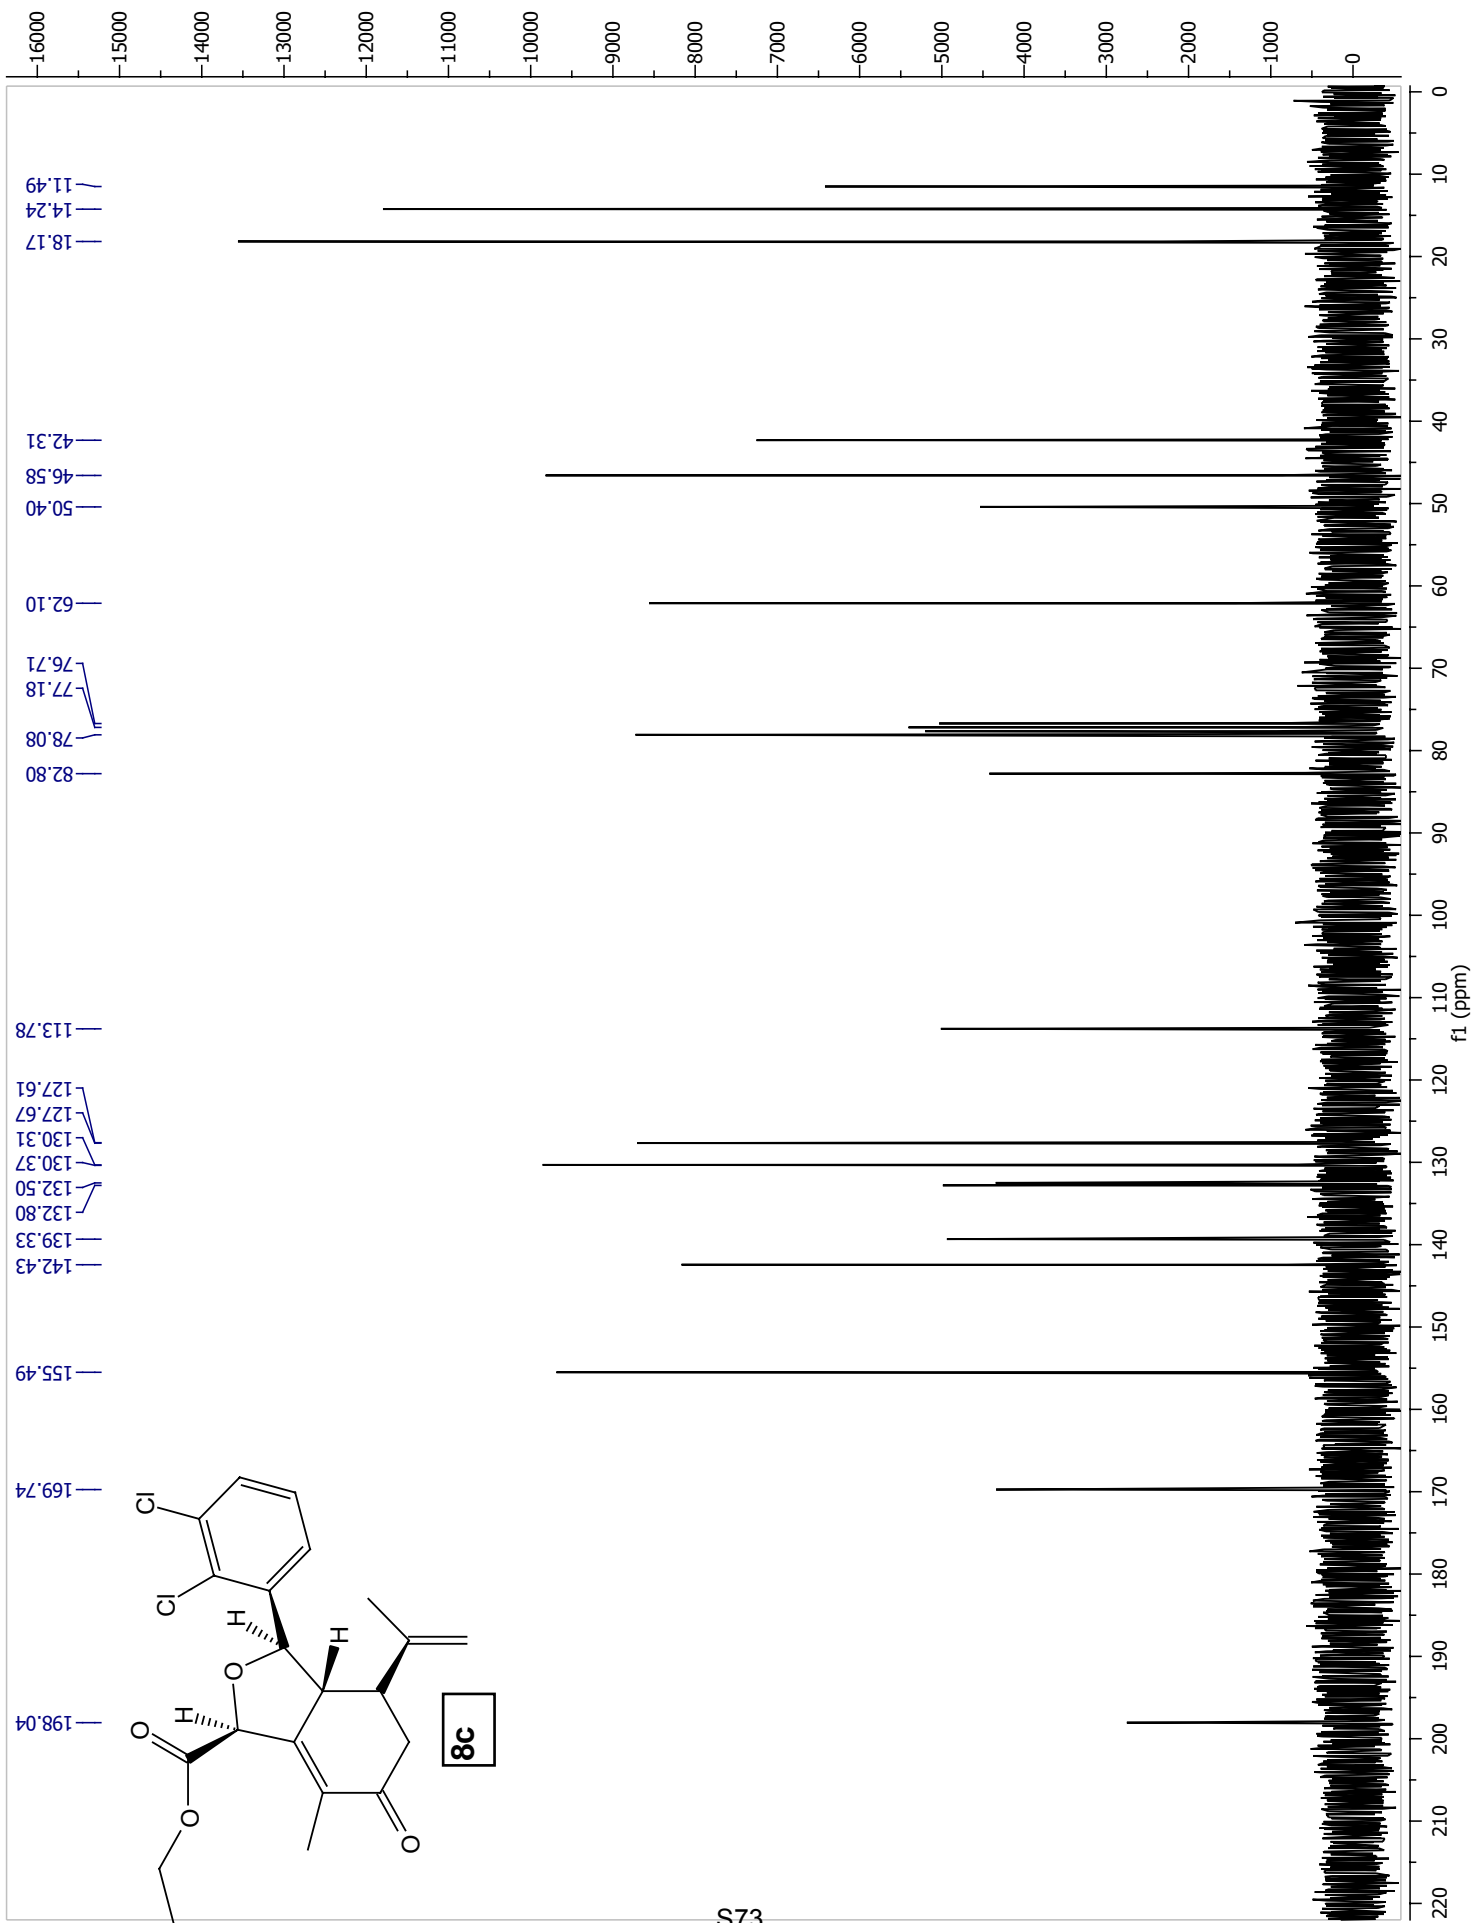

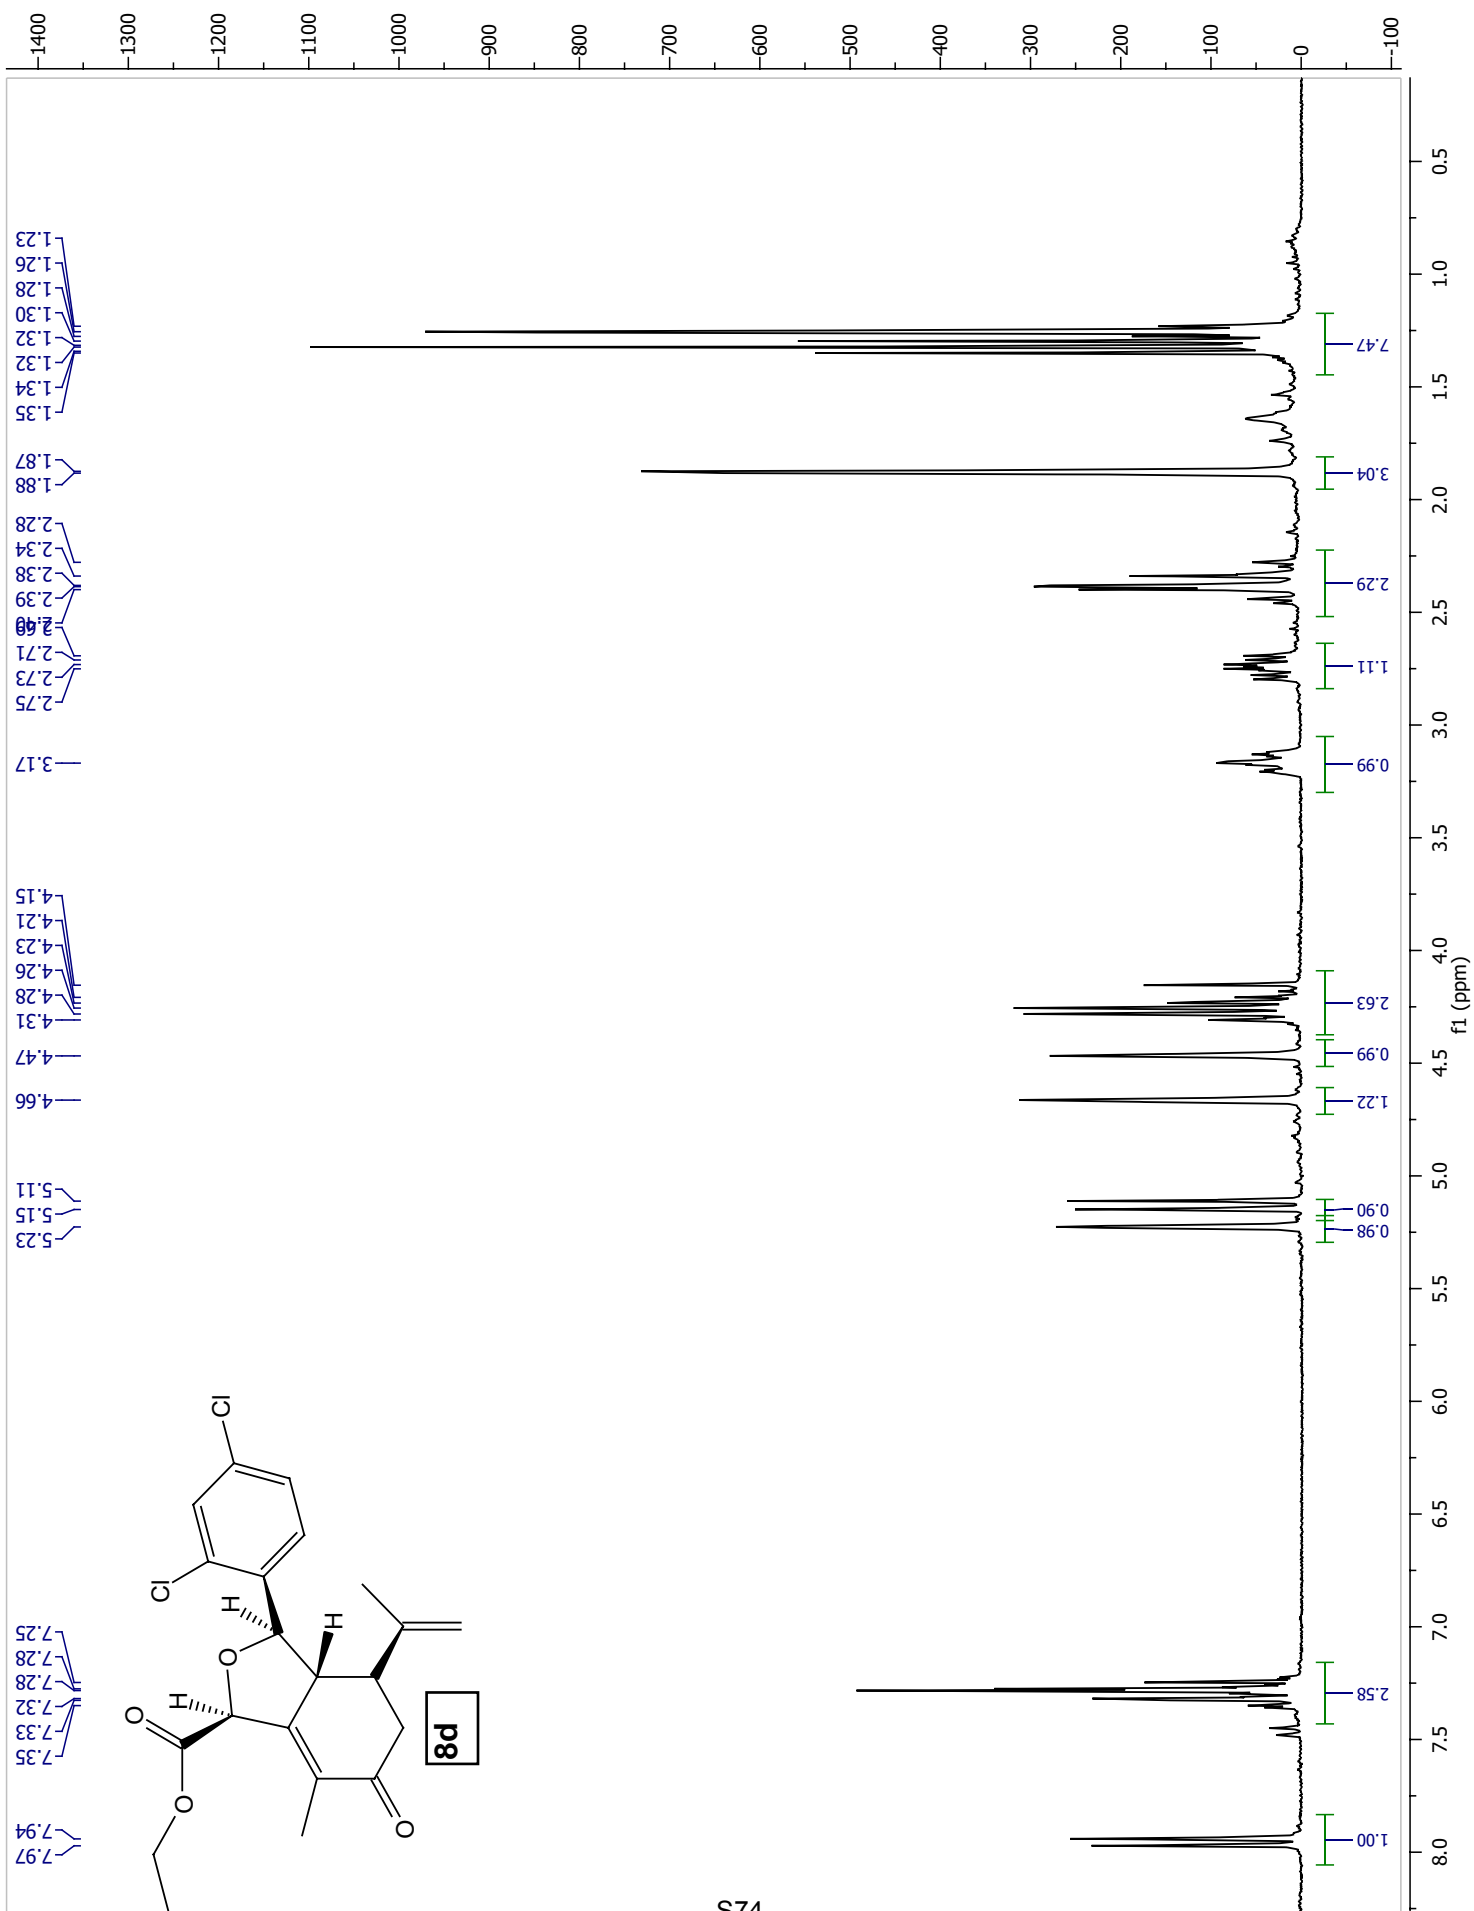

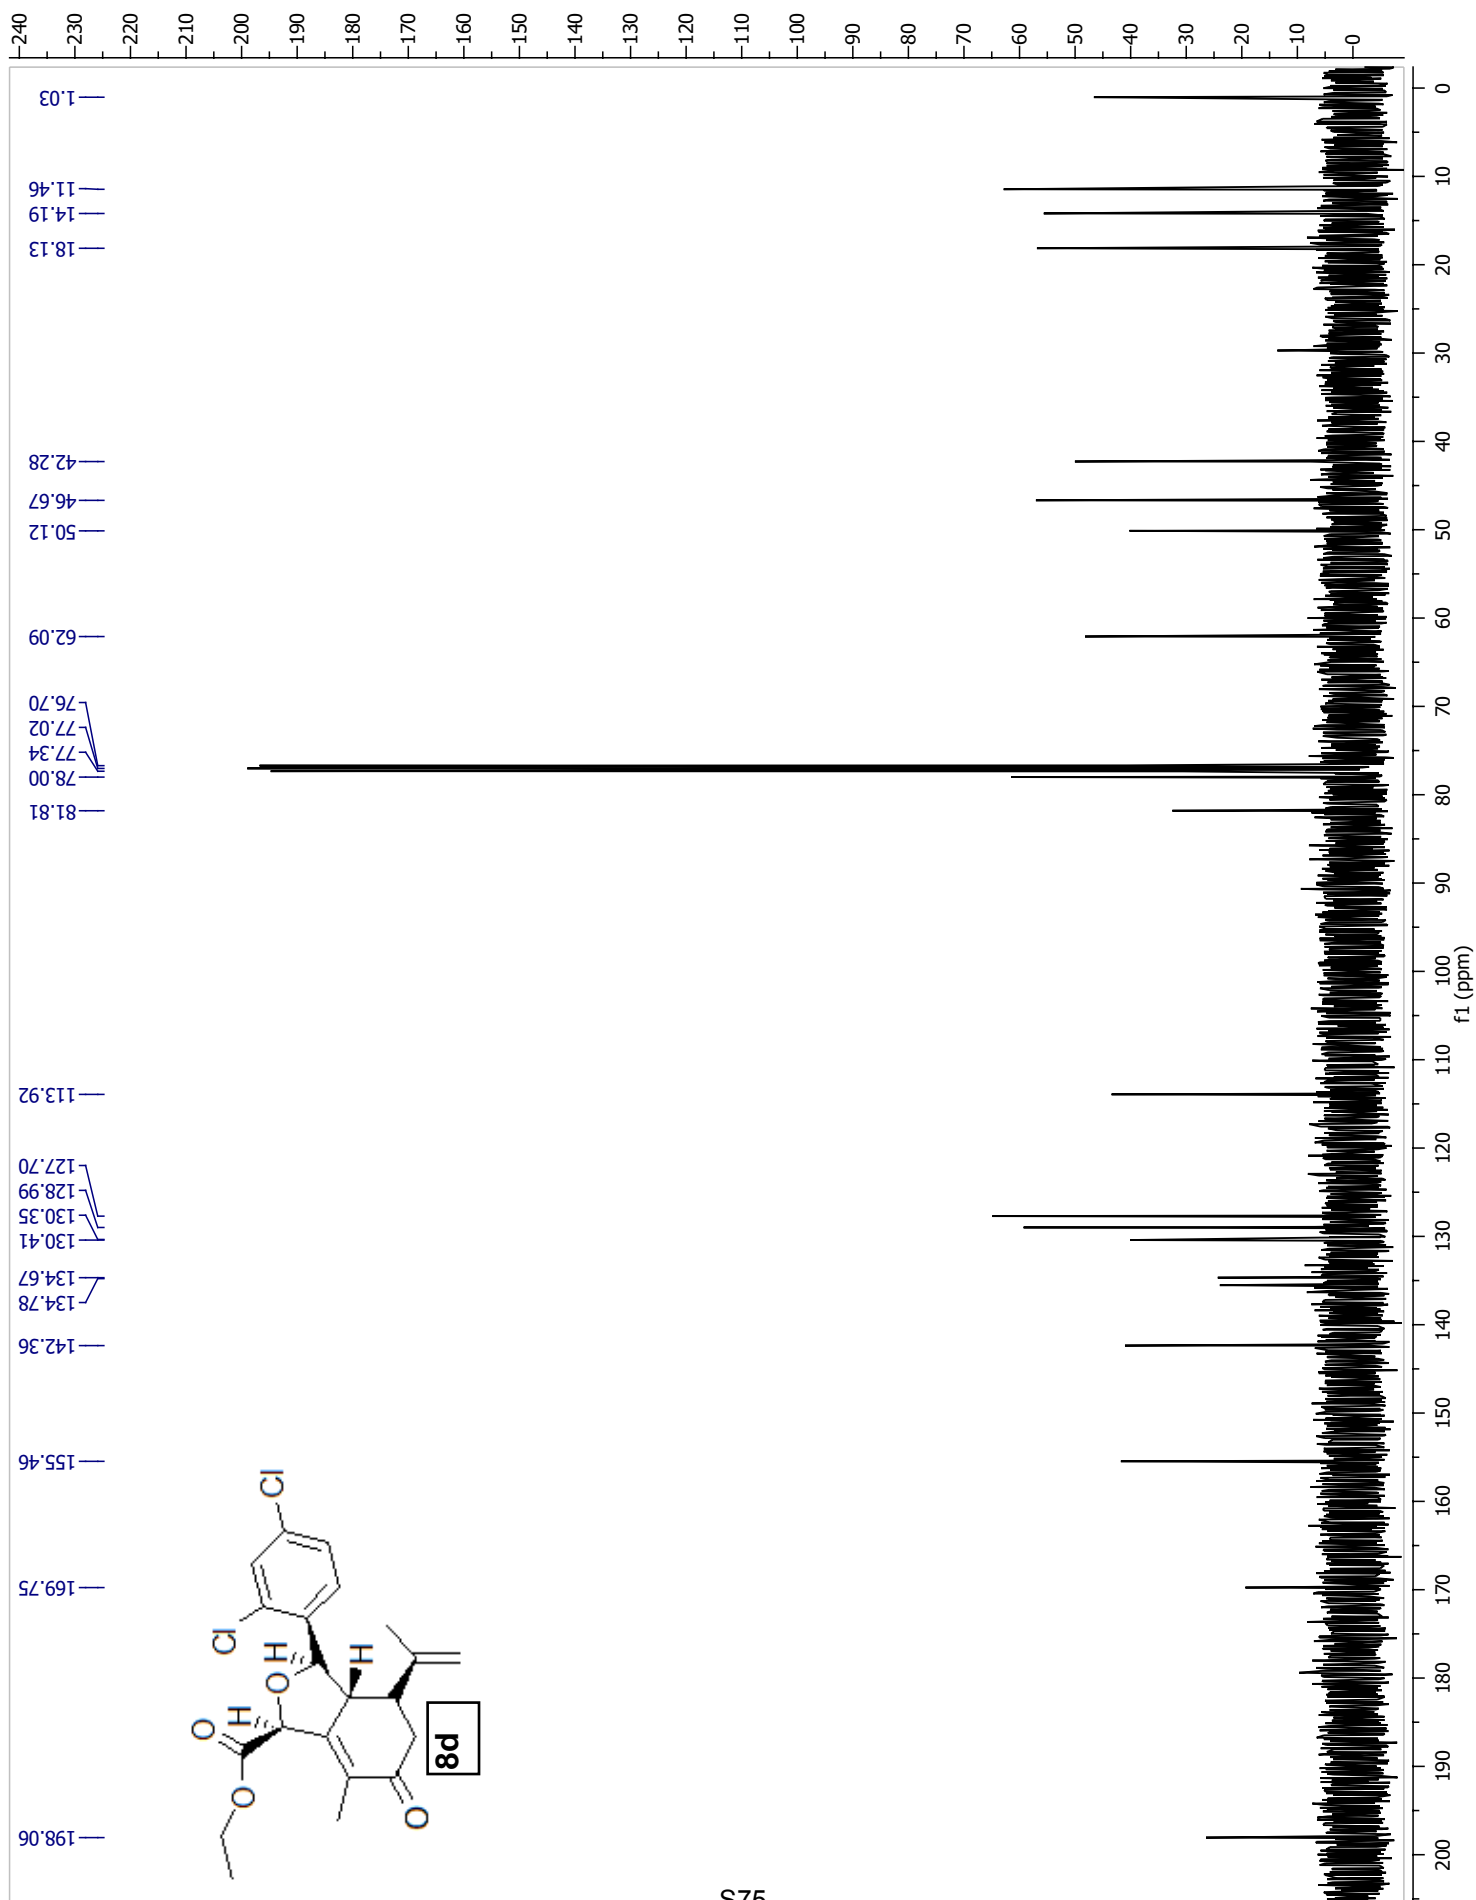

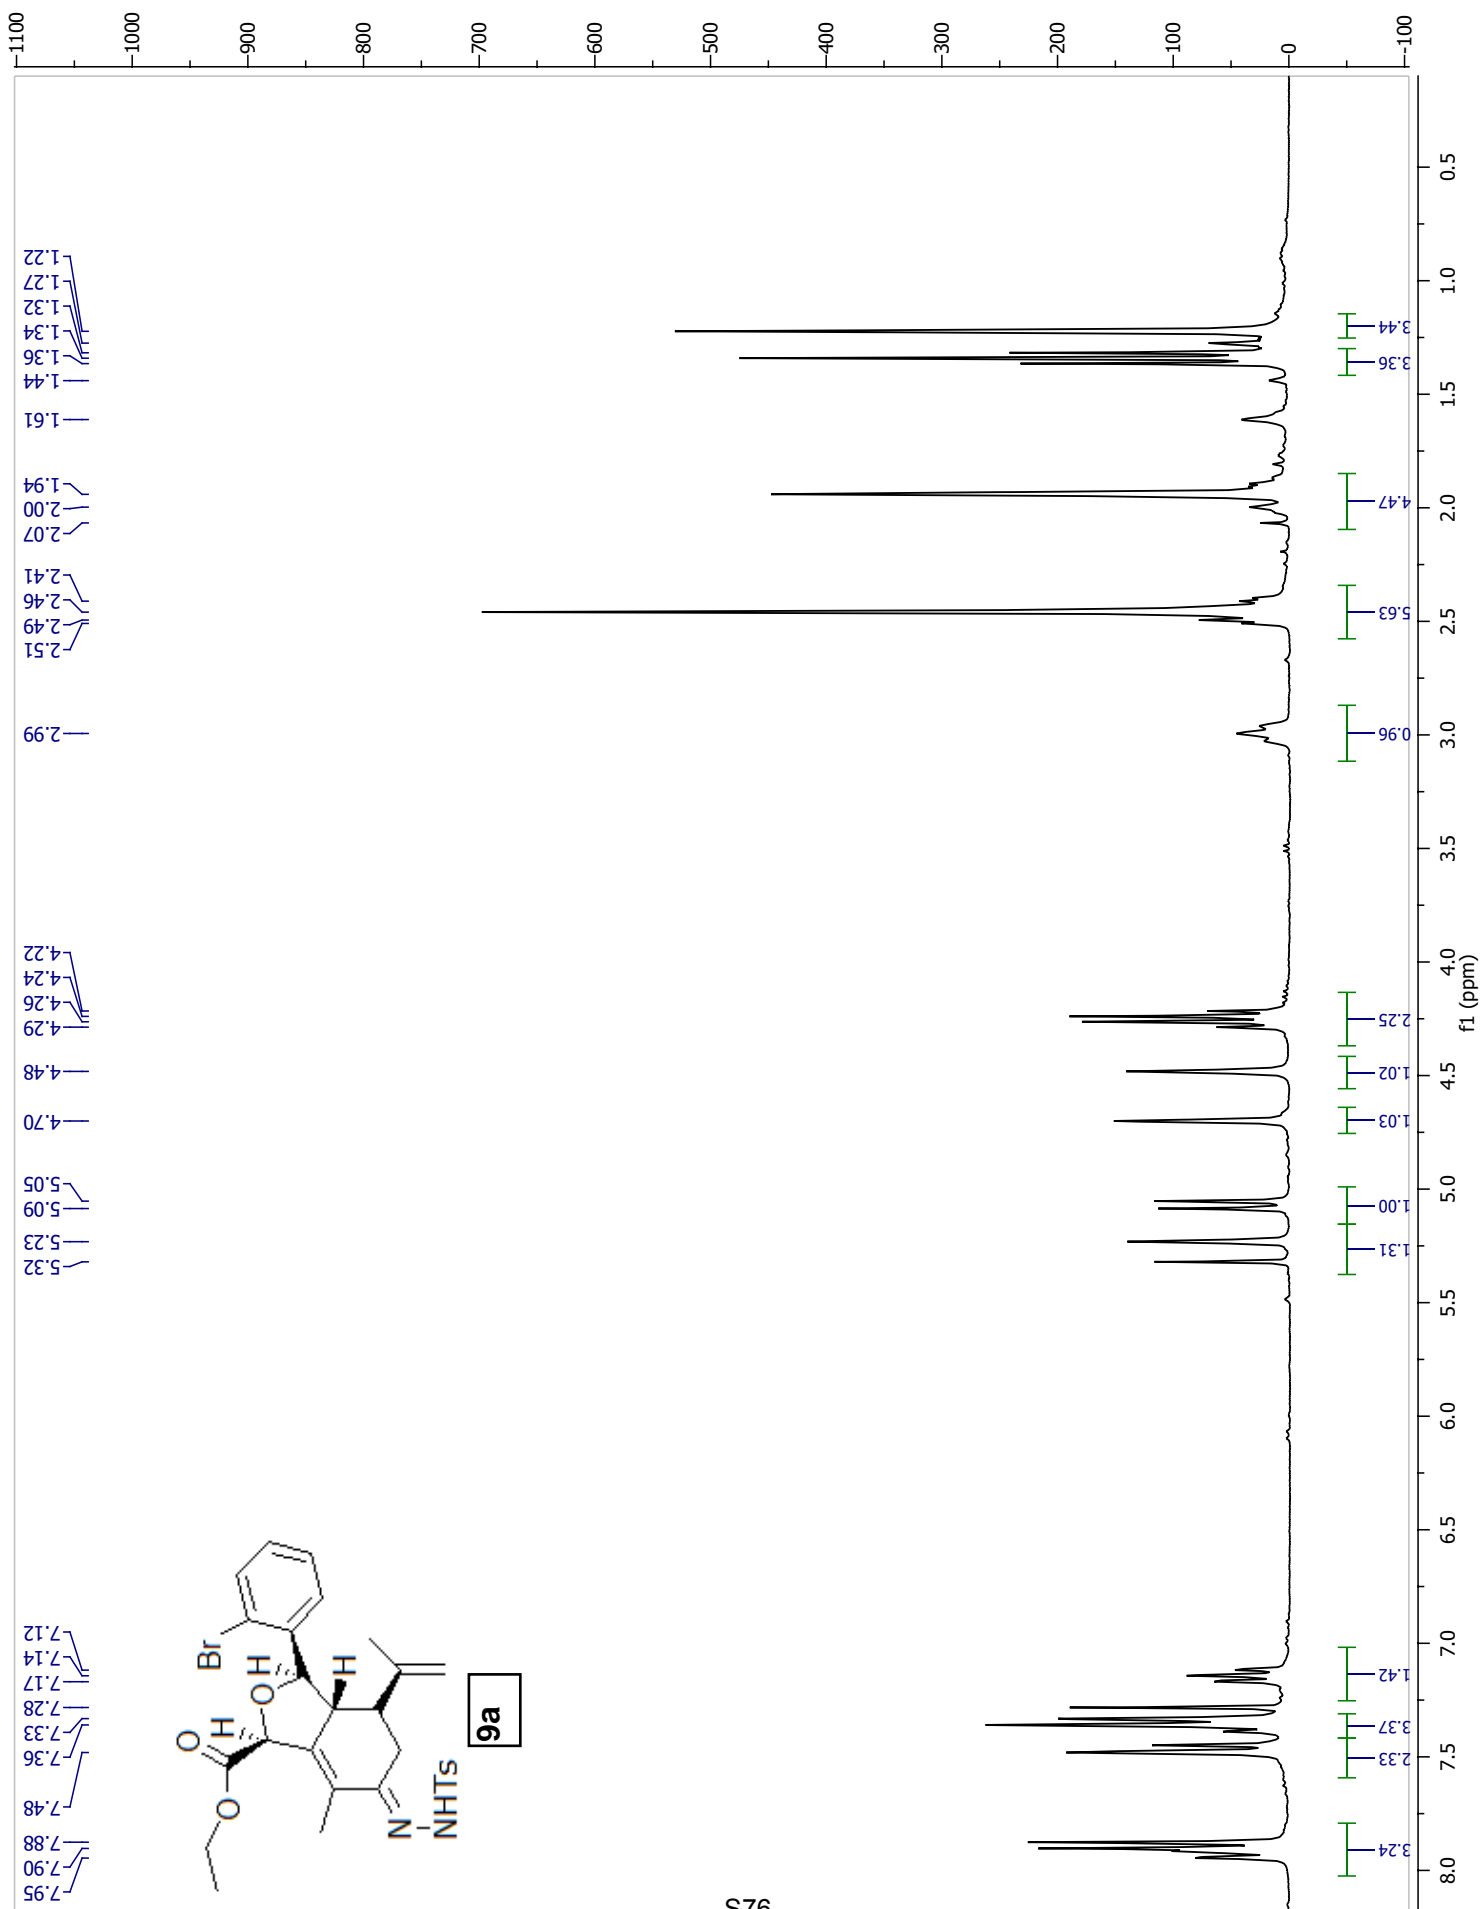



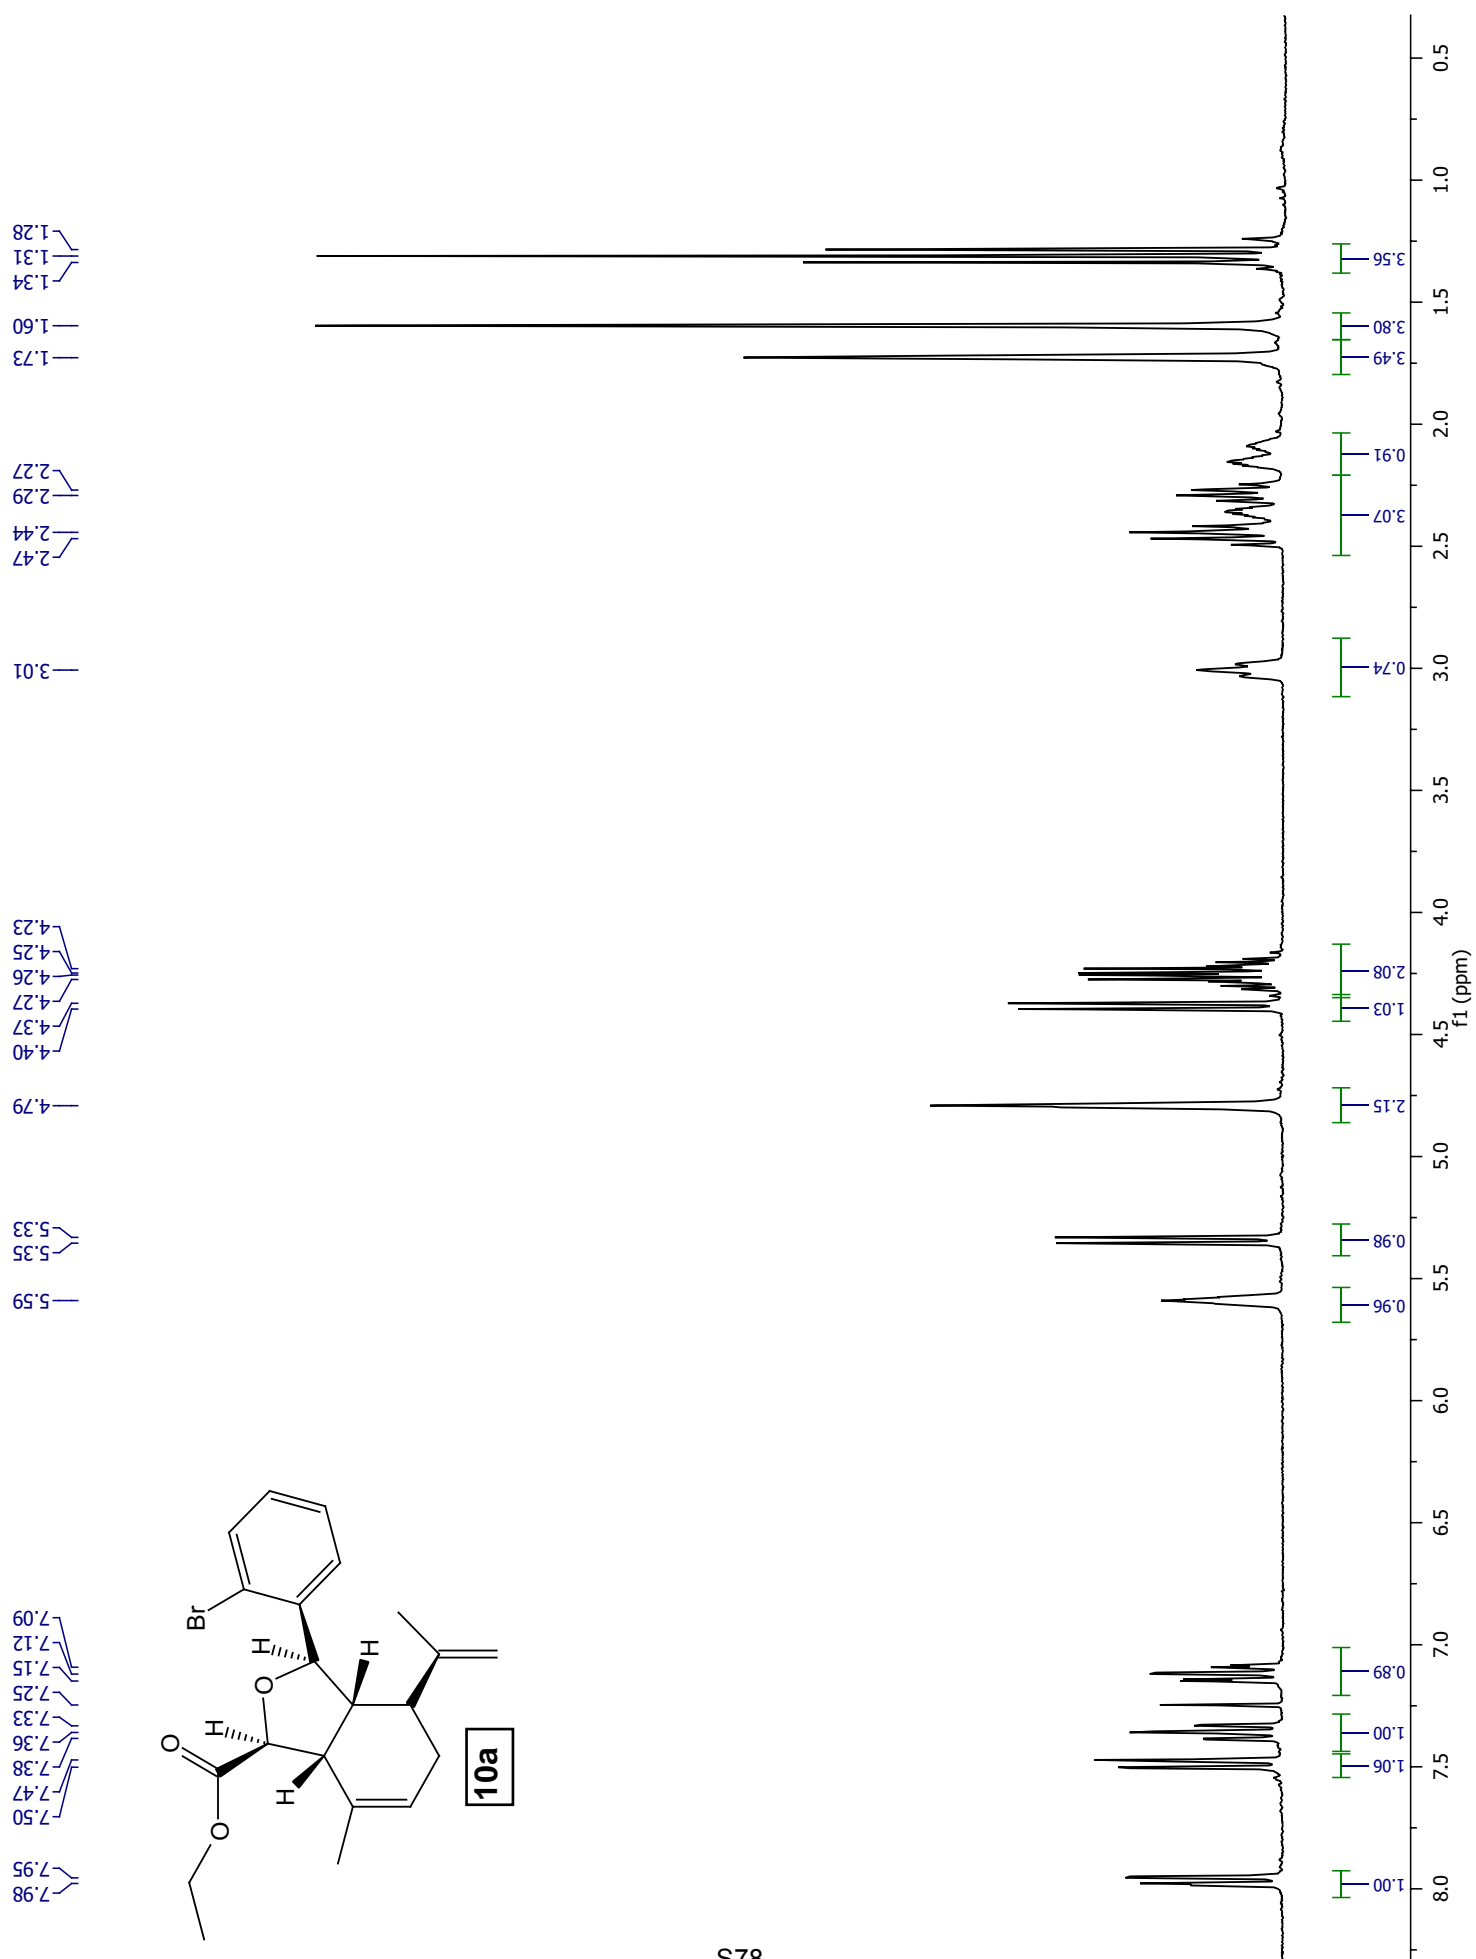

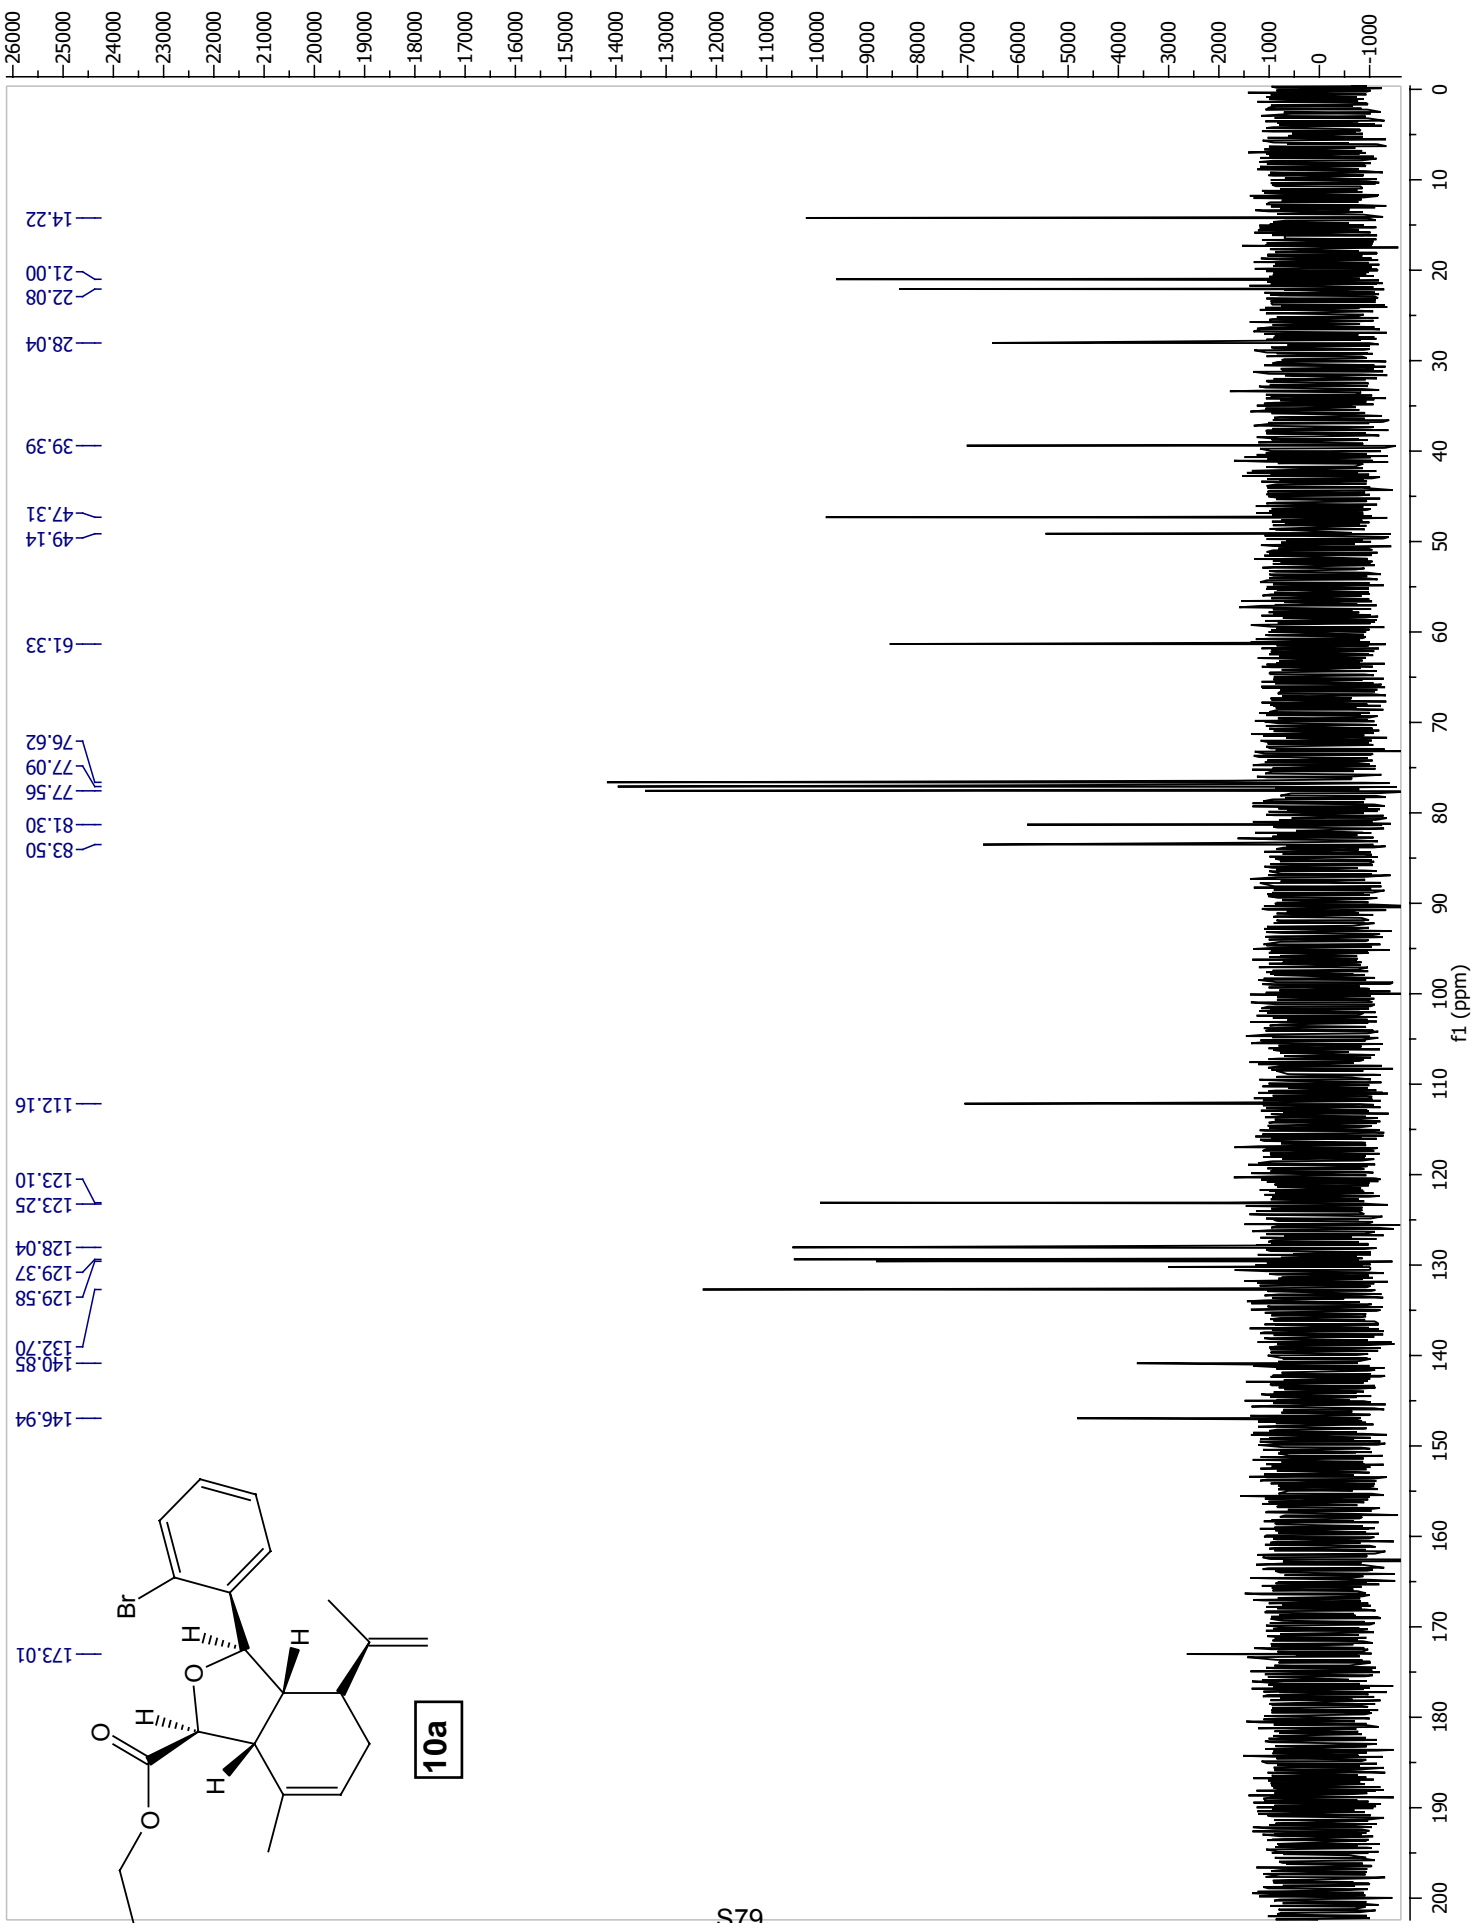

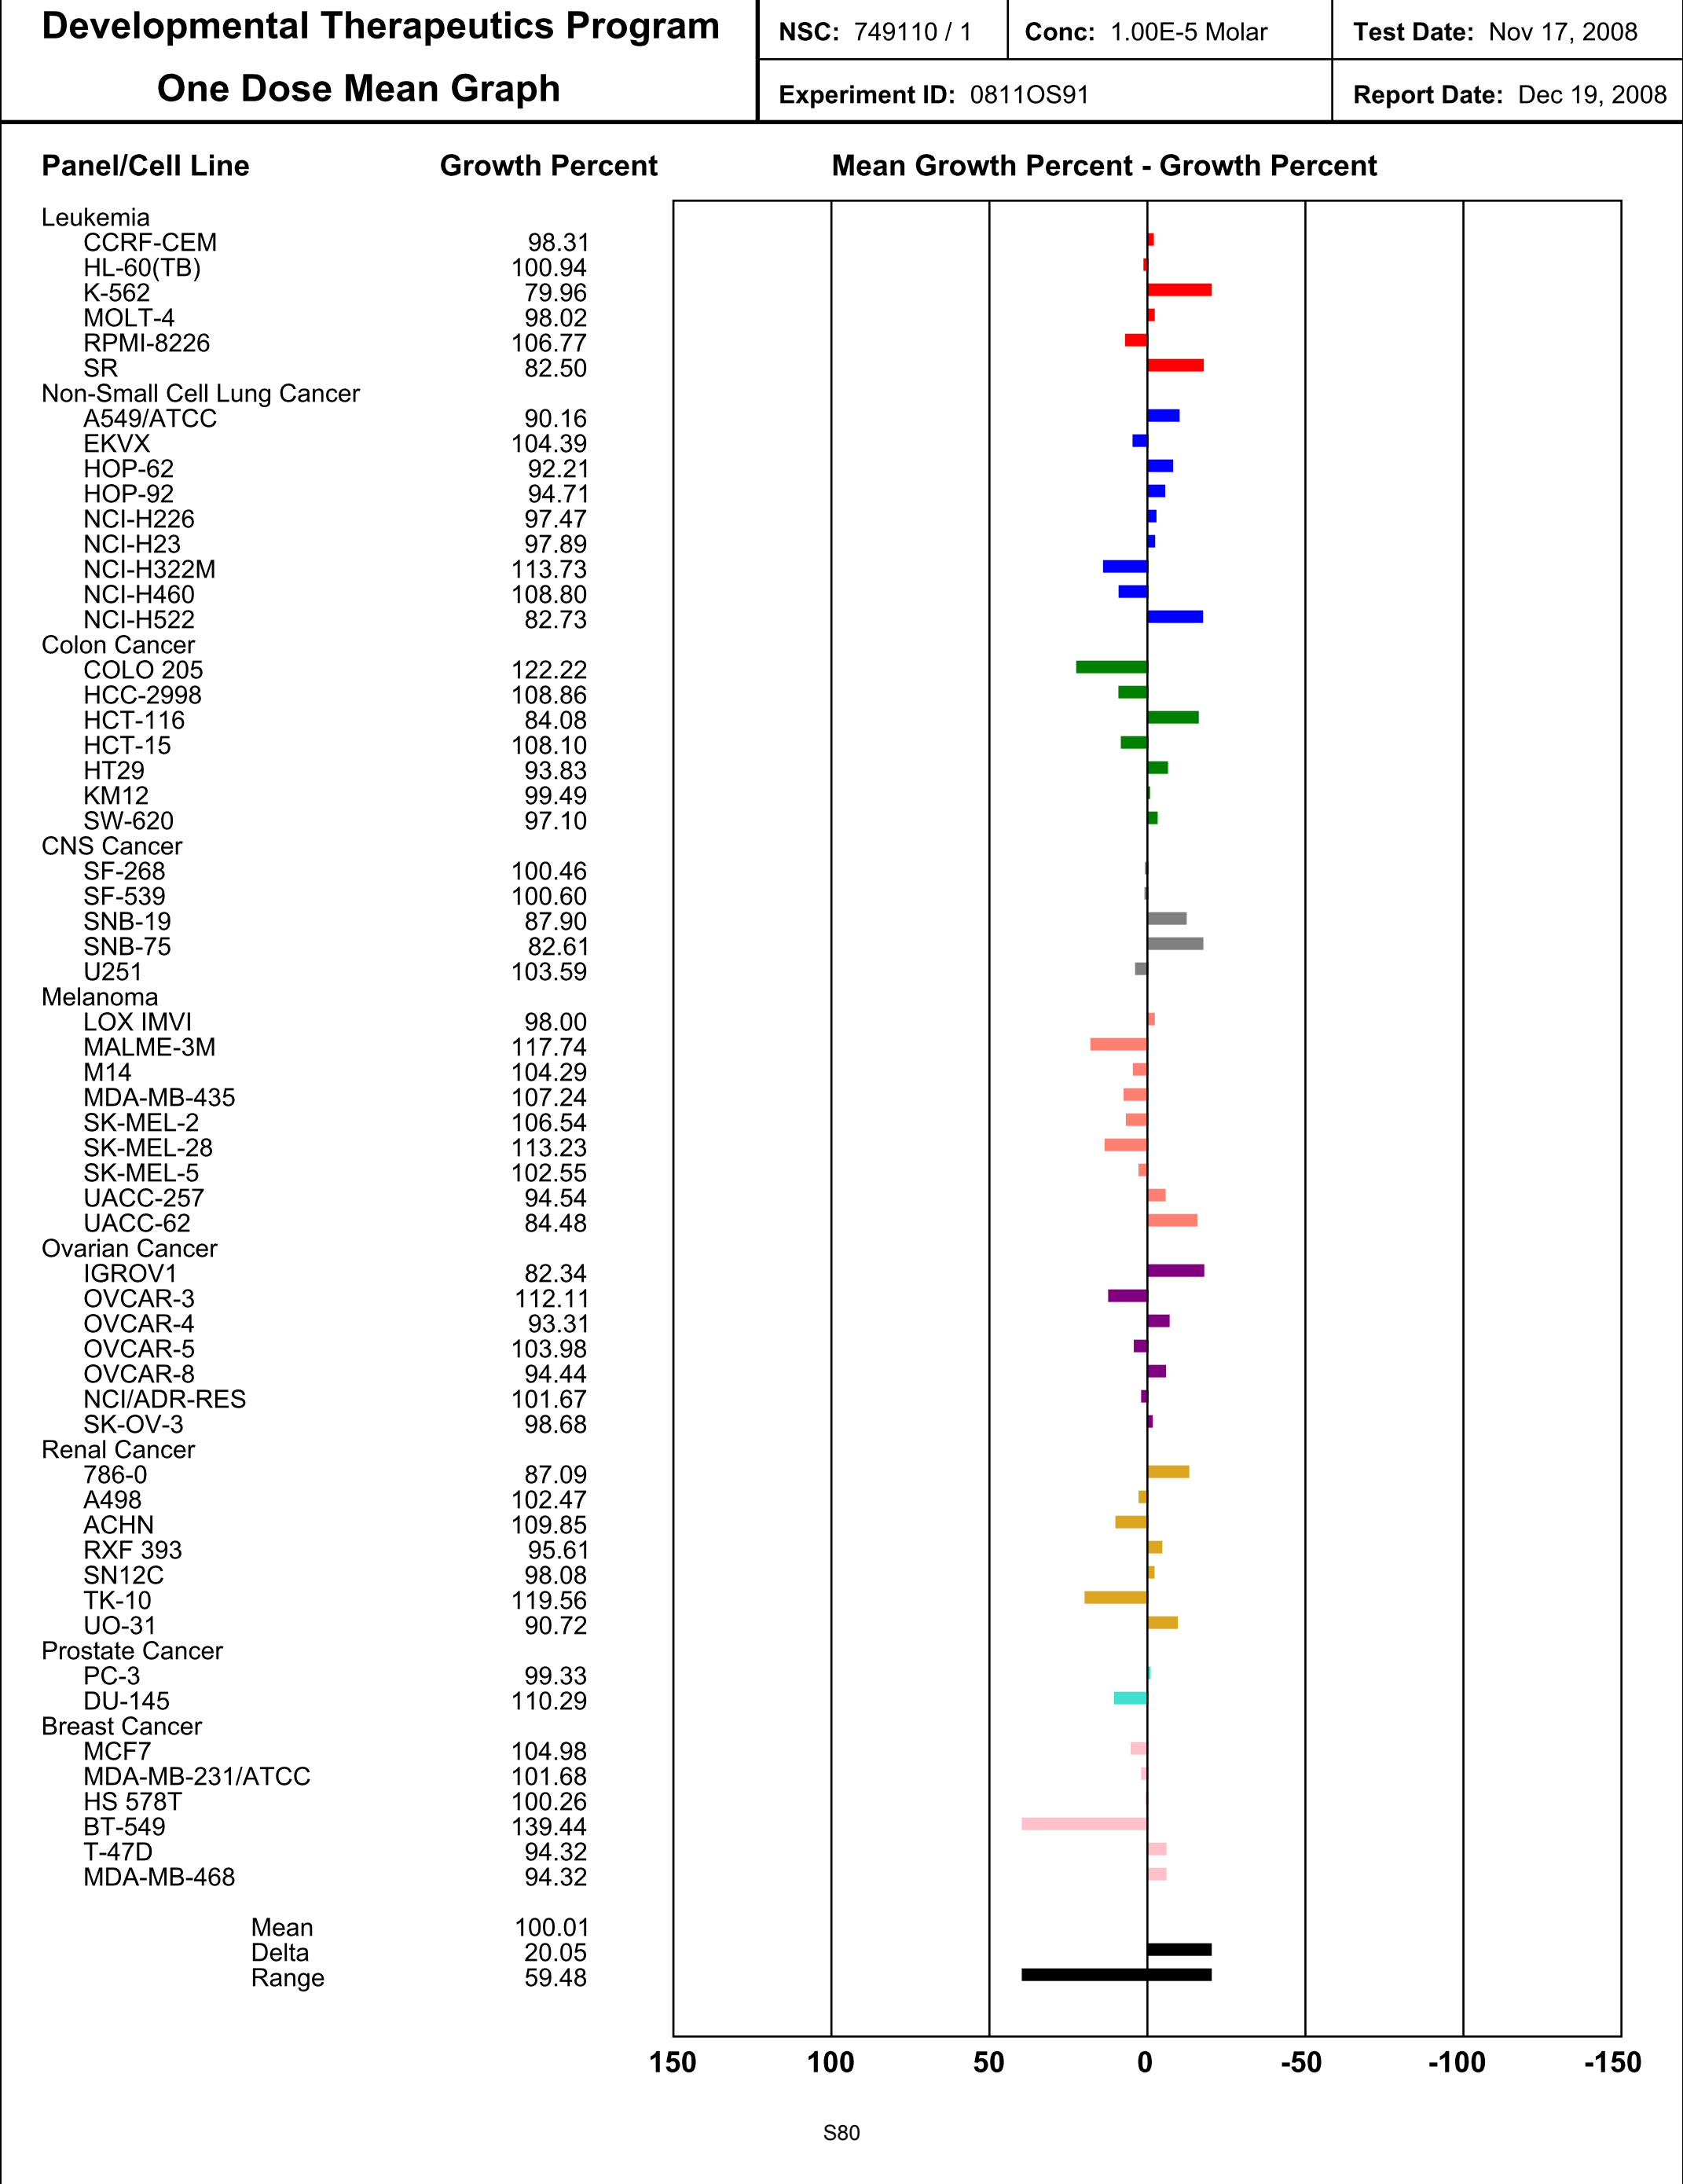

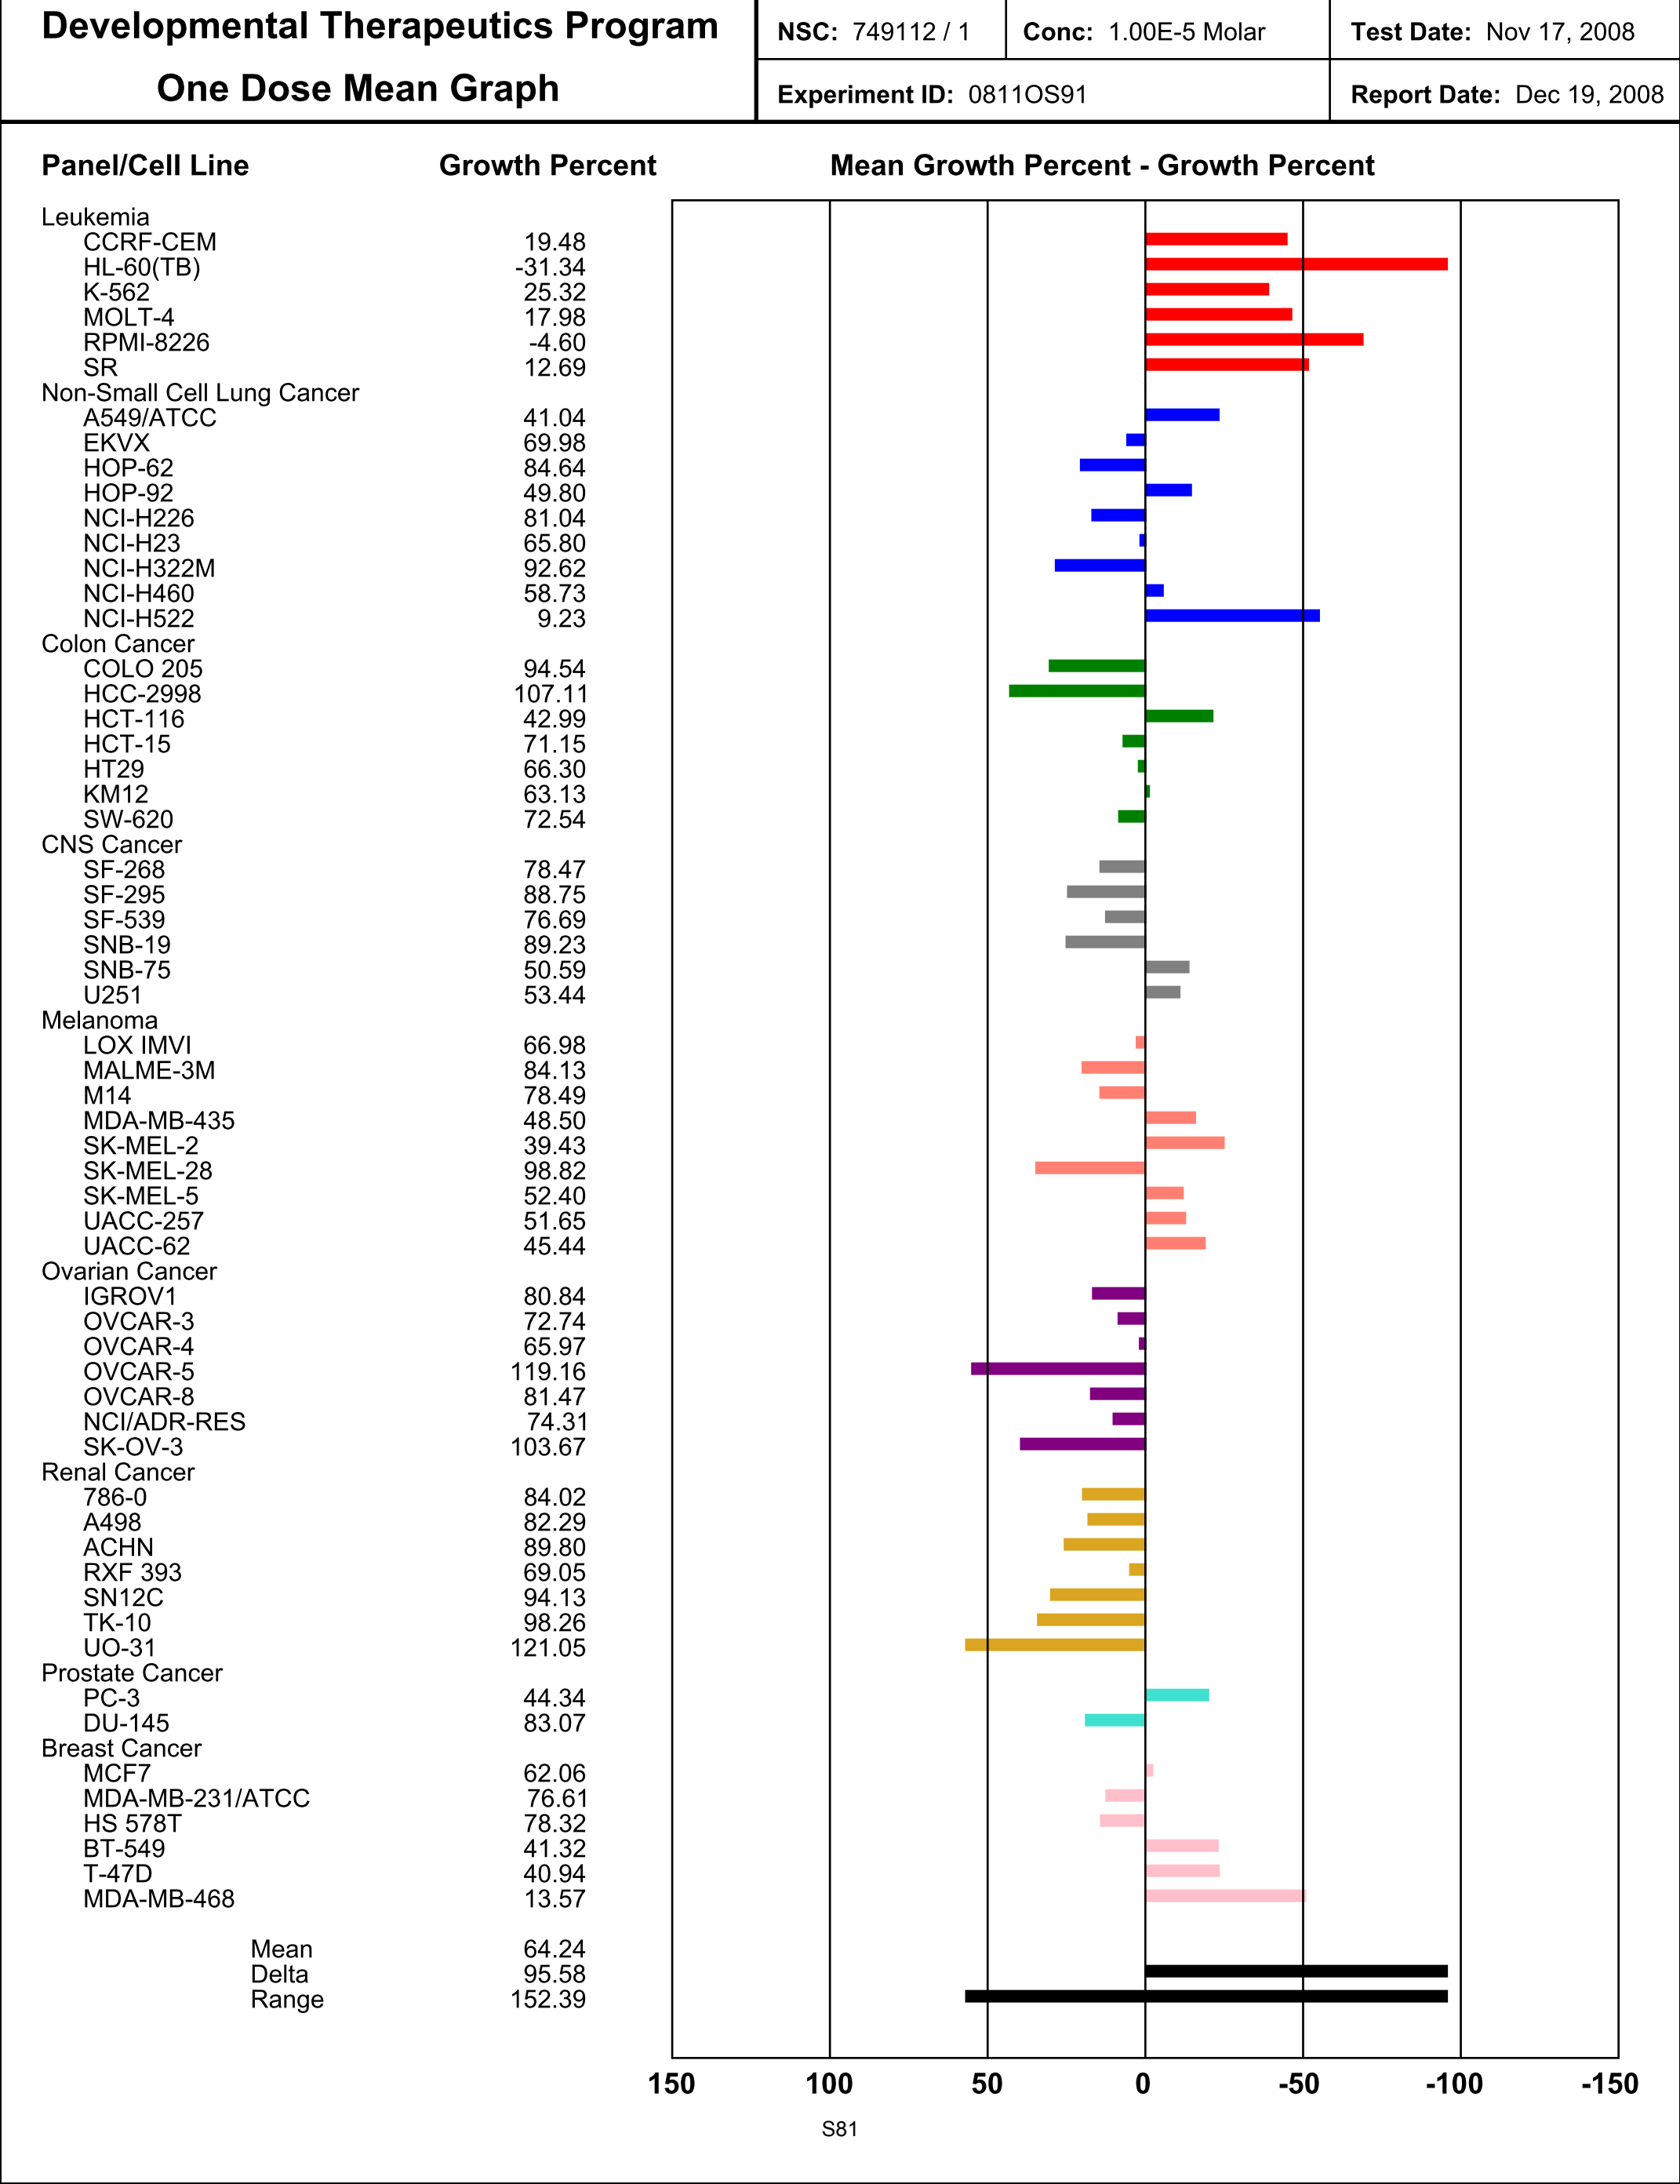

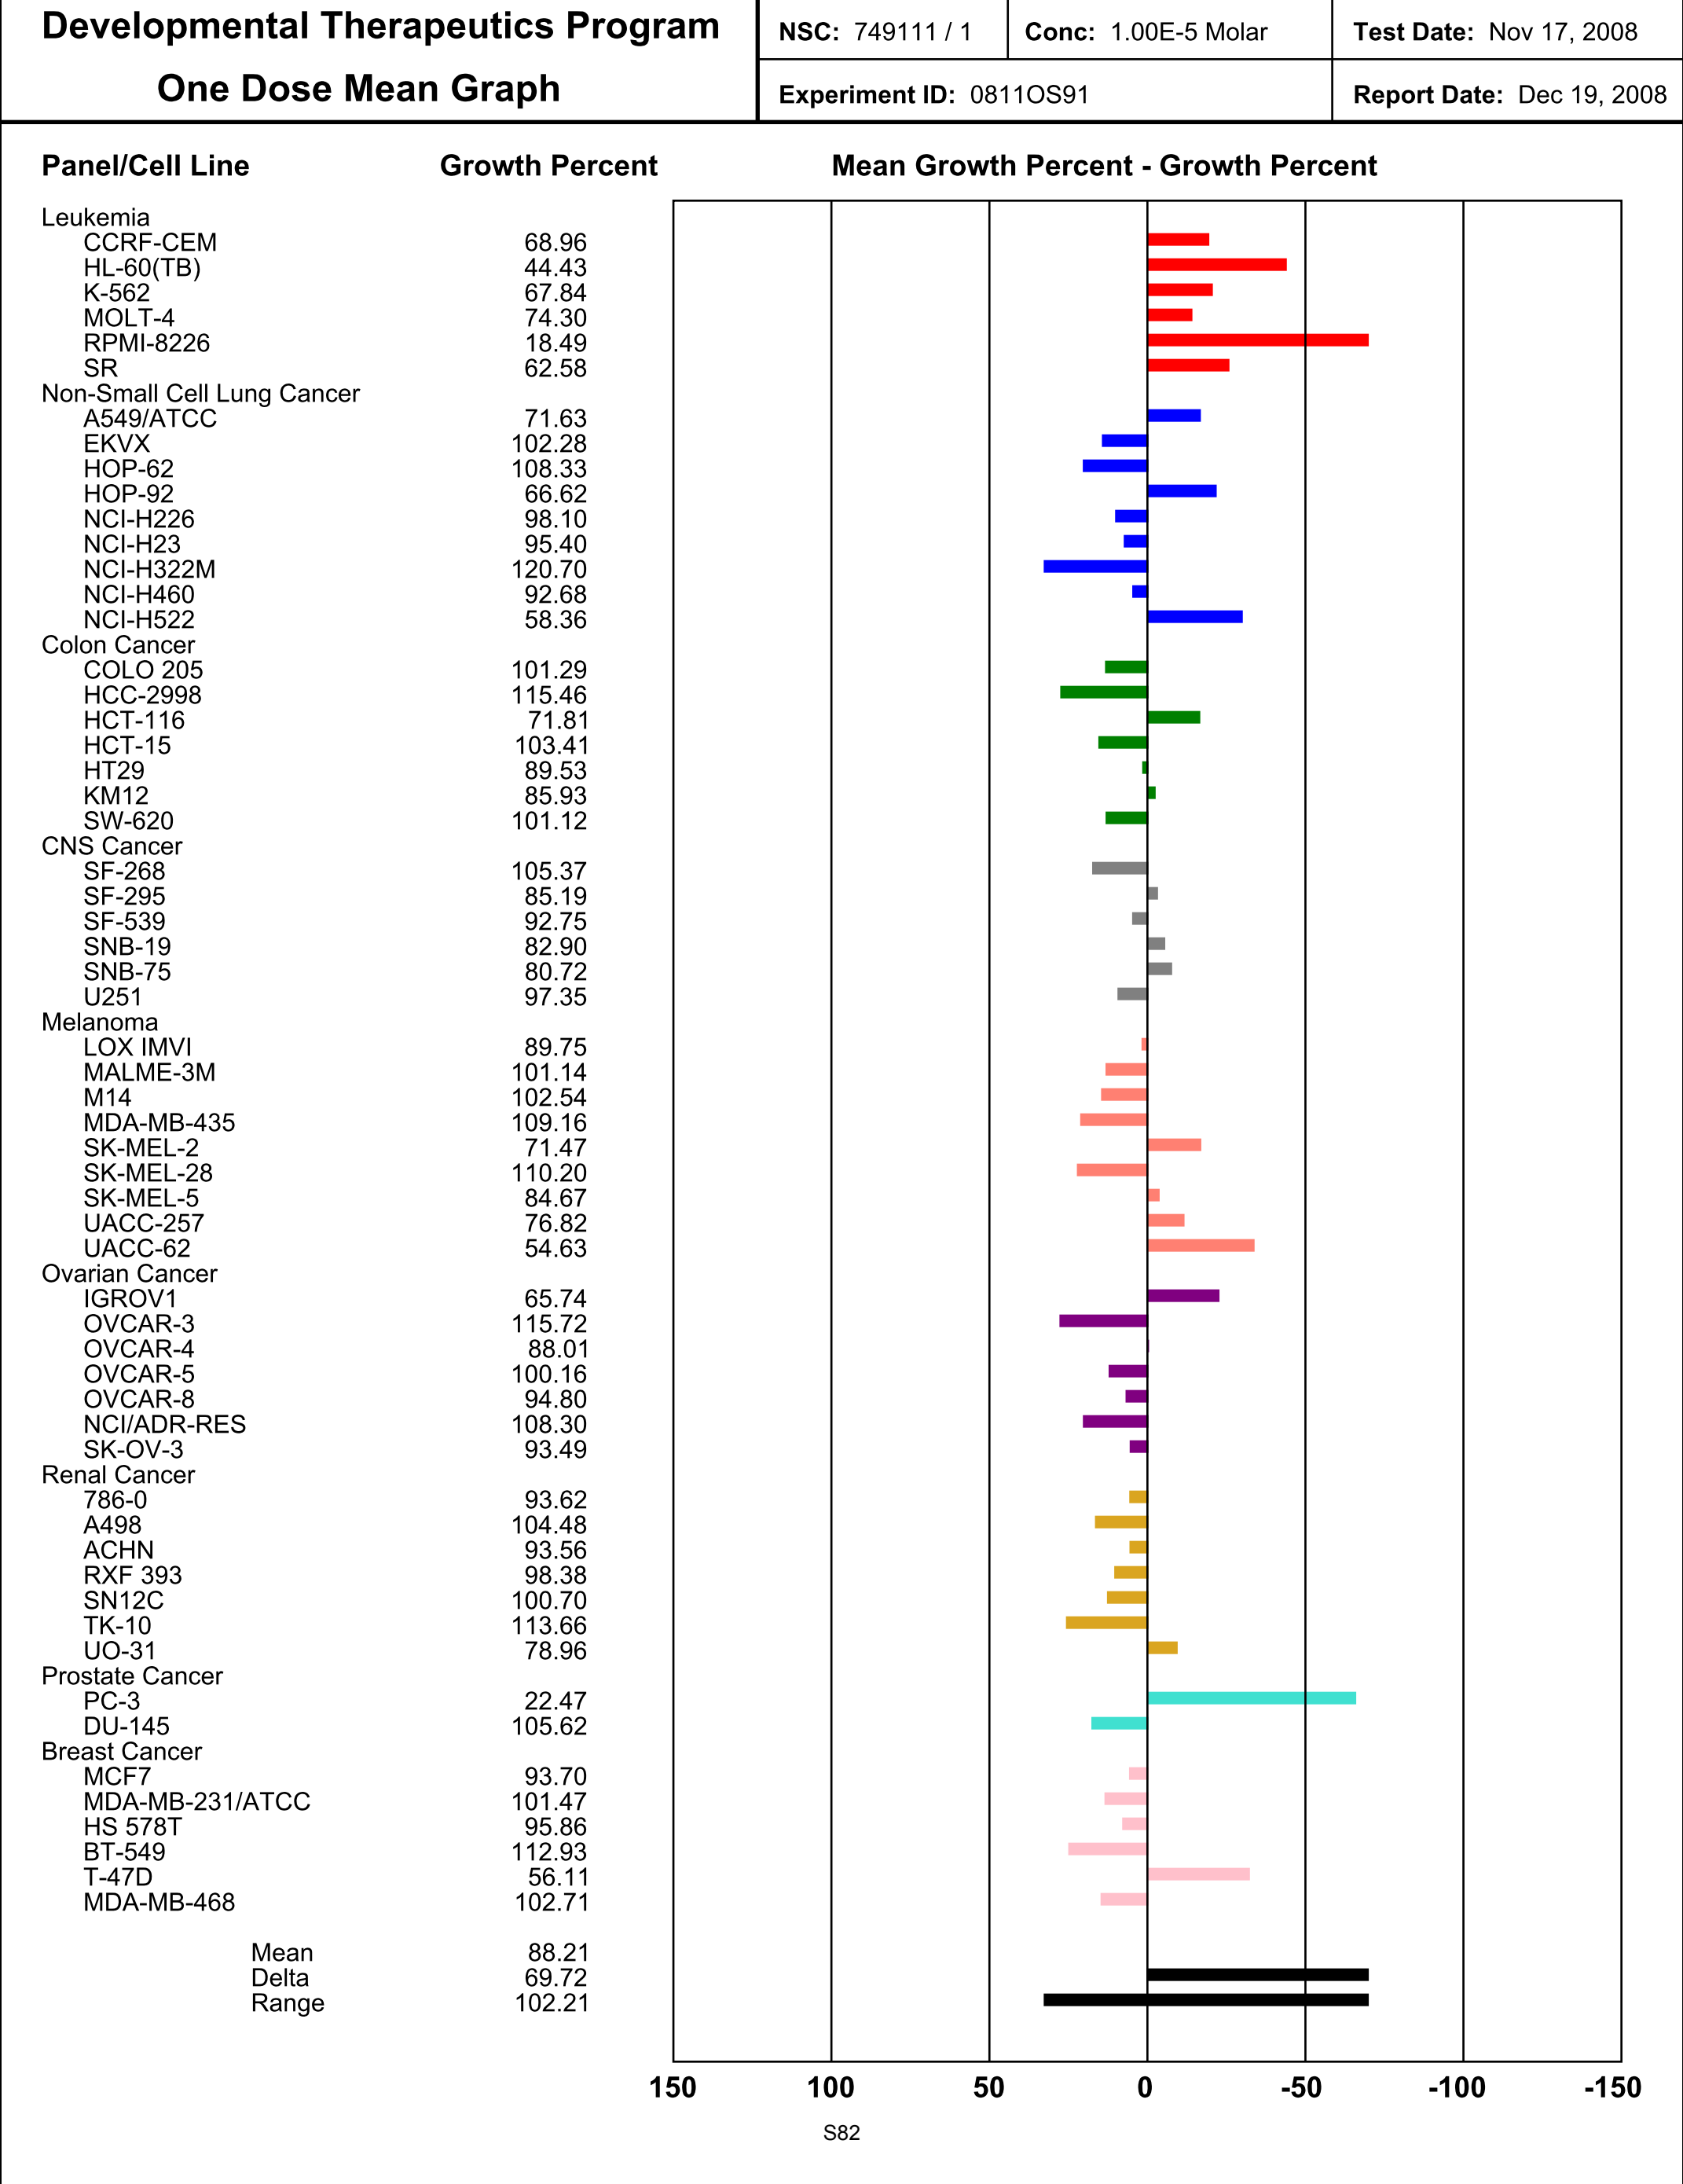

All Cell Lines

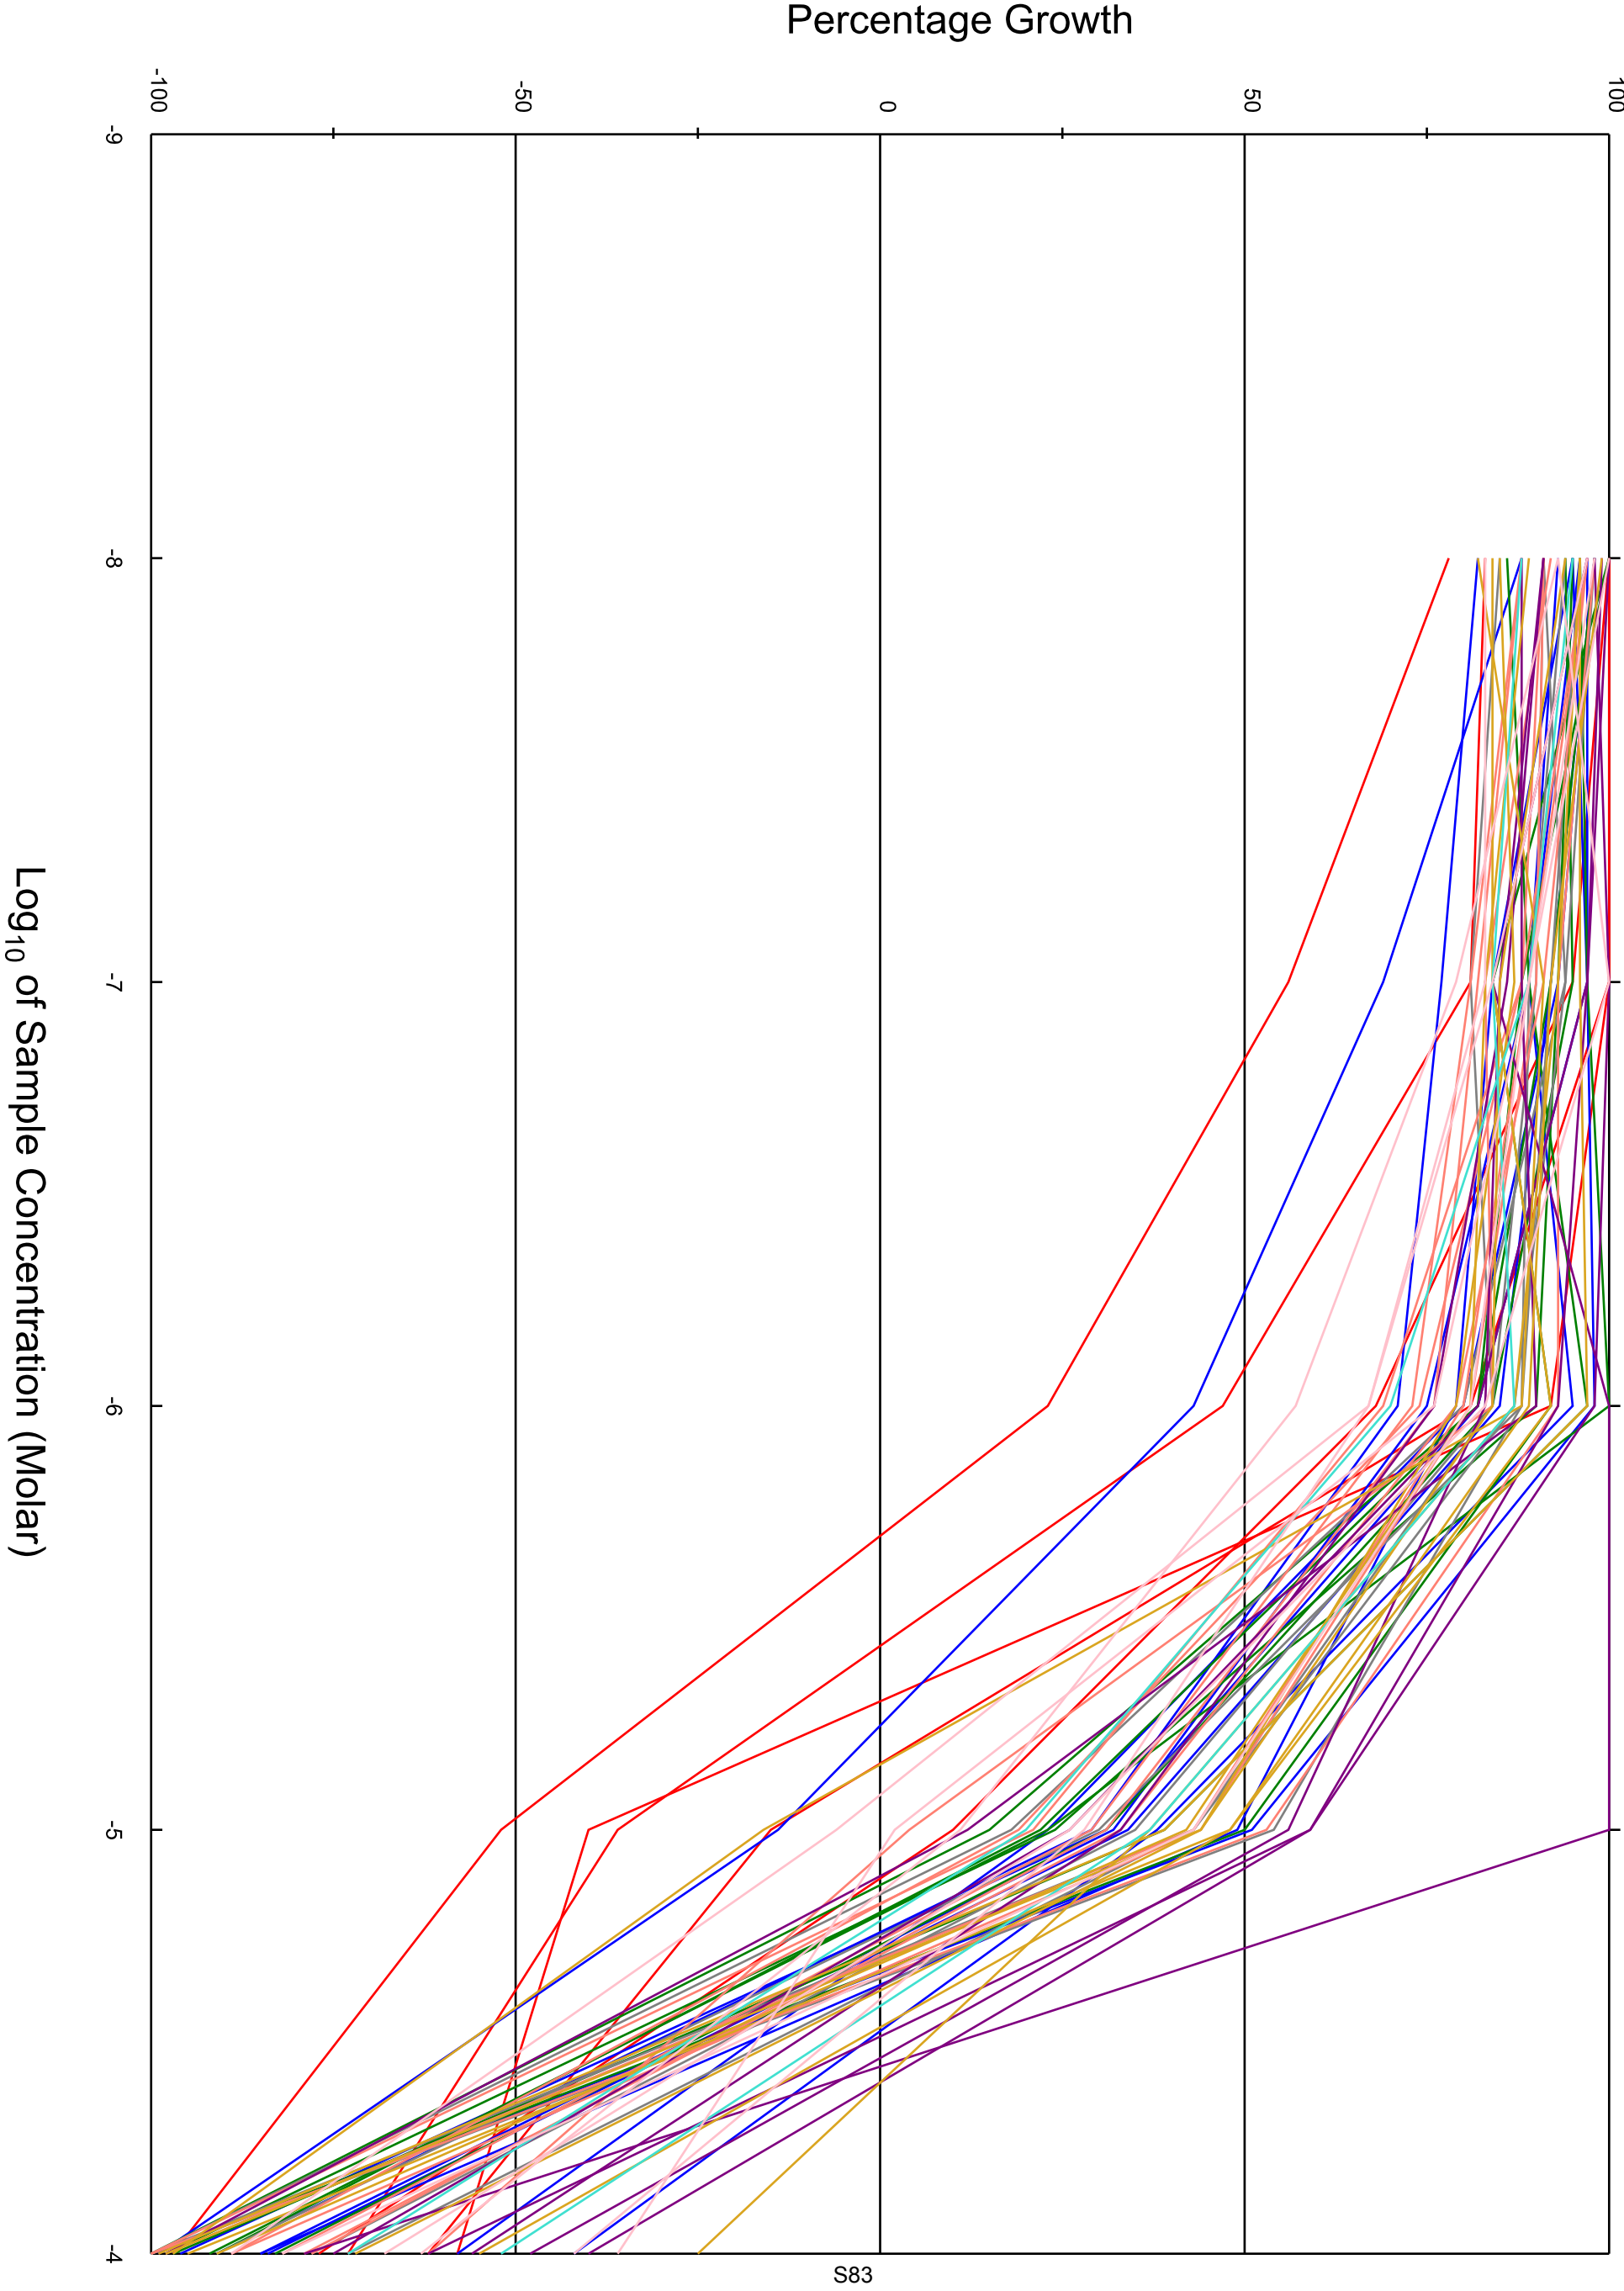

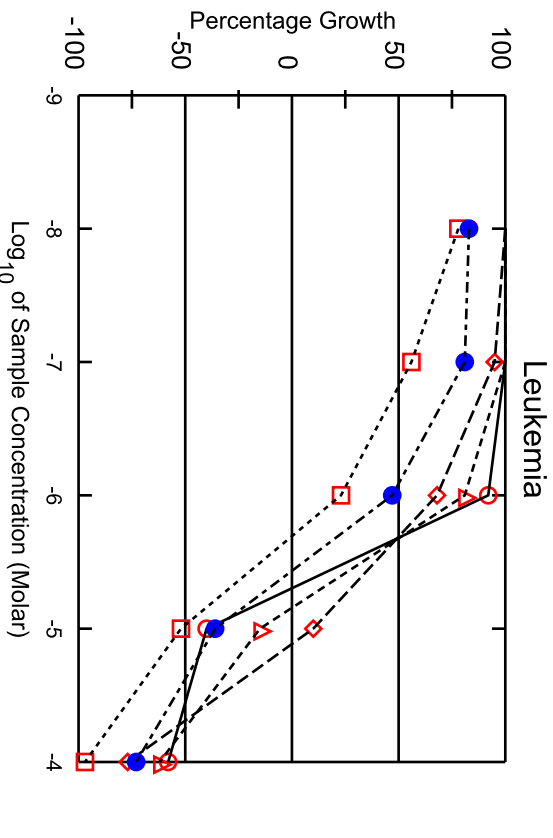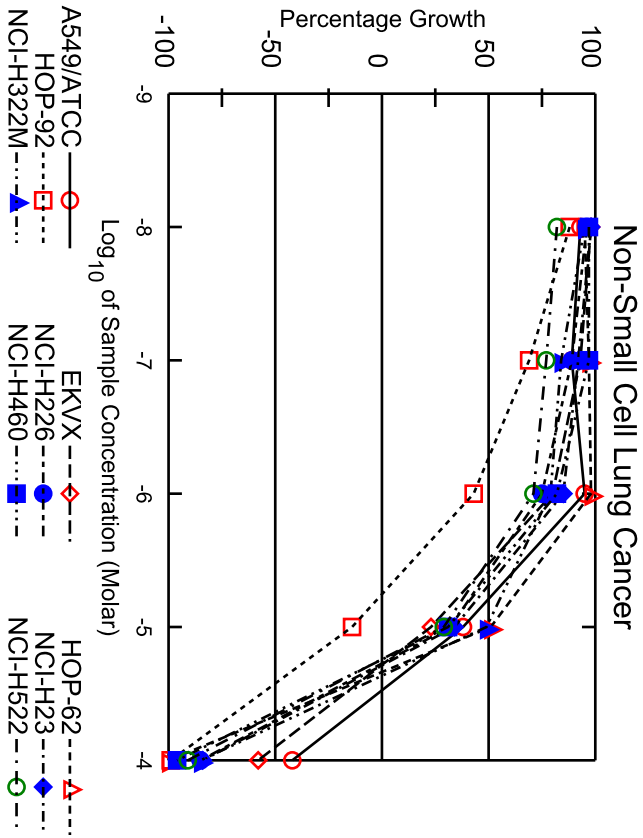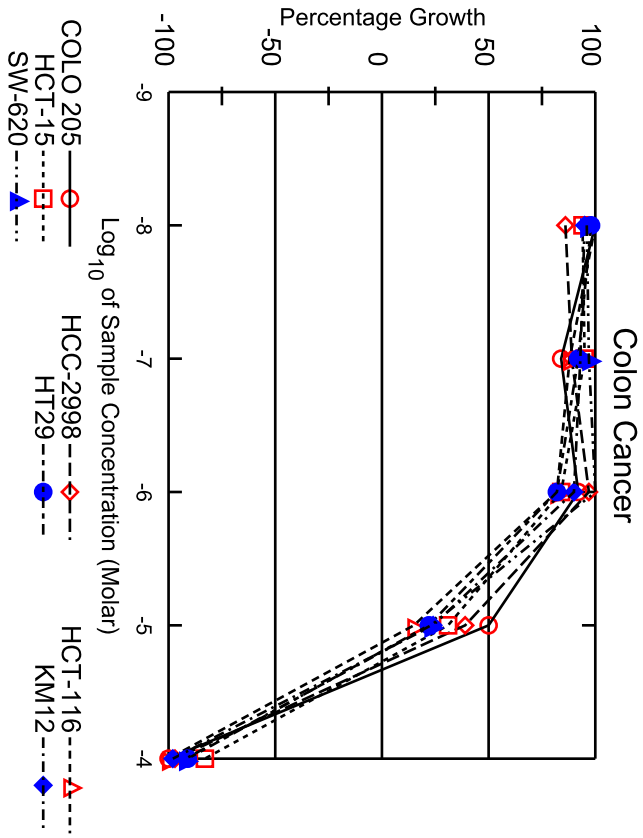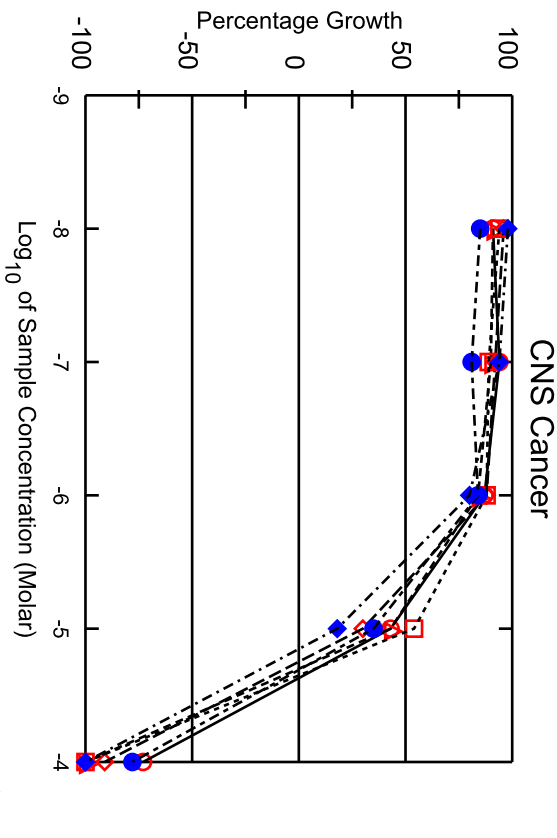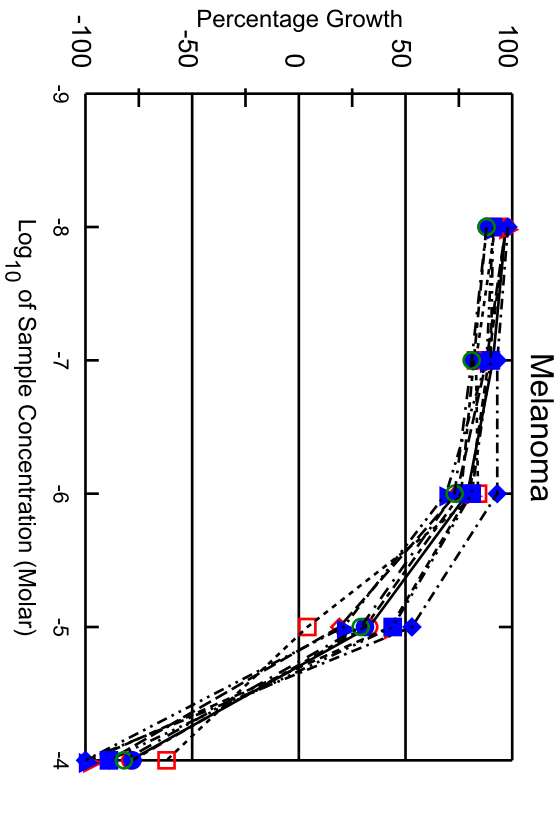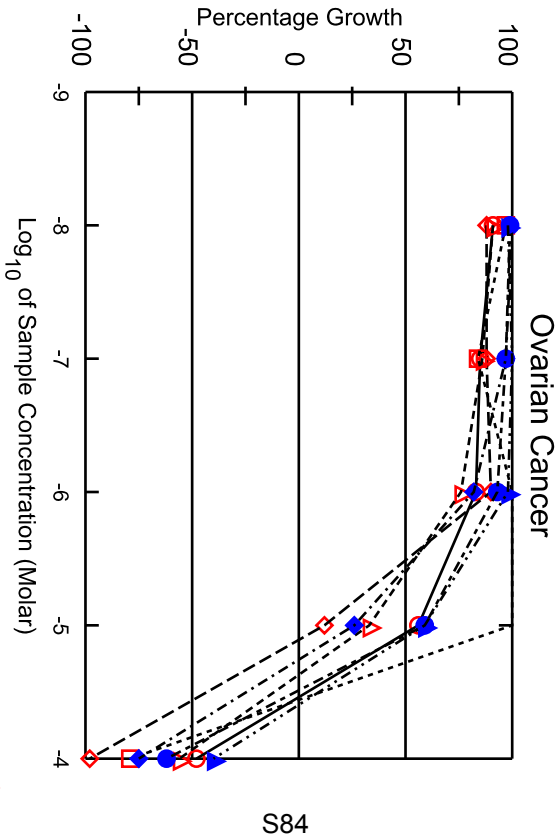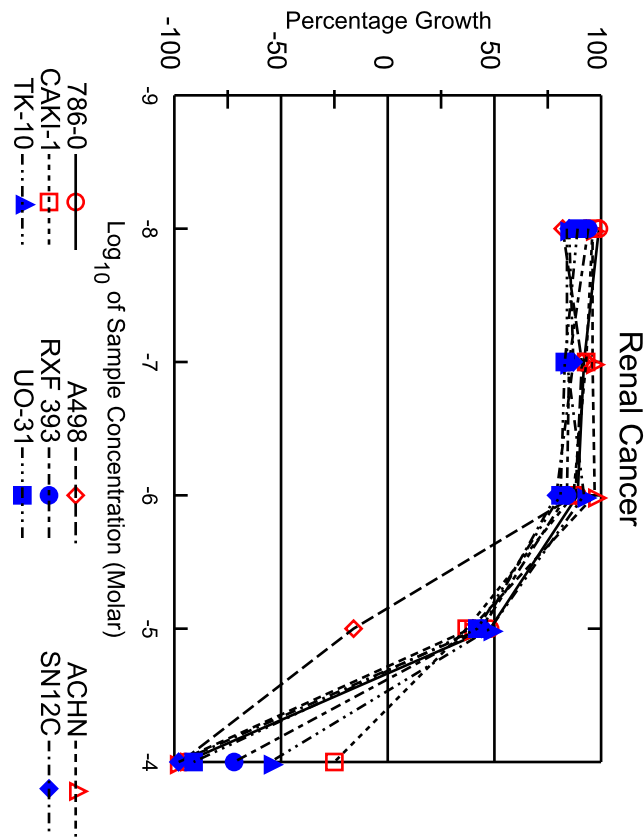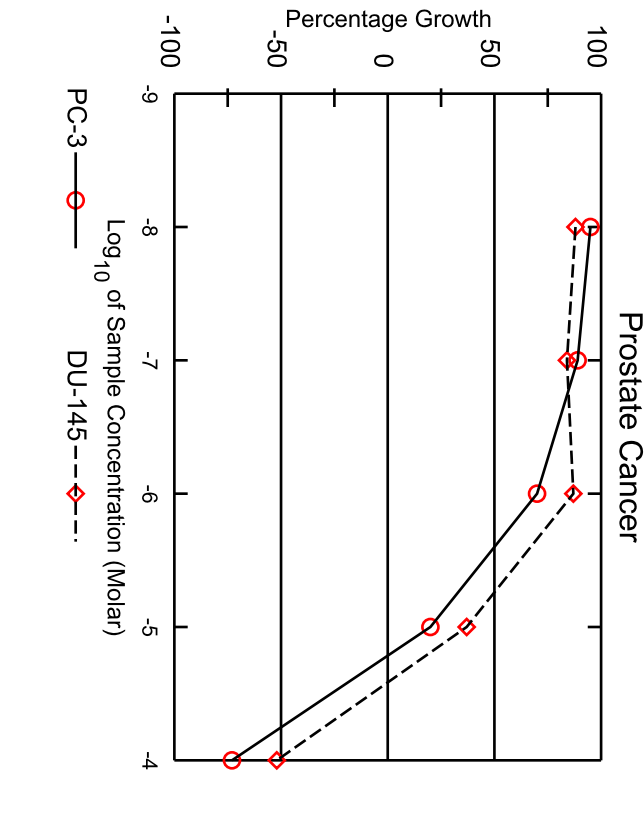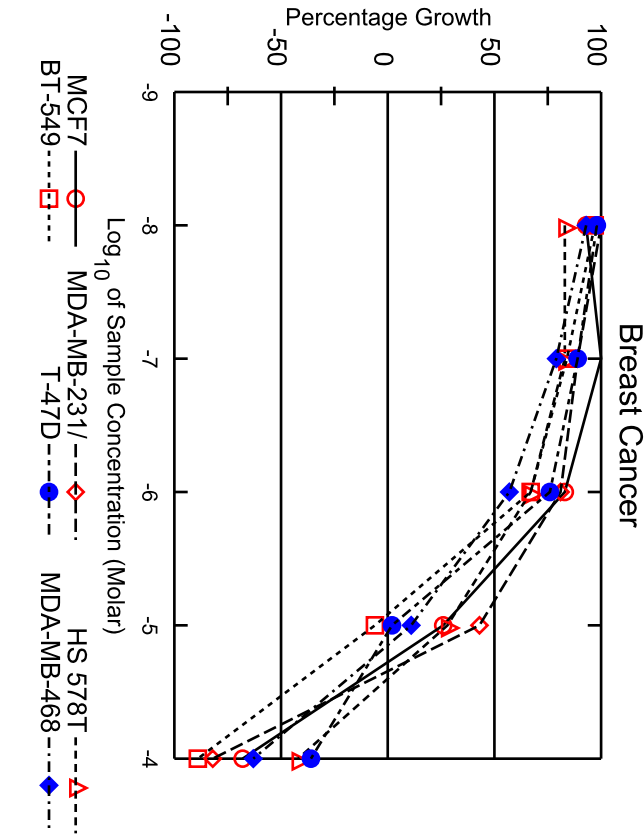

National Cancer Institute Developmental Therapeutics Program  
In-Vitro Testing Results

|                              |                                       |                |               |
|------------------------------|---------------------------------------|----------------|---------------|
| NSC : D - 749112 / 1         | Experiment ID : 0902NS35              | Test Type : 08 | Units : Molar |
| Report Date : March 24, 2009 | Test Date : February 02, 2009         | QNS :          | MC :          |
| COMI : DB.10h (81264)        | Stain Reagent : SRB Dual-Pass Related | SSPL : 0XCV    |               |

| Panel/Cell Line            | Log10 Concentration |                        |       |       |       |       |        |                |      |      |      |      |         |         |           |
|----------------------------|---------------------|------------------------|-------|-------|-------|-------|--------|----------------|------|------|------|------|---------|---------|-----------|
|                            | Time Zero           | Mean Optical Densities |       |       |       |       |        | Percent Growth |      |      |      |      | GI50    | TGI     | LC50      |
|                            | Ctrl                | -8.0                   | -7.0  | -6.0  | -5.0  | -4.0  |        | -8.0           | -7.0 | -6.0 | -5.0 | -4.0 |         |         |           |
| Leukemia                   |                     |                        |       |       |       |       |        |                |      |      |      |      |         |         |           |
| HL-60(TB)                  | 0.986               | 2.104                  | 2.149 | 2.153 | 2.017 | 0.589 | 0.415  | 104            | 104  | 92   | -40  | -58  | 2.08E-6 | 4.97E-6 | 3.55E-5   |
| K-562                      | 0.252               | 1.205                  | 1.210 | 1.156 | 0.897 | 0.352 | 0.059  | 101            | 95   | 68   | 10   | -77  | 2.04E-6 | 1.32E-5 | 4.93E-5   |
| MOLT-4                     | 0.530               | 1.404                  | 1.457 | 1.404 | 1.241 | 0.452 | 0.203  | 106            | 100  | 81   | -15  | -62  | 2.12E-6 | 7.03E-6 | 5.62E-5   |
| RPMI-8226                  | 0.854               | 1.741                  | 1.548 | 1.348 | 1.056 | 0.409 | 0.028  | 78             | 56   | 23   | -52  | -97  | 1.48E-7 | 2.01E-6 | 9.36E-6   |
| SR                         | 0.425               | 0.820                  | 0.753 | 0.744 | 0.609 | 0.273 | 0.114  | 83             | 81   | 47   | -36  | -73  | 7.98E-7 | 3.67E-6 | 2.39E-5   |
| Non-Small Cell Lung Cancer |                     |                        |       |       |       |       |        |                |      |      |      |      |         |         |           |
| A549/ATCC                  | 0.245               | 1.246                  | 1.178 | 1.135 | 1.193 | 0.627 | 0.143  | 93             | 89   | 95   | 38   | -42  | 6.17E-6 | 3.01E-5 | > 1.00E-4 |
| EKVX                       | 0.596               | 1.398                  | 1.380 | 1.341 | 1.236 | 0.783 | 0.252  | 98             | 93   | 80   | 23   | -58  | 3.37E-6 | 1.94E-5 | 8.03E-5   |
| HOP-62                     | 0.452               | 1.137                  | 1.100 | 1.115 | 1.124 | 0.801 | 0.002  | 95             | 97   | 98   | 51   | -100 | 1.01E-5 | 2.18E-5 | 4.68E-5   |
| HOP-92                     | 0.824               | 1.239                  | 1.188 | 1.112 | 1.004 | 0.712 | 0.011  | 88             | 69   | 43   | -14  | -99  | 5.52E-7 | 5.76E-6 | 2.68E-5   |
| NCI-H226                   | 0.670               | 1.231                  | 1.206 | 1.171 | 1.090 | 0.851 | 0.104  | 96             | 89   | 75   | 32   | -85  | 3.82E-6 | 1.89E-5 | 5.06E-5   |
| NCI-H23                    | 0.665               | 1.820                  | 1.792 | 1.723 | 1.648 | 1.060 | 0.105  | 98             | 92   | 85   | 34   | -84  | 4.88E-6 | 1.94E-5 | 5.14E-5   |
| NCI-H322M                  | 0.621               | 1.739                  | 1.686 | 1.557 | 1.507 | 1.173 | 0.091  | 95             | 84   | 79   | 49   | -85  | 9.50E-6 | 2.32E-5 | 5.46E-5   |
| NCI-H460                   | 0.261               | 2.111                  | 2.057 | 2.061 | 1.784 | 0.832 | 0.011  | 97             | 97   | 82   | 31   | -96  | 4.24E-6 | 1.75E-5 | 4.34E-5   |
| NCI-H522                   | 0.396               | 1.269                  | 1.111 | 1.069 | 1.013 | 0.649 | 0.036  | 82             | 77   | 71   | 29   | -91  | 3.13E-6 | 1.74E-5 | 4.55E-5   |
| Colon Cancer               |                     |                        |       |       |       |       |        |                |      |      |      |      |         |         |           |
| COLO 205                   | 0.280               | 0.968                  | 0.978 | 0.859 | 0.910 | 0.621 | -0.011 | 101            | 84   | 92   | 50   | -100 | 9.77E-6 | 2.15E-5 | 4.63E-5   |
| HCC-2998                   | 0.683               | 1.954                  | 1.779 | 1.818 | 1.915 | 1.176 | 0.024  | 86             | 89   | 97   | 39   | -97  | 6.40E-6 | 1.93E-5 | 4.53E-5   |
| HCT-116                    | 0.251               | 1.689                  | 1.718 | 1.524 | 1.424 | 0.472 | -0.014 | 102            | 88   | 82   | 15   | -100 | 3.00E-6 | 1.36E-5 | 3.69E-5   |
| HCT-15                     | 0.376               | 2.159                  | 2.057 | 2.072 | 1.878 | 0.927 | 0.063  | 94             | 95   | 84   | 31   | -83  | 4.38E-6 | 1.86E-5 | 5.10E-5   |
| HT29                       | 0.149               | 0.997                  | 0.976 | 0.928 | 0.845 | 0.334 | 0.013  | 98             | 92   | 82   | 22   | -91  | 3.41E-6 | 1.56E-5 | 4.32E-5   |
| KM12                       | 0.466               | 2.085                  | 2.011 | 1.964 | 1.921 | 0.853 | 0.010  | 95             | 93   | 90   | 24   | -98  | 4.02E-6 | 1.57E-5 | 4.04E-5   |
| SW-620                     | 0.291               | 1.511                  | 1.462 | 1.472 | 1.520 | 0.572 | 0.025  | 96             | 97   | 101  | 23   | -92  | 4.49E-6 | 1.59E-5 | 4.34E-5   |
| CNS Cancer                 |                     |                        |       |       |       |       |        |                |      |      |      |      |         |         |           |
| SF-268                     | 0.362               | 1.187                  | 1.115 | 1.136 | 1.077 | 0.718 | 0.096  | 91             | 94   | 87   | 43   | -73  | 6.95E-6 | 2.34E-5 | 6.29E-5   |
| SF-295                     | 1.371               | 3.235                  | 3.161 | 3.095 | 3.020 | 1.921 | 0.124  | 96             | 92   | 88   | 30   | -91  | 4.49E-6 | 1.76E-5 | 4.57E-5   |
| SF-539                     | 0.743               | 2.275                  | 2.135 | 2.118 | 2.026 | 1.406 | -0.001 | 91             | 90   | 84   | 43   | -100 | 6.82E-6 | 2.00E-5 | 4.48E-5   |
| SNB-19                     | 0.642               | 1.499                  | 1.445 | 1.403 | 1.398 | 1.107 | -0.007 | 94             | 89   | 88   | 54   | -100 | 1.07E-5 | 2.25E-5 | 4.74E-5   |
| SNB-75                     | 0.585               | 1.212                  | 1.119 | 1.092 | 1.111 | 0.805 | 0.132  | 85             | 81   | 84   | 35   | -78  | 4.94E-6 | 2.05E-5 | 5.69E-5   |
| U251                       | 0.235               | 1.379                  | 1.353 | 1.309 | 1.153 | 0.442 | -0.001 | 98             | 94   | 80   | 18   | -100 | 3.06E-6 | 1.42E-5 | 3.77E-5   |
| Melanoma                   |                     |                        |       |       |       |       |        |                |      |      |      |      |         |         |           |
| LOX IMVI                   | 0.270               | 1.964                  | 1.911 | 1.807 | 1.603 | 0.835 | 0.058  | 97             | 91   | 79   | 33   | -79  | 4.30E-6 | 1.98E-5 | 5.54E-5   |
| MALME-3M                   | 0.708               | 1.590                  | 1.562 | 1.485 | 1.365 | 0.879 | 0.080  | 97             | 88   | 74   | 19   | -89  | 2.78E-6 | 1.51E-5 | 4.38E-5   |
| M14                        | 0.256               | 0.915                  | 0.897 | 0.846 | 0.785 | 0.540 | 0.005  | 97             | 89   | 80   | 43   | -98  | 6.51E-6 | 2.02E-5 | 4.56E-5   |
| MDA-MB-435                 | 0.472               | 1.904                  | 1.787 | 1.665 | 1.676 | 0.524 | 0.181  | 92             | 83   | 84   | 4    | -62  | 2.65E-6 | 1.14E-5 | 6.63E-5   |
| SK-MEL-2                   | 0.507               | 0.967                  | 0.913 | 0.886 | 0.856 | 0.649 | 0.111  | 88             | 82   | 76   | 31   | -78  | 3.74E-6 | 1.92E-5 | 5.52E-5   |
| SK-MEL-28                  | 0.479               | 1.173                  | 1.157 | 1.121 | 1.122 | 0.847 | -0.001 | 98             | 93   | 93   | 53   | -100 | 1.05E-5 | 2.22E-5 | 4.71E-5   |
| SK-MEL-5                   | 0.327               | 1.972                  | 1.816 | 1.779 | 1.461 | 0.673 | -0.015 | 91             | 88   | 69   | 21   | -100 | 2.48E-6 | 1.49E-5 | 3.86E-5   |
| UACC-257                   | 0.602               | 1.345                  | 1.280 | 1.272 | 1.201 | 0.926 | 0.067  | 91             | 90   | 81   | 44   | -89  | 6.71E-6 | 2.13E-5 | 5.09E-5   |
| UACC-62                    | 0.265               | 0.930                  | 0.852 | 0.804 | 0.748 | 0.459 | 0.048  | 88             | 81   | 73   | 29   | -82  | 3.31E-6 | 1.83E-5 | 5.15E-5   |
| Ovarian Cancer             |                     |                        |       |       |       |       |        |                |      |      |      |      |         |         |           |
| IGROV1                     | 0.319               | 1.316                  | 1.225 | 1.164 | 1.144 | 0.874 | 0.167  | 91             | 85   | 83   | 56   | -48  | 1.13E-5 | 3.46E-5 | > 1.00E-4 |
| OVCAR-3                    | 0.361               | 0.987                  | 0.914 | 0.912 | 0.925 | 0.434 | 0.007  | 88             | 88   | 90   | 12   | -98  | 3.24E-6 | 1.28E-5 | 3.65E-5   |
| OVCAR-4                    | 0.397               | 1.403                  | 1.310 | 1.266 | 1.165 | 0.733 | 0.177  | 91             | 86   | 76   | 33   | -56  | 4.10E-6 | 2.37E-5 | 8.66E-5   |
| OVCAR-5                    | 0.478               | 0.903                  | 0.891 | 0.837 | 0.905 | 1.015 | 0.101  | 97             | 84   | 100  | 126  | -79  | 2.36E-5 | 4.13E-5 | 7.23E-5   |
| OVCAR-8                    | 0.302               | 1.242                  | 1.233 | 1.210 | 1.181 | 0.858 | 0.114  | 99             | 97   | 93   | 59   | -62  | 1.19E-5 | 3.06E-5 | 7.90E-5   |
| NCI/ADR-RES                | 0.556               | 1.619                  | 1.667 | 1.589 | 1.423 | 0.829 | 0.137  | 105            | 97   | 82   | 26   | -75  | 3.67E-6 | 1.79E-5 | 5.61E-5   |
| SK-OV-3                    | 0.621               | 1.326                  | 1.309 | 1.323 | 1.314 | 1.037 | 0.372  | 98             | 100  | 98   | 59   | -40  | 1.23E-5 | 3.93E-5 | > 1.00E-4 |
| Renal Cancer               |                     |                        |       |       |       |       |        |                |      |      |      |      |         |         |           |
| 786-0                      | 0.594               | 2.154                  | 2.139 | 2.032 | 1.980 | 1.336 | 0.027  | 99             | 92   | 89   | 48   | -95  | 8.73E-6 | 2.15E-5 | 4.81E-5   |
| A498                       | 1.150               | 1.457                  | 1.402 | 1.430 | 1.422 | 0.970 | 0.035  | 82             | 91   | 88   | -16  | -97  | 2.34E-6 | 7.07E-6 | 2.65E-5   |
| ACHN                       | 0.334               | 1.372                  | 1.332 | 1.333 | 1.344 | 0.734 | 0.002  | 96             | 96   | 97   | 39   | -99  | 6.39E-6 | 1.90E-5 | 4.38E-5   |
| CAKI-1                     | 0.864               | 2.632                  | 2.565 | 2.515 | 2.399 | 1.520 | 0.651  | 96             | 93   | 87   | 37   | -25  | 5.50E-6 | 3.98E-5 | > 1.00E-4 |
| RXF 393                    | 0.398               | 1.056                  | 1.016 | 0.960 | 0.954 | 0.686 | 0.112  | 94             | 85   | 84   | 44   | -72  | 7.00E-6 | 2.39E-5 | 6.47E-5   |
| SN12C                      | 0.544               | 1.869                  | 1.668 | 1.703 | 1.593 | 1.123 | 0.012  | 85             | 87   | 79   | 44   | -98  | 6.63E-6 | 2.03E-5 | 4.59E-5   |
| TK-10                      | 0.599               | 1.222                  | 1.123 | 1.124 | 1.170 | 0.897 | 0.268  | 84             | 84   | 92   | 48   | -55  | 8.93E-6 | 2.91E-5 | 8.89E-5   |
| UO-31                      | 0.460               | 1.368                  | 1.264 | 1.217 | 1.193 | 0.845 | 0.041  | 89             | 83   | 81   | 42   | -91  | 6.32E-6 | 2.08E-5 | 4.92E-5   |
| Prostate Cancer            |                     |                        |       |       |       |       |        |                |      |      |      |      |         |         |           |
| PC-3                       | 0.422               | 1.262                  | 1.218 | 1.166 | 1.006 | 0.592 | 0.116  | 95             | 89   | 70   | 20   | -73  | 2.49E-6 | 1.65E-5 | 5.72E-5   |
| DU-145                     | 0.297               | 1.210                  | 1.104 | 1.061 | 1.089 | 0.637 | 0.142  | 88             | 84   | 87   | 37   | -52  | 5.53E-6 | 2.61E-5 | 9.45E-5   |
| Breast Cancer              |                     |                        |       |       |       |       |        |                |      |      |      |      |         |         |           |
| MCF7                       | 0.265               | 1.401                  | 1.317 | 1.441 | 1.209 | 0.557 | 0.084  | 93             | 103  | 83   | 26   | -68  | 3.77E-6 | 1.88E-5 | 6.39E-5   |
| MDA-MB-231/ATCC            | 0.489               | 1.367                  | 1.378 | 1.271 | 1.204 | 0.871 | 0.090  | 101            | 89   | 81   | 43   | -82  | 6.73E-6 | 2.23E-5 | 5.59E-5   |
| HS 578T                    | 0.689               | 1.300                  | 1.194 | 1.194 | 1.099 | 0.858 | 0.397  | 83             | 83   | 67   | 28   | -42  | 2.72E-6 | 2.48E-5 | > 1.00E-4 |
| BT-549                     | 1.527               | 2.435                  | 2.405 | 2.293 | 2.136 | 1.442 | 0.166  | 97             | 84   | 67   | -6   | -89  | 1.72E-6 | 8.37E-6 | 3.40E-5   |
| T-47D                      | 0.705               | 1.402                  | 1.389 | 1.325 | 1.236 | 0.717 | 0.452  | 98             | 89   | 76   | 2    | -36  | 2.24E-6 | 1.11E-5 | > 1.00E-4 |
| MDA-MB-468                 | 0.404               | 1.289                  | 1.227 | 1.106 | 0.911 | 0.502 | 0.148  | 93             | 79   | 57   | 11   | -63  | 1.43E-6 | 1.41E-5 | 6.61E-5   |

National Cancer Institute Developmental Therapeutics Program

Mean Graphs

NSC : D - 749112/1

Units :Molar

SSPL :0XCV

EXP. ID :0902NS35

Report Date :March 24, 2009

Test Date :February 02, 2009

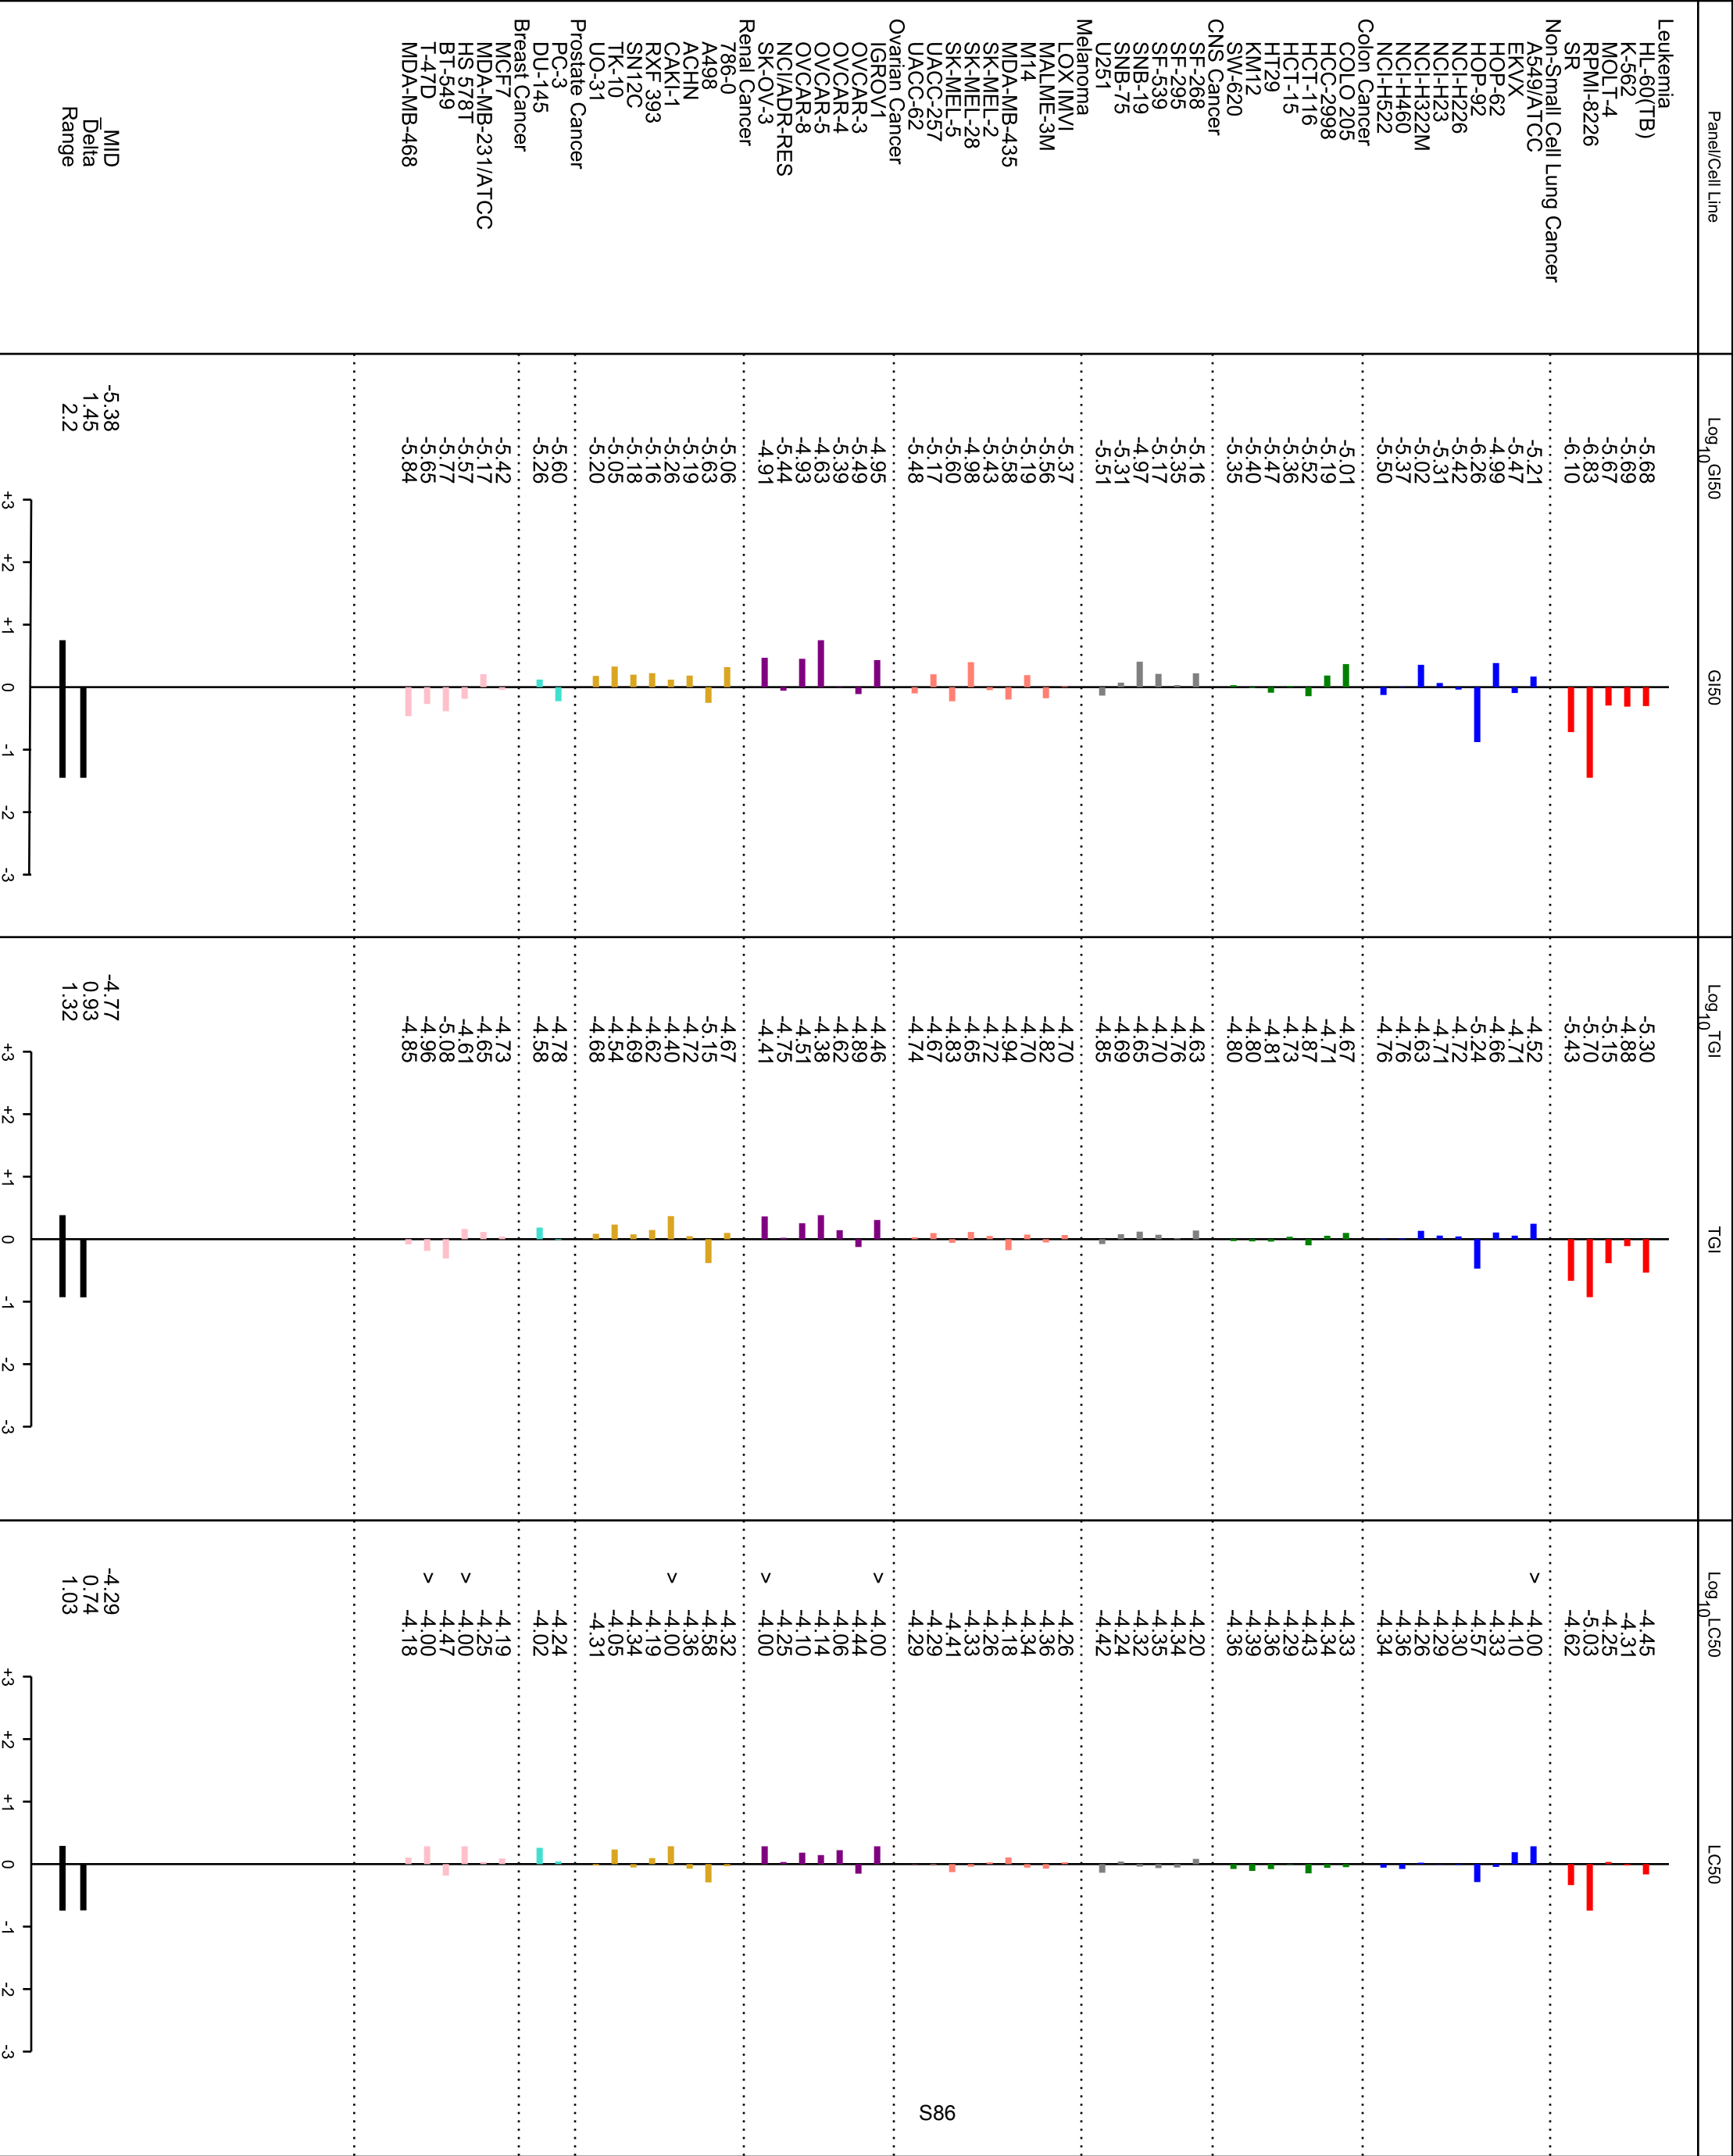

Supplement: NIHMS353537-supplement-01.pdf [file NIHMS353537-supplement-01.pdf]
